# Supplementary material
Source: PubMed Central journal article supplement (PMC7000997)
Supplement: mmc1.pdf [file mmc1.pdf]

YMTHE, Volume 28

## **Supplemental Information**

### **AAV-Mediated Gene Transfer Restores a Normal Muscle Transcriptome in a Canine Model of X-Linked Myotubular Myopathy**

**Jean-Baptiste Dupont, Jianjun Guo, Edith Renaud-Gabardos, Karine Poulard, Virginie Latournerie, Michael W. Lawlor, Robert W. Grange, John T. Gray, Ana Buj-Bello, Martin K. Childers, and David L. Mack**

### Gene Ontology TOP 500 *Biceps*

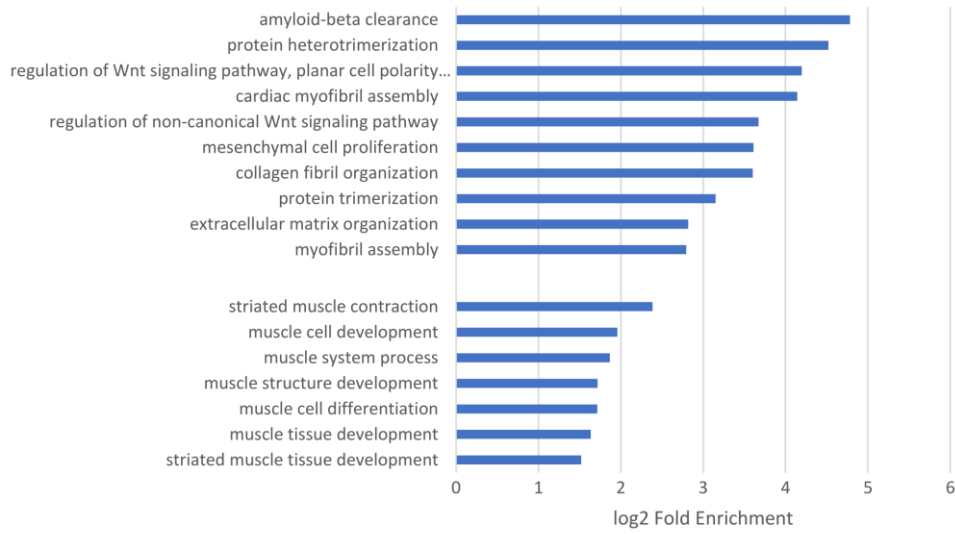

### Gene Ontology TOP 500 *Vastus*

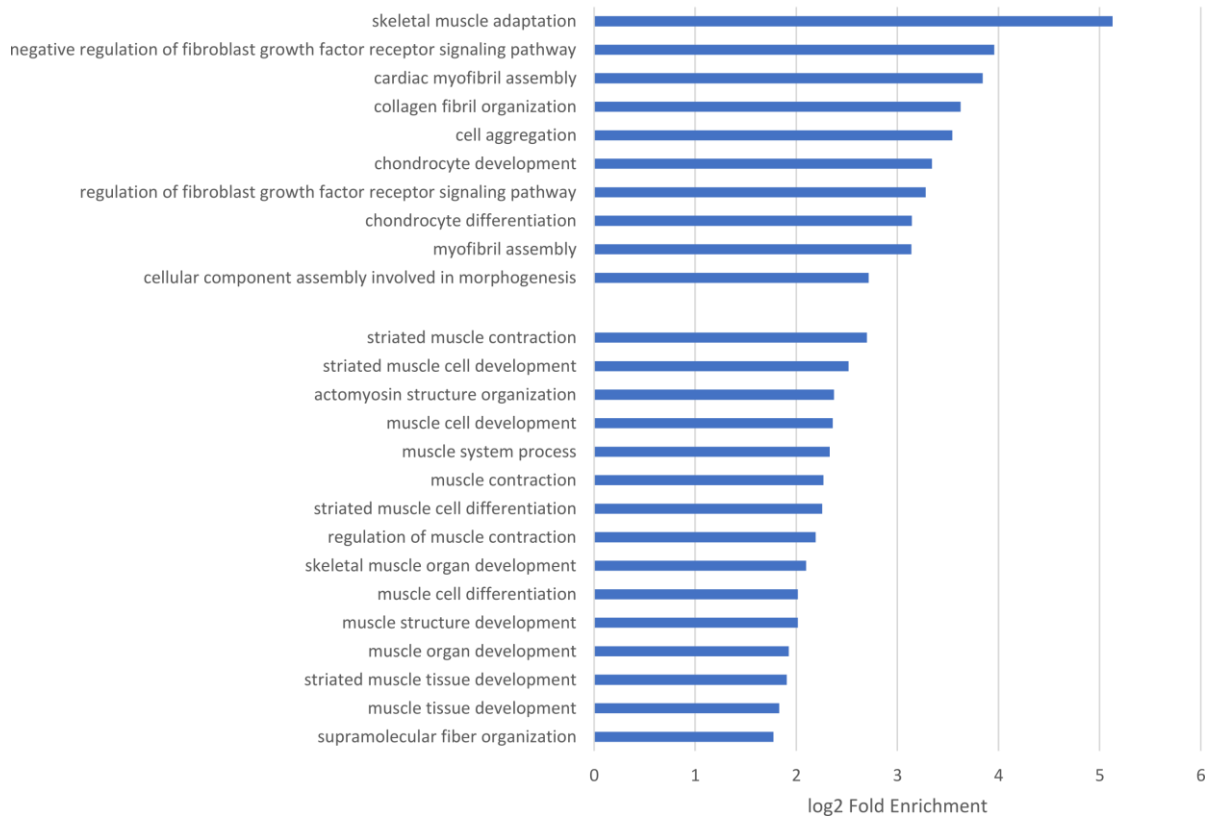

**Figure S1: Gene ontology analysis of the TOP 500 most informative genes.**

Gene ontology analysis of the 500 genes with the highest expression variance across samples in the *Biceps femoris* (top) and *Vastus lateralis* (bottom). The 10 GO terms with the highest fold enrichment (FE) are represented, and the muscle-related terms with a log<sub>2</sub> FE > 1.

**A Biceps femoris**

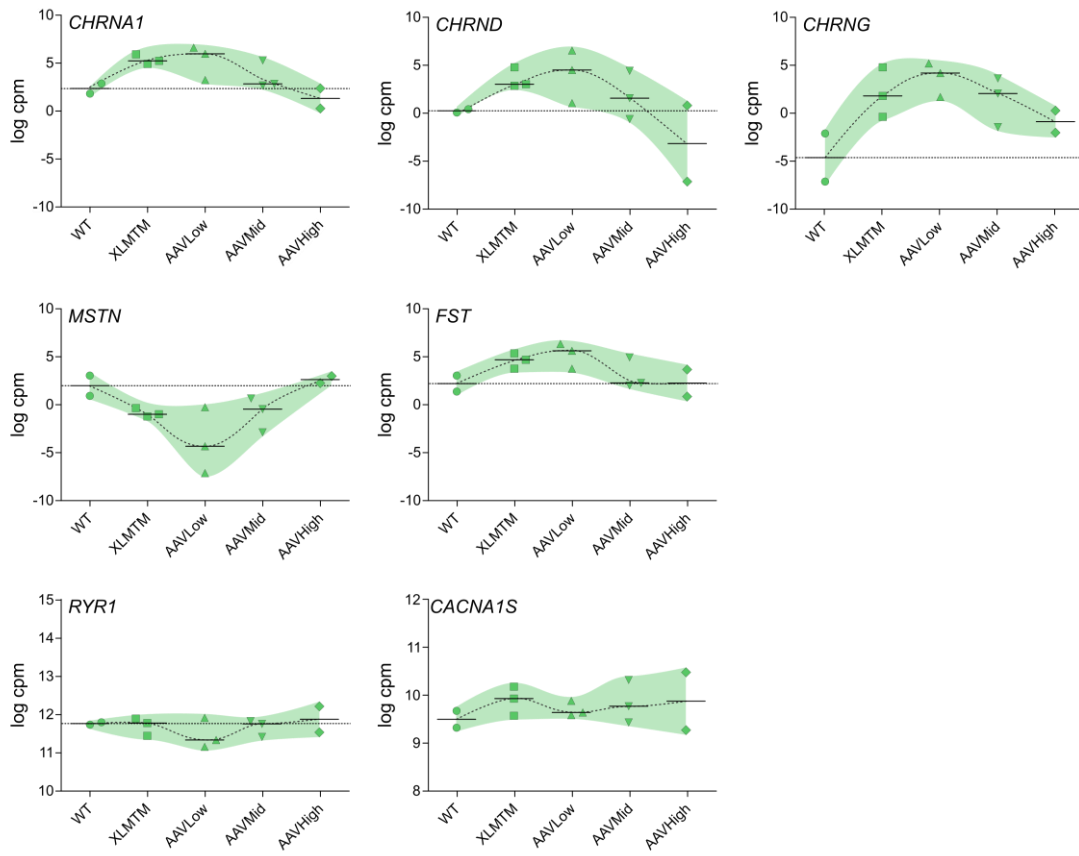

**B Vastus lateralis**

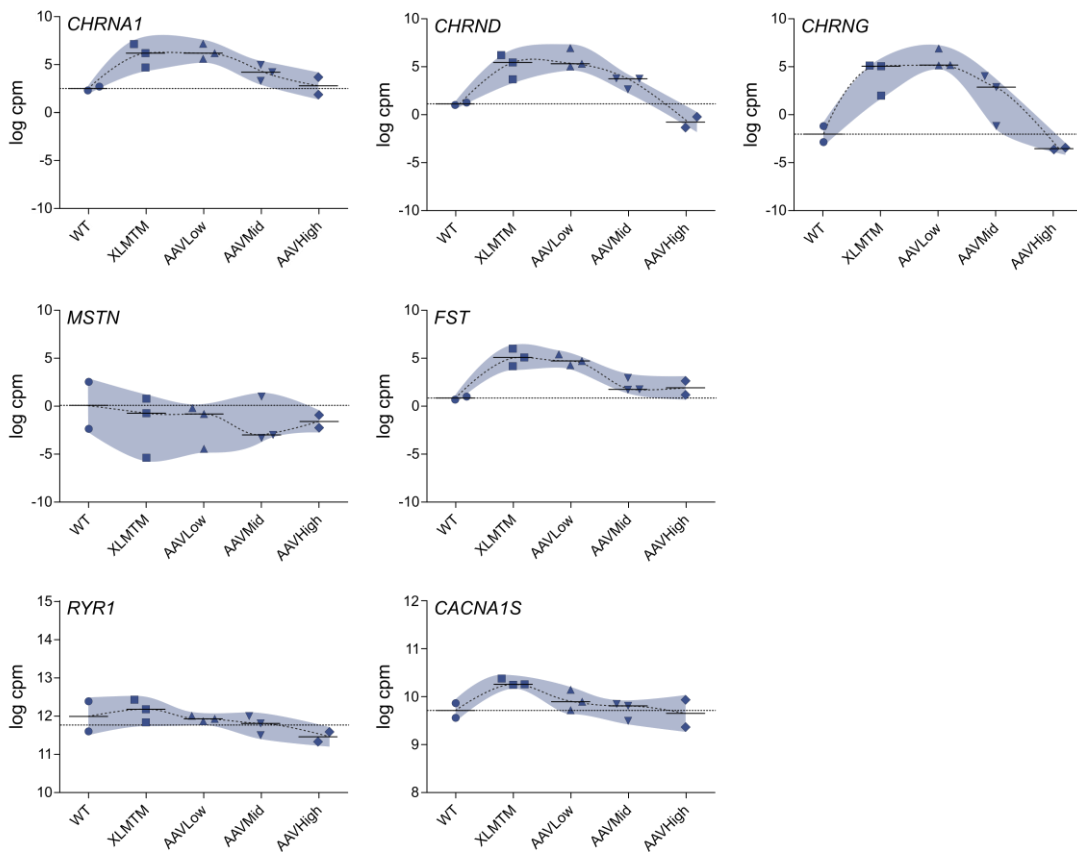

**Figure S2: Expression of individual genes associated with XLMTM in mice and human patients from RNA-Seq data in dogs.**

Gene expression data (log cpm) for three genes encoding cholinergic receptor subunits (*CHRNA1*, *CHRNA10*, *CHRND*), two myokines: myostatin (*MSTN*) and follistatin (*FST*), and two genes involved in excitation-contraction coupling: ryanodine receptor 1 (*RYR1*) and dihydropyridine receptor (*CACNA1S*) in the *Biceps femoris* (**A**) and the *Vastus lateralis* (**B**). Each symbol represents one individual dog. The median expression in healthy controls is shown as a horizontal dashed line, the expression range as a shaded area, and the evolution of the median as a dashed curve. cpm: count per million reads, log: base 2 logarithm.

### A *Biceps femoris*

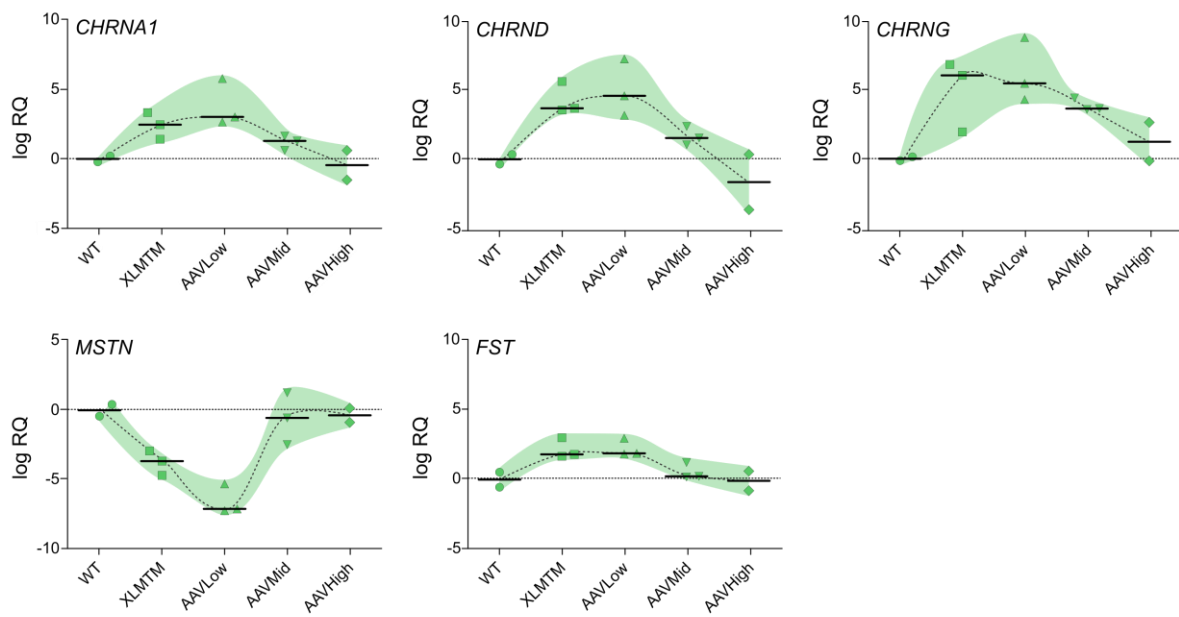

### B *Vastus lateralis*

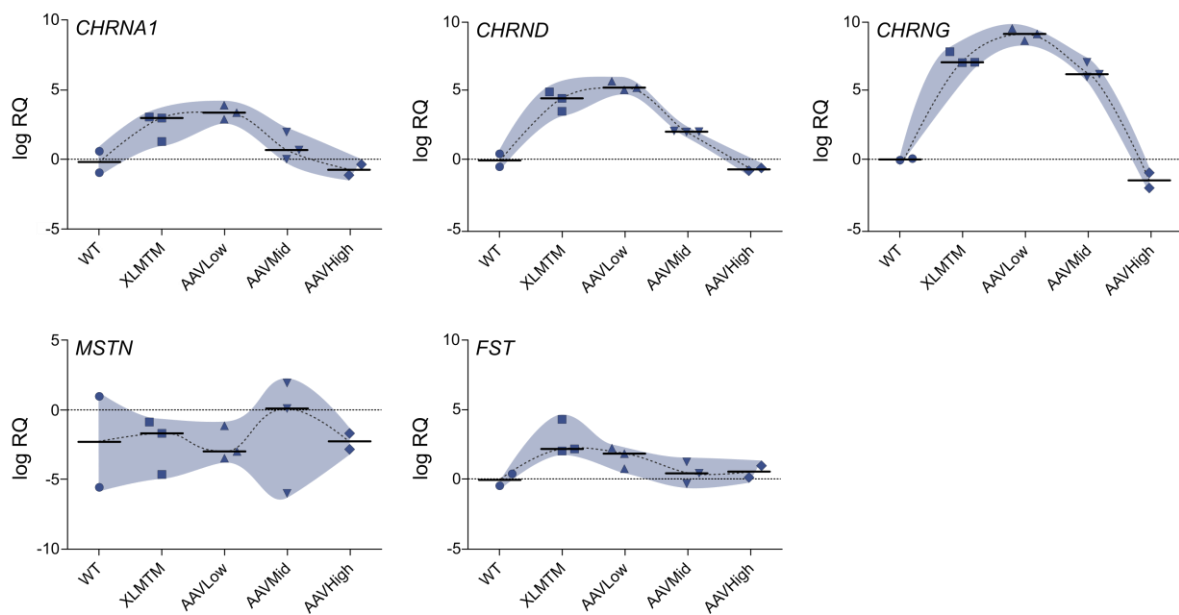

**Figure S3: Expression of individual genes associated with XLMTM from RT-qPCR data in dogs.**

Gene expression data (log RQ) for *CHRNA1*, *CHRNG*, *CHRND*, *MSTN* and *FST* in the *Biceps femoris* (A) and the *Vastus lateralis* (B). Each symbol represents one individual dog. The median expression in healthy controls is shown as a horizontal dashed line, the expression range as a shaded area, and the evolution of the median as a dashed curve. RQ: relative quantity after normalisation with the median value in the WT group, and the housekeeping gene *RPL32*. log: base 2 logarithm.

| SSAN ID  | Dog #  | Dog ID   | Group   | Genotype | Gender | Treatment | Necropsy |
|----------|--------|----------|---------|----------|--------|-----------|----------|
| SSAN_2   | Dog 03 | HEALTHY1 | healthy | WT       | Male   | Untreated | 39 weeks |
| SSAN_12  | Dog 09 | HEALTHY2 | healthy | WT       | Male   | Untreated | 39 weeks |
| SSAN_9   | Dog 06 | XLMTM1   | XLMTM   | XLMTM    | Female | Untreated | 18 weeks |
| SSAN_13  | Dog 10 | XLMTM2   | XLMTM   | XLMTM    | Female | Untreated | 22 weeks |
| SSAN_16  | Dog 12 | XLMTM3   | XLMTM   | XLMTM    | Male   | Untreated | 26 weeks |
| SSAN_8   | Dog 05 | AAVLOW1  | AAVLow  | XLMTM    | Male   | Low dose  | 24 weeks |
| SSAN_11  | Dog 08 | AAVLOW2  | AAVLow  | XLMTM    | Female | Low dose  | 28 weeks |
| SSAN_18  | Dog 13 | AAVLOW3  | AAVLow  | XLMTM    | Male   | Low dose  | 39 weeks |
| SSAN_4   | Dog 04 | AAVMID1  | AAVMid  | XLMTM    | Male   | Mid dose  | 39 weeks |
| SSAN_10  | Dog 07 | AAVMID2  | AAVMid  | XLMTM    | Male   | Mid dose  | 41 weeks |
| SSAN_14  | Dog 11 | AAVMID3  | AAVMid  | XLMTM    | Male   | Mid dose  | 39 weeks |
| SSAN_104 | Dog 14 | AAVHIGH1 | AAVHigh | XLMTM    | Male   | High dose | 39 weeks |
| SSAN_132 | Dog 16 | AAVHIGH2 | AAVHigh | XLMTM    | Male   | High dose | 39 weeks |

| SSAN ID  | Dose (vg/kg) | vg/dg <i>Biceps</i> | vg/dg <i>Vastus</i> | <i>MTM1</i> expression <i>Biceps</i> | <i>MTM1</i> expression <i>Vastus</i> | <i>MTM1</i> mRNA tag counts <i>Biceps</i> | <i>MTM1</i> mRNA tag counts <i>Vastus</i> |
|----------|--------------|---------------------|---------------------|--------------------------------------|--------------------------------------|-------------------------------------------|-------------------------------------------|
| SSAN_2   | NA           | NA                  | NA                  | NA                                   | NA                                   | NA                                        | NA                                        |
| SSAN_12  | NA           | NA                  | NA                  | NA                                   | NA                                   | NA                                        | NA                                        |
| SSAN_9   | NA           | NA                  | NA                  | NA                                   | NA                                   | 0,00E+00                                  | 0,00E+00                                  |
| SSAN_13  | NA           | NA                  | NA                  | NA                                   | NA                                   | 0,00E+00                                  | 0,00E+00                                  |
| SSAN_16  | NA           | NA                  | NA                  | NA                                   | NA                                   | 0,00E+00                                  | 0,00E+00                                  |
| SSAN_8   | 3,00E+13     | 0,23                | 0,058               | 4,80E-03                             | 4,00E-03                             | 2,00E-01                                  | 0,00E+00                                  |
| SSAN_11  | 3,00E+13     | 0,15                | 0,24                | 2,70E-04                             | 4,60E-04                             | 0,00E+00                                  | 2,00E-01                                  |
| SSAN_18  | 3,00E+13     | 0,19                | 0,17                | 1,70E-04                             | 4,70E-04                             | 1,40E+00                                  | 1,00E-01                                  |
| SSAN_4   | 2,00E+14     | 0,82                | 0,63                | 1,90E-03                             | 6,90E-03                             | 1,20E+00                                  | 1,00E+00                                  |
| SSAN_10  | 2,00E+14     | 1,5                 | 1,1                 | 3,10E-03                             | 5,70E-03                             | 4,80E+00                                  | 6,50E+00                                  |
| SSAN_14  | 2,00E+14     | 1,9                 | 0,77                | 1,00E-02                             | 6,50E-03                             | 1,30E+00                                  | 1,20E+00                                  |
| SSAN_104 | 5,00E+14     | 3,6                 | 2,5                 | 6,10E-02                             | 3,30E-02                             | 9,60E+00                                  | 1,38E+01                                  |
| SSAN_132 | 5,00E+14     | 2,1                 | 2,7                 | 2,70E-02                             | 8,50E-02                             | 1,53E+01                                  | 1,16E+01                                  |

**Table S1:** Details of the dog colony included in this study. Injected rAAV doses are expressed as vector genomes per kilogram (vg/kg); Biodistribution values (vector genomes per diploid genomes, or vg/dg) and *MTM1* expression were determined in a previous publication; *MTM1* tag counts were computed from RNA-seq data.

Table S2: List of differentially expressed genes in the Biceps femoris muscle of untreated XLMTM dogs, compared to WT controls; logFC: base 2 logarithm of the expression fold change (XLMTM / WT).

| ensembl ID        | Gene name | logFC      | PValue    |
|-------------------|-----------|------------|-----------|
| ENSCAFG0000000097 | ERBB3     | 1.9985494  | 0.0332438 |
| ENSCAFG0000000110 | MYL6B     | 1.8797503  | 0.0002234 |
| ENSCAFG0000000124 | TIMELESS  | 1.6642717  | 0.0006016 |
| ENSCAFG0000000225 |           | 2.1282097  | 0.0154395 |
| ENSCAFG0000000282 | HECA      | -1.2301175 | 1.41E-06  |
| ENSCAFG0000000288 |           | 1.2670245  | 0.0202622 |
| ENSCAFG0000000372 | UST       | 1.1944214  | 0.0184217 |
| ENSCAFG0000000413 | MTHFD1L   | 2.3592436  | 0.0340819 |
| ENSCAFG0000000420 | CPM       | 2.2756181  | 0.005788  |
| ENSCAFG0000000448 | DDR1      | 1.6574917  | 1.82E-05  |
| ENSCAFG0000000456 | THAP2     | -1.1867888 | 0.0043387 |
| ENSCAFG0000000510 | PRR16     | 5.0845169  | 0.0003611 |
| ENSCAFG0000000523 |           | 1.7383973  | 3.97E-05  |
| ENSCAFG0000000535 | MYCT1     | -1.1354123 | 0.0451202 |
| ENSCAFG0000000561 | MIOX      | -2.6739231 | 0.0171164 |
| ENSCAFG0000000577 | TIAM2     | 2.2271125  | 0.0003346 |
| ENSCAFG0000000611 | MEGF10    | 1.0430251  | 0.0223794 |
| ENSCAFG0000000617 | DDAH2     | 1.1560715  | 0.0387498 |
| ENSCAFG0000000670 | RIMS2     | 1.1761648  | 0.0305624 |
| ENSCAFG0000000722 | ADAMTS19  | 1.7618594  | 0.0083134 |
| ENSCAFG0000000733 |           | -1.3355278 | 0.035446  |
| ENSCAFG0000000761 | ATF6B     | 1.0228041  | 0.001874  |
| ENSCAFG0000000799 | ACSL6     | -1.2224653 | 0.0373349 |
| ENSCAFG0000000886 | DSE       | 1.4838567  | 0.0161702 |
| ENSCAFG0000000903 | COL11A2   | 2.5544118  | 0.0006814 |
| ENSCAFG0000000934 | COL14A1   | 1.4646104  | 0.0428096 |
| ENSCAFG0000001007 | FBXO32    | -1.1817054 | 0.000267  |
| ENSCAFG0000001049 | PMM1      | 1.0466784  | 0.0274554 |
| ENSCAFG0000001067 | RSPO3     | 2.1888589  | 0.0153841 |
| ENSCAFG0000001085 | SLC25A48  | -1.9601675 | 0.0453536 |
| ENSCAFG0000001086 | MYC       | 1.3094711  | 0.0163336 |
| ENSCAFG0000001106 | LAMA2     | 1.4344417  | 0.0147378 |
| ENSCAFG0000001178 | COL22A1   | 7.4573344  | 0.0025803 |
| ENSCAFG0000001286 | FANCC     | -1.03245   | 0.0181054 |
| ENSCAFG0000001287 | TCP11     | -1.0920636 | 0.004375  |
| ENSCAFG0000001290 | AKR1B1    | -1.0269683 | 0.0389057 |
| ENSCAFG0000001346 | RPL3      | 1.0253515  | 0.0048694 |
| ENSCAFG0000001402 | KDEL3     | 1.4323736  | 0.00394   |
| ENSCAFG0000001426 | COPG2     | 1.045375   | 0.0014912 |
| ENSCAFG0000001450 | MEST      | 1.1179495  | 0.0186534 |
| ENSCAFG0000001531 | SMO       | 1.3277523  | 0.0002888 |
| ENSCAFG0000001533 | TSPAN33   | 1.5150165  | 0.003072  |
| ENSCAFG0000001537 | FREM1     | 1.503814   | 0.0008517 |
| ENSCAFG0000001550 | FOXRED2   | 1.2566791  | 0.0018539 |
| ENSCAFG0000001556 | KCNK17    | 1.911231   | 0.003774  |

|                    |             |            |           |
|--------------------|-------------|------------|-----------|
| ENSCAFG00000001581 | ADAMTSL1    | -1.380429  | 0.0497587 |
| ENSCAFG00000001596 | FOXP4       | 1.4087347  | 0.002101  |
| ENSCAFG00000001646 | PRUNE2      | 3.9494118  | 0.000148  |
| ENSCAFG00000001649 | GCNT1       | 1.8660306  | 0.0252955 |
| ENSCAFG00000001715 | MOB3B       | -1.0691933 | 0.0040969 |
| ENSCAFG00000001718 | LRRC4       | 1.5438732  | 0.0279787 |
| ENSCAFG00000001793 | BTBD11      | 1.5986254  | 0.0004039 |
| ENSCAFG00000001875 | CKAP4       | 1.3618483  | 0.0004823 |
| ENSCAFG00000001909 | KIF24       | 1.5888741  | 0.0191826 |
| ENSCAFG00000001921 |             | 1.0944313  | 0.0017021 |
| ENSCAFG00000001923 | DNAI1       | 2.369146   | 0.0223892 |
| ENSCAFG00000001967 | C11H9orf131 | 1.3019602  | 0.0068244 |
| ENSCAFG00000001985 |             | 1.1720133  | 0.047631  |
| ENSCAFG00000002029 | SLC25A27    | 1.7397346  | 0.0015148 |
| ENSCAFG00000002046 | GNG11       | -1.0073856 | 0.0397899 |
| ENSCAFG00000002069 | COL1A2      | 1.7595663  | 0.0230639 |
| ENSCAFG00000002079 | KDR         | -1.5741134 | 0.0044802 |
| ENSCAFG00000002124 | ASB4        | -1.0883557 | 0.026295  |
| ENSCAFG00000002313 | OGN         | 1.5683242  | 0.0495788 |
| ENSCAFG00000002319 | KIAA1211L   | 1.907257   | 0.0098455 |
| ENSCAFG00000002397 | SHB         | 1.1487295  | 0.0376851 |
| ENSCAFG00000002463 | THADA       | 1.0425448  | 0.0489215 |
| ENSCAFG00000002517 |             | 1.0618587  | 0.0029055 |
| ENSCAFG00000002549 | CCDC30      | 1.702937   | 0.014782  |
| ENSCAFG00000002645 | KCNQ5       | 1.3076355  | 0.0204323 |
| ENSCAFG00000002656 | EEF1A1      | 1.1526119  | 0.0002931 |
| ENSCAFG00000002719 |             | -1.1616372 | 0.0014733 |
| ENSCAFG00000002748 |             | 1.3142511  | 5.48E-05  |
| ENSCAFG00000002793 | IRAK1BP1    | 1.4637036  | 0.0446567 |
| ENSCAFG00000002796 | CCDC88A     | 1.2007863  | 0.0016092 |
| ENSCAFG00000002830 | RIMS3       | -3.9995339 | 1.15E-05  |
| ENSCAFG00000002854 | IGLON5      | 3.2561771  | 0.0016178 |
| ENSCAFG00000002917 | AEBP1       | 2.9819573  | 0.0001523 |
| ENSCAFG00000002927 | CCDC85A     | -1.2465901 | 0.0389786 |
| ENSCAFG00000002928 | SVEP1       | 1.6089033  | 0.0291748 |
| ENSCAFG00000002940 | FANCL       | 1.2110468  | 0.0186004 |
| ENSCAFG00000003008 | C11H9orf84  | 2.6678407  | 0.0180982 |
| ENSCAFG00000003068 | NT5C1A      | -1.1484772 | 0.0148455 |
| ENSCAFG00000003096 | PM20D2      | 2.336963   | 0.0042426 |
| ENSCAFG00000003276 | ANTXR1      | 1.0594788  | 0.0208935 |
| ENSCAFG00000003290 | THAP5       | -1.1654024 | 6.96E-06  |
| ENSCAFG00000003327 | COL27A1     | 1.4750289  | 0.0345493 |
| ENSCAFG00000003340 | AKNA        | 1.3638802  | 0.0168268 |
| ENSCAFG00000003388 | SH3D21      | 1.2546736  | 0.0042817 |
| ENSCAFG00000003415 | ODC1        | 1.3276303  | 0.0011529 |
| ENSCAFG00000003426 | TNC         | 2.2162376  | 0.0274508 |
| ENSCAFG00000003458 | MMS22L      | 1.4704712  | 0.0238038 |
| ENSCAFG00000003528 | TCAF1       | 1.2339108  | 6.77E-05  |
| ENSCAFG00000003530 |             | 1.2723109  | 0.0088103 |
| ENSCAFG00000003602 | DLGAP3      | -3.0273129 | 0.0152416 |



|                    |            |            |           |
|--------------------|------------|------------|-----------|
| ENSCAFG00000003663 | GSN        | 1.0990708  | 0.0203371 |
| ENSCAFG00000003676 |            | -1.1229354 | 0.0104563 |
| ENSCAFG00000003680 | MYLK3      | 4.1453483  | 0.0077244 |
| ENSCAFG00000003720 | NRCAM      | 3.5965642  | 0.0004244 |
| ENSCAFG00000003775 | OSR1       | 3.0713999  | 0.0013638 |
| ENSCAFG00000003804 |            | 3.7122274  | 0.0011818 |
| ENSCAFG00000003810 | PPIL6      | 1.6225708  | 0.0234597 |
| ENSCAFG00000003816 | SMPD2      | 1.7334732  | 9.75E-05  |
| ENSCAFG00000003824 | MICAL1     | 1.6120148  | 0.0015947 |
| ENSCAFG00000003941 | SPATA6     | 1.5506013  | 0.0137541 |
| ENSCAFG00000003952 | PRKAR2B    | -1.3138355 | 0.0003656 |
| ENSCAFG00000003960 | TRAF3IP2   | 1.3352398  | 0.0305248 |
| ENSCAFG00000003991 | ARHGAP42   | 1.2132886  | 0.0088559 |
| ENSCAFG00000004034 | EMP3       | 1.3421992  | 0.0049694 |
| ENSCAFG00000004094 | DLL1       | 1.2356588  | 0.0139221 |
| ENSCAFG00000004127 | SESN3      | 2.238837   | 0.0005788 |
| ENSCAFG00000004128 | BBS7       | 1.0808872  | 0.0010358 |
| ENSCAFG00000004129 | ENDOD1     | 1.2077503  | 0.0425102 |
| ENSCAFG00000004176 | PANX1      | 1.9866858  | 0.0030761 |
| ENSCAFG00000004279 | MYO3A      | 2.4560244  | 0.0122156 |
| ENSCAFG00000004297 | CCDC8      | 3.5793053  | 4.82E-08  |
| ENSCAFG00000004331 |            | 1.2700819  | 0.039599  |
| ENSCAFG00000004392 | DMPK       | 1.6211355  | 3.22E-07  |
| ENSCAFG00000004481 | SLC6A6     | 1.4696773  | 0.0151837 |
| ENSCAFG00000004492 | GRIP2      | 1.4909129  | 0.0018855 |
| ENSCAFG00000004510 | CDC42EP4   | 1.2054268  | 0.0072079 |
| ENSCAFG00000004521 | FGD5       | -1.0615834 | 0.0247926 |
| ENSCAFG00000004529 | VIM        | 1.0635385  | 0.0097079 |
| ENSCAFG00000004555 | RARRES2    | 1.3785828  | 0.013323  |
| ENSCAFG00000004589 |            | 1.4814383  | 4.41E-06  |
| ENSCAFG00000004636 | BCAM       | 1.2950915  | 0.0030819 |
| ENSCAFG00000004731 | TENM4      | 1.2159264  | 0.0150583 |
| ENSCAFG00000004746 | XRCC1      | 1.4936749  | 0.0004644 |
| ENSCAFG00000004757 | PHLDB3     | 1.4590743  | 0.0124691 |
| ENSCAFG00000004767 | CAD        | 1.0603273  | 0.025034  |
| ENSCAFG00000004769 | OPTN       | -1.3753578 | 2.56E-05  |
| ENSCAFG00000004785 | IFT122     | 1.0453382  | 0.0337815 |
| ENSCAFG00000004816 | LLGL2      | -1.3801129 | 1.34E-06  |
| ENSCAFG00000004820 | ITGA9      | 1.7450106  | 0.0118668 |
| ENSCAFG00000004856 | PROSER2    | 2.837645   | 0.0039736 |
| ENSCAFG00000004866 | USP6NL     | 1.2535465  | 0.0258327 |
| ENSCAFG00000004916 | H3F3B      | 1.0246086  | 0.0015366 |
| ENSCAFG00000004931 | PLCD1      | 1.3246758  | 0.0255963 |
| ENSCAFG00000004958 | ATP1A3     | -2.1202771 | 0.0023034 |
| ENSCAFG00000005002 | TIMP4      | -1.6479683 | 0.014841  |
| ENSCAFG00000005081 | INSIG1     | -1.2274206 | 0.0005203 |
| ENSCAFG00000005122 | ST6GALNAC2 | -1.0318111 | 0.0336524 |
| ENSCAFG00000005179 | CAPN5      | 1.1688158  | 0.0269347 |
| ENSCAFG00000005276 | AKR1C3     | -1.7824195 | 0.0250211 |
| ENSCAFG00000005286 | SPTBN4     | 1.6113971  | 0.0325019 |

|                    |           |            |           |
|--------------------|-----------|------------|-----------|
| ENSCAFG00000005294 | TK1       | 1.7790676  | 1.88E-05  |
| ENSCAFG00000005301 | PSD3      | 1.9034447  | 0.0103111 |
| ENSCAFG00000005309 | LBH       | 1.4633129  | 0.0288686 |
| ENSCAFG00000005338 | BLVRB     | 1.1160045  | 0.0155426 |
| ENSCAFG00000005348 | EHD3      | 1.9949194  | 0.0109675 |
| ENSCAFG00000005411 | OSBPL10   | 1.3275133  | 0.033281  |
| ENSCAFG00000005433 | ABCC4     | -1.0520078 | 0.0234388 |
| ENSCAFG00000005468 | PFKP      | 1.1144971  | 0.0240206 |
| ENSCAFG00000005490 | KCNE3     | -1.4390698 | 0.0313692 |
| ENSCAFG00000005505 | PGM2L1    | -2.0765818 | 0.0021838 |
| ENSCAFG00000005527 | P4HA3     | 1.6524674  | 0.0438637 |
| ENSCAFG00000005530 | ZFP36     | 1.2676883  | 0.0338014 |
| ENSCAFG00000005564 | UCP2      | 1.7294193  | 4.62E-05  |
| ENSCAFG00000005595 | FARP1     | -1.9240399 | 0.0026851 |
| ENSCAFG00000005621 | BHLHE40   | -1.6394166 | 1.37E-05  |
| ENSCAFG00000005671 | LRRC3B    | -2.2832445 | 0.0417716 |
| ENSCAFG00000005768 | FOLR2     | 1.4761881  | 0.0005574 |
| ENSCAFG00000005843 | LTBP1     | 1.3917725  | 0.001155  |
| ENSCAFG00000005870 | RASGRP3   | -1.1556743 | 0.020389  |
| ENSCAFG00000005906 | PYCR1     | 1.0372012  | 0.0499938 |
| ENSCAFG00000005918 | ITGBL1    | 1.9319822  | 0.0222555 |
| ENSCAFG00000005965 | FOXO1     | 2.0143814  | 0.0089946 |
| ENSCAFG00000006006 | FASN      | 1.2944023  | 0.001018  |
| ENSCAFG00000006019 | FREM2     | 1.8096944  | 0.0042032 |
| ENSCAFG00000006053 |           | 2.2460045  | 1.22E-06  |
| ENSCAFG00000006065 | PRNP      | 1.0685898  | 0.0233865 |
| ENSCAFG00000006073 | POSTN     | 2.2391343  | 0.0285317 |
| ENSCAFG00000006089 | SMOX      | 1.1999842  | 0.0313584 |
| ENSCAFG00000006091 | KITLG     | -1.3918214 | 0.0439853 |
| ENSCAFG00000006106 | PCDHB4    | 1.9949895  | 0.0492364 |
| ENSCAFG00000006134 | KERA      | 1.9144364  | 0.0086623 |
| ENSCAFG00000006162 | SMAD9     | 2.0206298  | 7.25E-05  |
| ENSCAFG00000006164 | CYP1B1    | 2.4875799  | 0.0150899 |
| ENSCAFG00000006175 | CDC25B    | 1.4340212  | 0.0437163 |
| ENSCAFG00000006231 | DCLK1     | 3.8517736  | 8.65E-05  |
| ENSCAFG00000006234 | ADAM33    | 1.4705508  | 0.0291379 |
| ENSCAFG00000006240 | MCF2L     | -1.1343084 | 0.0090496 |
| ENSCAFG00000006255 | NBEA      | 1.0127911  | 0.0099608 |
| ENSCAFG00000006373 |           | 1.252037   | 0.0065335 |
| ENSCAFG00000006381 | SEMA3C    | 1.5015106  | 2.65E-05  |
| ENSCAFG00000006424 | GXYLT2    | 1.9611447  | 0.0018458 |
| ENSCAFG00000006474 | PGGHG     | 1.5468268  | 0.0176196 |
| ENSCAFG00000006513 |           | -1.1631644 | 0.0337534 |
| ENSCAFG00000006560 | NCAPH     | -1.6782798 | 0.0101947 |
| ENSCAFG00000006576 | WDFY4     | 1.8083009  | 0.0084989 |
| ENSCAFG00000006582 | TMEM80    | 1.1967136  | 0.0103567 |
| ENSCAFG00000006596 | ANKS1B    | 2.2046688  | 0.0028154 |
| ENSCAFG00000006607 | DPYSL3    | 1.5482832  | 0.0003571 |
| ENSCAFG00000006660 | SLC7A1    | -1.1137345 | 0.0004671 |
| ENSCAFG00000006703 | UHRF1BP1L | 1.2006648  | 0.0254162 |

|                    |          |            |           |
|--------------------|----------|------------|-----------|
| ENSCAFG00000006723 | SYT9     | 1.305997   | 0.0136821 |
| ENSCAFG00000006788 | MTIF3    | 1.2252995  | 0.0400223 |
| ENSCAFG00000006797 |          | 1.1522907  | 0.003321  |
| ENSCAFG00000006800 | FZD10    | 2.6678761  | 3.24E-06  |
| ENSCAFG00000006801 | HSPB6    | 1.0177213  | 0.011063  |
| ENSCAFG00000006865 | PAMR1    | 2.8225838  | 0.0366888 |
| ENSCAFG00000006877 | FAM110A  | 2.131169   | 0.0026386 |
| ENSCAFG00000006909 | LMO1     | -1.0000269 | 0.0476376 |
| ENSCAFG00000007001 |          | -1.1892256 | 0.0047148 |
| ENSCAFG00000007047 | MAL      | 1.6662122  | 0.0043244 |
| ENSCAFG00000007079 |          | 1.327442   | 0.000195  |
| ENSCAFG00000007111 | LGI4     | 1.7969568  | 0.0119873 |
| ENSCAFG00000007136 | TNFRSF19 | 1.3172106  | 0.0169519 |
| ENSCAFG00000007149 | FBLN7    | 2.7991707  | 0.0020696 |
| ENSCAFG00000007246 | CYP7B1   | 1.734161   | 0.0040176 |
| ENSCAFG00000007247 | ANKRD1   | 2.6989036  | 0.0114543 |
| ENSCAFG00000007295 | SREK1IP1 | -1.1670811 | 0.0037901 |
| ENSCAFG00000007338 | NR4A1    | -1.6583959 | 0.0339885 |
| ENSCAFG00000007344 | MYBL1    | 2.3065726  | 0.0003029 |
| ENSCAFG00000007358 | KCTD15   | 1.0389654  | 0.0289894 |
| ENSCAFG00000007465 | RHPN2    | -1.1797517 | 0.0149815 |
| ENSCAFG00000007486 | CEP89    | 1.3602764  | 0.0023939 |
| ENSCAFG00000007562 | AMPD3    | 2.6718334  | 0.0020755 |
| ENSCAFG00000007635 | CLSTN2   | 2.1583657  | 0.0069246 |
| ENSCAFG00000007750 | CASP3    | 1.0988799  | 0.0003011 |
| ENSCAFG00000007770 | LNPEP    | 1.095146   | 0.0093588 |
| ENSCAFG00000007847 | TIMM10   | -1.319757  | 2.77E-05  |
| ENSCAFG00000007853 | SAP30    | -1.0310148 | 0.0051343 |
| ENSCAFG00000007893 | RBP4     | 1.9676277  | 0.0006577 |
| ENSCAFG00000007936 | ASB14    | -1.3153049 | 0.0122949 |
| ENSCAFG00000007945 | PROCR    | 2.1209574  | 4.34E-05  |
| ENSCAFG00000007985 | PLCE1    | -1.2551266 | 0.0185598 |
| ENSCAFG00000008026 |          | 3.0904792  | 0.0023537 |
| ENSCAFG00000008062 |          | -2.6542478 | 0.0033238 |
| ENSCAFG00000008123 | TENM3    | 1.0424926  | 0.036091  |
| ENSCAFG00000008164 | TMEM154  | 1.9035179  | 0.0346694 |
| ENSCAFG00000008168 | TIGD4    | 2.2436324  | 0.0183034 |
| ENSCAFG00000008178 | GDAP1    | -1.0982379 | 0.0337935 |
| ENSCAFG00000008236 |          | 1.4913865  | 0.0064784 |
| ENSCAFG00000008288 | GPD1     | -1.0214588 | 0.0321299 |
| ENSCAFG00000008295 | BTG3     | 1.8138395  | 8.55E-05  |
| ENSCAFG00000008309 |          | -1.1472547 | 0.0013701 |
| ENSCAFG00000008319 | CHODL    | 2.0231766  | 0.0014243 |
| ENSCAFG00000008333 | TMEM161B | -1.0084087 | 0.0001793 |
| ENSCAFG00000008353 | SFRP2    | 3.748625   | 0.0208011 |
| ENSCAFG00000008418 | NCAM2    | 1.7019764  | 0.0121552 |
| ENSCAFG00000008477 | BLNK     | -1.181329  | 0.0180735 |
| ENSCAFG00000008519 | RTKN     | 1.3820235  | 0.0070425 |
| ENSCAFG00000008582 | VCAN     | 1.6419977  | 0.0260995 |
| ENSCAFG00000008597 | ANGPT2   | -1.8793916 | 0.0019207 |

|                    |             |            |           |
|--------------------|-------------|------------|-----------|
| ENSCAFG00000008640 | TUBA1B      | 1.419475   | 0.0022979 |
| ENSCAFG00000008661 |             | 1.3778535  | 0.0013452 |
| ENSCAFG00000008707 | CKMT2       | -1.2174245 | 0.0028461 |
| ENSCAFG00000008755 | SRC         | 1.5829432  | 0.0194801 |
| ENSCAFG00000008786 | NNAT        | 1.8604092  | 0.0003864 |
| ENSCAFG00000008795 | FKBP11      | 1.0520454  | 0.0209391 |
| ENSCAFG00000008830 | TRAFD1      | 1.0914067  | 0.0091799 |
| ENSCAFG00000008847 | KRTAP11-1   | 6.1451797  | 0.0022926 |
| ENSCAFG00000008860 | PAQR3       | -1.2955411 | 0.0305646 |
| ENSCAFG00000008898 | PRKG2       | 1.8261599  | 0.0065544 |
| ENSCAFG00000008942 | C18H11orf49 | 2.1313221  | 0.0014805 |
| ENSCAFG00000008975 | THBS4       | 1.6809482  | 0.0054384 |
| ENSCAFG00000008977 | LRP4        | 1.6413104  | 0.0054414 |
| ENSCAFG00000008978 | EVA1C       | 2.3088181  | 0.0058465 |
| ENSCAFG00000009005 | CYP26B1     | 4.7051139  | 4.05E-05  |
| ENSCAFG00000009017 | PPP1R16B    | -1.6980186 | 0.0096029 |
| ENSCAFG00000009022 | TMEM64      | 1.2981223  | 0.014941  |
| ENSCAFG00000009061 | SLC8B1      | 1.0017663  | 0.0408296 |
| ENSCAFG00000009066 | MYOD1       | 1.2792955  | 0.0177768 |
| ENSCAFG00000009076 | PLBD2       | 1.7185704  | 0.0087959 |
| ENSCAFG00000009096 | LXN         | 1.0015599  | 0.0260509 |
| ENSCAFG00000009097 | SDSL        | 2.9901595  | 0.0026625 |
| ENSCAFG00000009104 | STC1        | 1.5147805  | 0.0179325 |
| ENSCAFG00000009105 | FAM92A      | 2.0433652  | 0.0018501 |
| ENSCAFG00000009149 | SMIM4       | -1.0919755 | 0.0096576 |
| ENSCAFG00000009187 | LOXL2       | 1.4560932  | 0.0462805 |
| ENSCAFG00000009214 | DCBLD2      | 1.1738957  | 0.0011786 |
| ENSCAFG00000009286 | SLC38A1     | -1.1527532 | 0.0015299 |
| ENSCAFG00000009329 | PDLIM2      | 1.9559681  | 0.0124188 |
| ENSCAFG00000009333 | CES1        | -3.4388203 | 0.0018738 |
| ENSCAFG00000009337 | TUBB2A      | 3.3410081  | 1.38E-06  |
| ENSCAFG00000009363 | MAPK8IP1    | 1.2391063  | 0.0184794 |
| ENSCAFG00000009389 | NISCH       | 1.1586874  | 0.0031181 |
| ENSCAFG00000009398 | MSTN        | -3.164984  | 0.0339283 |
| ENSCAFG00000009414 | CHAC1       | 7.599053   | 0.0002984 |
| ENSCAFG00000009441 | CD82        | 1.7353972  | 0.0096871 |
| ENSCAFG00000009486 | RPGRIP1L    | 1.126024   | 0.0351896 |
| ENSCAFG00000009506 | ABI3BP      | 1.5258207  | 0.0405543 |
| ENSCAFG00000009510 | EXD1        | 1.5941081  | 0.0003677 |
| ENSCAFG00000009569 | SPP1        | -4.323991  | 0.0043623 |
| ENSCAFG00000009596 | RUNX1       | 2.8815053  | 0.0005218 |
| ENSCAFG00000009632 | TYRO3       | 2.0040869  | 0.0001808 |
| ENSCAFG00000009638 | ABCG2       | 1.6343402  | 0.0321226 |
| ENSCAFG00000009649 | PLEKHA6     | 1.5979977  | 0.033564  |
| ENSCAFG00000009653 | DOP1B       | 1.2841788  | 0.023787  |
| ENSCAFG00000009659 | HR          | 2.7208764  | 0.003756  |
| ENSCAFG00000009664 | MATN4       | 2.6985028  | 0.0323803 |
| ENSCAFG00000009673 |             | -1.3696139 | 0.0042723 |
| ENSCAFG00000009675 | LRRN2       | 1.5723657  | 0.0488991 |
| ENSCAFG00000009721 | ALCAM       | 1.5618096  | 0.0057404 |

|                    |          |            |           |
|--------------------|----------|------------|-----------|
| ENSCAFG0000009765  | CASQ2    | 1.5114943  | 0.0019356 |
| ENSCAFG0000009777  | NAV2     | 1.5776233  | 0.0001726 |
| ENSCAFG0000009869  | EHD4     | 1.2162919  | 0.0018567 |
| ENSCAFG0000009951  | SPAG17   | 4.4146001  | 0.0046066 |
| ENSCAFG0000009972  | ADAMTS8  | 3.6585067  | 0.0298222 |
| ENSCAFG0000009978  | ETS2     | 1.8766081  | 7.08E-05  |
| ENSCAFG00000010077 | LSP1     | 1.0056485  | 0.0163783 |
| ENSCAFG00000010090 | IGF2     | 3.2596448  | 6.39E-07  |
| ENSCAFG00000010121 | CD81     | 1.4512175  | 7.66E-05  |
| ENSCAFG00000010142 | SLC39A10 | 1.0400604  | 0.0299879 |
| ENSCAFG00000010144 | ELK4     | -1.0067964 | 0.0226801 |
| ENSCAFG00000010148 | SLC45A3  | 1.8067576  | 0.0303809 |
| ENSCAFG00000010175 | CDH22    | -2.4595502 | 0.0016223 |
| ENSCAFG00000010186 | RAB29    | -1.2470001 | 0.0005853 |
| ENSCAFG00000010225 | PHKB     | -1.0820698 | 0.0010003 |
| ENSCAFG00000010239 | IKBKE    | 1.2959729  | 0.0060096 |
| ENSCAFG00000010274 | CHI3L1   | 5.7851446  | 6.00E-06  |
| ENSCAFG00000010285 | ABCG1    | 4.4374559  | 0.0015662 |
| ENSCAFG00000010288 | MYBPH    | 3.5261957  | 0.0001335 |
| ENSCAFG00000010298 | ADORA1   | 4.1882323  | 1.99E-07  |
| ENSCAFG00000010309 | MYOG     | 1.845086   | 0.0002147 |
| ENSCAFG00000010395 | ADAMTS16 | 4.4817655  | 6.24E-06  |
| ENSCAFG00000010408 | MLEC     | -1.039298  | 0.0176709 |
| ENSCAFG00000010423 | COL4A4   | 2.2444751  | 0.0217273 |
| ENSCAFG00000010432 | TIRAP    | -1.0758181 | 0.0350677 |
| ENSCAFG00000010496 | YARS2    | -1.0233588 | 0.0025834 |
| ENSCAFG00000010499 | CDON     | 1.1667513  | 0.0122247 |
| ENSCAFG00000010581 | CYB561D2 | 1.3088232  | 0.014197  |
| ENSCAFG00000010588 | MARCKSL1 | 2.7707109  | 0.0023246 |
| ENSCAFG00000010593 | GSTO1    | 1.3344276  | 0.0104336 |
| ENSCAFG00000010619 | BICD1    | 2.649061   | 4.59E-05  |
| ENSCAFG00000010652 | STK17B   | 1.1842598  | 0.0356781 |
| ENSCAFG00000010654 | AGPAT3   | -1.5393306 | 0.0005408 |
| ENSCAFG00000010698 | LTO1     | -1.0143746 | 0.0090374 |
| ENSCAFG00000010716 | TPCN2    | 1.1272684  | 0.043151  |
| ENSCAFG00000010790 | SLC9B1   | 4.0642172  | 0.0005452 |
| ENSCAFG00000010815 | TGFB2    | 2.2452102  | 1.75E-06  |
| ENSCAFG00000010823 | ZBTB20   | 1.5619384  | 0.0043654 |
| ENSCAFG00000010825 |          | 4.0140832  | 0.0084377 |
| ENSCAFG00000010874 | SULF2    | -1.5770631 | 0.0281543 |
| ENSCAFG00000010883 | FMO5     | -1.3040493 | 0.0009988 |
| ENSCAFG00000010925 | HFE      | 2.0423876  | 1.27E-06  |
| ENSCAFG00000010936 | NPNT     | 3.5606977  | 2.55E-06  |
| ENSCAFG00000010982 | FAM20A   | 1.620957   | 0.0408181 |
| ENSCAFG00000011067 | DHRX     | -1.0921928 | 0.000296  |
| ENSCAFG00000011069 | GJA5     | -1.5652421 | 0.00623   |
| ENSCAFG00000011086 | SLC16A6  | 3.1290211  | 0.0007078 |
| ENSCAFG00000011107 | STK32C   | -1.3005556 | 0.0241408 |
| ENSCAFG00000011166 |          | -1.0829869 | 0.016809  |
| ENSCAFG00000011218 |          | 1.4517993  | 0.0196666 |

|                    |            |            |           |
|--------------------|------------|------------|-----------|
| ENSCAFG00000011283 | CHRND      | 3.5588582  | 0.0008666 |
| ENSCAFG00000011330 | NEK7       | -1.0911281 | 2.14E-05  |
| ENSCAFG00000011336 | MARC1      | -1.5080368 | 0.0101459 |
| ENSCAFG00000011348 | AFAP1L2    | 1.4361807  | 0.0069577 |
| ENSCAFG00000011378 | ANKRD34A   | 2.5022911  | 0.0161449 |
| ENSCAFG00000011426 | PTGIS      | 1.6365529  | 0.0078697 |
| ENSCAFG00000011428 | KRAS       | -1.0043451 | 0.0109602 |
| ENSCAFG00000011458 | LRMP       | 2.4578377  | 0.0126301 |
| ENSCAFG00000011477 | BSN        | 2.5773378  | 0.0037533 |
| ENSCAFG00000011498 | SGSM1      | 2.4600022  | 0.0008814 |
| ENSCAFG00000011542 | HAPLN3     | 1.6162553  | 0.0423641 |
| ENSCAFG00000011605 | EFS        | 1.9837756  | 1.07E-05  |
| ENSCAFG00000011646 | ZFHX2      | 1.7450498  | 0.0124095 |
| ENSCAFG00000011652 | MTMR11     | 1.700243   | 0.0052361 |
| ENSCAFG00000011682 | XIRP2      | 1.3134881  | 0.0092161 |
| ENSCAFG00000011744 | LAMB2      | 1.4917481  | 6.01E-05  |
| ENSCAFG00000011745 | SORL1      | 1.2493712  | 0.0385312 |
| ENSCAFG00000011817 | COL18A1    | 1.0466518  | 0.0480526 |
| ENSCAFG00000011823 | MN1        | 1.4931132  | 0.001027  |
| ENSCAFG00000011921 | ASB11      | -1.0674039 | 0.0032952 |
| ENSCAFG00000011930 | CCNDBP1    | -1.1206306 | 0.0007448 |
| ENSCAFG00000011960 | C4H1orf198 | 1.0904987  | 0.0231915 |
| ENSCAFG00000011964 | GCNT7      | 1.4583412  | 0.0391818 |
| ENSCAFG00000011974 | EPB42      | -1.2027071 | 0.0016859 |
| ENSCAFG00000011977 | KIF7       | 2.0208166  | 0.0001534 |
| ENSCAFG00000012022 |            | 1.9845705  | 0.000157  |
| ENSCAFG00000012039 | ZNF710     | 1.2893167  | 0.0385898 |
| ENSCAFG00000012046 | IFI6       | 2.2650207  | 0.0034025 |
| ENSCAFG00000012095 | AHDC1      | 1.1151061  | 6.09E-05  |
| ENSCAFG00000012152 | GABBR1     | 1.1737669  | 0.0289307 |
| ENSCAFG00000012175 | SLC26A6    | -1.6185167 | 0.0010282 |
| ENSCAFG00000012222 |            | 1.2385832  | 0.001716  |
| ENSCAFG00000012376 | VASH2      | 2.1323489  | 0.0029083 |
| ENSCAFG00000012428 | HES6       | 2.0126644  | 0.0210662 |
| ENSCAFG00000012432 | MYOZ2      | 1.6092946  | 0.0394641 |
| ENSCAFG00000012493 | PFKFB4     | -1.7922405 | 0.0243999 |
| ENSCAFG00000012525 | MUC13      | 4.2271254  | 3.81E-05  |
| ENSCAFG00000012556 | HTRA1      | 1.560124   | 0.0017622 |
| ENSCAFG00000012742 | MTFP1      | -1.5381091 | 0.0029954 |
| ENSCAFG00000012803 | RIN1       | 3.4011473  | 4.51E-07  |
| ENSCAFG00000012805 | SLC25A12   | -1.1238026 | 0.017736  |
| ENSCAFG00000012824 | SCN4B      | -1.5043535 | 0.0112979 |
| ENSCAFG00000012834 | SLC35E4    | 1.3974836  | 0.0002253 |
| ENSCAFG00000012860 | RAPH1      | 1.2051238  | 0.0024533 |
| ENSCAFG00000012904 | CDK1       | 1.86909    | 0.0303179 |
| ENSCAFG00000012925 | PHKA2      | 1.307548   | 0.0454466 |
| ENSCAFG00000012963 |            | 2.646114   | 0.0005253 |
| ENSCAFG00000012979 | CABCOCO1   | -1.0147807 | 0.0444818 |
| ENSCAFG00000013006 | ITGA6      | -1.0897465 | 0.0499311 |
| ENSCAFG00000013020 | STMN3      | 1.7524345  | 0.0090174 |

|                    |          |            |           |
|--------------------|----------|------------|-----------|
| ENSCAFG00000013030 | PDHA1    | -1.2582977 | 0.0064577 |
| ENSCAFG00000013042 | MYOM3    | 1.4743933  | 0.0107657 |
| ENSCAFG00000013098 | ZNF750   | -1.956704  | 0.0054493 |
| ENSCAFG00000013195 | EFEMP2   | 1.5427688  | 0.0004771 |
| ENSCAFG00000013198 | FAM234B  | 1.0223832  | 0.0104746 |
| ENSCAFG00000013199 |          | 1.0030748  | 0.0475596 |
| ENSCAFG00000013260 | KLHL34   | 1.1853515  | 0.0382216 |
| ENSCAFG00000013283 | CHRNA1   | 2.9606093  | 6.85E-06  |
| ENSCAFG00000013367 | HIP1     | 1.4075213  | 1.33E-06  |
| ENSCAFG00000013423 | FUOM     | -1.0463725 | 0.0446137 |
| ENSCAFG00000013483 | TMEM120A | -1.0259625 | 0.045893  |
| ENSCAFG00000013489 | UCK2     | 1.4569271  | 0.0002208 |
| ENSCAFG00000013500 | LTBP3    | 1.6657797  | 1.25E-05  |
| ENSCAFG00000013521 | POLA1    | 1.0773683  | 0.0009952 |
| ENSCAFG00000013544 | HSPB1    | 1.0103984  | 0.0017707 |
| ENSCAFG00000013600 | PTH1R    | 1.904094   | 0.0158524 |
| ENSCAFG00000013627 | HHIPL2   | -1.4953735 | 0.0344696 |
| ENSCAFG00000013723 | SHF      | 2.4715009  | 0.0493235 |
| ENSCAFG00000013728 | MYL4     | 1.7469811  | 0.0369631 |
| ENSCAFG00000013735 | ITGB3    | 1.3294749  | 0.0442336 |
| ENSCAFG00000013765 | MYL10    | 1.7510174  | 0.0295485 |
| ENSCAFG00000013778 | PLA2G4A  | 1.1835954  | 0.0441095 |
| ENSCAFG00000013819 | FMNL1    | 1.1166418  | 0.0161139 |
| ENSCAFG00000013844 | NCAM1    | 2.9879962  | 0.0014817 |
| ENSCAFG00000013874 | CXCR6    | -1.5894894 | 0.0050372 |
| ENSCAFG00000013904 | BCL6     | 1.1057104  | 0.0013396 |
| ENSCAFG00000013909 | SERPINE1 | 2.1188311  | 0.006915  |
| ENSCAFG00000013990 |          | 1.0084104  | 0.0189195 |
| ENSCAFG00000014016 | DLAT     | -1.3390803 | 0.0038942 |
| ENSCAFG00000014025 | TTN      | 1.4445079  | 0.0119511 |
| ENSCAFG00000014049 | CLEC3B   | 1.4917439  | 0.0312897 |
| ENSCAFG00000014054 | ACHE     | 1.7101293  | 0.048664  |
| ENSCAFG00000014120 |          | 1.0228138  | 0.0055869 |
| ENSCAFG00000014124 | CHCHD10  | -1.3405629 | 0.0016796 |
| ENSCAFG00000014170 | GMIP     | 1.0059172  | 0.0478879 |
| ENSCAFG00000014237 | L2HGDH   | -1.5465101 | 0.0003665 |
| ENSCAFG00000014308 | ALAS2    | 1.5514593  | 0.0001249 |
| ENSCAFG00000014310 | APEX2    | 1.5301556  | 0.0001018 |
| ENSCAFG00000014343 | SAP25    | 3.4013529  | 0.0133023 |
| ENSCAFG00000014410 | CHST3    | 1.1087675  | 0.0296418 |
| ENSCAFG00000014443 | TSC22D4  | 1.3023706  | 1.30E-05  |
| ENSCAFG00000014448 | ZNF804A  | 2.8298813  | 0.0001171 |
| ENSCAFG00000014451 | MAOB     | -4.1786538 | 4.33E-07  |
| ENSCAFG00000014453 | AFAP1    | 1.0634352  | 0.0181045 |
| ENSCAFG00000014474 | IGFBP5   | 2.0624697  | 0.0058444 |
| ENSCAFG00000014490 | IGFBP2   | 4.0896174  | 0.0028689 |
| ENSCAFG00000014529 | CENPL    | 1.4391555  | 0.0116044 |
| ENSCAFG00000014551 | GAL3ST4  | 1.7826514  | 0.0234653 |
| ENSCAFG00000014582 | SERPINI1 | 2.8793334  | 9.01E-06  |
| ENSCAFG00000014627 |          | 1.1761091  | 0.0041188 |

|                    |             |            |           |
|--------------------|-------------|------------|-----------|
| ENSCAFG00000014777 | RCOR2       | 2.0924226  | 0.0064773 |
| ENSCAFG00000014812 | COL3A1      | 1.7284213  | 0.0230001 |
| ENSCAFG00000014835 | USP54       | 1.4163658  | 0.0445425 |
| ENSCAFG00000014923 | FGF7        | 2.8722276  | 0.0068474 |
| ENSCAFG00000014968 |             | 1.5405599  | 1.72E-06  |
| ENSCAFG00000014978 |             | 1.5139895  | 0.0001429 |
| ENSCAFG00000015013 | LGALS3      | 1.4125828  | 0.0318277 |
| ENSCAFG00000015027 | METTL11B    | -2.0559084 | 0.0107291 |
| ENSCAFG00000015078 | FAM184B     | 2.424281   | 0.0008864 |
| ENSCAFG00000015196 | SCNN1A      | 1.5036275  | 0.0333578 |
| ENSCAFG00000015209 | TUBA4A      | -1.5157688 | 0.0215853 |
| ENSCAFG00000015217 |             | -1.6895544 | 0.0139284 |
| ENSCAFG00000015235 | SLC19A2     | -1.0788877 | 0.0153086 |
| ENSCAFG00000015256 | FAM129C     | -1.200929  | 0.029636  |
| ENSCAFG00000015326 | SLC38A5     | 1.9879507  | 0.0034427 |
| ENSCAFG00000015345 | CC2D2A      | 1.0004909  | 0.0264898 |
| ENSCAFG00000015372 | CPEB2       | -1.0892319 | 0.0116984 |
| ENSCAFG00000015455 | ECT2        | 1.4983674  | 0.0064693 |
| ENSCAFG00000015484 | WSCD1       | -2.1157461 | 0.0063044 |
| ENSCAFG00000015539 | PAX7        | 1.4949196  | 0.0151456 |
| ENSCAFG00000015550 |             | 1.6064299  | 0.0060471 |
| ENSCAFG00000015618 | TULP3       | 1.2051253  | 0.0050993 |
| ENSCAFG00000015625 | FMN2        | 1.671686   | 0.0177983 |
| ENSCAFG00000015691 | C20H19orf44 | 1.0848136  | 0.0277254 |
| ENSCAFG00000015731 | ZNF385C     | 2.7184383  | 0.0043604 |
| ENSCAFG00000015788 | B4GALNT3    | 2.3258458  | 0.0246481 |
| ENSCAFG00000015856 |             | 1.5768267  | 0.000532  |
| ENSCAFG00000015902 | P3H4        | 1.3775296  | 0.0185076 |
| ENSCAFG00000015903 |             | 1.065626   | 0.0073049 |
| ENSCAFG00000015918 | RAB31L1     | 1.3988076  | 0.0213654 |
| ENSCAFG00000015920 | HAP1        | 5.9189062  | 0.0001631 |
| ENSCAFG00000015936 | EPHA4       | -1.7754173 | 0.0084408 |
| ENSCAFG00000015939 | CPLANE2     | 1.3462585  | 0.0062097 |
| ENSCAFG00000016036 |             | 7.3382519  | 0.0153119 |
| ENSCAFG00000016072 |             | 1.6673666  | 0.0149674 |
| ENSCAFG00000016192 | SDK1        | 1.5816064  | 0.028572  |
| ENSCAFG00000016257 | MCC         | -1.4720147 | 0.0037506 |
| ENSCAFG00000016265 | RELL1       | 1.0405075  | 0.0309604 |
| ENSCAFG00000016338 | KAZN        | 2.1394648  | 0.0024173 |
| ENSCAFG00000016342 | PCDH7       | 1.3317898  | 0.0234205 |
| ENSCAFG00000016356 |             | 1.1123007  | 0.0302976 |
| ENSCAFG00000016402 | SEL1L3      | 1.5970157  | 0.0252012 |
| ENSCAFG00000016423 | PIGH        | -1.1379221 | 0.0015057 |
| ENSCAFG00000016465 | MAGED2      | 1.0708573  | 0.0069458 |
| ENSCAFG00000016479 | TMEM184A    | -2.8310203 | 0.0019848 |
| ENSCAFG00000016550 | ASB12       | -1.1813558 | 0.0338087 |
| ENSCAFG00000016615 | MRI1        | 1.1243049  | 0.0157275 |
| ENSCAFG00000016679 | MAP3K9      | -2.1018381 | 1.37E-05  |
| ENSCAFG00000016710 | TMEM175     | -1.0239274 | 1.06E-05  |
| ENSCAFG00000016736 | FBXL19      | 1.5250898  | 0.0193548 |



|                    |         |            |           |
|--------------------|---------|------------|-----------|
| ENSCAFG00000016755 | CRABP2  | 3.4061132  | 0.0001938 |
| ENSCAFG00000016769 | NES     | 1.5885783  | 0.0001854 |
| ENSCAFG00000016811 | RHBG    | -1.2139594 | 0.0390907 |
| ENSCAFG00000016828 | COPZ2   | 1.55606    | 9.93E-05  |
| ENSCAFG00000017018 | COL1A1  | 2.1820931  | 0.0051535 |
| ENSCAFG00000017024 | ZC2HC1C | -1.0476075 | 0.004418  |
| ENSCAFG00000017033 | EME1    | 1.531999   | 0.0211695 |
| ENSCAFG00000017050 | ACSF2   | 1.4978868  | 0.0309289 |
| ENSCAFG00000017080 | EPN3    | 1.6601416  | 0.0087207 |
| ENSCAFG00000017112 | SPG21   | 1.0279531  | 0.0008303 |
| ENSCAFG00000017125 |         | -1.4548424 | 0.0059763 |
| ENSCAFG00000017157 | HDAC8   | 1.0553816  | 0.0005174 |
| ENSCAFG00000017160 | IGDCC4  | 1.1793074  | 0.0014497 |
| ENSCAFG00000017262 | MYH10   | 1.7261126  | 0.0236976 |
| ENSCAFG00000017326 |         | 2.7536982  | 0.0293583 |
| ENSCAFG00000017329 | FLRT2   | 1.2105097  | 0.0025166 |
| ENSCAFG00000017397 | ZNF711  | 2.0527961  | 0.0007113 |
| ENSCAFG00000017428 | SWSAP1  | 1.792016   | 0.0207625 |
| ENSCAFG00000017478 | TTC8    | 1.1792995  | 0.0118093 |
| ENSCAFG00000017484 | CYFIP2  | 1.4170584  | 0.0264051 |
| ENSCAFG00000017493 | TSPOAP1 | 1.1371426  | 0.0311239 |
| ENSCAFG00000017550 | S100A4  | 2.1240684  | 0.0358078 |
| ENSCAFG00000017553 | S100A6  | 1.5117525  | 0.0044401 |
| ENSCAFG00000017557 | S100A8  | 2.6007141  | 0.0045293 |
| ENSCAFG00000017575 | MYH4    | -1.7587674 | 0.0357635 |
| ENSCAFG00000017612 | ASB2    | -1.1992848 | 0.0001212 |
| ENSCAFG00000017615 | ST8SIA5 | -1.110632  | 0.0058133 |
| ENSCAFG00000017616 | LARP6   | 1.6476799  | 0.0141807 |
| ENSCAFG00000017623 | LRRC49  | 1.5510622  | 0.0235205 |
| ENSCAFG00000017655 |         | -1.2403254 | 0.0147905 |
| ENSCAFG00000017702 | ARMCX6  | 2.1443514  | 6.07E-05  |
| ENSCAFG00000017705 | ARMCX2  | 2.4298609  | 5.15E-05  |
| ENSCAFG00000017774 | ARMCX5  | 1.2952388  | 0.0193136 |
| ENSCAFG00000017820 | CD276   | 1.2141377  | 0.0053039 |
| ENSCAFG00000017823 |         | -1.3003938 | 0.0168346 |
| ENSCAFG00000017883 | NRK     | 5.0184123  | 3.84E-05  |
| ENSCAFG00000017889 | EVL     | 1.0430067  | 0.0034213 |
| ENSCAFG00000017931 | RNF128  | -1.5185238 | 0.0010198 |
| ENSCAFG00000017937 | CYP1A1  | -3.905976  | 0.0006994 |
| ENSCAFG00000018005 | MAN2C1  | 1.091192   | 0.0006648 |
| ENSCAFG00000018017 | RNF138  | -1.0593869 | 0.0255011 |
| ENSCAFG00000018020 | COL4A5  | 2.1538485  | 0.0178569 |
| ENSCAFG00000018027 | GPRC5B  | -1.3592749 | 1.75E-05  |
| ENSCAFG00000018047 |         | 2.4537473  | 0.0013029 |
| ENSCAFG00000018051 | DSG2    | 1.0198546  | 0.0496081 |
| ENSCAFG00000018125 | AQP4    | -2.2918826 | 0.0138088 |
| ENSCAFG00000018127 | TMC7    | 1.3249101  | 0.039771  |
| ENSCAFG00000018173 | LAMA3   | -1.2667093 | 0.0360097 |
| ENSCAFG00000018175 | CAPN6   | 2.1028427  | 3.67E-06  |
| ENSCAFG00000018194 |         | 2.008607   | 0.0026407 |

|                    |          |            |           |
|--------------------|----------|------------|-----------|
| ENSCAFG00000018272 | KLHL13   | 1.0241092  | 0.0180757 |
| ENSCAFG00000018277 |          | 2.127095   | 0.002478  |
| ENSCAFG00000018314 | CD209    | 2.5268014  | 0.0160053 |
| ENSCAFG00000018360 |          | 4.5329804  | 9.56E-05  |
| ENSCAFG00000018405 | FST      | 2.4748204  | 0.0012487 |
| ENSCAFG00000018415 | MOCS2    | -1.0281283 | 0.0311253 |
| ENSCAFG00000018457 | NT5M     | -1.9198135 | 0.0039645 |
| ENSCAFG00000018511 |          | 1.2177671  | 0.0498374 |
| ENSCAFG00000018560 | MYH11    | 1.9569557  | 0.0313494 |
| ENSCAFG00000018576 | NIM1K    | -3.6134555 | 0.0314474 |
| ENSCAFG00000018586 |          | 1.1431839  | 0.0023519 |
| ENSCAFG00000018602 | SH2D3A   | -1.512252  | 0.0362645 |
| ENSCAFG00000018621 | CACHD1   | 1.4397581  | 0.0034935 |
| ENSCAFG00000018629 | WSB1     | 1.0999997  | 0.0083139 |
| ENSCAFG00000018643 | SLC25A23 | 2.1966473  | 0.0015464 |
| ENSCAFG00000018661 | LIFR     | -1.2735578 | 0.0095799 |
| ENSCAFG00000018670 | PGM1     | -1.1011143 | 0.0283704 |
| ENSCAFG00000018673 | SMARCA1  | 1.0045601  | 0.0019892 |
| ENSCAFG00000018702 | EFCAB7   | -2.4450627 | 0.0003251 |
| ENSCAFG00000018704 | SLC1A3   | -1.8758384 | 0.0117275 |
| ENSCAFG00000018761 | PIEZO2   | 2.0808526  | 0.0480345 |
| ENSCAFG00000018785 | ARHGAP36 | 2.1698577  | 0.0347071 |
| ENSCAFG00000018825 |          | 2.3704429  | 0.0029332 |
| ENSCAFG00000018832 | TUBB6    | 1.0036915  | 0.0087306 |
| ENSCAFG00000018864 | GPC3     | 2.0093935  | 0.0159679 |
| ENSCAFG00000018873 |          | -1.3988726 | 0.0304302 |
| ENSCAFG00000018959 | EMP2     | 1.1732602  | 0.0012158 |
| ENSCAFG00000018982 | MYO5B    | -1.5390049 | 0.0131695 |
| ENSCAFG00000019014 | SEMA6B   | 2.0486197  | 0.0005613 |
| ENSCAFG00000019132 | RPH3AL   | -1.331736  | 0.0394341 |
| ENSCAFG00000019134 | PPL      | 1.3445513  | 0.0350349 |
| ENSCAFG00000019166 | ROGDI    | -2.2268224 | 0.0014886 |
| ENSCAFG00000019176 | ZNF185   | 1.6260798  | 0.0483279 |
| ENSCAFG00000019177 | SLC1A7   | 1.3475283  | 0.0410859 |
| ENSCAFG00000019183 | PODN     | 1.1923539  | 0.0428267 |
| ENSCAFG00000019189 | BGN      | 2.3303051  | 0.001354  |
| ENSCAFG00000019230 | ATP2B3   | 1.7097685  | 0.0488578 |
| ENSCAFG00000019242 | PNCK     | -2.0762739 | 0.0240895 |
| ENSCAFG00000019377 | CAMKK1   | 2.1178586  | 0.0004866 |
| ENSCAFG00000019401 | PGP      | -1.0041762 | 0.0003175 |
| ENSCAFG00000019479 |          | 1.1048443  | 0.0226916 |
| ENSCAFG00000019489 | TP73     | 2.5996216  | 0.0011885 |
| ENSCAFG00000019541 | TRAF2    | 1.1306474  | 0.0010248 |
| ENSCAFG00000019601 | SOX8     | 2.508841   | 6.49E-05  |
| ENSCAFG00000019662 | PIGQ     | 1.3793072  | 0.0073281 |
| ENSCAFG00000019694 | GPSM1    | 1.7453234  | 0.0001708 |
| ENSCAFG00000019698 | PALM     | 1.0935731  | 0.0160607 |
| ENSCAFG00000019714 | SLC2A5   | 3.0560386  | 0.0366847 |
| ENSCAFG00000019719 | TPGS1    | 1.0672361  | 0.0123473 |
| ENSCAFG00000019729 | MIER2    | 1.0058426  | 0.0075446 |

|                    |              |            |           |
|--------------------|--------------|------------|-----------|
| ENSCAFG00000019764 | DENND2D      | -1.1679023 | 0.0347351 |
| ENSCAFG00000019794 | SARDH        | 1.6664619  | 0.0058041 |
| ENSCAFG00000019837 | MYBPHL       | -2.4319198 | 0.0120532 |
| ENSCAFG00000019848 | COL5A1       | 1.5319236  | 0.0149272 |
| ENSCAFG00000019852 | CBFA2T3      | 1.7435625  | 3.81E-05  |
| ENSCAFG00000019902 | RAPGEF1      | -1.0223041 | 0.0001979 |
| ENSCAFG00000019914 |              | -1.1392902 | 0.0206516 |
| ENSCAFG00000019956 | WFDC1        | 2.0840362  | 0.0128731 |
| ENSCAFG00000019964 | DNAAF1       | -2.5300487 | 0.0161126 |
| ENSCAFG00000019998 | SLC30A7      | 1.3465529  | 0.0144063 |
| ENSCAFG00000020004 | VCAM1        | 1.4868283  | 0.0086088 |
| ENSCAFG00000020024 | DYNLRB2      | 2.0593855  | 0.0218078 |
| ENSCAFG00000020110 | F3           | 1.3966068  | 0.0252582 |
| ENSCAFG00000020133 | BCAR3        | 1.383005   | 0.0032513 |
| ENSCAFG00000020144 | FUK          | 1.0334578  | 0.0039397 |
| ENSCAFG00000020145 |              | -1.4896673 | 0.0291662 |
| ENSCAFG00000020153 | MTSS1L       | 1.5078105  | 0.0005418 |
| ENSCAFG00000020166 | ANGPTL2      | 2.6370734  | 3.37E-08  |
| ENSCAFG00000020256 | ODF2L        | 1.4931876  | 0.0062113 |
| ENSCAFG00000020270 | COL24A1      | 3.3611464  | 0.0003387 |
| ENSCAFG00000020294 | HAS3         | -2.180502  | 0.0047527 |
| ENSCAFG00000020304 | SSX2IP       | 1.3445015  | 0.0003108 |
| ENSCAFG00000020345 | PTGFR        | -2.7532282 | 0.0023044 |
| ENSCAFG00000020413 | CDH5         | -1.3855965 | 0.026379  |
| ENSCAFG00000020633 | cfa-mir-133a | 1.1614569  | 0.0034251 |
| ENSCAFG00000020713 | RF00279      | -1.6847085 | 0.0003797 |
| ENSCAFG00000021575 | RF00100      | 4.0455491  | 0.0071943 |
| ENSCAFG00000021919 | RF00100      | 4.2425627  | 0.0022207 |
| ENSCAFG00000021953 | RF00100      | 3.8509152  | 0.0066893 |
| ENSCAFG00000022010 | RF00100      | 4.0197572  | 0.0022227 |
| ENSCAFG00000022297 | RF00012      | 2.9367081  | 0.0100984 |
| ENSCAFG00000022574 | RF00100      | 4.6652664  | 0.0021845 |
| ENSCAFG00000022720 |              | 1.4363181  | 0.0103548 |
| ENSCAFG00000022721 |              | 1.3919904  | 0.0212696 |
| ENSCAFG00000022843 | MIR675       | 3.9588961  | 3.01E-05  |
| ENSCAFG00000023022 |              | -1.2549395 | 0.0068233 |
| ENSCAFG00000023094 | MYH3         | 1.7453169  | 0.0001939 |
| ENSCAFG00000023313 |              | 2.1944873  | 0.0333169 |
| ENSCAFG00000023339 |              | -1.1525263 | 0.0132799 |
| ENSCAFG00000023755 | GMPPB        | 1.1331362  | 0.0275096 |
| ENSCAFG00000023757 | ADAMTSL2     | 1.8139829  | 0.0251371 |
| ENSCAFG00000023759 | MT2A         | 3.3656166  | 0.0001174 |
| ENSCAFG00000023881 | ZNF227       | 1.3708991  | 0.0086881 |
| ENSCAFG00000023887 | BCAS4        | 1.8259834  | 0.0146779 |
| ENSCAFG00000023904 | CHRNB4       | 2.2639691  | 0.0099671 |
| ENSCAFG00000023986 | TMEM121      | 1.9995846  | 0.0163271 |
| ENSCAFG00000024187 | DPEP2        | -1.4942701 | 0.0274082 |
| ENSCAFG00000024239 | MLLT11       | 2.9445566  | 0.0004494 |
| ENSCAFG00000024609 | CNTN2        | 2.1734298  | 0.0011631 |
| ENSCAFG00000024681 |              | 3.5540753  | 0.000546  |

|                    |             |            |           |
|--------------------|-------------|------------|-----------|
| ENSCAFG00000024731 | RP9         | -1.0923094 | 0.001598  |
| ENSCAFG00000024802 |             | 1.0538697  | 0.0490096 |
| ENSCAFG00000024807 | CHRNA       | 6.4101752  | 0.0001536 |
| ENSCAFG00000024834 |             | 2.6919239  | 0.0140258 |
| ENSCAFG00000024901 | ZSCAN12     | -1.1339625 | 0.0057243 |
| ENSCAFG00000024908 | PLA2G4E     | 2.8758367  | 0.001596  |
| ENSCAFG00000025020 |             | 1.005517   | 0.0481236 |
| ENSCAFG00000025213 | FAM111B     | 1.1300711  | 0.0132696 |
| ENSCAFG00000025295 |             | 1.1393788  | 0.0006477 |
| ENSCAFG00000025390 | SLC22A17    | 2.0374905  | 7.29E-05  |
| ENSCAFG00000025473 | CPA4        | 1.2926093  | 0.0043027 |
| ENSCAFG00000025524 |             | 1.0511327  | 0.0114232 |
| ENSCAFG00000025555 |             | -2.6909253 | 0.016625  |
| ENSCAFG00000025589 |             | -1.117152  | 0.0461707 |
| ENSCAFG00000025678 | cfa-mir-568 | 1.0256103  | 0.0434385 |
| ENSCAFG00000027573 |             | 2.4892775  | 3.81E-05  |
| ENSCAFG00000027890 | RF00002     | 2.2516003  | 0.0133556 |
| ENSCAFG00000028220 | RF00009     | 5.1149746  | 0.000296  |
| ENSCAFG00000028459 | MT3         | 2.8744037  | 0.0004428 |
| ENSCAFG00000028460 |             | 2.3652681  | 0.0011151 |
| ENSCAFG00000028490 |             | 1.7891883  | 0.0322275 |
| ENSCAFG00000028544 |             | 2.6257845  | 0.0080108 |
| ENSCAFG00000028594 | RF01973     | 3.7917289  | 3.18E-05  |
| ENSCAFG00000028636 | IGFBP6      | 1.3041374  | 0.0212964 |
| ENSCAFG00000028647 | BGLAP       | 2.2628671  | 0.0037027 |
| ENSCAFG00000028653 |             | 1.907295   | 0.0059677 |
| ENSCAFG00000028708 | SCD5        | -1.3344739 | 0.04675   |
| ENSCAFG00000028739 | ABHD10      | -1.2262447 | 0.0085553 |
| ENSCAFG00000028748 |             | 3.3619939  | 0.0029589 |
| ENSCAFG00000028753 | RF00001     | 2.6811898  | 0.0361246 |
| ENSCAFG00000028761 |             | 1.3584144  | 0.0487441 |
| ENSCAFG00000028802 | MRPL34      | -1.1449448 | 0.0002084 |
| ENSCAFG00000028808 |             | 1.4620694  | 0.0027875 |
| ENSCAFG00000028817 | CFD         | 1.3802115  | 0.013706  |
| ENSCAFG00000028869 | GPX8        | 1.1557273  | 0.010241  |
| ENSCAFG00000028877 |             | -1.1322645 | 0.0240401 |
| ENSCAFG00000028947 | ELN         | 1.8641504  | 0.0049252 |
| ENSCAFG00000028958 | TCEAL7      | 3.7209306  | 0.0001178 |
| ENSCAFG00000028982 |             | 1.3853987  | 0.0432197 |
| ENSCAFG00000028987 |             | 3.5433383  | 0.0015061 |
| ENSCAFG00000029004 |             | -1.2820236 | 0.0002613 |
| ENSCAFG00000029079 | ZNF614      | 1.0374636  | 0.0172793 |
| ENSCAFG00000029129 | RF01871     | 3.54521    | 1.28E-05  |
| ENSCAFG00000029130 | KAZALD1     | 2.0050846  | 0.005158  |
| ENSCAFG00000029153 | PEG3        | 1.0453331  | 0.0092147 |
| ENSCAFG00000029304 | RF01972     | 4.2701575  | 7.95E-06  |
| ENSCAFG00000029322 | SCN2B       | 2.4707413  | 0.0060704 |
| ENSCAFG00000029324 |             | 1.0206873  | 0.0478012 |
| ENSCAFG00000029369 |             | 2.8714409  | 0.0040285 |
| ENSCAFG00000029381 |             | 1.3972429  | 0.0207192 |

|                    |          |            |           |
|--------------------|----------|------------|-----------|
| ENSCAFG00000029384 |          | 2.6621783  | 0.0084145 |
| ENSCAFG00000029474 | GADD45A  | 1.409163   | 0.0013478 |
| ENSCAFG00000029499 |          | 3.1489717  | 0.0119107 |
| ENSCAFG00000029502 |          | 1.2176111  | 0.0071638 |
| ENSCAFG00000029512 |          | 2.7447172  | 0.0180189 |
| ENSCAFG00000029612 | MSS51    | -1.8274801 | 0.0435307 |
| ENSCAFG00000029657 |          | 2.9692702  | 0.0074776 |
| ENSCAFG00000029673 |          | 1.4969374  | 0.0002389 |
| ENSCAFG00000029853 | CDKN1A   | 2.9091499  | 1.35E-06  |
| ENSCAFG00000029856 | RF01881  | 8.0200698  | 0.0200494 |
| ENSCAFG00000029882 | MISP     | 5.1712415  | 1.65E-06  |
| ENSCAFG00000029937 | EFHD1    | 2.3529143  | 0.0011461 |
| ENSCAFG00000030004 | COA7     | -1.0688607 | 8.85E-05  |
| ENSCAFG00000030025 | FGL2     | 1.641265   | 0.0002306 |
| ENSCAFG00000030105 | IL33     | 1.4345488  | 0.0422877 |
| ENSCAFG00000030120 | CSPG4    | 2.7799717  | 0.0005772 |
| ENSCAFG00000030140 |          | 2.8599576  | 0.0057306 |
| ENSCAFG00000030170 | ZNF229   | 1.1313469  | 0.0487053 |
| ENSCAFG00000030198 |          | 2.0380779  | 0.0270569 |
| ENSCAFG00000030205 | KCTD1    | 1.109113   | 0.0247439 |
| ENSCAFG00000030240 | DUSP4    | 1.01176    | 0.0194178 |
| ENSCAFG00000030242 | HS3ST2   | 1.5293694  | 0.0011212 |
| ENSCAFG00000030310 |          | 1.5452991  | 0.0099306 |
| ENSCAFG00000030348 |          | -1.2217618 | 0.0010206 |
| ENSCAFG00000030356 |          | 1.1828407  | 0.0262119 |
| ENSCAFG00000030412 | BCL2L11  | 1.2916706  | 0.0367189 |
| ENSCAFG00000030416 | RGS16    | -1.1745519 | 0.0106075 |
| ENSCAFG00000030425 |          | -1.3599376 | 0.0177819 |
| ENSCAFG00000030469 |          | 3.9851279  | 0.0003344 |
| ENSCAFG00000030538 |          | -1.1587034 | 0.0403714 |
| ENSCAFG00000030576 | PPP1R15A | 1.2488683  | 0.0080266 |
| ENSCAFG00000030616 |          | 3.2498502  | 0.0042798 |
| ENSCAFG00000030655 |          | 4.2787272  | 0.0008717 |
| ENSCAFG00000030662 |          | 1.7734667  | 0.0204471 |
| ENSCAFG00000030667 |          | 1.3199661  | 0.0078169 |
| ENSCAFG00000030670 |          | 1.0237026  | 0.0178795 |
| ENSCAFG00000030686 | GLIPR2   | 1.3445222  | 0.0158092 |
| ENSCAFG00000030757 |          | 1.0113553  | 0.0373816 |
| ENSCAFG00000030770 |          | 2.106183   | 2.52E-05  |
| ENSCAFG00000030835 |          | -1.2894461 | 0.0031047 |
| ENSCAFG00000030867 | HPCAL4   | -1.7995289 | 0.001087  |
| ENSCAFG00000030875 |          | 2.1590787  | 0.0074889 |
| ENSCAFG00000030932 | TMEM218  | 2.1827057  | 0.000795  |
| ENSCAFG00000031172 | CADM4    | 1.0076534  | 0.010747  |
| ENSCAFG00000031239 |          | 1.5317568  | 0.0189766 |
| ENSCAFG00000031281 |          | 3.1999672  | 0.000871  |
| ENSCAFG00000031299 |          | 1.5004841  | 0.0012285 |
| ENSCAFG00000031302 |          | 1.2318253  | 0.0035419 |
| ENSCAFG00000031337 |          | 1.2002897  | 0.0428143 |
| ENSCAFG00000031392 | PRR7     | 1.4726677  | 0.0108541 |

|                    |          |            |           |
|--------------------|----------|------------|-----------|
| ENSCAFG00000031481 |          | -2.0915967 | 0.0043924 |
| ENSCAFG00000031490 |          | 2.8652406  | 0.0067246 |
| ENSCAFG00000031499 | GLIS3    | 2.0046546  | 0.0270222 |
| ENSCAFG00000031514 |          | 2.9934354  | 0.0035361 |
| ENSCAFG00000031544 |          | 1.9944877  | 0.0185174 |
| ENSCAFG00000031706 |          | -1.2258907 | 0.048265  |
| ENSCAFG00000031727 | STC2     | 1.6863172  | 0.0114515 |
| ENSCAFG00000031759 | NAPRT    | 1.1033874  | 0.0289729 |
| ENSCAFG00000031894 | TENT5A   | 1.227333   | 0.0367399 |
| ENSCAFG00000031922 | GPX3     | 2.3486299  | 0.0121651 |
| ENSCAFG00000031936 | NRBF2    | -1.2288764 | 0.0170197 |
| ENSCAFG00000031938 | GEM      | 1.6532407  | 0.023744  |
| ENSCAFG00000032024 | GPR162   | -2.0269322 | 0.0187453 |
| ENSCAFG00000032029 |          | 1.0383588  | 0.0189227 |
| ENSCAFG00000032032 |          | -1.3905757 | 0.0176839 |
| ENSCAFG00000032043 |          | -1.9397272 | 0.0012097 |
| ENSCAFG00000032089 |          | 1.4611743  | 0.0409852 |
| ENSCAFG00000032112 | TAL2     | 3.649864   | 0.0110786 |
| ENSCAFG00000032120 | C1QTNF6  | 1.8173234  | 0.0066008 |
| ENSCAFG00000032147 | BAALC    | -1.4898624 | 0.0007005 |
| ENSCAFG00000032163 |          | 2.8190653  | 0.0140401 |
| ENSCAFG00000032167 |          | 2.8133738  | 0.0052328 |
| ENSCAFG00000032191 | MAP1A    | 2.3750453  | 0.0251785 |
| ENSCAFG00000032214 |          | 2.6736124  | 0.011212  |
| ENSCAFG00000032227 | OLFM1    | 3.3765206  | 1.23E-05  |
| ENSCAFG00000032235 |          | 1.144905   | 0.0080936 |
| ENSCAFG00000032276 |          | 2.9731028  | 0.004711  |
| ENSCAFG00000032286 |          | 1.4669801  | 0.0147116 |
| ENSCAFG00000032331 |          | 3.5397125  | 0.0049591 |
| ENSCAFG00000032392 |          | 1.2463359  | 0.0002074 |
| ENSCAFG00000032403 | MAP3K7CL | 1.506873   | 0.0100996 |
| ENSCAFG00000032443 |          | 3.4716236  | 0.001794  |
| ENSCAFG00000032445 |          | 1.8445519  | 0.0009014 |
| ENSCAFG00000032467 |          | 2.9223795  | 0.0055118 |
| ENSCAFG00000032571 |          | 3.4435978  | 1.44E-05  |
| ENSCAFG00000032572 |          | 3.7383654  | 0.0014285 |
| ENSCAFG00000032575 |          | -1.6026832 | 0.0070082 |
| ENSCAFG00000032608 | LURAP1L  | -1.0209278 | 0.0451573 |
| ENSCAFG00000032684 |          | 1.4374918  | 0.0202985 |
| ENSCAFG00000032696 |          | 2.6616931  | 0.0184259 |
| ENSCAFG00000032697 | MAP6D1   | -2.2936664 | 0.0022139 |
| ENSCAFG00000032871 |          | 1.913815   | 0.031141  |
| ENSCAFG00000032896 |          | 1.9658944  | 0.0013117 |
| ENSCAFG00000032925 |          | 1.5000178  | 0.0239158 |
| ENSCAFG00000033011 |          | -2.7498582 | 0.0199728 |
| ENSCAFG00000033181 |          | 1.1039208  | 0.0017598 |
| ENSCAFG00000033248 |          | -3.8962083 | 5.12E-05  |
| ENSCAFG00000033312 |          | -1.4508388 | 0.0116434 |
| ENSCAFG00000033531 |          | 2.8653777  | 0.0060876 |
| ENSCAFG00000033759 |          | -4.1657867 | 0.0013268 |

|                    |            |           |
|--------------------|------------|-----------|
| ENSCAFG00000034014 | -1.9095631 | 0.0002254 |
| ENSCAFG00000034213 | 1.4423746  | 0.0087016 |
| ENSCAFG00000034661 | 1.7239482  | 0.005424  |
| ENSCAFG00000034853 | -1.4165901 | 0.0092611 |
| ENSCAFG00000034881 | 1.7999213  | 0.0092183 |
| ENSCAFG00000035036 | -1.834187  | 0.0248834 |
| ENSCAFG00000035199 | 3.6010681  | 0.000318  |
| ENSCAFG00000035602 | 1.5694818  | 0.0240247 |
| ENSCAFG00000035834 | -2.5156096 | 0.0154571 |
| ENSCAFG00000036044 | 1.9723707  | 0.040506  |
| ENSCAFG00000036200 | -1.4070921 | 0.0179547 |
| ENSCAFG00000036350 | -2.584086  | 0.0416305 |
| ENSCAFG00000036996 | 1.4684042  | 0.006014  |
| ENSCAFG00000037515 | 1.3333519  | 0.0081007 |
| ENSCAFG00000037835 | -2.0754566 | 0.0096627 |
| ENSCAFG00000037878 | -2.6736902 | 1.93E-06  |
| ENSCAFG00000038197 | 1.507816   | 0.0363727 |
| ENSCAFG00000038302 | 2.9220076  | 0.0050989 |
| ENSCAFG00000038320 | -2.4808233 | 9.85E-08  |
| ENSCAFG00000038468 | 3.9072856  | 0.0002694 |
| ENSCAFG00000038525 | -1.0654407 | 0.0375253 |
| ENSCAFG00000038545 | 1.693673   | 0.0123975 |
| ENSCAFG00000038558 | 3.0831221  | 0.0001577 |
| ENSCAFG00000038812 | -2.0347806 | 0.038946  |
| ENSCAFG00000039156 | -1.0317933 | 0.0427547 |
| ENSCAFG00000039836 | 5.0522795  | 0.0018335 |
| ENSCAFG00000040479 | -3.108107  | 0.0104588 |
| ENSCAFG00000040506 | 1.8240824  | 0.0249977 |
| ENSCAFG00000040611 | 1.651615   | 0.0362967 |

Table S3: List of differentially expressed genes in the Vastus lateralis muscle of untreated XLMTM dogs, compared to WT controls; logFC: base 2 logarithm of the expression fold change (XLMTM / WT).

| ensembl ID         | Gene name | logFC        | PValue      |
|--------------------|-----------|--------------|-------------|
| ENSCAFG00000000068 | BCL2      | 1.512914721  | 0.005146778 |
| ENSCAFG00000000082 | CDK2      | 1.172962758  | 0.012277282 |
| ENSCAFG00000000097 | ERBB3     | 2.836526719  | 0.003004938 |
| ENSCAFG00000000124 | TIMELESS  | 1.393514773  | 0.013025503 |
| ENSCAFG00000000235 | N4BP3     | -1.313344461 | 0.001392379 |
| ENSCAFG00000000236 | RMND5B    | -1.048452164 | 0.001016577 |
| ENSCAFG00000000251 | MAP3K5    | 1.266306896  | 0.018975459 |
| ENSCAFG00000000282 | HECA      | -1.116657654 | 0.000100464 |
| ENSCAFG00000000288 |           | 1.225063765  | 0.014366904 |
| ENSCAFG00000000311 | LRIG3     | 1.300635589  | 0.035351857 |
| ENSCAFG00000000330 | FBXO30    | 1.052853722  | 0.008727095 |
| ENSCAFG00000000420 | CPM       | 2.721416191  | 0.000992424 |
| ENSCAFG00000000426 | LYZ       | -1.27603093  | 1.00E-05    |
| ENSCAFG00000000448 | DDR1      | 1.154792529  | 0.030021316 |
| ENSCAFG00000000456 | THAP2     | -1.029351568 | 0.003465968 |
| ENSCAFG00000000479 | KCNC2     | 1.198295396  | 0.019905426 |
| ENSCAFG00000000493 | OSR2      | 1.592400768  | 0.005010673 |
| ENSCAFG00000000510 | PRR16     | 3.965700458  | 2.68E-07    |
| ENSCAFG00000000522 | SNCAIP    | -1.248719196 | 0.005918512 |
| ENSCAFG00000000523 |           | 1.27777025   | 0.003421019 |
| ENSCAFG00000000535 | MYCT1     | -1.542886278 | 6.70E-05    |
| ENSCAFG00000000565 |           | 1.142983473  | 0.011662693 |
| ENSCAFG00000000568 | MAPK8IP2  | 1.044702044  | 0.026063634 |
| ENSCAFG00000000569 | ZNF608    | 1.1270997    | 0.00171455  |
| ENSCAFG00000000594 | MARCH3    | 1.044053623  | 0.047267013 |
| ENSCAFG00000000611 | MEGF10    | 1.239697597  | 0.001356059 |
| ENSCAFG00000000622 | PRRC1     | 1.158353573  | 0.001115949 |
| ENSCAFG00000000626 |           | 1.118519336  | 0.003150302 |
| ENSCAFG00000000639 | HSPA1L    | -1.016924772 | 0.000512148 |
| ENSCAFG00000000640 |           | -1.387721827 | 0.008899671 |
| ENSCAFG00000000641 |           | -1.361720915 | 0.011875895 |
| ENSCAFG00000000644 | SYNJ2     | 1.022446966  | 0.034369308 |
| ENSCAFG00000000654 | FZD6      | -1.053074181 | 0.00378533  |
| ENSCAFG00000000667 | FNDC1     | 2.103958151  | 0.007866071 |
| ENSCAFG00000000671 | SOD2      | -1.111481233 | 0.008075719 |
| ENSCAFG00000000701 |           | 1.53986253   | 9.93E-06    |
| ENSCAFG00000000750 | SLC22A1   | 3.041867806  | 0.018075209 |
| ENSCAFG00000000798 |           | -1.333510837 | 0.02002046  |
| ENSCAFG00000000840 | SLC22A4   | 1.528584769  | 0.010455085 |
| ENSCAFG00000000884 | WDR27     | 1.459863864  | 0.018722658 |
| ENSCAFG00000000886 | DSE       | 1.632552992  | 7.49E-06    |
| ENSCAFG00000000934 | COL14A1   | 2.085664665  | 0.000262749 |
| ENSCAFG00000000946 | A4GALT    | 1.17478725   | 4.82E-05    |
| ENSCAFG00000001023 | MEI1      | 1.010716423  | 0.041012045 |
| ENSCAFG00000001106 | LAMA2     | 1.964839444  | 0.006539003 |
| ENSCAFG00000001126 | KLHL3     | 1.302068645  | 0.015689971 |



|                    |            |              |             |
|--------------------|------------|--------------|-------------|
| ENSCAFG00000001166 | KHDRBS3    | 1.913245744  | 0.003910825 |
| ENSCAFG00000001176 | MRPL55     | -1.012312936 | 0.010033826 |
| ENSCAFG00000001250 | MROH5      | 2.312570414  | 0.018277086 |
| ENSCAFG00000001287 | TCP11      | -2.03217957  | 0.000182647 |
| ENSCAFG00000001299 | ZC3H3      | 1.125862995  | 0.038769959 |
| ENSCAFG00000001317 | EEF1D      | -1.33016626  | 0.000415693 |
| ENSCAFG00000001324 | ATF4       | -1.420750897 | 0.00129299  |
| ENSCAFG00000001336 | ISCA1      | -1.007809986 | 0.000626821 |
| ENSCAFG00000001426 | COPG2      | 1.131063216  | 3.89E-05    |
| ENSCAFG00000001438 | PI16       | 1.545078912  | 0.024936228 |
| ENSCAFG00000001453 | RASEF      | -2.146153007 | 0.000103851 |
| ENSCAFG00000001513 | KCTD17     | -1.568934667 | 6.95E-05    |
| ENSCAFG00000001515 | STRIP2     | 1.255825654  | 0.000840832 |
| ENSCAFG00000001531 | SMO        | 1.110486728  | 0.024652808 |
| ENSCAFG00000001537 | FREM1      | 1.621795963  | 0.004323272 |
| ENSCAFG00000001556 | KCNK17     | 2.305177845  | 7.20E-05    |
| ENSCAFG00000001596 | FOXP4      | 2.091095449  | 3.82E-06    |
| ENSCAFG00000001616 | KCP        | 1.85721633   | 0.00185992  |
| ENSCAFG00000001636 | PPP1R16A   | 1.031576931  | 0.000870891 |
| ENSCAFG00000001646 | PRUNE2     | 3.399318155  | 0.000239015 |
| ENSCAFG00000001649 | GCNT1      | 3.056173032  | 0.000239287 |
| ENSCAFG00000001672 | LEP        | 4.763085891  | 0.000210633 |
| ENSCAFG00000001705 | MB         | -1.547539764 | 0.013542253 |
| ENSCAFG00000001730 | GCC1       | 1.077616813  | 0.002673402 |
| ENSCAFG00000001793 | BTBD11     | 1.551643808  | 0.00653172  |
| ENSCAFG00000001840 | B4GALT1    | 1.027668154  | 0.008661043 |
| ENSCAFG00000001852 | ADAM22     | -1.374857717 | 0.025736584 |
| ENSCAFG00000001854 |            | -1.952007842 | 0.035660473 |
| ENSCAFG00000001875 | CKAP4      | 1.148824276  | 0.026289292 |
| ENSCAFG00000001885 | APPL2      | 1.239516258  | 0.000839671 |
| ENSCAFG00000001890 | MAMDC2     | 1.277191367  | 0.01643615  |
| ENSCAFG00000001897 | APBA1      | 1.215066888  | 0.019191295 |
| ENSCAFG00000001909 | KIF24      | 1.81716916   | 0.001685762 |
| ENSCAFG00000001923 | DNAI1      | 4.48304296   | 0.004636016 |
| ENSCAFG00000001966 | SH3RF3     | -1.927100824 | 0.002256998 |
| ENSCAFG00000001985 |            | 1.039690188  | 0.003086778 |
| ENSCAFG00000002040 | TFPI2      | -1.973603952 | 0.001865922 |
| ENSCAFG00000002042 |            | -1.440245533 | 0.010588672 |
| ENSCAFG00000002046 | GNG11      | -1.54744477  | 1.38E-05    |
| ENSCAFG00000002053 | RFX3       | 1.84761366   | 0.002658039 |
| ENSCAFG00000002057 | PDGFRA     | 1.118666213  | 0.040143448 |
| ENSCAFG00000002069 | COL1A2     | 2.925392536  | 8.69E-05    |
| ENSCAFG00000002079 | KDR        | -1.497427782 | 8.46E-05    |
| ENSCAFG00000002084 |            | 1.224256255  | 0.035327292 |
| ENSCAFG00000002098 | C10H2orf40 | -1.798114852 | 0.031979336 |
| ENSCAFG00000002105 | FHL2       | 1.817158446  | 0.044744006 |
| ENSCAFG00000002116 | PLGRKT     | -1.364684603 | 1.22E-05    |
| ENSCAFG00000002195 | SDHAF3     | -1.190357481 | 0.027855327 |
| ENSCAFG00000002230 |            | -1.660025677 | 0.001904885 |
| ENSCAFG00000002301 | ECM2       | 1.078459066  | 0.008406089 |

|                    |            |              |             |
|--------------------|------------|--------------|-------------|
| ENSCAFG00000002319 | KIAA1211L  | 3.749003388  | 3.44E-05    |
| ENSCAFG00000002330 | IGFBP7     | -1.749127525 | 8.46E-05    |
| ENSCAFG00000002358 | VWA3B      | 1.331704984  | 0.001510756 |
| ENSCAFG00000002365 | TMEM131    | 1.345509869  | 0.00024939  |
| ENSCAFG00000002420 | MEOX2      | -1.358391232 | 0.002282639 |
| ENSCAFG00000002432 | TSPAN13    | -1.704681942 | 7.09E-06    |
| ENSCAFG00000002498 | HDAC9      | 1.059230809  | 0.007135728 |
| ENSCAFG00000002517 |            | 1.346231484  | 0.001780718 |
| ENSCAFG00000002576 | HIVEP3     | 2.159868089  | 0.026518024 |
| ENSCAFG00000002606 |            | 1.539278061  | 0.002205048 |
| ENSCAFG00000002635 | RDH13      | -1.324156386 | 0.00894479  |
| ENSCAFG00000002645 | KCNQ5      | 1.674362122  | 5.51E-05    |
| ENSCAFG00000002656 | EEF1A1     | 1.242180023  | 0.002390132 |
| ENSCAFG00000002701 | TFPT       | -1.035921803 | 0.005092193 |
| ENSCAFG00000002728 | CDCA7L     | 1.028771214  | 0.008658095 |
| ENSCAFG00000002741 | MYO6       | 1.139662194  | 0.008117135 |
| ENSCAFG00000002748 |            | 1.362743224  | 0.001197956 |
| ENSCAFG00000002753 | GPNMB      | 2.20112516   | 0.008669705 |
| ENSCAFG00000002814 | KCNQ4      | 1.85384467   | 0.006646778 |
| ENSCAFG00000002822 | LCA5       | 1.228737831  | 0.025094462 |
| ENSCAFG00000002830 | RIMS3      | -3.512294484 | 1.20E-05    |
| ENSCAFG00000002837 | TMEM245    | 1.096738154  | 3.62E-05    |
| ENSCAFG00000002856 | CYCS       | -1.190275858 | 0.029410109 |
| ENSCAFG00000002919 | EFEMP1     | 1.429460589  | 0.013958762 |
| ENSCAFG00000002927 | CCDC85A    | -1.196861311 | 0.000163276 |
| ENSCAFG00000002948 | HOXA4      | 1.118026487  | 0.011069215 |
| ENSCAFG00000002974 | FAM71E1    | 1.844948802  | 0.005760653 |
| ENSCAFG00000002994 | NT5E       | 1.127540876  | 0.010707424 |
| ENSCAFG00000003000 | PTGR1      | 1.357704481  | 0.000917353 |
| ENSCAFG00000003008 | C11H9orf84 | 8.795896607  | 3.43E-05    |
| ENSCAFG00000003010 | UGCG       | 1.06033919   | 0.001411574 |
| ENSCAFG00000003087 |            | 1.422426202  | 0.007883458 |
| ENSCAFG00000003096 | PM20D2     | 1.866701978  | 0.000482124 |
| ENSCAFG00000003097 | CRHR2      | 1.886625788  | 0.039923614 |
| ENSCAFG00000003105 | ANKRD6     | 2.501267058  | 5.76E-06    |
| ENSCAFG00000003116 | BACH2      | 1.279358038  | 0.009349916 |
| ENSCAFG00000003233 | MEIS1      | 1.343509195  | 0.006184263 |
| ENSCAFG00000003255 | MANEAL     | -1.374321496 | 0.010033416 |
| ENSCAFG00000003268 | ARHGAP25   | -1.17964162  | 0.001913188 |
| ENSCAFG00000003290 | THAP5      | -1.072325058 | 0.000287464 |
| ENSCAFG00000003327 | COL27A1    | 2.318914477  | 0.018749267 |
| ENSCAFG00000003388 | SH3D21     | 1.934226217  | 0.000200634 |
| ENSCAFG00000003402 | CAV2       | -1.057265941 | 0.000332251 |
| ENSCAFG00000003404 | CAV1       | -1.018044877 | 0.006177844 |
| ENSCAFG00000003411 | EZH2       | 1.050304162  | 0.006129439 |
| ENSCAFG00000003465 | EGFR       | 1.208179465  | 0.013419578 |
| ENSCAFG00000003480 | STK17A     | -1.042565172 | 0.005661619 |
| ENSCAFG00000003530 |            | 1.771717875  | 9.60E-06    |
| ENSCAFG00000003564 |            | 1.015664287  | 0.031688118 |
| ENSCAFG00000003579 | GREB1      | -2.549157899 | 0.009208115 |

|                    |          |              |             |
|--------------------|----------|--------------|-------------|
| ENSCAFG00000003599 | ZMYM6    | -1.081855858 | 6.01E-05    |
| ENSCAFG00000003605 | GJA4     | -1.577907347 | 0.000881689 |
| ENSCAFG00000003620 | RCN3     | 1.179797714  | 0.008966859 |
| ENSCAFG00000003639 |          | -1.391141522 | 0.000557848 |
| ENSCAFG00000003676 |          | -1.074228768 | 0.008345026 |
| ENSCAFG00000003680 | MYLK3    | 4.790505736  | 3.28E-06    |
| ENSCAFG00000003700 | MAML3    | 1.498025774  | 0.040190266 |
| ENSCAFG00000003719 | RTN4IP1  | -1.03819734  | 0.010600613 |
| ENSCAFG00000003720 | NRCAM    | 4.283879136  | 3.64E-07    |
| ENSCAFG00000003775 | OSR1     | 2.733224827  | 6.01E-05    |
| ENSCAFG00000003797 |          | -1.387226614 | 0.001555274 |
| ENSCAFG00000003804 |          | 1.91604871   | 0.027291532 |
| ENSCAFG00000003810 | PPIL6    | 1.886156161  | 0.028278525 |
| ENSCAFG00000003816 | SMPD2    | 1.357520695  | 0.000567919 |
| ENSCAFG00000003824 | MICAL1   | 2.0767653    | 4.15E-06    |
| ENSCAFG00000003854 | WASF1    | 1.3667595    | 0.007760034 |
| ENSCAFG00000003887 | APOB     | 3.292067243  | 0.003179052 |
| ENSCAFG00000003907 | BRAF     | 1.00346522   | 0.000782651 |
| ENSCAFG00000003941 | SPATA6   | 1.418324303  | 0.020156672 |
| ENSCAFG00000003942 | REV3L    | 1.02376239   | 0.000720562 |
| ENSCAFG00000003960 | TRAF3IP2 | 1.576682143  | 0.044037897 |
| ENSCAFG00000003961 | SPHK2    | 1.195593731  | 0.000679054 |
| ENSCAFG00000004029 | TMEM143  | -1.175801443 | 0.043712144 |
| ENSCAFG00000004054 | HS3ST5   | -1.8084843   | 0.027277983 |
| ENSCAFG00000004087 | MAML2    | 1.005929179  | 0.036569253 |
| ENSCAFG00000004091 |          | -1.19180674  | 0.008485431 |
| ENSCAFG00000004124 |          | 1.144810094  | 0.031929765 |
| ENSCAFG00000004127 | SESN3    | 2.678404538  | 7.91E-05    |
| ENSCAFG00000004128 | BBS7     | 1.015902494  | 9.12E-05    |
| ENSCAFG00000004137 | AMOTL1   | 1.104107903  | 0.001302996 |
| ENSCAFG00000004176 | PANX1    | 2.078667435  | 0.001784746 |
| ENSCAFG00000004201 | SLC1A5   | 1.802754086  | 0.018149829 |
| ENSCAFG00000004232 | HS6ST1   | 1.082993043  | 1.17E-05    |
| ENSCAFG00000004274 | LRRC17   | 1.647593439  | 0.01369921  |
| ENSCAFG00000004297 | CCDC8    | 3.386229398  | 0.001407136 |
| ENSCAFG00000004300 | PNMA8A   | 1.023434874  | 0.028642719 |
| ENSCAFG00000004331 |          | 2.077663616  | 0.000552383 |
| ENSCAFG00000004334 | SELENOI  | 1.001921433  | 0.018102234 |
| ENSCAFG00000004366 | MAGI2    | 1.331128361  | 0.014361632 |
| ENSCAFG00000004374 | SOX9     | 2.155439117  | 0.002347172 |
| ENSCAFG00000004392 | DMPK     | 1.766780598  | 6.28E-05    |
| ENSCAFG00000004395 | FBXO46   | 1.24659206   | 0.003949637 |
| ENSCAFG00000004402 | PRSS23   | 1.458625327  | 0.001191717 |
| ENSCAFG00000004406 | FBLN2    | 1.336998079  | 0.010147288 |
| ENSCAFG00000004408 | CAB39L   | 1.10280487   | 0.020579231 |
| ENSCAFG00000004416 | GPR4     | -1.475342592 | 0.000438661 |
| ENSCAFG00000004421 | CDADC1   | -1.041150674 | 0.00962539  |
| ENSCAFG00000004454 | SUCLA2   | -1.026473486 | 0.012661488 |
| ENSCAFG00000004481 | SLC6A6   | 1.975231116  | 0.002518781 |
| ENSCAFG00000004492 | GRIP2    | 1.837638298  | 0.001284887 |

|                    |          |              |             |
|--------------------|----------|--------------|-------------|
| ENSCAFG00000004500 | SYTL2    | -1.06740374  | 0.00904852  |
| ENSCAFG00000004510 | CDC42EP4 | 1.211227012  | 0.009210795 |
| ENSCAFG00000004632 |          | -1.610486819 | 0.011053902 |
| ENSCAFG00000004634 |          | -1.248256843 | 0.02320903  |
| ENSCAFG00000004636 | BCAM     | 1.431501768  | 0.004542265 |
| ENSCAFG00000004639 | SUSD5    | 4.81671273   | 6.79E-06    |
| ENSCAFG00000004694 | PTCH2    | 1.286122088  | 0.037600146 |
| ENSCAFG00000004714 | FAM107B  | -1.183818488 | 0.024977367 |
| ENSCAFG00000004731 | TENM4    | 1.9804845    | 0.002295963 |
| ENSCAFG00000004746 | XRCC1    | 1.336406212  | 0.001164325 |
| ENSCAFG00000004769 | OPTN     | -1.512936657 | 0.011889457 |
| ENSCAFG00000004785 | IFT122   | 1.168932927  | 0.002855345 |
| ENSCAFG00000004801 | ASB10    | -1.42617755  | 0.025563651 |
| ENSCAFG00000004802 | KBTBD6   | 1.062898207  | 0.002315397 |
| ENSCAFG00000004820 | ITGA9    | 1.722472476  | 0.00240463  |
| ENSCAFG00000004834 | TMEM145  | 1.616226282  | 0.000482552 |
| ENSCAFG00000004916 | H3F3B    | 1.190683906  | 0.000275596 |
| ENSCAFG00000004931 | PLCD1    | 1.180200375  | 0.013188269 |
| ENSCAFG00000004956 | PAK1     | 1.300710136  | 0.012617338 |
| ENSCAFG00000004958 | ATP1A3   | -1.916108938 | 0.019185539 |
| ENSCAFG00000004991 | PPARG    | 1.436105852  | 0.033155165 |
| ENSCAFG00000005037 | KLF5     | 1.236429367  | 0.034166191 |
| ENSCAFG00000005051 | SCN5A    | 4.78620908   | 0.000164719 |
| ENSCAFG00000005069 | PTPRF    | 1.93251872   | 0.005101075 |
| ENSCAFG00000005081 | INSIG1   | -1.413172311 | 1.31E-07    |
| ENSCAFG00000005087 | TTC21A   | 1.209267143  | 0.027065942 |
| ENSCAFG00000005183 | SLAIN1   | 1.203853093  | 0.040575689 |
| ENSCAFG00000005212 | FOSL2    | 1.220354061  | 0.005349322 |
| ENSCAFG00000005217 | NCAPG2   | 1.145805385  | 0.027915043 |
| ENSCAFG00000005220 | SZT2     | 1.134297111  | 0.00087565  |
| ENSCAFG00000005252 | TMC6     | -1.050384564 | 0.028550261 |
| ENSCAFG00000005255 | VIPR2    | -2.04118437  | 3.36E-05    |
| ENSCAFG00000005294 | TK1      | 1.370300308  | 0.020792332 |
| ENSCAFG00000005301 | PSD3     | 2.372101143  | 0.005769671 |
| ENSCAFG00000005348 | EHD3     | 1.844069921  | 0.025868063 |
| ENSCAFG00000005362 | PLD3     | 1.089200362  | 0.000696313 |
| ENSCAFG00000005365 | DGAT2    | 4.492214841  | 0.000470021 |
| ENSCAFG00000005404 | TEP1     | 1.235119406  | 0.000380719 |
| ENSCAFG00000005411 | OSBPL10  | 1.87899972   | 4.04E-05    |
| ENSCAFG00000005433 | ABCC4    | -1.235849924 | 0.006665142 |
| ENSCAFG00000005474 | TPPP2    | -1.347649924 | 0.024591742 |
| ENSCAFG00000005530 | ZFP36    | 1.435011212  | 0.009107289 |
| ENSCAFG00000005542 | C1QTNF1  | 1.362450268  | 0.004711636 |
| ENSCAFG00000005560 | FLRT3    | 1.63279373   | 0.004456929 |
| ENSCAFG00000005564 | UCP2     | 1.582672682  | 9.22E-05    |
| ENSCAFG00000005671 | LRR3B    | -3.502442338 | 0.003636318 |
| ENSCAFG00000005693 | MZB1     | 2.554785651  | 0.002654434 |
| ENSCAFG00000005701 | MEMO1    | -1.32766682  | 0.00167927  |
| ENSCAFG00000005723 | PSD2     | 2.10650051   | 0.022231663 |
| ENSCAFG00000005746 | NAV3     | 1.370701686  | 0.046737046 |

|                    |          |              |             |
|--------------------|----------|--------------|-------------|
| ENSCAFG00000005767 | PDE6G    | -1.793437916 | 0.042789501 |
| ENSCAFG00000005812 |          | -1.031260912 | 0.048377229 |
| ENSCAFG00000005839 | SATB1    | -1.232135107 | 4.92E-05    |
| ENSCAFG00000005846 | GCGR     | 1.038683765  | 0.02127341  |
| ENSCAFG00000005851 |          | -1.208214466 | 0.023324469 |
| ENSCAFG00000005853 | PPP1R27  | -1.354830188 | 0.002040457 |
| ENSCAFG00000005870 | RASGRP3  | -1.037928066 | 0.006629522 |
| ENSCAFG00000005940 | THSD1    | -1.07328846  | 0.003198475 |
| ENSCAFG00000005960 | LRRN1    | 1.468728589  | 0.018858074 |
| ENSCAFG00000005963 | METTL21C | -4.337630234 | 0.013432947 |
| ENSCAFG00000005965 | FOXO1    | 1.342420559  | 0.014760008 |
| ENSCAFG00000006006 | FASN     | 1.832543195  | 0.002831356 |
| ENSCAFG00000006019 | FREM2    | 1.997135963  | 0.001709181 |
| ENSCAFG00000006022 | EFNB2    | -1.149158656 | 0.00578441  |
| ENSCAFG00000006035 | COL6A6   | 1.373634224  | 0.039451868 |
| ENSCAFG00000006044 | TRPC4    | 1.852366958  | 0.038224436 |
| ENSCAFG00000006052 | RASSF2   | 1.182605057  | 0.033316008 |
| ENSCAFG00000006053 |          | 2.410434605  | 0.000370765 |
| ENSCAFG00000006065 | PRNP     | 1.082986098  | 0.017010501 |
| ENSCAFG00000006086 | PCDHGC5  | 1.034747068  | 0.038947382 |
| ENSCAFG00000006091 | KITLG    | -1.901165541 | 3.12E-13    |
| ENSCAFG00000006100 | DUSP6    | -1.160219218 | 0.000193285 |
| ENSCAFG00000006106 | PCDHB4   | 1.660172265  | 0.029660155 |
| ENSCAFG00000006162 | SMAD9    | 1.642648071  | 0.000366957 |
| ENSCAFG00000006164 | CYP1B1   | 2.486019772  | 0.003558567 |
| ENSCAFG00000006166 |          | -1.312823244 | 0.044772843 |
| ENSCAFG00000006175 | CDC25B   | 1.356247088  | 0.010062323 |
| ENSCAFG00000006215 | POLE     | 1.049985134  | 0.011285828 |
| ENSCAFG00000006231 | DCLK1    | 3.592784876  | 7.82E-06    |
| ENSCAFG00000006234 | ADAM33   | 1.268971644  | 0.015891661 |
| ENSCAFG00000006237 | ACPP     | -1.000504313 | 0.040736556 |
| ENSCAFG00000006250 | SPRY4    | -1.233853027 | 0.004228894 |
| ENSCAFG00000006255 | NBEA     | 1.20256109   | 0.000130403 |
| ENSCAFG00000006264 | PCLO     | 2.615201321  | 0.000357765 |
| ENSCAFG00000006334 | GRTP1    | -1.258628281 | 0.026256716 |
| ENSCAFG00000006381 | SEMA3C   | 1.038521177  | 0.008217059 |
| ENSCAFG00000006392 | ACKR4    | -2.278077277 | 0.026652151 |
| ENSCAFG00000006403 |          | -1.129692789 | 0.034741074 |
| ENSCAFG00000006417 | LZTS3    | -1.088584657 | 0.000948527 |
| ENSCAFG00000006421 | GAS6     | -1.009584253 | 0.003697056 |
| ENSCAFG00000006424 | GXYLT2   | 1.741229308  | 0.000541357 |
| ENSCAFG00000006513 |          | -1.689503788 | 0.021957341 |
| ENSCAFG00000006528 | RASSF7   | 1.720814154  | 0.009060634 |
| ENSCAFG00000006545 |          | -1.255296155 | 0.006582855 |
| ENSCAFG00000006559 | ITPRIPL1 | -1.397851669 | 0.000138061 |
| ENSCAFG00000006563 | EOGT     | -1.053095061 | 0.007320513 |
| ENSCAFG00000006576 | WDFY4    | 1.46324069   | 0.00408773  |
| ENSCAFG00000006607 | DPYSL3   | 2.131571556  | 0.009238841 |
| ENSCAFG00000006608 | CPXM1    | 2.635647338  | 0.015315864 |
| ENSCAFG00000006612 | SUCLG2   | -1.180146674 | 0.000610345 |

|                   |          |              |             |
|-------------------|----------|--------------|-------------|
| ENSCAFG0000006673 | PPP1R3B  | 1.184983714  | 0.024626194 |
| ENSCAFG0000006701 | FLT1     | -1.270143319 | 0.000428565 |
| ENSCAFG0000006723 | SYT9     | 1.245544428  | 0.008990229 |
| ENSCAFG0000006740 | OLFML1   | 1.537237483  | 0.00353556  |
| ENSCAFG0000006745 | PRAG1    | -1.189785906 | 0.024248053 |
| ENSCAFG0000006785 |          | 1.079482911  | 0.04280166  |
| ENSCAFG0000006800 | FZD10    | 1.550658639  | 0.000939887 |
| ENSCAFG0000006804 | PRICKLE2 | 1.04935904   | 0.013934497 |
| ENSCAFG0000006825 | PRR5L    | 2.72886625   | 0.014915091 |
| ENSCAFG0000006840 | LDLRAD3  | 1.386681603  | 0.022896437 |
| ENSCAFG0000006877 | FAM110A  | 1.963890232  | 1.43E-05    |
| ENSCAFG0000006898 | PDHX     | -1.364981399 | 0.011611732 |
| ENSCAFG0000006909 | LMO1     | -1.613763672 | 0.001759839 |
| ENSCAFG0000006930 | TCF15    | -1.553303222 | 0.000161889 |
| ENSCAFG0000006953 | PDGFRL   | 1.100093006  | 0.00622266  |
| ENSCAFG0000006977 | ABTB2    | 1.099258098  | 0.007672371 |
| ENSCAFG0000007036 | CD22     | -1.719470343 | 0.001095637 |
| ENSCAFG0000007045 |          | -1.336876842 | 0.000359083 |
| ENSCAFG0000007079 |          | 1.403281674  | 0.0018381   |
| ENSCAFG0000007082 |          | -2.209785115 | 0.005818422 |
| ENSCAFG0000007261 | ACOX2    | -1.488637855 | 0.022786194 |
| ENSCAFG0000007307 |          | 2.22591806   | 0.013894905 |
| ENSCAFG0000007394 | ABHD6    | -1.190132732 | 0.008254598 |
| ENSCAFG0000007407 |          | 2.660916631  | 0.008270021 |
| ENSCAFG0000007433 | LRP3     | 1.154106235  | 0.016645878 |
| ENSCAFG0000007440 | WDR88    | 4.275295211  | 0.004044658 |
| ENSCAFG0000007453 | KRCC1    | -1.201082411 | 9.38E-06    |
| ENSCAFG0000007486 | CEP89    | 1.428140706  | 6.87E-05    |
| ENSCAFG0000007562 | AMPD3    | 1.849416153  | 0.01014497  |
| ENSCAFG0000007596 | SLC25A4  | -1.210582853 | 0.030785289 |
| ENSCAFG0000007626 | PIK3R1   | 1.067000994  | 0.005057473 |
| ENSCAFG0000007635 | CLSTN2   | 3.207811607  | 1.16E-05    |
| ENSCAFG0000007651 | DTX4     | 1.542997297  | 0.016897439 |
| ENSCAFG0000007653 | ST3GAL5  | 1.573265873  | 0.008203869 |
| ENSCAFG0000007674 | RASA2    | 1.549880689  | 0.007633551 |
| ENSCAFG0000007681 | MFAP3L   | -1.191804083 | 0.000412873 |
| ENSCAFG0000007698 | ZNF827   | 1.181551204  | 0.003497718 |
| ENSCAFG0000007742 | TFDP2    | -1.002106629 | 0.001754311 |
| ENSCAFG0000007750 | CASP3    | 1.769901389  | 0.001471164 |
| ENSCAFG0000007754 | USP47    | -1.090333298 | 3.92E-05    |
| ENSCAFG0000007789 | ARHGAP10 | 1.021474237  | 0.00022129  |
| ENSCAFG0000007805 | OCLN     | -1.073577429 | 0.005938372 |
| ENSCAFG0000007832 | TCF7L1   | 1.147972872  | 0.006259848 |
| ENSCAFG0000007845 | DKK3     | -1.71331393  | 0.022033743 |
| ENSCAFG0000007846 | GBE1     | 1.149584014  | 0.025409592 |
| ENSCAFG0000007847 | TIMM10   | -1.591285768 | 8.16E-05    |
| ENSCAFG0000007860 | CSRNP2   | 1.049811291  | 0.010671638 |
| ENSCAFG0000007863 | ATR      | 1.088782499  | 4.59E-05    |
| ENSCAFG0000007888 | FFAR4    | 2.491315087  | 0.024760419 |
| ENSCAFG0000007893 | RBP4     | 2.002499185  | 0.042251832 |

|                   |             |              |             |
|-------------------|-------------|--------------|-------------|
| ENSCAFG0000007935 | TRPC1       | 1.051945866  | 0.002529282 |
| ENSCAFG0000007945 | PROCR       | 2.330769255  | 2.51E-10    |
| ENSCAFG0000007958 | APLNR       | -1.261332147 | 0.023264241 |
| ENSCAFG0000008028 | SLC9A9      | 1.345211158  | 0.008270911 |
| ENSCAFG0000008062 |             | -1.837269893 | 0.001471419 |
| ENSCAFG0000008063 |             | 1.368933819  | 0.0337881   |
| ENSCAFG0000008159 | PLSCR4      | 1.298203627  | 0.015221206 |
| ENSCAFG0000008164 | TMEM154     | 1.779635354  | 0.011733878 |
| ENSCAFG0000008214 | FHDC1       | 2.895963842  | 4.49E-05    |
| ENSCAFG0000008235 | CPA3        | 2.074229077  | 0.012324675 |
| ENSCAFG0000008256 | RBM12       | 1.18236141   | 8.75E-05    |
| ENSCAFG0000008269 | IL17RB      | -1.120966948 | 0.024398246 |
| ENSCAFG0000008293 | FZD3        | 1.065455904  | 0.0137963   |
| ENSCAFG0000008295 | BTG3        | 1.295858635  | 0.025828207 |
| ENSCAFG0000008296 | CHDH        | -1.173643235 | 0.009088829 |
| ENSCAFG0000008309 |             | -1.43440908  | 0.023136322 |
| ENSCAFG0000008319 | CHODL       | 1.172802739  | 0.016936748 |
| ENSCAFG0000008325 | TM4SF18     | -1.18487751  | 0.037090212 |
| ENSCAFG0000008342 | AGBL2       | 1.945630527  | 0.000652549 |
| ENSCAFG0000008343 | TM4SF1      | -1.140917171 | 0.024735774 |
| ENSCAFG0000008354 | SCARA5      | 1.430062668  | 0.012793785 |
| ENSCAFG0000008391 | HEY1        | -1.008243771 | 0.018293645 |
| ENSCAFG0000008403 |             | -1.495917373 | 0.01247696  |
| ENSCAFG0000008408 | TPD52       | 1.207662589  | 0.014042884 |
| ENSCAFG0000008413 | EPB41L1     | 1.291370076  | 0.008869034 |
| ENSCAFG0000008471 | CCDC142     | 1.34579187   | 0.037734356 |
| ENSCAFG0000008477 | BLNK        | -1.511547355 | 0.032220078 |
| ENSCAFG0000008503 |             | 1.088891507  | 0.023027303 |
| ENSCAFG0000008566 | GUCY1B1     | -1.117284236 | 0.02654305  |
| ENSCAFG0000008597 | ANGPT2      | -2.09122585  | 7.91E-06    |
| ENSCAFG0000008624 | STBD1       | -1.132732768 | 0.039550272 |
| ENSCAFG0000008648 |             | -1.585472155 | 0.004893517 |
| ENSCAFG0000008707 | CKMT2       | -1.513175637 | 0.014869607 |
| ENSCAFG0000008709 | CCDC102A    | -1.009151305 | 1.13E-05    |
| ENSCAFG0000008728 | TET3        | 1.074996219  | 0.020416875 |
| ENSCAFG0000008741 | EPHA3       | -1.457587703 | 0.034203901 |
| ENSCAFG0000008755 | SRC         | 1.483256891  | 0.012127056 |
| ENSCAFG0000008761 | CX3CL1      | -1.631523824 | 0.002692642 |
| ENSCAFG0000008786 | NNAT        | 1.385895771  | 0.017606039 |
| ENSCAFG0000008837 | ANXA3       | -1.724798275 | 0.000125438 |
| ENSCAFG0000008942 | C18H11orf49 | 1.771409836  | 9.50E-06    |
| ENSCAFG0000008977 | LRP4        | 2.637229703  | 4.82E-08    |
| ENSCAFG0000008979 | TMEM150C    | -2.122919049 | 7.42E-08    |
| ENSCAFG0000009005 | CYP26B1     | 6.304114224  | 6.45E-10    |
| ENSCAFG0000009006 | GFM1        | -1.005082533 | 0.002329285 |
| ENSCAFG0000009017 | PPP1R16B    | -1.166128412 | 0.036064706 |
| ENSCAFG0000009026 | NECAB1      | 1.914034765  | 0.004750324 |
| ENSCAFG0000009046 | TPCN1       | 1.026898343  | 0.008569566 |
| ENSCAFG0000009061 | SLC8B1      | 1.213167326  | 0.004684416 |
| ENSCAFG0000009066 | MYOD1       | 1.704728854  | 0.029840809 |

|                   |            |              |             |
|-------------------|------------|--------------|-------------|
| ENSCAFG0000009074 | HOMER1     | -1.107945461 | 0.002120783 |
| ENSCAFG0000009076 | PLBD2      | 2.689637486  | 2.48E-07    |
| ENSCAFG0000009097 | SDSL       | 3.973724233  | 1.31E-07    |
| ENSCAFG0000009110 | MT1E       | 1.684552853  | 0.022942676 |
| ENSCAFG0000009113 |            | 1.662637003  | 0.048575535 |
| ENSCAFG0000009149 | SMIM4      | -1.368540285 | 0.032207007 |
| ENSCAFG0000009232 | AMIGO2     | 1.688808515  | 0.013372996 |
| ENSCAFG0000009271 | CRTAC1     | 2.277882249  | 0.002322052 |
| ENSCAFG0000009282 | CREB3L1    | 2.490627371  | 0.001186478 |
| ENSCAFG0000009333 | CES1       | -2.376497003 | 0.001251065 |
| ENSCAFG0000009337 | TUBB2A     | 3.250224395  | 1.47E-05    |
| ENSCAFG0000009358 | ASNSD1     | -1.144529659 | 0.001513926 |
| ENSCAFG0000009362 | IGSF22     | 8.547874465  | 0.003449753 |
| ENSCAFG0000009389 | NISCH      | 1.016720573  | 0.006632477 |
| ENSCAFG0000009395 | SLC6A2     | -1.919396586 | 0.008599789 |
| ENSCAFG0000009401 | DLL4       | -1.523832158 | 0.000129353 |
| ENSCAFG0000009414 | CHAC1      | 6.469882148  | 0.00023368  |
| ENSCAFG0000009423 | C29H&orf37 | 1.392089379  | 0.004122074 |
| ENSCAFG0000009433 | BAZ2B      | 1.077247347  | 0.01016707  |
| ENSCAFG0000009441 | CD82       | 1.055301224  | 0.043230122 |
| ENSCAFG0000009447 |            | -1.270937746 | 0.014171472 |
| ENSCAFG0000009510 | EXD1       | 1.073223851  | 0.018392605 |
| ENSCAFG0000009546 | SLC5A3     | -1.216509949 | 0.029699281 |
| ENSCAFG0000009552 | IMPG2      | 1.04363922   | 0.026205072 |
| ENSCAFG0000009570 | DSP        | -2.147769814 | 0.042939147 |
| ENSCAFG0000009596 | RUNX1      | 2.563379593  | 0.012764049 |
| ENSCAFG0000009638 | ABCG2      | 1.03213045   | 0.033390791 |
| ENSCAFG0000009641 | PI3        | 4.966087179  | 0.0139996   |
| ENSCAFG0000009653 | DOP1B      | 2.080276665  | 0.011485096 |
| ENSCAFG0000009659 | HR         | 1.976192906  | 0.027128185 |
| ENSCAFG0000009663 | SCD        | 1.467497752  | 0.005905574 |
| ENSCAFG0000009673 |            | -1.451656986 | 0.000133089 |
| ENSCAFG0000009680 | GCNT2      | -1.212452645 | 0.003150768 |
| ENSCAFG0000009708 |            | 1.326485815  | 0.002304302 |
| ENSCAFG0000009717 | DNAH1      | 1.797251164  | 0.01882807  |
| ENSCAFG0000009721 | ALCAM      | 1.134756465  | 0.039295402 |
| ENSCAFG0000009735 | PLA2G4B    | 2.734643432  | 0.000289169 |
| ENSCAFG0000009744 | ADAMTS20   | 1.271793398  | 0.000597472 |
| ENSCAFG0000009765 | CASQ2      | 1.110948256  | 0.023375595 |
| ENSCAFG0000009777 | NAV2       | 2.360013976  | 7.44E-05    |
| ENSCAFG0000009781 | HERC6      | 1.24440049   | 0.001346425 |
| ENSCAFG0000009820 | NOS1       | -2.121300616 | 0.023904112 |
| ENSCAFG0000009840 | FAM13A     | 1.110540351  | 0.013996989 |
| ENSCAFG0000009869 | EHD4       | 1.260345827  | 0.014855076 |
| ENSCAFG0000009881 | ALAS1      | -1.544686968 | 0.002904226 |
| ENSCAFG0000009912 | ERG        | -1.034168396 | 0.001860039 |
| ENSCAFG0000009938 | TENT4B     | -1.119489303 | 0.003678487 |
| ENSCAFG0000009951 | SPAG17     | 7.642547816  | 1.46E-06    |
| ENSCAFG0000009961 | ADAMTS15   | 1.937195182  | 0.001201022 |
| ENSCAFG0000009978 | ETS2       | 1.883296077  | 3.39E-07    |



|                    |            |              |             |
|--------------------|------------|--------------|-------------|
| ENSCAFG00000010049 | GFRA2      | 1.471557592  | 0.022028051 |
| ENSCAFG00000010090 | IGF2       | 3.240827274  | 1.30E-05    |
| ENSCAFG00000010111 | NIPSNAP2   | -1.105617086 | 0.008220459 |
| ENSCAFG00000010121 | CD81       | 1.393565596  | 4.59E-06    |
| ENSCAFG00000010131 | GBF1       | 1.176656593  | 0.002586937 |
| ENSCAFG00000010148 | SLC45A3    | 4.63220527   | 2.36E-05    |
| ENSCAFG00000010151 | NHLRC1     | -1.053782232 | 0.026699878 |
| ENSCAFG00000010175 | CDH22      | -1.376839677 | 0.019541391 |
| ENSCAFG00000010202 |            | -1.183433224 | 0.044776213 |
| ENSCAFG00000010225 | PHKB       | -1.025976526 | 0.003741546 |
| ENSCAFG00000010239 | IKBKE      | 1.242696351  | 0.032746758 |
| ENSCAFG00000010254 | SFXN2      | 2.064374068  | 0.000259649 |
| ENSCAFG00000010264 | WBP1L      | 1.075959557  | 0.001791183 |
| ENSCAFG00000010274 | CHI3L1     | 5.489696854  | 0.000369718 |
| ENSCAFG00000010284 | GPLD1      | -1.389582331 | 0.036662501 |
| ENSCAFG00000010285 | ABCG1      | 2.572418504  | 0.000350336 |
| ENSCAFG00000010288 | MYBPH      | 5.729872752  | 5.01E-05    |
| ENSCAFG00000010290 |            | 1.127323694  | 0.012905004 |
| ENSCAFG00000010292 | DOCK10     | 1.560065049  | 0.019819148 |
| ENSCAFG00000010298 | ADORA1     | 3.527204208  | 2.11E-05    |
| ENSCAFG00000010304 | ETS1       | -1.325434595 | 0.000238081 |
| ENSCAFG00000010309 | MYOG       | 1.52088885   | 0.009245696 |
| ENSCAFG00000010395 | ADAMTS16   | 2.267385236  | 0.042507845 |
| ENSCAFG00000010423 | COL4A4     | 2.911724806  | 3.71E-08    |
| ENSCAFG00000010426 | COL4A3     | 3.91461618   | 1.36E-12    |
| ENSCAFG00000010432 | TIRAP      | -1.129563795 | 0.00029239  |
| ENSCAFG00000010526 | FIGN       | 1.455917216  | 0.003215102 |
| ENSCAFG00000010530 | CCDC80     | 1.597960741  | 0.001284061 |
| ENSCAFG00000010588 | MARCKSL1   | 1.800448811  | 0.022793028 |
| ENSCAFG00000010602 | ELF3       | 6.224700143  | 1.17E-06    |
| ENSCAFG00000010619 | BICD1      | 2.088271111  | 0.002232276 |
| ENSCAFG00000010640 | SLC2A10    | 1.190300409  | 0.045304033 |
| ENSCAFG00000010652 | STK17B     | 1.15020727   | 0.029263679 |
| ENSCAFG00000010654 | AGPAT3     | -1.181973406 | 0.002425076 |
| ENSCAFG00000010656 | FAM167B    | 1.57858212   | 0.003504725 |
| ENSCAFG00000010698 | LTO1       | -1.016421776 | 0.00076533  |
| ENSCAFG00000010700 | CCND1      | -1.311346692 | 0.032616124 |
| ENSCAFG00000010752 | C25H2orf72 | -1.824929794 | 0.007534969 |
| ENSCAFG00000010758 | MAP2K6     | 1.574037058  | 0.008174431 |
| ENSCAFG00000010790 | SLC9B1     | 2.992770305  | 0.001611879 |
| ENSCAFG00000010798 | TNNT2      | 3.137959501  | 0.003047652 |
| ENSCAFG00000010815 | TGFB2      | 1.494601518  | 0.003902591 |
| ENSCAFG00000010825 |            | 3.396236737  | 0.003492806 |
| ENSCAFG00000010829 |            | 6.069163529  | 0.000844402 |
| ENSCAFG00000010840 | ADRA2A     | 2.027886781  | 0.016477477 |
| ENSCAFG00000010877 | ABCA9      | 1.163571591  | 0.009129961 |
| ENSCAFG00000010891 | PGPEP1L    | 1.114772082  | 0.020040164 |
| ENSCAFG00000010895 |            | 1.53235375   | 0.013965625 |
| ENSCAFG00000010923 | HIST1H1C   | 1.473932341  | 0.000325281 |
| ENSCAFG00000010925 | HFE        | 1.131300724  | 0.008973576 |

|                    |            |              |             |
|--------------------|------------|--------------|-------------|
| ENSCAFG00000010931 | GTPBP6     | -1.156443542 | 0.009157401 |
| ENSCAFG00000010936 | NPNT       | 2.260581185  | 0.005488884 |
| ENSCAFG00000010942 | CCDC91     | -1.22278308  | 0.001865045 |
| ENSCAFG00000010977 | TIMMDC1    | -1.013064484 | 0.005838218 |
| ENSCAFG00000010982 | FAM20A     | 1.327735982  | 0.004298893 |
| ENSCAFG00000010988 | CFAP410    | 1.201302105  | 7.94E-05    |
| ENSCAFG00000011000 | C37H2orf69 | -1.205066002 | 0.00503365  |
| ENSCAFG00000011046 | BCL9       | 1.312872289  | 0.001013329 |
| ENSCAFG00000011067 | DHRX       | -1.02456993  | 0.011727614 |
| ENSCAFG00000011069 | GJA5       | -1.76094913  | 0.000940751 |
| ENSCAFG00000011086 | SLC16A6    | 3.216273919  | 0.002852035 |
| ENSCAFG00000011087 | DKK2       | 2.016657527  | 0.00841529  |
| ENSCAFG00000011089 | ARNTL2     | 2.423575888  | 0.026410767 |
| ENSCAFG00000011107 | STK32C     | -2.1379274   | 0.003829866 |
| ENSCAFG00000011113 | GYG2       | 2.842135071  | 0.046644226 |
| ENSCAFG00000011147 | ESAM       | -1.075205388 | 0.001215541 |
| ENSCAFG00000011197 | MMP14      | 1.485559569  | 0.0092262   |
| ENSCAFG00000011227 | PRSS56     | 4.820232274  | 0.000758261 |
| ENSCAFG00000011283 | CHRND      | 4.316764066  | 0.001712996 |
| ENSCAFG00000011356 | VWA5A      | 1.359952119  | 0.0390231   |
| ENSCAFG00000011368 |            | 1.480762529  | 0.011863031 |
| ENSCAFG00000011378 | ANKRD34A   | 1.637426544  | 0.027794058 |
| ENSCAFG00000011426 | PTGIS      | 2.00997258   | 0.003542429 |
| ENSCAFG00000011432 | MAPKAPK2   | -1.027462576 | 0.000238795 |
| ENSCAFG00000011489 | AMT        | 1.421224363  | 0.000193361 |
| ENSCAFG00000011513 | ABLIM1     | 1.73670291   | 0.026136008 |
| ENSCAFG00000011524 | PTPRU      | 2.453559333  | 0.002965023 |
| ENSCAFG00000011532 | EGF        | 1.47127452   | 0.005762823 |
| ENSCAFG00000011533 | TARBP1     | 1.065472211  | 0.000131968 |
| ENSCAFG00000011534 | ACAN       | -4.36642322  | 0.002820702 |
| ENSCAFG00000011584 | GRAMD1B    | 1.398465266  | 0.011439968 |
| ENSCAFG00000011603 | GRK3       | -1.391952979 | 0.00135187  |
| ENSCAFG00000011605 | EFS        | 1.922066237  | 0.000698606 |
| ENSCAFG00000011637 | IQCB1      | 1.003506048  | 0.001391803 |
| ENSCAFG00000011646 | ZFH2       | 1.3352936    | 0.005329075 |
| ENSCAFG00000011652 | MTMR11     | 1.707003892  | 0.008577743 |
| ENSCAFG00000011662 | PRPS2      | -1.216500408 | 0.033737154 |
| ENSCAFG00000011744 | LAMB2      | 1.91057833   | 2.00E-05    |
| ENSCAFG00000011772 | EGLN1      | -1.064307644 | 0.000244409 |
| ENSCAFG00000011823 | MN1        | 1.711449202  | 0.000564741 |
| ENSCAFG00000011849 | TTC28      | 1.030172217  | 0.034679385 |
| ENSCAFG00000011911 | COL6A1     | 1.170613861  | 0.017102371 |
| ENSCAFG00000011915 |            | 1.166636411  | 0.010333181 |
| ENSCAFG00000011929 | CLK1       | 1.02530789   | 0.013826706 |
| ENSCAFG00000011952 |            | -1.286892757 | 0.014651859 |
| ENSCAFG00000011977 | KIF7       | 1.308554994  | 0.000142129 |
| ENSCAFG00000011986 | PLIN1      | 3.405953065  | 0.006111997 |
| ENSCAFG00000012013 | ANPEP      | 1.834642459  | 0.007660245 |
| ENSCAFG00000012022 |            | 1.693305698  | 0.0025583   |
| ENSCAFG00000012065 | PCK1       | 3.931907027  | 0.002848128 |

|                    |          |              |             |
|--------------------|----------|--------------|-------------|
| ENSCAFG00000012068 | AGT      | 3.307821786  | 0.012924073 |
| ENSCAFG00000012082 | SEMA4B   | 1.228537847  | 0.023335708 |
| ENSCAFG00000012085 | ABCC5    | 2.401646517  | 0.000179174 |
| ENSCAFG00000012095 | AHDC1    | 1.437749831  | 1.51E-06    |
| ENSCAFG00000012098 | PGBD5    | -1.591822883 | 0.020880289 |
| ENSCAFG00000012102 | SFXN4    | -1.131935957 | 0.000627187 |
| ENSCAFG00000012152 | GABBR1   | 1.544143648  | 0.001274261 |
| ENSCAFG00000012181 | ACTC1    | 3.772649425  | 0.010254741 |
| ENSCAFG00000012182 | TGM1     | 3.044524665  | 5.70E-06    |
| ENSCAFG00000012222 |          | 1.352016222  | 0.002434643 |
| ENSCAFG00000012286 | STRADB   | -1.203879649 | 0.006924966 |
| ENSCAFG00000012290 | SFN      | 1.462504245  | 0.004334308 |
| ENSCAFG00000012306 | SPTBN2   | -1.086731937 | 0.021915638 |
| ENSCAFG00000012328 | PRSS12   | 1.247157735  | 0.005394858 |
| ENSCAFG00000012333 | PPP1R3D  | -1.292859347 | 0.023474448 |
| ENSCAFG00000012345 | SEC24D   | 1.21464725   | 0.032736648 |
| ENSCAFG00000012376 | VASH2    | 2.084699386  | 0.003572492 |
| ENSCAFG00000012385 | BLM      | 1.504948461  | 0.008381999 |
| ENSCAFG00000012405 | RBM14    | 1.043224607  | 0.002512687 |
| ENSCAFG00000012428 | HES6     | 1.36513027   | 0.041069199 |
| ENSCAFG00000012449 | USP53    | 1.7655839    | 6.49E-07    |
| ENSCAFG00000012460 | SMYD2    | -1.16803138  | 0.00614654  |
| ENSCAFG00000012473 | SEMA6C   | 1.045690181  | 0.000233906 |
| ENSCAFG00000012517 | TMOD4    | -1.118371009 | 0.02020104  |
| ENSCAFG00000012525 | MUC13    | 3.62251399   | 0.006464476 |
| ENSCAFG00000012558 |          | 1.046927218  | 0.003719884 |
| ENSCAFG00000012619 | MGST1    | 2.512004864  | 0.03228505  |
| ENSCAFG00000012623 | STX1A    | 1.202019248  | 0.034886458 |
| ENSCAFG00000012661 | RFX5     | 1.075017609  | 0.002753632 |
| ENSCAFG00000012685 | PLXNB1   | 1.877043947  | 4.78E-05    |
| ENSCAFG00000012708 | SMARCD2  | 1.022505923  | 3.35E-05    |
| ENSCAFG00000012709 | GATA5    | 1.804033874  | 0.021097727 |
| ENSCAFG00000012716 | ARHGAP30 | 1.087262992  | 0.005409337 |
| ENSCAFG00000012742 | MTFP1    | -1.929641457 | 0.012633578 |
| ENSCAFG00000012748 | LHPP     | 1.007883176  | 0.011967461 |
| ENSCAFG00000012803 | RIN1     | 3.155806278  | 1.42E-06    |
| ENSCAFG00000012824 | SCN4B    | -1.59412924  | 0.002692617 |
| ENSCAFG00000012829 | TMPRSS4  | -2.176554135 | 0.04555644  |
| ENSCAFG00000012834 | SLC35E4  | 1.279877824  | 0.000202196 |
| ENSCAFG00000012904 | CDK1     | 1.762730567  | 0.001338037 |
| ENSCAFG00000012915 | BTNL9    | -1.015357318 | 0.006765806 |
| ENSCAFG00000012918 | TNK2     | 1.596658563  | 0.000130438 |
| ENSCAFG00000012925 | PHKA2    | 1.382655474  | 0.032619048 |
| ENSCAFG00000012952 | VPS37D   | 2.081263489  | 0.002561229 |
| ENSCAFG00000012963 |          | 1.084637453  | 0.034016937 |
| ENSCAFG00000013011 | PDE8A    | -1.165578579 | 0.000121594 |
| ENSCAFG00000013012 | THAP4    | -1.020061609 | 0.021456515 |
| ENSCAFG00000013020 | STMN3    | 1.497662067  | 0.027657812 |
| ENSCAFG00000013030 | PDHA1    | -1.282630014 | 0.023753027 |
| ENSCAFG00000013039 | ZNF365   | -1.070865273 | 0.005457647 |

|                    |            |              |             |
|--------------------|------------|--------------|-------------|
| ENSCAFG00000013221 |            | -1.104588923 | 0.023459795 |
| ENSCAFG00000013256 | MRC2       | 1.08775639   | 0.044373466 |
| ENSCAFG00000013278 |            | 2.045823956  | 0.013895827 |
| ENSCAFG00000013283 | CHRNA1     | 3.815468255  | 3.47E-05    |
| ENSCAFG00000013297 | IGF2BP2    | 1.430996439  | 0.002109281 |
| ENSCAFG00000013305 | DNAJC12    | -1.329968266 | 0.020555191 |
| ENSCAFG00000013322 | APOC3      | -2.511748825 | 7.58E-05    |
| ENSCAFG00000013353 | MGST3      | -1.316771749 | 0.022345483 |
| ENSCAFG00000013367 | HIP1       | 1.450538768  | 0.002978759 |
| ENSCAFG00000013368 | APOD       | -1.665651682 | 0.006079384 |
| ENSCAFG00000013394 | CXHXorf58  | -1.24322466  | 0.030126721 |
| ENSCAFG00000013423 | FUOM       | -2.263366815 | 1.50E-05    |
| ENSCAFG00000013427 | CALY       | -2.579974164 | 0.004686548 |
| ENSCAFG00000013483 | TMEM120A   | -1.405061093 | 7.87E-05    |
| ENSCAFG00000013489 | UCK2       | 1.936783208  | 3.27E-06    |
| ENSCAFG00000013496 |            | -1.280655828 | 0.001513844 |
| ENSCAFG00000013515 |            | -1.222080428 | 0.028528991 |
| ENSCAFG00000013521 | POLA1      | 1.384198517  | 3.01E-05    |
| ENSCAFG00000013600 | PTH1R      | 1.231973459  | 0.022990657 |
| ENSCAFG00000013627 | HHIPL2     | -1.825264633 | 0.036689873 |
| ENSCAFG00000013694 | ADIPOQ     | 3.534335496  | 0.008276276 |
| ENSCAFG00000013716 | LRRC2      | -1.091034562 | 0.000697515 |
| ENSCAFG00000013723 | SHF        | 2.022218768  | 0.008626674 |
| ENSCAFG00000013728 | MYL4       | 3.638724975  | 0.002947883 |
| ENSCAFG00000013756 | CLEC14A    | -1.417220425 | 4.34E-05    |
| ENSCAFG00000013774 | MAP3K14    | 1.213088428  | 0.002802256 |
| ENSCAFG00000013844 | NCAM1      | 3.120117838  | 0.001500823 |
| ENSCAFG00000013874 | CXCR6      | -1.618874398 | 0.002416871 |
| ENSCAFG00000013904 | BCL6       | 1.309572206  | 0.000779892 |
| ENSCAFG00000013961 | TP63       | 1.169710929  | 0.000398766 |
| ENSCAFG00000013981 | RALGPS2    | 1.536614945  | 0.022755965 |
| ENSCAFG00000013990 |            | 1.169896005  | 0.016617495 |
| ENSCAFG00000014005 | ANGPTL1    | 1.032044708  | 0.007823735 |
| ENSCAFG00000014016 | DLAT       | -1.192381172 | 0.045489255 |
| ENSCAFG00000014017 | BATF2      | 1.095116953  | 0.009789086 |
| ENSCAFG00000014049 | CLEC3B     | 1.523209988  | 0.000173175 |
| ENSCAFG00000014051 | TSPAN7     | 1.02608544   | 3.83E-05    |
| ENSCAFG00000014054 | ACHE       | 2.39967239   | 0.005847406 |
| ENSCAFG00000014100 | SGPL1      | 1.235415015  | 0.000353075 |
| ENSCAFG00000014124 | CHCHD10    | -1.597283739 | 0.010210759 |
| ENSCAFG00000014131 | C18H7orf57 | 1.54160873   | 0.019549359 |
| ENSCAFG00000014220 | C1R        | 1.025010153  | 0.025651709 |
| ENSCAFG00000014237 | L2HGDH     | -1.55661932  | 0.014647836 |
| ENSCAFG00000014308 | ALAS2      | 2.022795179  | 4.53E-09    |
| ENSCAFG00000014310 | APEX2      | 2.030600222  | 2.09E-07    |
| ENSCAFG00000014319 | UNC5B      | -1.142377114 | 0.005990588 |
| ENSCAFG00000014322 | PCOLCE     | 1.205708639  | 0.024618058 |
| ENSCAFG00000014323 | EPHB2      | 2.391796378  | 0.007936554 |
| ENSCAFG00000014338 | NRXN2      | 2.959795843  | 3.23E-05    |
| ENSCAFG00000014343 | SAP25      | 2.481888236  | 0.007783869 |

|                    |          |              |             |
|--------------------|----------|--------------|-------------|
| ENSCAFG00000014410 | CHST3    | 1.156284932  | 0.012681418 |
| ENSCAFG00000014413 | SPOCK2   | -1.120271208 | 0.002462955 |
| ENSCAFG00000014435 | MAOA     | 1.462094265  | 0.000389039 |
| ENSCAFG00000014443 | TSC22D4  | 1.17473527   | 2.89E-05    |
| ENSCAFG00000014448 | ZNF804A  | 3.324081824  | 8.51E-05    |
| ENSCAFG00000014455 | ESRRA    | -1.265424457 | 0.000372056 |
| ENSCAFG00000014474 | IGFBP5   | 2.440585471  | 1.26E-08    |
| ENSCAFG00000014476 | MEOX1    | -1.138240071 | 0.00555886  |
| ENSCAFG00000014497 |          | 1.239140592  | 0.019829173 |
| ENSCAFG00000014548 | FBN1     | 1.235919422  | 0.038067722 |
| ENSCAFG00000014551 | GAL3ST4  | 1.729897576  | 0.013455288 |
| ENSCAFG00000014554 | ACOX3    | -1.129390922 | 0.001646278 |
| ENSCAFG00000014568 |          | 1.00599797   | 0.00182064  |
| ENSCAFG00000014570 | ACAT1    | -1.035864976 | 0.002820895 |
| ENSCAFG00000014582 | SERPINI1 | 1.693460531  | 0.03456703  |
| ENSCAFG00000014583 | CPZ      | 5.329320522  | 0.000221795 |
| ENSCAFG00000014591 | TRPT1    | -1.294659246 | 0.027885272 |
| ENSCAFG00000014595 | PYGL     | 1.518344233  | 0.029492942 |
| ENSCAFG00000014600 | BRCA1    | 1.416407049  | 0.000149878 |
| ENSCAFG00000014604 | NUDT13   | -1.018056246 | 0.007168375 |
| ENSCAFG00000014616 | COMP     | -5.740289206 | 0.007738818 |
| ENSCAFG00000014627 |          | 1.24489717   | 0.004098713 |
| ENSCAFG00000014668 | SLC35F2  | -1.328482258 | 0.028279613 |
| ENSCAFG00000014679 | PLEKHH3  | 1.129808878  | 0.01225267  |
| ENSCAFG00000014767 | SLC9A7   | 1.569963702  | 0.002519878 |
| ENSCAFG00000014812 | COL3A1   | 2.592138197  | 7.42E-05    |
| ENSCAFG00000014831 | SH3BP2   | 1.577286613  | 0.002440028 |
| ENSCAFG00000014837 | COL5A2   | 1.677984988  | 0.005884364 |
| ENSCAFG00000014838 | GRIA4    | 1.938506355  | 0.000341434 |
| ENSCAFG00000014923 | FGF7     | 3.412306098  | 3.66E-06    |
| ENSCAFG00000014968 |          | 1.234764568  | 0.000249656 |
| ENSCAFG00000014978 |          | 2.333590538  | 1.59E-07    |
| ENSCAFG00000015009 | MAST3    | 1.311285718  | 0.008373248 |
| ENSCAFG00000015013 | LGALS3   | 1.228948364  | 0.016134212 |
| ENSCAFG00000015078 | FAM184B  | 2.420010828  | 7.78E-06    |
| ENSCAFG00000015091 | LGALS12  | 3.211561178  | 0.000994195 |
| ENSCAFG00000015196 | SCNN1A   | 1.477010439  | 0.007560579 |
| ENSCAFG00000015203 | PLEKHG6  | 1.354786785  | 0.031915668 |
| ENSCAFG00000015209 | TUBA4A   | -2.085553592 | 2.82E-05    |
| ENSCAFG00000015217 |          | -2.109544247 | 1.43E-05    |
| ENSCAFG00000015233 | PROM1    | -1.623183312 | 0.002747785 |
| ENSCAFG00000015235 | SLC19A2  | -1.100735424 | 0.028790754 |
| ENSCAFG00000015257 | ANO2     | 1.879028699  | 2.00E-06    |
| ENSCAFG00000015272 | FGFBP1   | -3.536343867 | 2.28E-05    |
| ENSCAFG00000015298 | CD38     | -1.182073932 | 0.006225598 |
| ENSCAFG00000015320 | NDUFA9   | -1.05069387  | 0.019828262 |
| ENSCAFG00000015360 | GLDN     | 1.143461561  | 0.043070378 |
| ENSCAFG00000015427 | ZNF503   | 2.014152001  | 0.000243553 |
| ENSCAFG00000015430 | ABHD8    | -1.117610208 | 0.046438985 |
| ENSCAFG00000015484 | WSCD1    | -1.438262849 | 0.001298777 |

|                    |          |              |             |
|--------------------|----------|--------------|-------------|
| ENSCAFG00000015512 | POU2F1   | 1.13302006   | 0.029099661 |
| ENSCAFG00000015539 | PAX7     | 1.395532008  | 0.0013233   |
| ENSCAFG00000015625 | FMN2     | 1.36151607   | 0.001317236 |
| ENSCAFG00000015662 | GNB5     | -1.039096649 | 0.001076432 |
| ENSCAFG00000015695 | PRKCH    | -1.248484833 | 0.000306475 |
| ENSCAFG00000015731 | ZNF385C  | 4.692270181  | 6.99E-06    |
| ENSCAFG00000015788 | B4GALNT3 | 2.636017186  | 0.010793726 |
| ENSCAFG00000015878 | UCHL1    | 1.546077843  | 0.005539765 |
| ENSCAFG00000015920 | HAP1     | 5.043410399  | 7.96E-05    |
| ENSCAFG00000015936 | EPHA4    | -1.433980184 | 0.000185468 |
| ENSCAFG00000015943 | PRTG     | 1.444034917  | 0.016455217 |
| ENSCAFG00000015968 | BCL6B    | -1.067609199 | 0.030692266 |
| ENSCAFG00000016022 | KLB      | 2.546535453  | 0.027548092 |
| ENSCAFG00000016036 |          | 7.016258609  | 0.049101968 |
| ENSCAFG00000016072 |          | 1.103191687  | 0.011734775 |
| ENSCAFG00000016142 | TMEM82   | 1.324093088  | 0.007983772 |
| ENSCAFG00000016192 | SDK1     | 1.971691982  | 0.01024194  |
| ENSCAFG00000016225 | ACAP1    | 1.506539113  | 0.000457593 |
| ENSCAFG00000016298 | TMEM102  | 1.1467289    | 0.007763606 |
| ENSCAFG00000016338 | KAZN     | 1.219066392  | 0.02430905  |
| ENSCAFG00000016357 | DBN1     | 1.328042703  | 0.004904397 |
| ENSCAFG00000016368 | PNMT     | 1.466302323  | 0.024897178 |
| ENSCAFG00000016410 | PLEKHH1  | 2.73853123   | 3.36E-05    |
| ENSCAFG00000016423 | PIGH     | -1.152810022 | 0.00264517  |
| ENSCAFG00000016453 | ADGRL1   | 1.307586207  | 0.046507597 |
| ENSCAFG00000016465 | MAGED2   | 1.263446026  | 6.26E-05    |
| ENSCAFG00000016476 | PFKFB1   | -2.045195457 | 0.028672372 |
| ENSCAFG00000016518 | FGFR4    | 1.145955705  | 0.00945188  |
| ENSCAFG00000016541 | ZNF346   | 1.273397861  | 2.96E-05    |
| ENSCAFG00000016550 | ASB12    | -1.234678707 | 0.036824815 |
| ENSCAFG00000016590 | FBXO2    | 2.934905735  | 0.007266281 |
| ENSCAFG00000016596 | DISP3    | 1.705085064  | 0.000168437 |
| ENSCAFG00000016602 | SMOC1    | 1.299880856  | 0.038337447 |
| ENSCAFG00000016615 | MRI1     | 1.149782024  | 0.011404642 |
| ENSCAFG00000016671 | CCDC189  | 1.052591409  | 0.008436979 |
| ENSCAFG00000016718 | HRH2     | 2.426529023  | 0.016221075 |
| ENSCAFG00000016736 | FBXL19   | 1.132719552  | 0.010898339 |
| ENSCAFG00000016757 | CPLX1    | -1.246810011 | 0.033420048 |
| ENSCAFG00000016769 | NES      | 1.905412123  | 0.002378304 |
| ENSCAFG00000016828 | COPZ2    | 1.028632919  | 0.036360494 |
| ENSCAFG00000016850 | GDPD2    | 1.116527742  | 0.021292864 |
| ENSCAFG00000016880 | ATP5MC1  | -1.290162435 | 0.015019756 |
| ENSCAFG00000016928 | ALOX15B  | 6.16785603   | 0.001562234 |
| ENSCAFG00000016983 | RAB8B    | 1.390517014  | 0.000339427 |
| ENSCAFG00000016984 | PER1     | 1.287908041  | 0.023896548 |
| ENSCAFG00000017008 | AURKB    | 1.365287459  | 0.006146469 |
| ENSCAFG00000017015 | CTC1     | 1.105258943  | 0.000215681 |
| ENSCAFG00000017018 | COL1A1   | 3.968024002  | 3.71E-05    |
| ENSCAFG00000017050 | ACSF2    | 1.032690896  | 0.001570815 |
| ENSCAFG00000017064 | CHAD     | -3.034747298 | 0.04528591  |

|                    |          |              |             |
|--------------------|----------|--------------|-------------|
| ENSCAFG00000017099 | SYCE2    | -1.635504004 | 0.042733856 |
| ENSCAFG00000017137 | TENM2    | 3.168026096  | 0.01568875  |
| ENSCAFG00000017138 | CILP     | 2.340963786  | 0.045863276 |
| ENSCAFG00000017160 | IGDCC4   | 1.611713842  | 0.000887137 |
| ENSCAFG00000017182 | SHE      | -1.006177547 | 0.001510638 |
| ENSCAFG00000017184 | IL6R     | -1.029822456 | 0.000192596 |
| ENSCAFG00000017221 |          | 1.222681832  | 0.045185421 |
| ENSCAFG00000017296 | RNF145   | 1.226273609  | 9.04E-05    |
| ENSCAFG00000017329 | FLRT2    | 1.302922919  | 4.29E-05    |
| ENSCAFG00000017334 | ECSIT    | -1.003520116 | 0.024607651 |
| ENSCAFG00000017357 | ADAM19   | 1.226384993  | 0.013534516 |
| ENSCAFG00000017369 | PCTP     | -1.117613987 | 0.033841182 |
| ENSCAFG00000017409 | AKAP1    | -1.10400603  | 0.0014909   |
| ENSCAFG00000017428 | SWSAP1   | 1.371982025  | 0.008409668 |
| ENSCAFG00000017447 | IL4R     | 1.248343849  | 0.022922305 |
| ENSCAFG00000017464 | MKS1     | 1.260077764  | 0.000686005 |
| ENSCAFG00000017615 | ST8SIA5  | -1.236747114 | 0.005677044 |
| ENSCAFG00000017616 | LARP6    | 1.362183971  | 0.003800504 |
| ENSCAFG00000017623 | LRRC49   | 1.198437276  | 0.023288841 |
| ENSCAFG00000017635 | RNF165   | 1.158703871  | 0.046442703 |
| ENSCAFG00000017646 | SERPINA1 | -1.174885668 | 0.024622457 |
| ENSCAFG00000017705 | ARMCX2   | 2.602599203  | 9.83E-05    |
| ENSCAFG00000017775 | GPRASP1  | 1.501415882  | 0.021983163 |
| ENSCAFG00000017807 | CRYM     | 2.825829237  | 0.031597899 |
| ENSCAFG00000017820 | CD276    | 1.441143737  | 0.002608374 |
| ENSCAFG00000017845 | DHRS11   | -1.215720734 | 0.046373754 |
| ENSCAFG00000017849 | MRM1     | -1.321851241 | 0.002475274 |
| ENSCAFG00000017883 | NRK      | 4.56944269   | 2.99E-09    |
| ENSCAFG00000017907 | GM2A     | 1.12907133   | 0.036952483 |
| ENSCAFG00000017937 | CYP1A1   | -3.702677255 | 0.000232808 |
| ENSCAFG00000017952 | ACSM3    | 1.819467539  | 0.018952127 |
| ENSCAFG00000017953 | MORC4    | 1.129584494  | 0.002177112 |
| ENSCAFG00000018005 | MAN2C1   | 1.25661649   | 0.001797728 |
| ENSCAFG00000018016 | COL4A6   | 1.458823574  | 0.045189856 |
| ENSCAFG00000018020 | COL4A5   | 1.635057893  | 0.014631745 |
| ENSCAFG00000018047 |          | 2.160675078  | 0.016470294 |
| ENSCAFG00000018051 | DSG2     | 1.417607614  | 0.02039699  |
| ENSCAFG00000018067 | RCOR1    | 1.068591304  | 0.005157855 |
| ENSCAFG00000018078 |          | -1.074331588 | 0.012162706 |
| ENSCAFG00000018117 | CHRD1    | 2.352323782  | 0.000891988 |
| ENSCAFG00000018127 | TMC7     | 1.18221282   | 0.039064479 |
| ENSCAFG00000018175 | CAPN6    | 2.00326409   | 0.000133598 |
| ENSCAFG00000018180 | ANKRD29  | -1.163002828 | 0.016331406 |
| ENSCAFG00000018197 | ABCC6    | 1.653929939  | 0.030537908 |
| ENSCAFG00000018238 | TIGD6    | 1.167965054  | 0.016284621 |
| ENSCAFG00000018254 | GREB1L   | 1.060288136  | 0.000784847 |
| ENSCAFG00000018272 | KLHL13   | 1.656963535  | 6.08E-06    |
| ENSCAFG00000018277 |          | 2.255816402  | 0.003192217 |
| ENSCAFG00000018323 | ABLIM3   | -1.34203927  | 5.97E-05    |
| ENSCAFG00000018360 |          | 3.632723822  | 0.001075597 |

|                    |          |              |             |
|--------------------|----------|--------------|-------------|
| ENSCAFG00000018405 | FST      | 4.433409456  | 5.60E-10    |
| ENSCAFG00000018413 | BTBD6    | -1.085046017 | 0.006204257 |
| ENSCAFG00000018415 | MOCS2    | -1.083278522 | 0.033137482 |
| ENSCAFG00000018422 | FBN3     | 1.265439091  | 0.015707351 |
| ENSCAFG00000018436 | SREBF1   | 1.042122545  | 0.005803952 |
| ENSCAFG00000018457 | NT5M     | -2.678846074 | 5.02E-06    |
| ENSCAFG00000018461 | TMEM255A | 1.139670736  | 0.00725969  |
| ENSCAFG00000018506 | ANGPTL4  | 1.470240237  | 0.042568829 |
| ENSCAFG00000018527 | PRAM1    | 2.267653354  | 0.002051124 |
| ENSCAFG00000018556 | WDR78    | 1.068222779  | 0.019732746 |
| ENSCAFG00000018586 |          | 1.2615627    | 0.011231598 |
| ENSCAFG00000018591 | ARHGAP28 | 1.078779418  | 0.044040402 |
| ENSCAFG00000018621 | CACHD1   | 1.342444767  | 0.002252598 |
| ENSCAFG00000018622 | DAB2     | 1.23392926   | 0.02486107  |
| ENSCAFG00000018625 | C3       | 1.77318267   | 0.028217786 |
| ENSCAFG00000018629 | WSB1     | 1.256482361  | 0.00340602  |
| ENSCAFG00000018641 | LGALS9   | -1.247576154 | 0.003849405 |
| ENSCAFG00000018643 | SLC25A23 | 1.637985631  | 0.003785276 |
| ENSCAFG00000018654 | PRR32    | 2.403978145  | 0.04992427  |
| ENSCAFG00000018672 | VTN      | -1.139791483 | 0.034406813 |
| ENSCAFG00000018702 | EFCAB7   | -2.524855109 | 9.40E-07    |
| ENSCAFG00000018713 | UNC119   | -1.29224736  | 0.030674464 |
| ENSCAFG00000018761 | PIEZO2   | 2.189773568  | 0.028699958 |
| ENSCAFG00000018785 | ARHGAP36 | 4.498505928  | 1.05E-07    |
| ENSCAFG00000018787 | GNAL     | -3.282201833 | 0.000112493 |
| ENSCAFG00000018792 |          | 1.164728391  | 0.003547974 |
| ENSCAFG00000018812 |          | -1.201361383 | 0.003990348 |
| ENSCAFG00000018825 |          | 1.612554976  | 0.022979474 |
| ENSCAFG00000018828 | CIDEA    | 2.573016458  | 0.030932146 |
| ENSCAFG00000018832 | TUBB6    | 1.60572272   | 0.00312257  |
| ENSCAFG00000018844 | ADAMTS12 | 1.1161611    | 0.006452716 |
| ENSCAFG00000018864 | GPC3     | 3.637905291  | 0.000488242 |
| ENSCAFG00000018939 |          | 1.21419424   | 0.000136923 |
| ENSCAFG00000018959 | EMP2     | 1.219309968  | 0.028751576 |
| ENSCAFG00000019014 | SEMA6B   | 2.027154129  | 0.000466259 |
| ENSCAFG00000019053 | CYB5RL   | -1.165933182 | 0.013563887 |
| ENSCAFG00000019071 | TRARG1   | 3.411899961  | 0.01155865  |
| ENSCAFG00000019082 | RBFOX1   | 1.018925255  | 7.01E-06    |
| ENSCAFG00000019116 | MAMLD1   | 1.658100211  | 0.000483916 |
| ENSCAFG00000019130 | RFLNB    | -1.745208412 | 0.000258429 |
| ENSCAFG00000019166 | ROGDI    | -1.802804668 | 0.048991131 |
| ENSCAFG00000019177 | SLC1A7   | 1.515812379  | 5.95E-06    |
| ENSCAFG00000019183 | PODN     | 1.100420401  | 0.000952119 |
| ENSCAFG00000019194 | SLC43A2  | 1.785886391  | 1.78E-05    |
| ENSCAFG00000019230 | ATP2B3   | 1.951482529  | 0.006389196 |
| ENSCAFG00000019237 | ADCY9    | -1.114361916 | 0.000324646 |
| ENSCAFG00000019270 | PLXNB3   | 1.122704763  | 0.000294855 |
| ENSCAFG00000019294 | ACAP3    | 1.378755999  | 0.00145157  |
| ENSCAFG00000019343 | FLYWCH1  | 1.076444656  | 0.014196013 |
| ENSCAFG00000019346 | SRRM2    | 1.152116405  | 0.002210319 |



|                    |              |              |             |
|--------------------|--------------|--------------|-------------|
| ENSCAFG00000019377 | CAMKK1       | 1.061417546  | 0.00604793  |
| ENSCAFG00000019445 | NRARP        | -1.371850569 | 0.00174184  |
| ENSCAFG00000019451 | TKTL1        | -2.365177908 | 0.000392294 |
| ENSCAFG00000019473 | PRDM16       | 1.56258782   | 0.023418886 |
| ENSCAFG00000019489 | TP73         | 2.905575709  | 0.000750335 |
| ENSCAFG00000019536 | ATP5F1D      | -1.030452183 | 0.020752689 |
| ENSCAFG00000019567 | RNF207       | -1.573054    | 0.018750376 |
| ENSCAFG00000019590 | UBL4A        | -1.14127969  | 0.02466721  |
| ENSCAFG00000019601 | SOX8         | 1.297888547  | 0.008758612 |
| ENSCAFG00000019635 |              | -1.315155354 | 0.00389216  |
| ENSCAFG00000019662 | PIGQ         | 1.321305634  | 0.000163073 |
| ENSCAFG00000019694 | GP5M1        | 1.480397685  | 0.010779818 |
| ENSCAFG00000019714 | SLC2A5       | 3.662276198  | 0.003281143 |
| ENSCAFG00000019738 | ATP5PB       | -1.134909319 | 0.023993713 |
| ENSCAFG00000019760 | MED22        | -1.003795679 | 0.002604276 |
| ENSCAFG00000019812 | GSTM4        | -1.041475283 | 0.003997931 |
| ENSCAFG00000019829 | ATXN7L2      | 1.466317888  | 1.11E-05    |
| ENSCAFG00000019834 | CPNE7        | 3.194826921  | 0.000221826 |
| ENSCAFG00000019852 | CBFA2T3      | 1.389650257  | 0.017585781 |
| ENSCAFG00000019921 | COX4I1       | -1.040576399 | 0.047115615 |
| ENSCAFG00000019928 | GSE1         | 1.019355506  | 0.011056873 |
| ENSCAFG00000019950 | HMCN2        | 1.4102366    | 0.014530595 |
| ENSCAFG00000020004 | VCAM1        | 1.173869177  | 0.009799168 |
| ENSCAFG00000020024 | DYNLRB2      | 2.549179548  | 0.001473666 |
| ENSCAFG00000020030 | KYAT1        | -1.113593444 | 0.02654489  |
| ENSCAFG00000020035 | NUDT7        | 1.24456432   | 0.004605289 |
| ENSCAFG00000020094 | FAM102A      | 2.175401974  | 1.36E-07    |
| ENSCAFG00000020100 |              | -1.298089557 | 0.01057904  |
| ENSCAFG00000020106 | ENG          | -1.282085721 | 0.000110507 |
| ENSCAFG00000020110 | F3           | 1.360860182  | 0.021465896 |
| ENSCAFG00000020144 | FUK          | 1.363530793  | 5.80E-08    |
| ENSCAFG00000020153 | MTSS1L       | 1.737018296  | 5.57E-06    |
| ENSCAFG00000020166 | ANGPTL2      | 2.573477699  | 7.16E-11    |
| ENSCAFG00000020220 |              | 2.710240535  | 0.021401542 |
| ENSCAFG00000020254 | NFAT5        | 1.457593548  | 0.001338247 |
| ENSCAFG00000020270 | COL24A1      | 2.567528107  | 0.027077318 |
| ENSCAFG00000020294 | HAS3         | -1.40053182  | 0.000946821 |
| ENSCAFG00000020333 | PSMB10       | -1.066807478 | 0.024860678 |
| ENSCAFG00000020340 | ADGRL4       | -1.389071283 | 9.14E-05    |
| ENSCAFG00000020345 | PTGFR        | -1.882157801 | 0.009963985 |
| ENSCAFG00000020369 | SLC9A5       | 1.227998639  | 0.007339295 |
| ENSCAFG00000020413 | CDH5         | -1.237957677 | 0.000359471 |
| ENSCAFG00000020417 | CTH          | -1.149510162 | 0.010873072 |
| ENSCAFG00000020524 | MIR1-2       | 1.522709537  | 5.43E-06    |
| ENSCAFG00000020633 | cfa-mir-133a | 1.929976766  | 3.51E-06    |
| ENSCAFG00000020713 | RF00279      | -2.083900776 | 0.000291767 |
| ENSCAFG00000022709 |              | -1.487261545 | 0.008641199 |
| ENSCAFG00000022711 |              | -1.373442881 | 0.011590714 |
| ENSCAFG00000022723 | MT-CO1       | -1.281616041 | 0.012645365 |
| ENSCAFG00000022728 | MT-ATP8      | -1.303498003 | 0.000938689 |

|                    |          |              |             |
|--------------------|----------|--------------|-------------|
| ENSCAFG00000022730 | COX3     | -1.041425507 | 0.036124624 |
| ENSCAFG00000022741 |          | -1.298356819 | 0.028690756 |
| ENSCAFG00000022843 | MIR675   | 2.622702983  | 0.006007069 |
| ENSCAFG00000022889 | MIR24-2  | 1.557398431  | 0.006861982 |
| ENSCAFG00000023027 | ARRDC5   | 1.150509869  | 0.034139101 |
| ENSCAFG00000023152 |          | 1.153009884  | 0.011834166 |
| ENSCAFG00000023394 |          | -1.002758554 | 0.046946751 |
| ENSCAFG00000023408 |          | -1.141723145 | 0.00714097  |
| ENSCAFG00000023538 | SRRT     | 1.035214781  | 0.000559737 |
| ENSCAFG00000023540 |          | 1.325121237  | 0.04352233  |
| ENSCAFG00000023689 | LIPJ     | -1.303260733 | 0.014301072 |
| ENSCAFG00000023755 | GMPPB    | 1.017011418  | 0.003720277 |
| ENSCAFG00000023759 | MT2A     | 2.547857727  | 0.014089363 |
| ENSCAFG00000023832 |          | -1.323891006 | 0.000151578 |
| ENSCAFG00000023837 | PTGFRN   | 1.424024688  | 0.002561536 |
| ENSCAFG00000023881 | ZNF227   | 1.439084463  | 0.000355734 |
| ENSCAFG00000023904 | CHRN4    | 2.994776744  | 0.000373308 |
| ENSCAFG00000024028 |          | 2.025626677  | 0.000349439 |
| ENSCAFG00000024187 | DPEP2    | -2.179177004 | 1.09E-08    |
| ENSCAFG00000024406 |          | 1.644415907  | 0.004026007 |
| ENSCAFG00000024433 | COLCA2   | 1.691023787  | 0.038485686 |
| ENSCAFG00000024609 | CNTN2    | 2.872419854  | 0.001725726 |
| ENSCAFG00000024646 | ERAP2    | -1.390258295 | 0.001184727 |
| ENSCAFG00000024681 |          | 6.923324906  | 0.002140458 |
| ENSCAFG00000024731 | RP9      | -1.25200675  | 0.000100499 |
| ENSCAFG00000024802 |          | 1.13555329   | 0.0399155   |
| ENSCAFG00000024807 | CHRNA    | 6.422497873  | 0.0029329   |
| ENSCAFG00000024834 |          | 3.157742172  | 0.001492967 |
| ENSCAFG00000024981 | TMEM38B  | 1.044771122  | 0.003535476 |
| ENSCAFG00000025295 |          | 1.227862985  | 0.006313467 |
| ENSCAFG00000025390 | SLC22A17 | 2.258264891  | 0.003516952 |
| ENSCAFG00000025426 |          | 1.980026291  | 0.014334263 |
| ENSCAFG00000025524 |          | 2.074208752  | 0.006384599 |
| ENSCAFG00000025533 | ITIH4    | 1.013945047  | 0.009572697 |
| ENSCAFG00000025586 |          | 3.606892375  | 2.35E-05    |
| ENSCAFG00000025589 |          | -1.184356045 | 0.002014859 |
| ENSCAFG00000027573 |          | 2.088437342  | 0.000913359 |
| ENSCAFG00000028459 | MT3      | 6.12600805   | 1.89E-05    |
| ENSCAFG00000028490 |          | 2.134516548  | 0.008739537 |
| ENSCAFG00000028506 |          | 2.666777618  | 0.000629504 |
| ENSCAFG00000028544 |          | 6.025239852  | 0.000217346 |
| ENSCAFG00000028591 | POPDC3   | -1.179910135 | 0.009246531 |
| ENSCAFG00000028594 | RF01973  | 2.538790086  | 0.009764673 |
| ENSCAFG00000028605 | PNPLA4   | -1.226578556 | 0.016875525 |
| ENSCAFG00000028647 | BGLAP    | 2.961988926  | 0.000994914 |
| ENSCAFG00000028653 |          | 3.005018503  | 0.002895369 |
| ENSCAFG00000028669 | FAM171B  | 1.876683757  | 0.014915819 |
| ENSCAFG00000028708 | SCD5     | -2.404269087 | 1.34E-09    |
| ENSCAFG00000028754 | PLPP3    | 1.013266994  | 0.015129931 |
| ENSCAFG00000028761 |          | 1.789993968  | 0.001797349 |

|                    |         |              |             |
|--------------------|---------|--------------|-------------|
| ENSCAFG00000028779 | MRPS6   | -1.22526602  | 0.01180128  |
| ENSCAFG00000028785 |         | -1.434138605 | 0.000604656 |
| ENSCAFG00000028801 |         | 1.028688874  | 0.001733252 |
| ENSCAFG00000028802 | MRPL34  | -1.420822833 | 0.004781607 |
| ENSCAFG00000028810 | GPIHBP1 | -1.280947073 | 0.027348992 |
| ENSCAFG00000028817 | CFD     | 1.662655693  | 1.54E-05    |
| ENSCAFG00000028837 | UQCR10  | -1.046547221 | 0.00459733  |
| ENSCAFG00000028858 | FHL5    | -1.041337881 | 0.019632104 |
| ENSCAFG00000028875 | CD248   | 1.407514548  | 0.008157337 |
| ENSCAFG00000028947 | ELN     | 2.210170418  | 0.000433772 |
| ENSCAFG00000028958 | TCEAL7  | 2.531827754  | 0.001014956 |
| ENSCAFG00000028982 |         | 1.813534269  | 0.021815695 |
| ENSCAFG00000028991 |         | -1.090367596 | 0.001494158 |
| ENSCAFG00000029004 |         | -1.599186648 | 0.002268363 |
| ENSCAFG00000029014 |         | 1.707414546  | 0.007301902 |
| ENSCAFG00000029022 | COL6A2  | 1.061496819  | 0.034343103 |
| ENSCAFG00000029045 | ACSL3   | 1.046036849  | 0.008872524 |
| ENSCAFG00000029101 | NOG     | 1.883194247  | 0.004081021 |
| ENSCAFG00000029129 | RF01871 | 1.763822646  | 0.000836747 |
| ENSCAFG00000029157 | NOVA1   | 1.646552438  | 0.024733568 |
| ENSCAFG00000029245 | ABHD14A | -1.117442156 | 0.008014348 |
| ENSCAFG00000029278 | SOX18   | -1.236479407 | 0.00022722  |
| ENSCAFG00000029304 | RF01972 | 2.581346343  | 0.006723539 |
| ENSCAFG00000029321 | WNT5A   | 1.351539574  | 0.004451194 |
| ENSCAFG00000029359 | KCNK5   | 2.439089957  | 0.003274368 |
| ENSCAFG00000029367 | COL28A1 | 1.848543155  | 0.00670202  |
| ENSCAFG00000029381 |         | 1.056372236  | 0.039574702 |
| ENSCAFG00000029425 | SRPK3   | 1.930700602  | 0.000785187 |
| ENSCAFG00000029427 |         | 1.124815545  | 0.028043853 |
| ENSCAFG00000029464 | CDC34   | -1.192289701 | 0.011546037 |
| ENSCAFG00000029474 | GADD45A | 1.924300999  | 3.16E-08    |
| ENSCAFG00000029558 | BMF     | 1.303865998  | 0.00263344  |
| ENSCAFG00000029587 |         | -1.426038611 | 0.039437274 |
| ENSCAFG00000029672 |         | -1.292002834 | 0.010020094 |
| ENSCAFG00000029674 |         | 1.110569044  | 0.000527864 |
| ENSCAFG00000029771 | ETFRF1  | -1.066628869 | 0.047038849 |
| ENSCAFG00000029798 | RF01955 | 2.088740867  | 0.000595944 |
| ENSCAFG00000029853 | CDKN1A  | 2.880122608  | 3.50E-05    |
| ENSCAFG00000029856 | RF01881 | 10.4738747   | 0.020926299 |
| ENSCAFG00000029882 | MISP    | 2.717892814  | 0.010353504 |
| ENSCAFG00000029937 | EFHD1   | 2.224916162  | 2.69E-05    |
| ENSCAFG00000029969 | RGS4    | -1.026160719 | 0.0297151   |
| ENSCAFG00000030025 | FGL2    | 1.646365038  | 0.006467272 |
| ENSCAFG00000030039 |         | -1.129461395 | 0.015693099 |
| ENSCAFG00000030057 | ZNF234  | 1.10813289   | 0.001150161 |
| ENSCAFG00000030058 | ECI1    | -1.030053819 | 0.024263669 |
| ENSCAFG00000030080 |         | 1.148181614  | 0.00489728  |
| ENSCAFG00000030091 |         | -1.275913261 | 0.010161037 |
| ENSCAFG00000030120 | CSPG4   | 2.24944815   | 0.032928671 |
| ENSCAFG00000030143 |         | -1.066056007 | 0.012778784 |

|                    |         |              |             |
|--------------------|---------|--------------|-------------|
| ENSCAFG00000030159 |         | -1.227600944 | 0.043413381 |
| ENSCAFG00000030198 |         | 2.498094202  | 0.001063778 |
| ENSCAFG00000030307 |         | 1.658890403  | 0.004582828 |
| ENSCAFG00000030320 | SHISA2  | 2.197868448  | 6.20E-06    |
| ENSCAFG00000030348 |         | -1.296446626 | 0.004574621 |
| ENSCAFG00000030445 |         | 2.000548028  | 0.000527698 |
| ENSCAFG00000030466 |         | -1.240887145 | 0.00556606  |
| ENSCAFG00000030529 |         | 1.46912927   | 0.002699317 |
| ENSCAFG00000030538 |         | -1.075435722 | 0.013442398 |
| ENSCAFG00000030588 |         | 2.723270352  | 0.001089448 |
| ENSCAFG00000030617 | NXP3    | -2.561698096 | 0.025531412 |
| ENSCAFG00000030662 |         | 3.778100823  | 1.11E-05    |
| ENSCAFG00000030682 |         | 3.481809075  | 4.97E-05    |
| ENSCAFG00000030715 |         | 1.765640989  | 0.000114114 |
| ENSCAFG00000030745 | SRSF12  | 1.108425678  | 0.01475907  |
| ENSCAFG00000030769 | SLC35F6 | 1.193279372  | 0.005878154 |
| ENSCAFG00000030770 |         | 1.930142258  | 0.015083311 |
| ENSCAFG00000030835 |         | -1.451368233 | 0.017367549 |
| ENSCAFG00000030838 | PTGES   | 2.013018561  | 0.016653489 |
| ENSCAFG00000030871 |         | 1.05857212   | 0.007375821 |
| ENSCAFG00000030875 |         | 1.608460075  | 0.048815124 |
| ENSCAFG00000030921 | ATP5MD  | -1.059311162 | 0.033068031 |
| ENSCAFG00000030932 | TMEM218 | 1.366326812  | 0.002125813 |
| ENSCAFG00000030939 |         | 1.528769482  | 0.002116392 |
| ENSCAFG00000030990 | INSYN1  | -1.061935662 | 0.022583191 |
| ENSCAFG00000030999 |         | 1.52685938   | 0.005710941 |
| ENSCAFG00000031042 | PLAGL2  | 1.246297526  | 0.013784998 |
| ENSCAFG00000031124 | APH1B   | 1.00076677   | 0.026136988 |
| ENSCAFG00000031158 | EPDR1   | -1.118055986 | 0.049551727 |
| ENSCAFG00000031234 | KY      | 1.815304444  | 6.53E-06    |
| ENSCAFG00000031239 |         | 3.005095626  | 0.000570039 |
| ENSCAFG00000031288 | RF01956 | 1.827918233  | 0.002792908 |
| ENSCAFG00000031322 | PDXK    | 1.305125294  | 0.001498442 |
| ENSCAFG00000031328 | RF01956 | 2.367910209  | 0.002575286 |
| ENSCAFG00000031376 | UBXN2A  | -1.177242351 | 0.002420848 |
| ENSCAFG00000031437 |         | 1.919612134  | 0.010516873 |
| ENSCAFG00000031454 |         | 1.094919979  | 0.027078429 |
| ENSCAFG00000031481 |         | -3.618944662 | 0.001123586 |
| ENSCAFG00000031536 | LDLRAD4 | -1.135538343 | 0.036520225 |
| ENSCAFG00000031544 |         | 1.157752637  | 0.046680847 |
| ENSCAFG00000031557 |         | 1.502635768  | 0.000783021 |
| ENSCAFG00000031576 | PARD6A  | -1.317161772 | 0.015439296 |
| ENSCAFG00000031628 |         | -1.048957844 | 0.011287982 |
| ENSCAFG00000031672 | CLBA1   | 1.385946391  | 0.009493958 |
| ENSCAFG00000031678 | POLR2M  | -1.078491234 | 0.002957049 |
| ENSCAFG00000031706 |         | -1.28177841  | 0.000149951 |
| ENSCAFG00000031711 |         | -1.031745791 | 0.007657675 |
| ENSCAFG00000031732 |         | 1.208240735  | 0.023597593 |
| ENSCAFG00000031759 | NAPRT   | 1.137586726  | 0.000246641 |
| ENSCAFG00000031761 | NDUFAF4 | -1.157022869 | 0.00342678  |

|                    |          |              |             |
|--------------------|----------|--------------|-------------|
| ENSCAFG00000031767 | TUBA3D   | -1.183800581 | 0.008601769 |
| ENSCAFG00000031894 | TENT5A   | 1.583488798  | 0.007734554 |
| ENSCAFG00000031936 | NRBF2    | -1.185641603 | 0.003078252 |
| ENSCAFG00000031973 |          | 1.332445171  | 0.006817586 |
| ENSCAFG00000032024 | GPR162   | -2.463949496 | 6.21E-05    |
| ENSCAFG00000032043 |          | -2.20433237  | 0.001678703 |
| ENSCAFG00000032112 | TAL2     | 2.94392871   | 0.004917625 |
| ENSCAFG00000032118 |          | -1.138895773 | 0.018276892 |
| ENSCAFG00000032120 | C1QTNF6  | 2.399081358  | 0.000135655 |
| ENSCAFG00000032127 | CHST11   | 2.345499067  | 6.03E-05    |
| ENSCAFG00000032147 | BAALC    | -1.13266298  | 0.002420569 |
| ENSCAFG00000032192 | RF01957  | 1.877600911  | 0.001393978 |
| ENSCAFG00000032227 | OLFM1    | 2.018599342  | 0.001343614 |
| ENSCAFG00000032235 |          | 1.063675433  | 0.022272439 |
| ENSCAFG00000032261 | SPA17    | 1.15161096   | 0.006804599 |
| ENSCAFG00000032271 | CLEC2L   | -2.673159068 | 0.010646838 |
| ENSCAFG00000032273 | FXVD6    | -1.02034559  | 0.004449233 |
| ENSCAFG00000032286 |          | 3.21861502   | 0.000368607 |
| ENSCAFG00000032289 | BMP6     | -1.032987354 | 0.000296286 |
| ENSCAFG00000032331 |          | 3.759854124  | 0.00023202  |
| ENSCAFG00000032339 | CYP2A13  | 3.901819907  | 0.003396964 |
| ENSCAFG00000032342 | PDGFD    | 1.400444854  | 0.020132685 |
| ENSCAFG00000032355 |          | -1.009631633 | 0.003177971 |
| ENSCAFG00000032379 | PEG10    | 1.896958064  | 0.015761427 |
| ENSCAFG00000032391 | FAM83H   | 2.867942717  | 5.20E-05    |
| ENSCAFG00000032403 | MAP3K7CL | 2.373587607  | 0.000262929 |
| ENSCAFG00000032412 | FLI1     | -1.077108936 | 0.008566654 |
| ENSCAFG00000032457 | MAFA     | 1.080659691  | 0.006458248 |
| ENSCAFG00000032459 |          | -1.283411154 | 0.004252818 |
| ENSCAFG00000032489 | SHISA7   | 1.212888972  | 0.03862263  |
| ENSCAFG00000032569 | RBP1     | -1.768499041 | 0.02438051  |
| ENSCAFG00000032571 |          | 3.739198549  | 1.03E-05    |
| ENSCAFG00000032575 |          | -1.078791495 | 0.030479117 |
| ENSCAFG00000032578 |          | 6.30787986   | 0.000471961 |
| ENSCAFG00000032608 | LURAP1L  | -1.145101363 | 0.004169693 |
| ENSCAFG00000032656 |          | 1.339257263  | 0.001295681 |
| ENSCAFG00000032684 |          | 3.042024837  | 0.000473205 |
| ENSCAFG00000032694 | TFB2M    | -1.275430636 | 0.000734926 |
| ENSCAFG00000032756 | FAM198B  | -1.064271179 | 0.007440683 |
| ENSCAFG00000032816 |          | 1.215080564  | 0.01315781  |
| ENSCAFG00000032896 |          | 2.943493356  | 2.03E-05    |
| ENSCAFG00000032930 |          | 1.677166808  | 0.00614993  |
| ENSCAFG00000033011 |          | -2.743409349 | 0.015945439 |
| ENSCAFG00000033086 |          | 2.931779724  | 0.014295762 |
| ENSCAFG00000033248 |          | -3.429665114 | 6.00E-05    |
| ENSCAFG00000033312 |          | -1.936984845 | 0.000720157 |
| ENSCAFG00000033759 |          | -4.107143429 | 6.77E-05    |
| ENSCAFG00000034559 |          | -1.025799586 | 0.01361523  |
| ENSCAFG00000034578 |          | -1.802512961 | 0.027193228 |
| ENSCAFG00000034881 |          | 2.008075137  | 0.003050977 |

|                    |              |             |
|--------------------|--------------|-------------|
| ENSCAFG00000034998 | -1.43732112  | 0.00348454  |
| ENSCAFG00000035036 | -1.682876794 | 0.019500818 |
| ENSCAFG00000035090 | -1.006349504 | 0.008010664 |
| ENSCAFG00000035199 | 2.07300263   | 0.010484605 |
| ENSCAFG00000035325 | -2.093413811 | 0.000590218 |
| ENSCAFG00000035481 | -1.381384111 | 0.034922837 |
| ENSCAFG00000036055 | 1.535277971  | 0.005403628 |
| ENSCAFG00000036094 | -1.043466658 | 0.01636768  |
| ENSCAFG00000037282 | 3.739182512  | 0.00035113  |
| ENSCAFG00000037835 | -1.948492209 | 0.015096312 |
| ENSCAFG00000037891 | 1.136005698  | 0.000444791 |
| ENSCAFG00000038320 | -2.280863328 | 0.000535149 |
| ENSCAFG00000038408 | 1.863437754  | 0.002241063 |
| ENSCAFG00000038525 | -1.380440645 | 6.19E-08    |
| ENSCAFG00000038692 | -1.277799042 | 0.01923605  |
| ENSCAFG00000038722 | 3.048776788  | 0.038657025 |
| ENSCAFG00000039280 | 1.030014058  | 0.036862642 |
| ENSCAFG00000039524 | 5.979630986  | 0.040417525 |
| ENSCAFG00000039836 | 2.327484717  | 0.019148216 |
| ENSCAFG00000039851 | 1.897559504  | 0.025742449 |
| ENSCAFG00000040231 | -1.616911241 | 0.000127063 |
| ENSCAFG00000040365 | 2.896989593  | 0.025237029 |
| ENSCAFG00000040425 | -1.055143908 | 0.00985659  |
| ENSCAFG00000040440 | -1.017597659 | 0.02575049  |
| ENSCAFG00000040534 | 1.79037991   | 0.000318101 |
| ENSCAFG00000040611 | 2.06534937   | 0.04227302  |

Table S4: List of genes (as ensemble ID) presenting a Rescued expression profile in the Biceps femoris or in the Vastus lateralis of the dogs showing therapeutic benefits.

| Rescued Biceps    | Rescued Vastus     |  | Rescued Common     | Gene name |
|-------------------|--------------------|--|--------------------|-----------|
| ENSCAFG0000000097 | ENSCAFG0000000097  |  | ENSCAFG0000000097  | ERBB3     |
| ENSCAFG0000000110 | ENSCAFG0000000124  |  | ENSCAFG0000000124  | TIMELESS  |
| ENSCAFG0000000124 | ENSCAFG0000000420  |  | ENSCAFG0000000611  | MEGF10    |
| ENSCAFG0000000282 | ENSCAFG0000000426  |  | ENSCAFG00000001287 | TCP11     |
| ENSCAFG0000000288 | ENSCAFG0000000479  |  | ENSCAFG00000001556 | KCNK17    |
| ENSCAFG0000000372 | ENSCAFG0000000493  |  | ENSCAFG00000001596 | FOXP4     |
| ENSCAFG0000000413 | ENSCAFG0000000522  |  | ENSCAFG00000001649 | GCNT1     |
| ENSCAFG0000000448 | ENSCAFG0000000535  |  | ENSCAFG00000001793 | BTBD11    |
| ENSCAFG0000000523 | ENSCAFG0000000568  |  | ENSCAFG00000001909 | KIF24     |
| ENSCAFG0000000561 | ENSCAFG0000000569  |  | ENSCAFG00000002319 | KIAA1211L |
| ENSCAFG0000000611 | ENSCAFG0000000611  |  | ENSCAFG00000002830 | RIMS3     |
| ENSCAFG0000000722 | ENSCAFG0000000626  |  | ENSCAFG00000003096 | PM20D2    |
| ENSCAFG0000000733 | ENSCAFG0000000640  |  | ENSCAFG00000003775 | OSR1      |
| ENSCAFG0000000799 | ENSCAFG0000000641  |  | ENSCAFG00000003804 |           |
| ENSCAFG0000000886 | ENSCAFG0000000654  |  | ENSCAFG00000003960 | TRAF3IP2  |
| ENSCAFG0000000903 | ENSCAFG0000000671  |  | ENSCAFG00000004127 | SESN3     |
| ENSCAFG0000000934 | ENSCAFG0000000798  |  | ENSCAFG00000004297 | CCDC8     |
| ENSCAFG0000001007 | ENSCAFG0000000884  |  | ENSCAFG00000004331 |           |
| ENSCAFG0000001067 | ENSCAFG00000001126 |  | ENSCAFG00000004481 | SLC6A6    |
| ENSCAFG0000001085 | ENSCAFG00000001250 |  | ENSCAFG00000004636 | BCAM      |
| ENSCAFG0000001287 | ENSCAFG00000001287 |  | ENSCAFG00000004731 | TENM4     |
| ENSCAFG0000001346 | ENSCAFG00000001299 |  | ENSCAFG00000004746 | XRCC1     |
| ENSCAFG0000001450 | ENSCAFG00000001317 |  | ENSCAFG00000004769 | OPTN      |
| ENSCAFG0000001556 | ENSCAFG00000001324 |  | ENSCAFG00000004820 | ITGA9     |
| ENSCAFG0000001581 | ENSCAFG00000001453 |  | ENSCAFG00000004958 | ATP1A3    |
| ENSCAFG0000001596 | ENSCAFG00000001515 |  | ENSCAFG00000005294 | TK1       |
| ENSCAFG0000001649 | ENSCAFG00000001556 |  | ENSCAFG00000005348 | EHD3      |
| ENSCAFG0000001793 | ENSCAFG00000001596 |  | ENSCAFG00000005433 | ABCC4     |
| ENSCAFG0000001875 | ENSCAFG00000001649 |  | ENSCAFG00000005564 | UCP2      |
| ENSCAFG0000001909 | ENSCAFG00000001672 |  | ENSCAFG00000006006 | FASN      |
| ENSCAFG0000001923 | ENSCAFG00000001705 |  | ENSCAFG00000006053 |           |
| ENSCAFG0000002313 | ENSCAFG00000001793 |  | ENSCAFG00000006800 | FZD10     |
| ENSCAFG0000002319 | ENSCAFG00000001852 |  | ENSCAFG00000006877 | FAM110A   |
| ENSCAFG0000002517 | ENSCAFG00000001854 |  | ENSCAFG00000007562 | AMPD3     |
| ENSCAFG0000002549 | ENSCAFG00000001909 |  | ENSCAFG00000007945 | PROCR     |
| ENSCAFG0000002656 | ENSCAFG00000001966 |  | ENSCAFG00000008062 |           |
| ENSCAFG0000002719 | ENSCAFG00000002040 |  | ENSCAFG00000008319 | CHODL     |
| ENSCAFG0000002748 | ENSCAFG00000002042 |  | ENSCAFG00000008707 | CKMT2     |
| ENSCAFG0000002796 | ENSCAFG00000002053 |  | ENSCAFG00000008786 | NNAT      |
| ENSCAFG0000002830 | ENSCAFG00000002069 |  | ENSCAFG00000008977 | LRP4      |
| ENSCAFG0000002854 | ENSCAFG00000002079 |  | ENSCAFG00000009066 | MYOD1     |
| ENSCAFG0000002917 | ENSCAFG00000002098 |  | ENSCAFG00000009333 | CES1      |
| ENSCAFG0000002928 | ENSCAFG00000002116 |  | ENSCAFG00000009337 | TUBB2A    |
| ENSCAFG0000003096 | ENSCAFG00000002230 |  | ENSCAFG00000009673 |           |
| ENSCAFG0000003276 | ENSCAFG00000002319 |  | ENSCAFG00000009777 | NAV2      |
| ENSCAFG0000003327 | ENSCAFG00000002365 |  | ENSCAFG00000009978 | ETS2      |
| ENSCAFG0000003388 | ENSCAFG00000002420 |  | ENSCAFG00000010090 | IGF2      |

|                    |                    |                     |          |
|--------------------|--------------------|---------------------|----------|
| ENSCAFG00000003426 | ENSCAFG00000002432 | ENSCAFG000000010121 | CD81     |
| ENSCAFG00000003602 | ENSCAFG00000002576 | ENSCAFG000000010175 | CDH22    |
| ENSCAFG00000003663 | ENSCAFG00000002645 | ENSCAFG000000010288 | MYBPH    |
| ENSCAFG00000003676 | ENSCAFG00000002830 | ENSCAFG000000010309 | MYOG     |
| ENSCAFG00000003720 | ENSCAFG00000002927 | ENSCAFG000000010423 | COL4A4   |
| ENSCAFG00000003775 | ENSCAFG00000002948 | ENSCAFG000000010588 | MARCKSL1 |
| ENSCAFG00000003804 | ENSCAFG00000002974 | ENSCAFG000000010654 | AGPAT3   |
| ENSCAFG00000003824 | ENSCAFG00000003096 | ENSCAFG000000010936 | NPNT     |
| ENSCAFG00000003960 | ENSCAFG00000003105 | ENSCAFG000000011069 | GJA5     |
| ENSCAFG00000004034 | ENSCAFG00000003116 | ENSCAFG000000011283 | CHRND    |
| ENSCAFG00000004127 | ENSCAFG00000003268 | ENSCAFG000000011378 | ANKRD34A |
| ENSCAFG00000004129 | ENSCAFG00000003402 | ENSCAFG000000011823 | MN1      |
| ENSCAFG00000004176 | ENSCAFG00000003404 | ENSCAFG000000012095 | AHDC1    |
| ENSCAFG00000004279 | ENSCAFG00000003530 | ENSCAFG000000012376 | VASH2    |
| ENSCAFG00000004297 | ENSCAFG00000003579 | ENSCAFG000000012525 | MUC13    |
| ENSCAFG00000004331 | ENSCAFG00000003605 | ENSCAFG000000012742 | MTFP1    |
| ENSCAFG00000004481 | ENSCAFG00000003639 | ENSCAFG000000012803 | RIN1     |
| ENSCAFG00000004510 | ENSCAFG00000003775 | ENSCAFG000000012824 | SCN4B    |
| ENSCAFG00000004529 | ENSCAFG00000003797 | ENSCAFG000000012904 | CDK1     |
| ENSCAFG00000004555 | ENSCAFG00000003804 | ENSCAFG000000012925 | PHKA2    |
| ENSCAFG00000004589 | ENSCAFG00000003854 | ENSCAFG000000013020 | STMN3    |
| ENSCAFG00000004636 | ENSCAFG00000003960 | ENSCAFG000000013283 | CHRNA1   |
| ENSCAFG00000004731 | ENSCAFG00000004054 | ENSCAFG000000013423 | FUOM     |
| ENSCAFG00000004746 | ENSCAFG00000004124 | ENSCAFG000000013483 | TMEM120A |
| ENSCAFG00000004769 | ENSCAFG00000004127 | ENSCAFG000000013521 | POLA1    |
| ENSCAFG00000004820 | ENSCAFG00000004137 | ENSCAFG000000014054 | ACHE     |
| ENSCAFG00000004856 | ENSCAFG00000004232 | ENSCAFG000000014124 | CHCHD10  |
| ENSCAFG00000004931 | ENSCAFG00000004274 | ENSCAFG000000014308 | ALAS2    |
| ENSCAFG00000004958 | ENSCAFG00000004297 | ENSCAFG000000014310 | APEX2    |
| ENSCAFG00000005081 | ENSCAFG00000004331 | ENSCAFG000000014410 | CHST3    |
| ENSCAFG00000005122 | ENSCAFG00000004392 | ENSCAFG000000014448 | ZNF804A  |
| ENSCAFG00000005179 | ENSCAFG00000004402 | ENSCAFG000000014474 | IGFBP5   |
| ENSCAFG00000005276 | ENSCAFG00000004416 | ENSCAFG000000014551 | GAL3ST4  |
| ENSCAFG00000005294 | ENSCAFG00000004481 | ENSCAFG000000014978 |          |
| ENSCAFG00000005301 | ENSCAFG00000004632 | ENSCAFG000000015078 | FAM184B  |
| ENSCAFG00000005309 | ENSCAFG00000004636 | ENSCAFG000000015209 | TUBA4A   |
| ENSCAFG00000005348 | ENSCAFG00000004714 | ENSCAFG000000015217 |          |
| ENSCAFG00000005433 | ENSCAFG00000004731 | ENSCAFG000000015539 | PAX7     |
| ENSCAFG00000005468 | ENSCAFG00000004746 | ENSCAFG000000015788 | B4GALNT3 |
| ENSCAFG00000005564 | ENSCAFG00000004769 | ENSCAFG000000016072 |          |
| ENSCAFG00000005595 | ENSCAFG00000004801 | ENSCAFG000000016769 | NES      |
| ENSCAFG00000005621 | ENSCAFG00000004820 | ENSCAFG000000017615 | ST8SIA5  |
| ENSCAFG00000005768 | ENSCAFG00000004956 | ENSCAFG000000017705 | ARMCX2   |
| ENSCAFG00000005843 | ENSCAFG00000004958 | ENSCAFG000000017883 | NRK      |
| ENSCAFG00000005918 | ENSCAFG00000004991 | ENSCAFG000000018175 | CAPN6    |
| ENSCAFG00000005965 | ENSCAFG00000005051 | ENSCAFG000000018277 |          |
| ENSCAFG00000006006 | ENSCAFG00000005183 | ENSCAFG000000018360 |          |
| ENSCAFG00000006019 | ENSCAFG00000005255 | ENSCAFG000000018457 | NT5M     |
| ENSCAFG00000006053 | ENSCAFG00000005294 | ENSCAFG000000018643 | SLC25A23 |
| ENSCAFG00000006073 | ENSCAFG00000005348 | ENSCAFG000000018702 | EFCAB7   |



|                    |                    |                    |          |
|--------------------|--------------------|--------------------|----------|
| ENSCAFG00000006134 | ENSCAFG00000005365 | ENSCAFG00000018864 | GPC3     |
| ENSCAFG00000006164 | ENSCAFG00000005411 | ENSCAFG00000019014 | SEMA6B   |
| ENSCAFG00000006175 | ENSCAFG00000005433 | ENSCAFG00000019230 | ATP2B3   |
| ENSCAFG00000006234 | ENSCAFG00000005564 | ENSCAFG00000019489 | TP73     |
| ENSCAFG00000006373 | ENSCAFG00000005693 | ENSCAFG00000019601 | SOX8     |
| ENSCAFG00000006381 | ENSCAFG00000005723 | ENSCAFG00000020153 | MTSS1L   |
| ENSCAFG00000006424 | ENSCAFG00000005767 | ENSCAFG00000020166 | ANGPTL2  |
| ENSCAFG00000006474 | ENSCAFG00000005846 | ENSCAFG00000020345 | PTGFR    |
| ENSCAFG00000006513 | ENSCAFG00000005853 | ENSCAFG00000020713 | RF00279  |
| ENSCAFG00000006576 | ENSCAFG00000005960 | ENSCAFG00000022843 | MIR675   |
| ENSCAFG00000006596 | ENSCAFG00000005963 | ENSCAFG00000023904 | CHRNB4   |
| ENSCAFG00000006723 | ENSCAFG00000006006 | ENSCAFG00000024609 | CNTN2    |
| ENSCAFG00000006800 | ENSCAFG00000006022 | ENSCAFG00000025390 | SLC22A17 |
| ENSCAFG00000006877 | ENSCAFG00000006053 | ENSCAFG00000028459 | MT3      |
| ENSCAFG00000007001 | ENSCAFG00000006091 | ENSCAFG00000028490 |          |
| ENSCAFG00000007047 | ENSCAFG00000006100 | ENSCAFG00000028594 | RF01973  |
| ENSCAFG00000007079 | ENSCAFG00000006215 | ENSCAFG00000028647 | BGLAP    |
| ENSCAFG00000007111 | ENSCAFG00000006250 | ENSCAFG00000028653 |          |
| ENSCAFG00000007149 | ENSCAFG00000006264 | ENSCAFG00000028761 |          |
| ENSCAFG00000007338 | ENSCAFG00000006334 | ENSCAFG00000028817 | CFD      |
| ENSCAFG00000007562 | ENSCAFG00000006392 | ENSCAFG00000028947 | ELN      |
| ENSCAFG00000007635 | ENSCAFG00000006417 | ENSCAFG00000028958 | TCEAL7   |
| ENSCAFG00000007847 | ENSCAFG00000006528 | ENSCAFG00000029004 |          |
| ENSCAFG00000007893 | ENSCAFG00000006559 | ENSCAFG00000029304 | RF01972  |
| ENSCAFG00000007936 | ENSCAFG00000006563 | ENSCAFG00000029856 | RF01881  |
| ENSCAFG00000007945 | ENSCAFG00000006608 | ENSCAFG00000030198 |          |
| ENSCAFG00000007985 | ENSCAFG00000006612 | ENSCAFG00000031239 |          |
| ENSCAFG00000008062 | ENSCAFG00000006701 | ENSCAFG00000031481 |          |
| ENSCAFG00000008123 | ENSCAFG00000006740 | ENSCAFG00000031936 | NRBF2    |
| ENSCAFG00000008295 | ENSCAFG00000006745 | ENSCAFG00000032024 | GPR162   |
| ENSCAFG00000008309 | ENSCAFG00000006800 | ENSCAFG00000032043 |          |
| ENSCAFG00000008319 | ENSCAFG00000006877 | ENSCAFG00000032120 | C1QTNF6  |
| ENSCAFG00000008582 | ENSCAFG00000006909 | ENSCAFG00000032235 |          |
| ENSCAFG00000008707 | ENSCAFG00000006930 | ENSCAFG00000032286 |          |
| ENSCAFG00000008755 | ENSCAFG00000007036 | ENSCAFG00000032403 | MAP3K7CL |
| ENSCAFG00000008786 | ENSCAFG00000007045 | ENSCAFG00000032684 |          |
| ENSCAFG00000008795 | ENSCAFG00000007082 | ENSCAFG00000032896 |          |
| ENSCAFG00000008847 | ENSCAFG00000007261 | ENSCAFG00000033011 |          |
| ENSCAFG00000008975 | ENSCAFG00000007394 | ENSCAFG00000033248 |          |
| ENSCAFG00000008977 | ENSCAFG00000007407 | ENSCAFG00000033312 |          |
| ENSCAFG00000008978 | ENSCAFG00000007433 | ENSCAFG00000033759 |          |
| ENSCAFG00000009005 | ENSCAFG00000007440 | ENSCAFG00000035036 |          |
| ENSCAFG00000009066 | ENSCAFG00000007562 | ENSCAFG00000035199 |          |
| ENSCAFG00000009097 | ENSCAFG00000007626 | ENSCAFG00000038320 |          |
| ENSCAFG00000009104 | ENSCAFG00000007651 |                    |          |
| ENSCAFG00000009105 | ENSCAFG00000007653 |                    |          |
| ENSCAFG00000009149 | ENSCAFG00000007750 |                    |          |
| ENSCAFG00000009187 | ENSCAFG00000007845 |                    |          |
| ENSCAFG00000009329 | ENSCAFG00000007888 |                    |          |
| ENSCAFG00000009333 | ENSCAFG00000007945 |                    |          |

|                    |                    |
|--------------------|--------------------|
| ENSCAFG00000009337 | ENSCAFG00000008062 |
| ENSCAFG00000009441 | ENSCAFG00000008164 |
| ENSCAFG00000009506 | ENSCAFG00000008319 |
| ENSCAFG00000009596 | ENSCAFG00000008343 |
| ENSCAFG00000009649 | ENSCAFG00000008403 |
| ENSCAFG00000009664 | ENSCAFG00000008477 |
| ENSCAFG00000009673 | ENSCAFG00000008503 |
| ENSCAFG00000009721 | ENSCAFG00000008566 |
| ENSCAFG00000009777 | ENSCAFG00000008597 |
| ENSCAFG00000009869 | ENSCAFG00000008707 |
| ENSCAFG00000009951 | ENSCAFG00000008728 |
| ENSCAFG00000009978 | ENSCAFG00000008741 |
| ENSCAFG00000010077 | ENSCAFG00000008761 |
| ENSCAFG00000010090 | ENSCAFG00000008786 |
| ENSCAFG00000010121 | ENSCAFG00000008837 |
| ENSCAFG00000010142 | ENSCAFG00000008942 |
| ENSCAFG00000010175 | ENSCAFG00000008977 |
| ENSCAFG00000010186 | ENSCAFG00000008979 |
| ENSCAFG00000010288 | ENSCAFG00000009026 |
| ENSCAFG00000010309 | ENSCAFG00000009066 |
| ENSCAFG00000010423 | ENSCAFG00000009076 |
| ENSCAFG00000010588 | ENSCAFG00000009271 |
| ENSCAFG00000010654 | ENSCAFG00000009282 |
| ENSCAFG00000010815 | ENSCAFG00000009333 |
| ENSCAFG00000010823 | ENSCAFG00000009337 |
| ENSCAFG00000010883 | ENSCAFG00000009362 |
| ENSCAFG00000010925 | ENSCAFG00000009395 |
| ENSCAFG00000010936 | ENSCAFG00000009401 |
| ENSCAFG00000010982 | ENSCAFG00000009414 |
| ENSCAFG00000011067 | ENSCAFG00000009546 |
| ENSCAFG00000011069 | ENSCAFG00000009552 |
| ENSCAFG00000011086 | ENSCAFG00000009570 |
| ENSCAFG00000011283 | ENSCAFG00000009641 |
| ENSCAFG00000011336 | ENSCAFG00000009653 |
| ENSCAFG00000011348 | ENSCAFG00000009663 |
| ENSCAFG00000011378 | ENSCAFG00000009673 |
| ENSCAFG00000011426 | ENSCAFG00000009680 |
| ENSCAFG00000011458 | ENSCAFG00000009717 |
| ENSCAFG00000011498 | ENSCAFG00000009735 |
| ENSCAFG00000011605 | ENSCAFG00000009744 |
| ENSCAFG00000011646 | ENSCAFG00000009765 |
| ENSCAFG00000011652 | ENSCAFG00000009777 |
| ENSCAFG00000011744 | ENSCAFG00000009820 |
| ENSCAFG00000011745 | ENSCAFG00000009881 |
| ENSCAFG00000011817 | ENSCAFG00000009961 |
| ENSCAFG00000011823 | ENSCAFG00000009978 |
| ENSCAFG00000011977 | ENSCAFG00000010090 |
| ENSCAFG00000012022 | ENSCAFG00000010121 |
| ENSCAFG00000012039 | ENSCAFG00000010175 |
| ENSCAFG00000012046 | ENSCAFG00000010264 |

|                    |                    |
|--------------------|--------------------|
| ENSCAFG00000012095 | ENSCAFG00000010274 |
| ENSCAFG00000012222 | ENSCAFG00000010285 |
| ENSCAFG00000012376 | ENSCAFG00000010288 |
| ENSCAFG00000012525 | ENSCAFG00000010298 |
| ENSCAFG00000012556 | ENSCAFG00000010304 |
| ENSCAFG00000012742 | ENSCAFG00000010309 |
| ENSCAFG00000012803 | ENSCAFG00000010423 |
| ENSCAFG00000012824 | ENSCAFG00000010526 |
| ENSCAFG00000012860 | ENSCAFG00000010588 |
| ENSCAFG00000012904 | ENSCAFG00000010654 |
| ENSCAFG00000012925 | ENSCAFG00000010656 |
| ENSCAFG00000012963 | ENSCAFG00000010700 |
| ENSCAFG00000012979 | ENSCAFG00000010752 |
| ENSCAFG00000013020 | ENSCAFG00000010758 |
| ENSCAFG00000013030 | ENSCAFG00000010790 |
| ENSCAFG00000013098 | ENSCAFG00000010825 |
| ENSCAFG00000013195 | ENSCAFG00000010891 |
| ENSCAFG00000013199 | ENSCAFG00000010923 |
| ENSCAFG00000013283 | ENSCAFG00000010936 |
| ENSCAFG00000013367 | ENSCAFG00000011069 |
| ENSCAFG00000013423 | ENSCAFG00000011283 |
| ENSCAFG00000013483 | ENSCAFG00000011378 |
| ENSCAFG00000013500 | ENSCAFG00000011534 |
| ENSCAFG00000013521 | ENSCAFG00000011584 |
| ENSCAFG00000013627 | ENSCAFG00000011772 |
| ENSCAFG00000013728 | ENSCAFG00000011823 |
| ENSCAFG00000013735 | ENSCAFG00000011986 |
| ENSCAFG00000013778 | ENSCAFG00000012065 |
| ENSCAFG00000013909 | ENSCAFG00000012068 |
| ENSCAFG00000013990 | ENSCAFG00000012085 |
| ENSCAFG00000014049 | ENSCAFG00000012095 |
| ENSCAFG00000014054 | ENSCAFG00000012098 |
| ENSCAFG00000014120 | ENSCAFG00000012182 |
| ENSCAFG00000014124 | ENSCAFG00000012290 |
| ENSCAFG00000014237 | ENSCAFG00000012376 |
| ENSCAFG00000014308 | ENSCAFG00000012385 |
| ENSCAFG00000014310 | ENSCAFG00000012449 |
| ENSCAFG00000014410 | ENSCAFG00000012473 |
| ENSCAFG00000014448 | ENSCAFG00000012525 |
| ENSCAFG00000014451 | ENSCAFG00000012619 |
| ENSCAFG00000014453 | ENSCAFG00000012661 |
| ENSCAFG00000014474 | ENSCAFG00000012709 |
| ENSCAFG00000014490 | ENSCAFG00000012716 |
| ENSCAFG00000014551 | ENSCAFG00000012742 |
| ENSCAFG00000014627 | ENSCAFG00000012803 |
| ENSCAFG00000014777 | ENSCAFG00000012824 |
| ENSCAFG00000014835 | ENSCAFG00000012904 |
| ENSCAFG00000014968 | ENSCAFG00000012918 |
| ENSCAFG00000014978 | ENSCAFG00000012925 |
| ENSCAFG00000015078 | ENSCAFG00000012952 |

|                    |                    |
|--------------------|--------------------|
| ENSCAFG00000015209 | ENSCAFG00000013011 |
| ENSCAFG00000015217 | ENSCAFG00000013020 |
| ENSCAFG00000015256 | ENSCAFG00000013039 |
| ENSCAFG00000015326 | ENSCAFG00000013283 |
| ENSCAFG00000015345 | ENSCAFG00000013297 |
| ENSCAFG00000015539 | ENSCAFG00000013305 |
| ENSCAFG00000015625 | ENSCAFG00000013322 |
| ENSCAFG00000015731 | ENSCAFG00000013353 |
| ENSCAFG00000015788 | ENSCAFG00000013423 |
| ENSCAFG00000015902 | ENSCAFG00000013427 |
| ENSCAFG00000015903 | ENSCAFG00000013483 |
| ENSCAFG00000015918 | ENSCAFG00000013489 |
| ENSCAFG00000016072 | ENSCAFG00000013521 |
| ENSCAFG00000016192 | ENSCAFG00000013694 |
| ENSCAFG00000016265 | ENSCAFG00000013723 |
| ENSCAFG00000016338 | ENSCAFG00000013756 |
| ENSCAFG00000016423 | ENSCAFG00000013774 |
| ENSCAFG00000016479 | ENSCAFG00000013844 |
| ENSCAFG00000016550 | ENSCAFG00000013874 |
| ENSCAFG00000016679 | ENSCAFG00000013961 |
| ENSCAFG00000016755 | ENSCAFG00000014054 |
| ENSCAFG00000016769 | ENSCAFG00000014124 |
| ENSCAFG00000016811 | ENSCAFG00000014308 |
| ENSCAFG00000016828 | ENSCAFG00000014310 |
| ENSCAFG00000017050 | ENSCAFG00000014319 |
| ENSCAFG00000017080 | ENSCAFG00000014323 |
| ENSCAFG00000017326 | ENSCAFG00000014338 |
| ENSCAFG00000017329 | ENSCAFG00000014343 |
| ENSCAFG00000017397 | ENSCAFG00000014410 |
| ENSCAFG00000017612 | ENSCAFG00000014413 |
| ENSCAFG00000017615 | ENSCAFG00000014443 |
| ENSCAFG00000017655 | ENSCAFG00000014448 |
| ENSCAFG00000017702 | ENSCAFG00000014474 |
| ENSCAFG00000017705 | ENSCAFG00000014476 |
| ENSCAFG00000017883 | ENSCAFG00000014551 |
| ENSCAFG00000018017 | ENSCAFG00000014568 |
| ENSCAFG00000018020 | ENSCAFG00000014583 |
| ENSCAFG00000018047 | ENSCAFG00000014616 |
| ENSCAFG00000018127 | ENSCAFG00000014668 |
| ENSCAFG00000018175 | ENSCAFG00000014679 |
| ENSCAFG00000018194 | ENSCAFG00000014767 |
| ENSCAFG00000018277 | ENSCAFG00000014812 |
| ENSCAFG00000018314 | ENSCAFG00000014838 |
| ENSCAFG00000018360 | ENSCAFG00000014978 |
| ENSCAFG00000018405 | ENSCAFG00000015078 |
| ENSCAFG00000018415 | ENSCAFG00000015091 |
| ENSCAFG00000018457 | ENSCAFG00000015209 |
| ENSCAFG00000018560 | ENSCAFG00000015217 |
| ENSCAFG00000018576 | ENSCAFG00000015233 |
| ENSCAFG00000018586 | ENSCAFG00000015235 |

|                    |                    |
|--------------------|--------------------|
| ENSCAFG00000018602 | ENSCAFG00000015272 |
| ENSCAFG00000018621 | ENSCAFG00000015298 |
| ENSCAFG00000018643 | ENSCAFG00000015427 |
| ENSCAFG00000018670 | ENSCAFG00000015539 |
| ENSCAFG00000018702 | ENSCAFG00000015662 |
| ENSCAFG00000018761 | ENSCAFG00000015695 |
| ENSCAFG00000018785 | ENSCAFG00000015788 |
| ENSCAFG00000018825 | ENSCAFG00000015920 |
| ENSCAFG00000018864 | ENSCAFG00000015936 |
| ENSCAFG00000018959 | ENSCAFG00000015943 |
| ENSCAFG00000018982 | ENSCAFG00000015968 |
| ENSCAFG00000019014 | ENSCAFG00000016022 |
| ENSCAFG00000019134 | ENSCAFG00000016072 |
| ENSCAFG00000019166 | ENSCAFG00000016142 |
| ENSCAFG00000019177 | ENSCAFG00000016298 |
| ENSCAFG00000019183 | ENSCAFG00000016410 |
| ENSCAFG00000019189 | ENSCAFG00000016465 |
| ENSCAFG00000019230 | ENSCAFG00000016518 |
| ENSCAFG00000019242 | ENSCAFG00000016590 |
| ENSCAFG00000019489 | ENSCAFG00000016602 |
| ENSCAFG00000019541 | ENSCAFG00000016615 |
| ENSCAFG00000019601 | ENSCAFG00000016671 |
| ENSCAFG00000019694 | ENSCAFG00000016769 |
| ENSCAFG00000019764 | ENSCAFG00000016850 |
| ENSCAFG00000019837 | ENSCAFG00000016983 |
| ENSCAFG00000019852 | ENSCAFG00000016984 |
| ENSCAFG00000019914 | ENSCAFG00000017008 |
| ENSCAFG00000019956 | ENSCAFG00000017018 |
| ENSCAFG00000019964 | ENSCAFG00000017064 |
| ENSCAFG00000020004 | ENSCAFG00000017099 |
| ENSCAFG00000020110 | ENSCAFG00000017137 |
| ENSCAFG00000020133 | ENSCAFG00000017428 |
| ENSCAFG00000020145 | ENSCAFG00000017615 |
| ENSCAFG00000020153 | ENSCAFG00000017635 |
| ENSCAFG00000020166 | ENSCAFG00000017705 |
| ENSCAFG00000020270 | ENSCAFG00000017883 |
| ENSCAFG00000020345 | ENSCAFG00000017937 |
| ENSCAFG00000020713 | ENSCAFG00000017952 |
| ENSCAFG00000022843 | ENSCAFG00000018175 |
| ENSCAFG00000023094 | ENSCAFG00000018197 |
| ENSCAFG00000023339 | ENSCAFG00000018272 |
| ENSCAFG00000023757 | ENSCAFG00000018277 |
| ENSCAFG00000023759 | ENSCAFG00000018323 |
| ENSCAFG00000023904 | ENSCAFG00000018360 |
| ENSCAFG00000024609 | ENSCAFG00000018422 |
| ENSCAFG00000024731 | ENSCAFG00000018457 |
| ENSCAFG00000024901 | ENSCAFG00000018461 |
| ENSCAFG00000024908 | ENSCAFG00000018506 |
| ENSCAFG00000025213 | ENSCAFG00000018527 |
| ENSCAFG00000025295 | ENSCAFG00000018556 |

|                    |                    |
|--------------------|--------------------|
| ENSCAFG00000025390 | ENSCAFG00000018591 |
| ENSCAFG00000025555 | ENSCAFG00000018643 |
| ENSCAFG00000028459 | ENSCAFG00000018702 |
| ENSCAFG00000028490 | ENSCAFG00000018787 |
| ENSCAFG00000028544 | ENSCAFG00000018828 |
| ENSCAFG00000028594 | ENSCAFG00000018864 |
| ENSCAFG00000028636 | ENSCAFG00000018939 |
| ENSCAFG00000028647 | ENSCAFG00000019014 |
| ENSCAFG00000028653 | ENSCAFG00000019071 |
| ENSCAFG00000028761 | ENSCAFG00000019130 |
| ENSCAFG00000028802 | ENSCAFG00000019194 |
| ENSCAFG00000028808 | ENSCAFG00000019230 |
| ENSCAFG00000028817 | ENSCAFG00000019237 |
| ENSCAFG00000028877 | ENSCAFG00000019445 |
| ENSCAFG00000028947 | ENSCAFG00000019451 |
| ENSCAFG00000028958 | ENSCAFG00000019489 |
| ENSCAFG00000028982 | ENSCAFG00000019567 |
| ENSCAFG00000029004 | ENSCAFG00000019601 |
| ENSCAFG00000029130 | ENSCAFG00000019662 |
| ENSCAFG00000029304 | ENSCAFG00000019829 |
| ENSCAFG00000029322 | ENSCAFG00000019834 |
| ENSCAFG00000029381 | ENSCAFG00000019928 |
| ENSCAFG00000029612 | ENSCAFG00000020024 |
| ENSCAFG00000029673 | ENSCAFG00000020094 |
| ENSCAFG00000029856 | ENSCAFG00000020153 |
| ENSCAFG00000029937 | ENSCAFG00000020166 |
| ENSCAFG00000030025 | ENSCAFG00000020294 |
| ENSCAFG00000030105 | ENSCAFG00000020340 |
| ENSCAFG00000030120 | ENSCAFG00000020345 |
| ENSCAFG00000030170 | ENSCAFG00000020524 |
| ENSCAFG00000030198 | ENSCAFG00000020633 |
| ENSCAFG00000030242 | ENSCAFG00000020713 |
| ENSCAFG00000030310 | ENSCAFG00000022709 |
| ENSCAFG00000030348 | ENSCAFG00000022711 |
| ENSCAFG00000030412 | ENSCAFG00000022723 |
| ENSCAFG00000030416 | ENSCAFG00000022728 |
| ENSCAFG00000030425 | ENSCAFG00000022741 |
| ENSCAFG00000030538 | ENSCAFG00000022843 |
| ENSCAFG00000030662 | ENSCAFG00000023152 |
| ENSCAFG00000030686 | ENSCAFG00000023538 |
| ENSCAFG00000030835 | ENSCAFG00000023904 |
| ENSCAFG00000030867 | ENSCAFG00000024028 |
| ENSCAFG00000030932 | ENSCAFG00000024187 |
| ENSCAFG00000031172 | ENSCAFG00000024406 |
| ENSCAFG00000031239 | ENSCAFG00000024609 |
| ENSCAFG00000031299 | ENSCAFG00000024646 |
| ENSCAFG00000031392 | ENSCAFG00000024981 |
| ENSCAFG00000031481 | ENSCAFG00000025390 |
| ENSCAFG00000031894 | ENSCAFG00000025426 |
| ENSCAFG00000031936 | ENSCAFG00000025533 |

|                    |                    |
|--------------------|--------------------|
| ENSCAFG00000031938 | ENSCAFG00000027573 |
| ENSCAFG00000032024 | ENSCAFG00000028459 |
| ENSCAFG00000032029 | ENSCAFG00000028490 |
| ENSCAFG00000032032 | ENSCAFG00000028506 |
| ENSCAFG00000032043 | ENSCAFG00000028594 |
| ENSCAFG00000032089 | ENSCAFG00000028647 |
| ENSCAFG00000032120 | ENSCAFG00000028653 |
| ENSCAFG00000032235 | ENSCAFG00000028708 |
| ENSCAFG00000032286 | ENSCAFG00000028761 |
| ENSCAFG00000032392 | ENSCAFG00000028779 |
| ENSCAFG00000032403 | ENSCAFG00000028785 |
| ENSCAFG00000032684 | ENSCAFG00000028817 |
| ENSCAFG00000032697 | ENSCAFG00000028947 |
| ENSCAFG00000032896 | ENSCAFG00000028958 |
| ENSCAFG00000033011 | ENSCAFG00000029004 |
| ENSCAFG00000033248 | ENSCAFG00000029304 |
| ENSCAFG00000033312 | ENSCAFG00000029359 |
| ENSCAFG00000033759 | ENSCAFG00000029425 |
| ENSCAFG00000034213 | ENSCAFG00000029474 |
| ENSCAFG00000034853 | ENSCAFG00000029856 |
| ENSCAFG00000034881 | ENSCAFG00000029969 |
| ENSCAFG00000035036 | ENSCAFG00000030058 |
| ENSCAFG00000035199 | ENSCAFG00000030198 |
| ENSCAFG00000035834 | ENSCAFG00000030320 |
| ENSCAFG00000036200 | ENSCAFG00000030445 |
| ENSCAFG00000036350 | ENSCAFG00000030466 |
| ENSCAFG00000037515 | ENSCAFG00000030588 |
| ENSCAFG00000037835 | ENSCAFG00000030617 |
| ENSCAFG00000038320 | ENSCAFG00000030715 |
| ENSCAFG00000038468 | ENSCAFG00000030875 |
| ENSCAFG00000038545 | ENSCAFG00000030990 |
| ENSCAFG00000038812 | ENSCAFG00000030999 |
|                    | ENSCAFG00000031124 |
|                    | ENSCAFG00000031234 |
|                    | ENSCAFG00000031239 |
|                    | ENSCAFG00000031437 |
|                    | ENSCAFG00000031481 |
|                    | ENSCAFG00000031706 |
|                    | ENSCAFG00000031759 |
|                    | ENSCAFG00000031936 |
|                    | ENSCAFG00000031973 |
|                    | ENSCAFG00000032024 |
|                    | ENSCAFG00000032043 |
|                    | ENSCAFG00000032112 |
|                    | ENSCAFG00000032120 |
|                    | ENSCAFG00000032127 |
|                    | ENSCAFG00000032147 |
|                    | ENSCAFG00000032235 |
|                    | ENSCAFG00000032286 |
|                    | ENSCAFG00000032331 |

ENSCAFG00000032339  
ENSCAFG00000032391  
ENSCAFG00000032403  
ENSCAFG00000032412  
ENSCAFG00000032457  
ENSCAFG00000032489  
ENSCAFG00000032569  
ENSCAFG00000032571  
ENSCAFG00000032608  
ENSCAFG00000032684  
ENSCAFG00000032896  
ENSCAFG00000032930  
ENSCAFG00000033011  
ENSCAFG00000033086  
ENSCAFG00000033248  
ENSCAFG00000033312  
ENSCAFG00000033759  
ENSCAFG00000035036  
ENSCAFG00000035199  
ENSCAFG00000035325  
ENSCAFG00000035481  
ENSCAFG00000037282  
ENSCAFG00000037891  
ENSCAFG00000038320  
ENSCAFG00000038722  
ENSCAFG00000039524  
ENSCAFG00000039836  
ENSCAFG00000039851  
ENSCAFG00000040231  
ENSCAFG00000040365  
ENSCAFG00000040534  
ENSCAFG00000040611



| ensembl ID         | Gene name | log FC Vastus | Pvalue Vastus | logFC Biceps | Pvalue Biceps |
|--------------------|-----------|---------------|---------------|--------------|---------------|
| ENSCAFG00000020166 | ANGPTL2   | 2.573477699   | 7.16E-11      | 2.637073401  | 3.37E-08      |
| ENSCAFG00000007945 | PROCR     | 2.330769255   | 2.51E-10      | 2.120957359  | 4.34E-05      |
| ENSCAFG00000017883 | NRK       | 4.56944269    | 2.99E-09      | 5.018412332  | 3.84E-05      |
| ENSCAFG00000014308 | ALAS2     | 2.022795179   | 4.53E-09      | 1.551459344  | 0.000124881   |
| ENSCAFG00000008977 | LRP4      | 2.637229703   | 4.82E-08      | 1.641310401  | 0.005441352   |
| ENSCAFG00000014978 | PIK3R2    | 2.333590538   | 1.59E-07      | 1.513989504  | 0.000142868   |
| ENSCAFG00000014310 | APEX2     | 2.030600222   | 2.09E-07      | 1.530155574  | 0.000101844   |
| ENSCAFG00000009978 | ETS2      | 1.883296077   | 3.39E-07      | 1.876608064  | 7.08E-05      |
| ENSCAFG00000018702 | EFCAB7    | -2.524855109  | 9.40E-07      | -2.44506268  | 0.000325149   |
| ENSCAFG00000012803 | RIN1      | 3.155806278   | 1.42E-06      | 3.401147284  | 4.51E-07      |
| ENSCAFG00000012095 | AHDC1     | 1.437749831   | 1.51E-06      | 1.115106058  | 6.09E-05      |
| ENSCAFG0000001596  | FOXP4     | 2.091095449   | 3.82E-06      | 1.408734717  | 0.002101039   |
| ENSCAFG00000010121 | CD81      | 1.393565596   | 4.59E-06      | 1.451217502  | 7.66E-05      |
| ENSCAFG00000018457 | NT5M      | -2.678846074  | 5.02E-06      | -1.919813512 | 0.003964532   |
| ENSCAFG00000020153 | MTSS1L    | 1.737018296   | 5.57E-06      | 1.5078105    | 0.000541826   |
| ENSCAFG00000015078 | FAM184B   | 2.420010828   | 7.78E-06      | 2.424280973  | 0.000886408   |
| ENSCAFG00000002830 | RIMS3     | -3.512294484  | 1.20E-05      | -3.999533931 | 1.15E-05      |
| ENSCAFG00000010090 | IGF2      | 3.240827274   | 1.30E-05      | 3.259644778  | 6.39E-07      |
| ENSCAFG00000015217 | NA        | -2.109544247  | 1.43E-05      | -1.689554354 | 0.013928389   |
| ENSCAFG00000006877 | FAM110A   | 1.963890232   | 1.43E-05      | 2.131168973  | 0.002638577   |
| ENSCAFG00000009337 | TUBB2A    | 3.250224395   | 1.47E-05      | 3.341008052  | 1.38E-06      |
| ENSCAFG00000013423 | FUOM      | -2.263366815  | 1.50E-05      | -1.046372489 | 0.044613704   |
| ENSCAFG00000028817 | CFD       | 1.662655693   | 1.54E-05      | 1.380211507  | 0.013706042   |
| ENSCAFG00000028459 | MT3       | 6.12600805    | 1.89E-05      | 2.874403739  | 0.000442778   |
| ENSCAFG00000032896 | NA        | 2.943493356   | 2.03E-05      | 1.965894354  | 0.001311705   |
| ENSCAFG00000015209 | TUBA4A    | -2.085553592  | 2.82E-05      | -1.515768766 | 0.021585318   |
| ENSCAFG00000013521 | POLA1     | 1.384198517   | 3.01E-05      | 1.077368258  | 0.000995174   |
| ENSCAFG00000002319 | KIAA1211L | 3.749003388   | 3.44E-05      | 1.907256967  | 0.009845522   |
| ENSCAFG00000013283 | CHRNA1    | 3.815468255   | 3.47E-05      | 2.96060933   | 6.85E-06      |
| ENSCAFG00000010288 | MYBPH     | 5.729872752   | 5.01E-05      | 3.526195702  | 0.000133461   |
| ENSCAFG00000033248 | NA        | -3.429665114  | 6.00E-05      | -3.896208293 | 5.12E-05      |
| ENSCAFG0000003775  | OSR1      | 2.733224827   | 6.01E-05      | 3.071399948  | 0.001363765   |
| ENSCAFG00000032024 | GPR162    | -2.463949496  | 6.21E-05      | -2.026932174 | 0.018745273   |
| ENSCAFG0000001556  | KCNK17    | 2.305177845   | 7.20E-05      | 1.911230967  | 0.003774034   |
| ENSCAFG00000013483 | TMEM120A  | -1.405061093  | 7.87E-05      | -1.025962526 | 0.045893036   |
| ENSCAFG00000004127 | SESN3     | 2.678404538   | 7.91E-05      | 2.238837004  | 0.000578787   |
| ENSCAFG00000014448 | ZNF804A   | 3.324081824   | 8.51E-05      | 2.829881295  | 0.000117067   |
| ENSCAFG00000005564 | UCP2      | 1.582672682   | 9.22E-05      | 1.729419299  | 4.62E-05      |
| ENSCAFG00000017705 | ARMCX2    | 2.602599203   | 9.83E-05      | 2.429860868  | 5.15E-05      |
| ENSCAFG00000009673 | NA        | -1.451656986  | 0.000133089   | -1.369613923 | 0.004272252   |
| ENSCAFG00000001649 | GCNT1     | 3.056173032   | 0.000239287   | 1.866030583  | 0.025295475   |
| ENSCAFG00000032403 | MAP3K7CL  | 2.373587607   | 0.000262929   | 1.506872976  | 0.010099551   |
| ENSCAFG00000032286 | NA        | 3.21861502    | 0.000368607   | 1.466980073  | 0.01471161    |
| ENSCAFG00000006053 | NA        | 2.410434605   | 0.000370765   | 2.246004545  | 1.22E-06      |
| ENSCAFG00000023904 | CHRNB4    | 2.994776744   | 0.000373308   | 2.26396907   | 0.009967129   |
| ENSCAFG00000028947 | ELN       | 2.210170418   | 0.000433772   | 1.864150435  | 0.004925185   |
| ENSCAFG00000019014 | SEMA6B    | 2.027154129   | 0.000466259   | 2.048619684  | 0.000561256   |
| ENSCAFG00000032684 | NA        | 3.042024837   | 0.000473205   | 1.437491761  | 0.020298494   |
| ENSCAFG00000003096 | PM20D2    | 1.866701978   | 0.000482124   | 2.336963026  | 0.004242597   |
| ENSCAFG00000018864 | GPC3      | 3.637905291   | 0.000488242   | 2.009393493  | 0.015967856   |
| ENSCAFG00000004331 | PIK3R3    | 2.077663616   | 0.000552383   | 1.270081878  | 0.039598955   |
| ENSCAFG00000031239 | NA        | 3.005095626   | 0.000570039   | 1.531756813  | 0.018976557   |
| ENSCAFG00000028647 | BGLAP     | 2.961988926   | 0.000994914   | 2.262867137  | 0.003702656   |
| ENSCAFG00000028958 | TCEAL7    | 2.531827754   | 0.001014956   | 3.720930568  | 0.000117802   |
| ENSCAFG00000030198 | NA        | 2.498094202   | 0.001063778   | 2.038077922  | 0.027056915   |

|                    |          |              |             |              |             |
|--------------------|----------|--------------|-------------|--------------|-------------|
| ENSCAFG00000018360 | NA       | 3.632723822  | 0.001075597 | 4.532980409  | 9.56E-05    |
| ENSCAFG00000031481 | NA       | -3.618944662 | 0.001123586 | -2.091596739 | 0.004392384 |
| ENSCAFG00000004746 | XRCC1    | 1.336406212  | 0.001164325 | 1.493674945  | 0.000464378 |
| ENSCAFG00000009333 | CESdD1   | -2.376497003 | 0.001251065 | -3.438820309 | 0.001873815 |
| ENSCAFG00000015539 | PAX7     | 1.395532008  | 0.0013233   | 1.49491956   | 0.01514561  |
| ENSCAFG00000012904 | CDK1     | 1.762730567  | 0.001338037 | 1.86908997   | 0.0303179   |
| ENSCAFG00000000611 | MEGF10   | 1.239697597  | 0.001356059 | 1.043025106  | 0.022379382 |
| ENSCAFG00000004297 | CCDC8    | 3.386229398  | 0.001407136 | 3.579305268  | 4.82E-08    |
| ENSCAFG00000008062 | NA       | -1.837269893 | 0.001471419 | -2.65424783  | 0.003323827 |
| ENSCAFG00000032043 | NA       | -2.20433237  | 0.001678703 | -1.939727179 | 0.001209714 |
| ENSCAFG00000001909 | KIF24    | 1.81716916   | 0.001685762 | 1.588874132  | 0.019182574 |
| ENSCAFG00000011283 | CHRND    | 4.316764066  | 0.001712996 | 3.55885821   | 0.000866569 |
| ENSCAFG00000024609 | CNTN2    | 2.872419854  | 0.001725726 | 2.173429773  | 0.001163142 |
| ENSCAFG00000028761 | NA       | 1.789993968  | 0.001797349 | 1.358414372  | 0.04874407  |
| ENSCAFG00000029004 | NA       | -1.599186648 | 0.002268363 | -1.282023553 | 0.000261259 |
| ENSCAFG00000004731 | TENM4    | 1.9804845    | 0.002295963 | 1.215926441  | 0.015058305 |
| ENSCAFG00000016769 | NES      | 1.905412123  | 0.002378304 | 1.588578298  | 0.000185377 |
| ENSCAFG00000004820 | ITGA9    | 1.722472476  | 0.00240463  | 1.745010553  | 0.011866798 |
| ENSCAFG00000010654 | AGPAT3   | -1.181973406 | 0.002425076 | -1.539330593 | 0.000540829 |
| ENSCAFG00000004481 | SLC6A6   | 1.975231116  | 0.002518781 | 1.469677251  | 0.01518367  |
| ENSCAFG00000012824 | SCN4B    | -1.59412924  | 0.002692617 | -1.504353536 | 0.011297857 |
| ENSCAFG00000006006 | FASN     | 1.832543195  | 0.002831356 | 1.294402294  | 0.001018038 |
| ENSCAFG00000028653 | NA       | 3.005018503  | 0.002895369 | 1.907294955  | 0.005967732 |
| ENSCAFG00000000097 | ERBB3    | 2.836526719  | 0.003004938 | 1.998549435  | 0.033243834 |
| ENSCAFG00000018277 | CKB      | 2.255816402  | 0.003192217 | 2.127094967  | 0.002477956 |
| ENSCAFG00000025390 | SLC22A17 | 2.258264891  | 0.003516952 | 2.037490459  | 7.29E-05    |
| ENSCAFG00000012376 | VASH2    | 2.084699386  | 0.003572492 | 2.13234889   | 0.002908275 |
| ENSCAFG00000018643 | SLC25A23 | 1.637985631  | 0.003785276 | 2.196647327  | 0.001546382 |
| ENSCAFG00000004636 | BCAM     | 1.431501768  | 0.004542265 | 1.295091518  | 0.003081894 |
| ENSCAFG00000010936 | NPNT     | 2.260581185  | 0.005488884 | 3.560697738  | 2.55E-06    |
| ENSCAFG00000017615 | ST8SIA5  | -1.236747114 | 0.005677044 | -1.110632021 | 0.005813318 |
| ENSCAFG00000014054 | ACHE     | 2.39967239   | 0.005847406 | 1.710129314  | 0.048663979 |
| ENSCAFG00000022843 | NA       | 2.622702983  | 0.006007069 | 3.958896054  | 3.01E-05    |
| ENSCAFG00000019230 | ATP2B3   | 1.951482529  | 0.006389196 | 1.70976847   | 0.048857846 |
| ENSCAFG00000012525 | MUC13    | 3.62251399   | 0.006464476 | 4.227125415  | 3.81E-05    |
| ENSCAFG00000001793 | BTBD11   | 1.551643808  | 0.00653172  | 1.598625367  | 0.000403856 |
| ENSCAFG00000005433 | ABCC4    | -1.235849924 | 0.006665142 | -1.052007752 | 0.023438786 |
| ENSCAFG00000029304 | NA       | 2.581346343  | 0.006723539 | 4.270157482  | 7.95E-06    |
| ENSCAFG00000028490 | NA       | 2.134516548  | 0.008739537 | 1.789188253  | 0.032227547 |
| ENSCAFG00000010309 | MYOG     | 1.52088885   | 0.009245696 | 1.845085992  | 0.000214655 |
| ENSCAFG00000028594 | NA       | 2.538790086  | 0.009764673 | 3.791728862  | 3.18E-05    |
| ENSCAFG00000020345 | PTGFR    | -1.882157801 | 0.009963985 | -2.753228159 | 0.00230441  |
| ENSCAFG00000007562 | AMPD3    | 1.849416153  | 0.01014497  | 2.671833403  | 0.002075467 |
| ENSCAFG00000014124 | CHCHD10  | -1.597283739 | 0.010210759 | -1.340562915 | 0.001679647 |
| ENSCAFG00000035199 | NA       | 2.07300263   | 0.010484605 | 3.601068114  | 0.000318009 |
| ENSCAFG00000016072 | NA       | 1.103191687  | 0.011734775 | 1.667366588  | 0.014967357 |
| ENSCAFG00000004769 | OPTN     | -1.512936657 | 0.011889457 | -1.375357781 | 2.56E-05    |
| ENSCAFG00000012742 | MTFP1    | -1.929641457 | 0.012633578 | -1.538109123 | 0.002995437 |
| ENSCAFG00000014410 | CHST3    | 1.156284932  | 0.012681418 | 1.108767486  | 0.029641832 |
| ENSCAFG00000000124 | TIMELESS | 1.393514773  | 0.013025503 | 1.664271664  | 0.000601602 |
| ENSCAFG00000014551 | GAL3ST4  | 1.729897576  | 0.013455288 | 1.78265139   | 0.023465333 |
| ENSCAFG00000008707 | CKMT2    | -1.513175637 | 0.014869607 | -1.217424522 | 0.002846116 |
| ENSCAFG00000033011 | NA       | -2.743409349 | 0.015945439 | -2.74985822  | 0.019972755 |
| ENSCAFG00000008786 | NNAT     | 1.385895771  | 0.017606039 | 1.860409249  | 0.000386359 |
| ENSCAFG00000004958 | ATP1A3   | -1.916108938 | 0.019185539 | -2.120277144 | 0.002303361 |
| ENSCAFG00000035036 | NA       | -1.682876794 | 0.019500818 | -1.834187032 | 0.024883428 |

|                    |          |              |             |              |             |
|--------------------|----------|--------------|-------------|--------------|-------------|
| ENSCAFG00000010175 | CDH22    | -1.376839677 | 0.019541391 | -2.459550185 | 0.001622257 |
| ENSCAFG00000005294 | TK1      | 1.370300308  | 0.020792332 | 1.779067613  | 1.88E-05    |
| ENSCAFG00000029856 | NA       | 10.4738747   | 0.020926299 | 8.020069827  | 0.020049372 |
| ENSCAFG00000032235 | NA       | 1.063675433  | 0.022272439 | 1.144905011  | 0.008093552 |
| ENSCAFG00000010588 | MARCKSL1 | 1.800448811  | 0.022793028 | 2.770710906  | 0.002324573 |
| ENSCAFG00000005348 | EHD3     | 1.844069921  | 0.025868063 | 1.994919366  | 0.010967516 |
| ENSCAFG00000011378 | ANKRD34A | 1.637426544  | 0.027794058 | 2.50229108   | 0.016144896 |
| ENSCAFG00000009066 | MYOD1    | 1.704728854  | 0.029840809 | 1.279295476  | 0.017776792 |
| ENSCAFG00000012925 | PHKA2    | 1.382655474  | 0.032619048 | 1.307547992  | 0.04544663  |

Table S6: Correlation analysis between the expression changes observed in XLMTM dogs and Mtm1 KO mice for the 87 differentially expressed genes detected in both species.

| ensembl ID         | Gene name | log FC dogs  | log FC mice |
|--------------------|-----------|--------------|-------------|
| ENSCAFG00000011513 | ABLIM1    | 1.73670291   | 1.489       |
| ENSCAFG00000012181 | ACTC1     | 3.772649425  | -2.867      |
| ENSCAFG00000016453 | ADGRL1    | 1.307586207  | -0.711      |
| ENSCAFG00000012013 | ANPEP     | 1.834642459  | 1.053       |
| ENSCAFG00000016550 | ASB12     | -1.234678707 | -0.766      |
| ENSCAFG00000010942 | CCDC91    | -1.22278308  | -0.919      |
| ENSCAFG00000029853 | CDKN1A    | 2.880122608  | 3.665       |
| ENSCAFG00000013283 | CHRNA1    | 3.815468255  | 2.206       |
| ENSCAFG00000011283 | CHRND     | 4.316764066  | 3.037       |
| ENSCAFG00000024807 | CHRNA1    | 6.422497873  | 3.662       |
| ENSCAFG00000017138 | CILP      | 2.340963786  | 3.274       |
| ENSCAFG00000006035 | COL6A6    | 1.373634224  | -0.721      |
| ENSCAFG00000008761 | CX3CL1    | -1.631523824 | 2.749       |
| ENSCAFG00000006231 | DCLK1     | 3.592784876  | 1.394       |
| ENSCAFG00000009653 | DOP1B     | 2.080276665  | -0.853      |
| ENSCAFG00000002919 | EFEMP1    | 1.429460589  | -0.953      |
| ENSCAFG00000011772 | EGLN1     | -1.064307644 | -0.655      |
| ENSCAFG00000009869 | EHD4      | 1.260345827  | 0.824       |
| ENSCAFG00000018959 | EMP2      | 1.219309968  | 1.535       |
| ENSCAFG00000014323 | EPHB2     | 2.391796378  | 1.419       |
| ENSCAFG00000028669 | FAM171B   | 1.876683757  | 1.347       |
| ENSCAFG00000015272 | FGFBP1    | -3.536343867 | -3.299      |
| ENSCAFG00000016518 | FGFR4     | 1.145955705  | -1.779      |
| ENSCAFG00000002105 | FHL2      | 1.817158446  | 1.826       |
| ENSCAFG00000006019 | FREM2     | 1.997135963  | 1.959       |
| ENSCAFG00000018405 | FST       | 4.433409456  | 1.519       |
| ENSCAFG00000006421 | GAS6      | -1.009584253 | 0.808       |
| ENSCAFG00000012428 | HES6      | 1.36513027   | 0.876       |
| ENSCAFG00000002576 | HIVEP3    | 2.159868089  | 1.269       |
| ENSCAFG00000009074 | HOMER1    | -1.107945461 | -1.426      |
| ENSCAFG00000001336 | ISCA1     | -1.007809986 | -0.728      |
| ENSCAFG00000005037 | KLF5      | 1.236429367  | 1.881       |
| ENSCAFG00000006840 | LDLRAD3   | 1.386681603  | 1.101       |
| ENSCAFG00000005960 | LRRN1     | 1.468728589  | 1.274       |
| ENSCAFG00000016465 | MAGED2    | 1.263446026  | 0.739       |
| ENSCAFG00000010758 | MAP2K6    | 1.574037058  | -1.483      |
| ENSCAFG00000005963 | METTL21C  | -4.337630234 | -2.716      |
| ENSCAFG00000009110 | MT1E      | 1.684552853  | 3.302       |
| ENSCAFG00000023759 | MT2A      | 2.547857727  | 4.818       |
| ENSCAFG00000028459 | MT3       | 6.12600805   | 4.655       |
| ENSCAFG00000013728 | MYL4      | 3.638724975  | 3.71        |
| ENSCAFG00000010309 | MYOG      | 1.52088885   | 1.958       |
| ENSCAFG00000009777 | NAV2      | 2.360013976  | 1.107       |
| ENSCAFG00000013844 | NCAM1     | 3.120117838  | 1.531       |
| ENSCAFG00000016769 | NES       | 1.905412123  | 1.45        |
| ENSCAFG00000003720 | NRCAM     | 4.283879136  | 1.864       |

|                     |            |              |        |
|---------------------|------------|--------------|--------|
| ENSCAFG00000032227  | OLFM1      | 2.018599342  | 0.883  |
| ENSCAFG00000015539  | PAX7       | 1.395532008  | -1.376 |
| ENSCAFG00000010225  | PHKB       | -1.025976526 | -1.095 |
| ENSCAFG00000009076  | PLBD2      | 2.689637486  | 0.7    |
| ENSCAFG00000005362  | PLD3       | 1.089200362  | 0.973  |
| ENSCAFG00000003096  | PM20D2     | 1.866701978  | -2.123 |
| ENSCAFG00000018654  | PRR32      | 2.403978145  | 3.226  |
| ENSCAFG00000001646  | PRUNE2     | 3.399318155  | 2.448  |
| ENSCAFG00000005870  | RASGRP3    | -1.037928066 | -1.032 |
| ENSCAFG00000006528  | RASSF7     | 1.720814154  | 3.01   |
| ENSCAFG00000012803  | RIN1       | 3.155806278  | 2.583  |
| ENSCAFG00000009596  | RUNX1      | 2.563379593  | 2.759  |
| ENSCAFG00000005839  | SATB1      | -1.232135107 | -1.032 |
| ENSCAFG00000012082  | SEMA4B     | 1.228537847  | 1.143  |
| ENSCAFG00000012290  | SFN        | 1.462504245  | 2.642  |
| ENSCAFG00000019194  | SLC43A2    | 1.785886391  | 1.035  |
| ENSCAFG00000008028  | SLC9A9     | 1.345211158  | 1.247  |
| ENSCAFG00000012460  | SMYD2      | -1.16803138  | -1.346 |
| ENSCAFG00000004374  | SOX9       | 2.155439117  | 1.965  |
| ENSCAFG00000004500  | SYTL2      | -1.06740374  | -1.759 |
| ENSCAFG000000032112 | TAL2       | 2.94392871   | 1.918  |
| ENSCAFG00000011533  | TARBP1     | 1.065472211  | -1.641 |
| ENSCAFG00000012517  | TMOD4      | -1.118371009 | -0.822 |
| ENSCAFG00000010798  | TNNT2      | 3.137959501  | 1.868  |
| ENSCAFG00000014443  | TSC22D4    | 1.17473527   | 1.301  |
| ENSCAFG00000009337  | TUBB2A     | 3.250224395  | 1.063  |
| ENSCAFG00000018832  | TUBB6      | 1.60572272   | 2.568  |
| ENSCAFG00000015878  | UCHL1      | 1.546077843  | 3.884  |
| ENSCAFG00000013489  | UCK2       | 1.936783208  | 1.469  |
| ENSCAFG00000012376  | VASH2      | 2.084699386  | 1.714  |
| ENSCAFG00000013039  | ZNF365     | -1.070865273 | 2.396  |
| ENSCAFG00000015731  | ZNF385C    | 4.692270181  | 3.38   |
| ENSCAFG00000001985  | ENSMUSG000 | 1.039690188  | 2.188  |
| ENSCAFG00000003564  | ENSMUSG000 | 1.015664287  | 0.849  |
| ENSCAFG00000003676  | ENSMUSG000 | -1.074228768 | -1.857 |
| ENSCAFG00000004124  | ENSMUSG000 | 1.144810094  | 1.034  |
| ENSCAFG00000009113  | ENSMUSG000 | 1.662637003  | 3.302  |
| ENSCAFG00000011368  | ENSMUSG000 | 1.480762529  | -1.692 |
| ENSCAFG00000023152  | ENSMUSG000 | 1.153009884  | 1.008  |
| ENSCAFG00000030662  | ENSMUSG000 | 3.778100823  | 3.483  |
| ENSCAFG00000032235  | ENSMUSG000 | 1.063675433  | -1.146 |

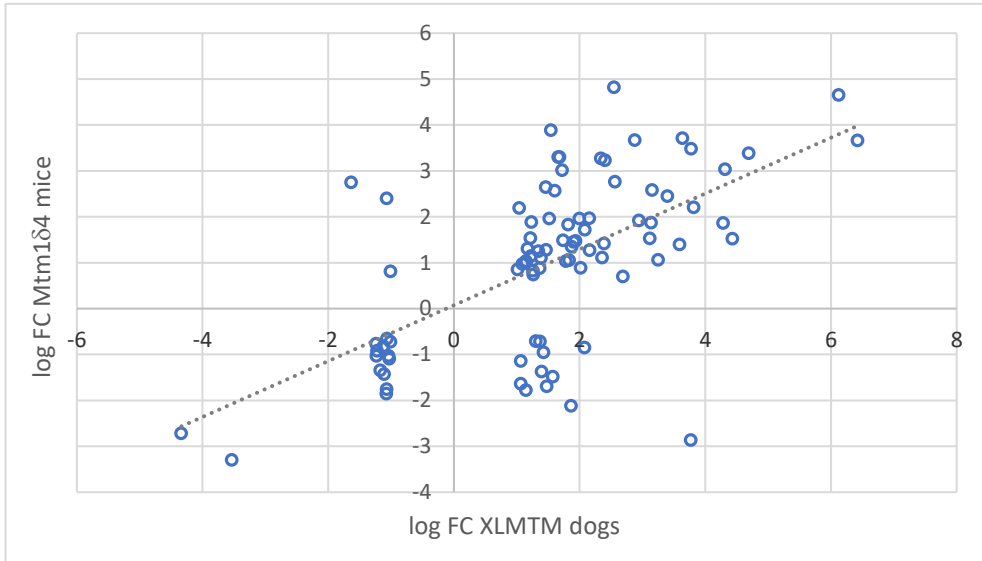

Spearman rank correlation  $r = 0.6$   
p-value  $1.1E-9$

## Supplemental Methods:

Detailed below is the raw R code used to analyse the RNA-sequencing count tables

```
# Import .csv files: read counts (count_table.csv), information about
samples and groups (samples_info.csv), and gene annotation file
(gene_info.csv)
> samples_info <- read_csv("samples_info.csv")
> count_table <- read_csv("count_table.csv")
> gene_info <- read_csv("gene_info.csv")

# Call the packages necessary for data processing and analysis
> library(limma)
> library(edgeR)
> library(genefilter)
> library(pheatmap)
> library(viridis)
> library(dplyr)

# Reformat count_table into a matrix of counts with row.names corresponding
to the column of gene_info which will be used for gene annotation (e.g.
ensembl identifiers). Requires same number of lines in count_table.csv and
gene_info.csv
> Mat<-as.matrix(count_table[,2:14])
> row.names(Mat)<-count_table$Gene_id

# Create a DGEList object, filtering off the genes not expressed in any dog
> DGE<-DGEList(counts=Mat, lib.size=colSums(Mat),
norm.factors=rep(1,ncol(Mat)), samples=samples_info, genes=gene_info,
remove.zeros=TRUE)
Removing x rows with all zero counts

# Transform raw counts into count per million reads (cpm), and log(cpm)
> DGEcpm<-cpm(DGE, log=FALSE)
> DGElcpm<-cpm(DGE, log=TRUE)

# keep only genes with cpm>1 in at least 3 Dogs
> keep.exprs<-rowSums(DGEcpm>1)>=3
> DGE<-DGE[keep.exprs, , keep.lib.sizes=FALSE]
> DGElcpm<-cpm(DGE, log=TRUE)

# incorporate normalization (scaling) factors to reduce heteroscedasticity,
using the trimmed mean of M-values (TMM) method
> DGE<-calcNormFactors(DGE, method="TMM")

# Genewise Negative Binomial Generalized Linear Fitting using the edgeR
package
> design<-model.matrix(~0+Treatment)
> colnames(design)<-gsub("Treatment", "", colnames(design))
# 'Treatment' corresponds to the name of the column in the
"samples_info.csv" file on which the statistical comparison is performed.
> estdisp<-estimateDisp(BicepsDGE, design)
> fit<-glmFit(estdisp, design)

# Factors=c("AAVHigh", "AAVLow", "AAVMid", "WT", "None")
> lrt<-glmLRT(fit, contrast=c(0,0,0,-1,1)) # hence contrast=None-WT

# Subset DE genes: p value ≤ 0.05 & fold change ≥ 2 or ≤ -2
> DE_genes<-lrt[which(lrt$table$PValue<=0.05 & abs(lrt$table$logFC)>1),]

# Same analysis done for contrast=c(1,0,0,0,-1), named lrt2 and DE_genes2
```

```

and c(1,0,0,-1,0), named lrt3 and DE_genes3

# Extract list of Rescued genes in AAVHigh dogs = common genes between
DE_genes and DE_genes2 that are not present in DE_genes3
> RescHigh<-dplyr::semi_join(DE_genes$genes, DE_genes2$genes, by="X1")
> RescHigh<-dplyr::anti_join(RescHigh, DE_genes3$genes, by="X1")

# Extract list of Resistant genes in AAVHigh dogs = common genes between
DE_genes1 and DE_genes3 that are not present in DE_genes2
> ResistHigh<-dplyr::semi_join(DE_genes$genes, DE_genes3$genes, by="X1")
> ResistHigh<-dplyr::anti_join(ResistHigh, DE_genes2$genes, by="X1")

# Extract list of Induced genes in AAVHigh dogs = common genes between
DE_genes2 and DE_genes3 that are not present in DE_genes
> IndHigh<-dplyr::semi_join(DE_genes2true$genes, DE_genes3$genes, by="X1")
> IndHigh<-dplyr::anti_join(IndHigh, DE_genes$genes, by="X1")

# Extract list of DE genes that are present in DE_genes, DE_genes2, and
DE_genes3.
> TriHigh<-dplyr::intersect(DE_genes$genes, DE_genes2$genes)
> TriHigh<-dplyr::intersect(TriHigh, DE_genes3$genes)
> length(TriHigh$X1)

# Create a matrix with grouped median lcpm values of TriHigh genes
> TriHighMat<-matrix(c(1:12),nrow=4,ncol=3)
> row.names(TriHighMat)<-TriHigh$X1
> colnames(TriHighMat)<-c("WT","XLMTM","AAVHigh")
> for(i in 1:4){
+   TriHighMat[i,1]<-(DGEIcpm[TriHigh[i,1],1]+DGEIcpm[TriHigh[i,1],7])/2
+   TriHighMat[i,2]<-
(DGEIcpm[TriHigh[i,1],4]+DGEIcpm[TriHigh[i,1],8]+DGEIcpm[TriHigh[i,1],10])/
3
+   TriHighMat[i,3]<-
(DGEIcpm[TriHigh[i,1],12]+DGEIcpm[TriHigh[i,1],13])/2
+   }

# Use operators to extract lists of Partially Rescued and Worsened genes
> PartHigh<-which((TriHighMat[,1]<TriHighMat[,3] &
TriHighMat[,3]<TriHighMat[,2]) | (TriHighMat[,1]>TriHighMat[,3] &
TriHighMat[,3]>TriHighMat[,2]))
> WorHigh<-which((TriHighMat[,1]<TriHighMat[,2] &
TriHighMat[,2]<TriHighMat[,3]) | (TriHighMat[,1]>TriHighMat[,2] &
TriHighMat[,2]>TriHighMat[,3]))

# Similar analyses can be performed for AAVMid and AAVLow dogs by changing
the contrasts taken as inputs for lrt2 and lrt3

```
