# Supplementary material
Source: PubMed Central journal article supplement (PMC7000997)
Supplement: mmc2.pdf [file mmc2.pdf]

# AAV-Mediated Gene Transfer Restores a Normal Muscle Transcriptome in a Canine Model of X-Linked Myotubular Myopathy

Jean-Baptiste Dupont,<sup>1</sup> Jianjun Guo,<sup>3,7</sup> Edith Renaud-Gabardos,<sup>4</sup> Karine Poulard,<sup>4</sup> Virginie Latournerie,<sup>4</sup> Michael W. Lawlor,<sup>5</sup> Robert W. Grange,<sup>6</sup> John T. Gray,<sup>3,8</sup> Ana Buj-Bello,<sup>4</sup> Martin K. Childers,<sup>1,9</sup> and David L. Mack<sup>1,2</sup>

<sup>1</sup>Department of Rehabilitation Medicine, Institute for Stem Cell and Regenerative Medicine, University of Washington, Seattle, WA 98109, USA; <sup>2</sup>Department of Bioengineering, University of Washington, Seattle, WA 98109, USA; <sup>3</sup>Audentes Therapeutics, San Francisco, CA 94108, USA; <sup>4</sup>Genethon, INSERM UMR S951, Université Evry Val-d'Essonne, Université Paris-Saclay, 91000 Evry, France; <sup>5</sup>Department of Pathology and Laboratory Medicine and Neuroscience Research Center, Medical College of Wisconsin, Milwaukee, WI 53226, USA; <sup>6</sup>Department of Human Nutrition, Foods, and Exercise, Virginia Polytechnic Institute and State University, Blacksburg, VA 24060, USA

**Multiple clinical trials employing recombinant adeno-associated viral (rAAV) vectors have been initiated for neuromuscular disorders, including Duchenne and limb-girdle muscular dystrophies, spinal muscular atrophy, and recently X-linked myotubular myopathy (XLMTM). Our previous work on a canine model of XLMTM showed that a single rAAV8-cMTM1 systemic infusion corrected structural abnormalities within the muscle and restored contractile function, with affected dogs surviving more than 4 years post injection. This remarkable therapeutic efficacy presents a unique opportunity to identify the downstream molecular drivers of XLMTM pathology and to what extent the whole muscle transcriptome is restored to normal after gene transfer. Herein, RNA-sequencing was used to examine the transcriptomes of the *Biceps femoris* and *Vastus lateralis* in a previously described canine cohort that showed dose-dependent clinical improvements after rAAV8-cMTM1 gene transfer. Our analysis confirmed several dysregulated genes previously observed in XLMTM mice but also identified transcripts linked to XLMTM pathology. We demonstrated XLMTM transcriptome remodeling and dose-dependent normalization of gene expression after gene transfer and created metrics to pinpoint potential biomarkers of disease progression and correction.**

## INTRODUCTION

The last 30 years have seen the field of neuromuscular disease (NMD) genetics grow from one known gene for Duchenne muscular dystrophy (DMD) in 1987 to hundreds of disease genes identified today. NMDs are complex diseases whose pathological processes are often not entirely understood. Gene therapy offers a unique treatment approach for single-gene NMDs, because fixing the root cause of the defect does not necessarily require a comprehensive understanding of the pathophysiology. However, successful gene therapy provides an extraordinary opportunity to delve more deeply into the complex molecular underpinnings of disease initiation, progression, and correction.

In the past several years, treatment breakthroughs have been made in small and large animal models of NMDs,<sup>1–7</sup> while clinical benefits have been reported after a single injection of recombinant adeno-associated virus (rAAV) in patients with spinal muscular atrophy.<sup>8</sup> In most of these studies, results consisted of correlations between transgene expression levels and clinical outcome measures. However, this level of insight may prove insufficient when sub-therapeutic effects are the outcome or, conversely, when adverse events occur *in vivo*,<sup>9–11</sup> a limitation that strongly argues for a deeper understanding of disease mechanisms. Therefore, the identification of disease-associated gene dysregulation and signaling pathways that are not—or only partially—corrected after gene transfer is of considerable interest. Also, as more gene therapies are approved for NMDs, it will become increasingly important to track their long-term durability using non-invasive biomarkers that appear prior to clinical deterioration.

Recent advances in -omics technologies have provided valuable tools for the diagnosis of NMDs and for the understanding of disease mechanisms at the molecular level.<sup>12–16</sup> In this study, we investigated the underlying mechanisms of rAAV-mediated correction of muscle pathology utilizing the canine model of X-linked myotubular myopathy (XLMTM). XLMTM is a centronuclear myopathy caused by mutations in the *MTM1* gene, which encodes the myotubularin protein.<sup>17</sup> Patients exhibit severe muscle weakness, breathing difficulties,

Received 12 January 2019; accepted 31 October 2019;  
<https://doi.org/10.1016/j.ymthe.2019.10.018>.

<sup>7</sup>Present address: Clinical NGS Group, Thermo Fisher Scientific, South San Francisco, CA 94080, USA.

<sup>8</sup>Present address: Exonics Therapeutics, Watertown, MA 02472, USA.

<sup>9</sup>Present address: AskBio, Chapel Hill, NC 27514, USA.

**Correspondence:** David L. Mack, Department of Rehabilitation Medicine, Institute for Stem Cell and Regenerative Medicine, University of Washington, Seattle, WA 98109, USA.

**E-mail:** [dmack21@uw.edu](mailto:dmack21@uw.edu)

and a high mortality rate in the first years of life.<sup>18,19</sup> XLMTM muscle cells have smaller diameters, an abnormal architecture, and poor excitation-contraction coupling (ECC).<sup>20–23</sup> At the molecular level, myotubularin is involved in phospholipid metabolism, and its absence leads to structural and functional defects in key membrane compartments such as the sarcoplasmic reticulum, the T-tubule network, and the neuromuscular junction.<sup>20,24–27</sup> In addition, the insulin-like growth factor 1 (IGF1) and downstream signaling pathways (Akt, mTOR, autophagy, ubiquitin-proteasome) are dysregulated, which correlates with marked muscle hypotrophy.<sup>28–31</sup> During the past decade, the use of rAAV vectors in XLMTM mice and dogs demonstrated remarkable therapeutic efficacy, paving the way for a recently initiated clinical trial,<sup>3,5,24,32</sup> (ClinicalTrials.gov: NCT03199469). Treated XLMTM dogs showed dose-dependent correction of multiple disease phenotypes, resulting in improved muscle function and survival up to 4 years of age.<sup>5,33</sup> Here, we explored the transcriptional changes driving this correction of muscle morphology and function in treated XLMTM dogs using an unbiased, comprehensive RNA-sequencing (RNA-seq) approach. Untreated XLMTM dogs exhibited transcriptional changes consistent with well-described disease phenotypes, and several genes emerged as potential candidates to explain disease development and progression. Importantly, rAAV gene therapy leads to a dose-dependent restoration of the muscle transcriptome toward a more normal profile. We also present an array of metrics based on RNA-seq data to quantify gene therapy efficacy and distinguish the transcripts corrected to normal after treatment from those escaping correction. Finally, we highlight potential RNA biomarkers to monitor and predict the efficacy of current and future gene therapy protocols.

## RESULTS

### Unsupervised Analysis Discriminates XLMTM Dogs According to Treatment Groups

Muscle samples for the RNA-seq analysis herein were obtained from a previous study<sup>5</sup> in which XLMTM dogs were randomized to receive one of three increasing doses of rAAV8-*cMTM1* or saline as a negative control. Groups were named AAVLow (0.3E+14 vector genomes [vg]/kg), AAVMid (2.0E+14 vg/kg), AAVHigh (5.0E+14 vg/kg), and XLMTM, respectively, and were compared to wild-type (WT) controls (Figure 1A). The AAVMid and AAVHigh doses were characterized as therapeutic with full correction of disease phenotypes such as survival, neurological scores, and muscular and respiratory functions (Figure 1B).<sup>5</sup> Conversely, the AAVLow dose resulted in sub-therapeutic clinical outcomes, including significant weakness, significant muscle pathology, and death of two animals. In this *a posteriori* study, the transcriptome of these dogs was analyzed using RNA-seq on two muscles of the hindlimb: *Biceps femoris* and *Vastus lateralis*. Due to premature death encountered in the XLMTM and AAVLow groups, dogs were not age matched, but samples were all collected at necropsy to reflect the final extent of disease progression or correction (Table S1). In each muscle, the top 500 most informative genes were selected based on their expression variance across samples and were used for principal component analysis (PCA). It showed segregation of the 13 dogs in 2 groups (Figures 1C and 1D): AAVLow and XLMTM dogs in

one group; WT and AAVHigh dogs in the other. The AAVMid group also clustered with WT and AAVHigh dogs in the *Vastus* and was spread between the two groups in the *Biceps*. Gene ontology analysis was performed on the top 500 genes in each muscle and identified multiple terms related to muscle biology, particularly in the *Vastus* (Figure S1).

### rAAV Gene Therapy Remodels the XLMTM Transcriptome in a Dose-Dependent Manner

To gain further insight into the development of XLMTM disease phenotypes in these two muscles, and their correction by gene therapy, we determined the differentially expressed (DE) genes between XLMTM dogs and WT controls using the edgeR package.<sup>34</sup> In the *Biceps* and the *Vastus*, 824 and 1,122 DE genes were obtained, respectively. Among them, 400 were identified in both muscles, suggesting overlap in XLMTM disease processes between different muscles. Gene ontology analysis of the 400 common DE genes pointed to muscle development, muscle contraction, and various metabolic responses (Figure 2A). Of note, individual gene deregulations previously identified in XLMTM mice or in human patients were confirmed in the dog model. For instance, three acetylcholine receptor subunits were overexpressed in both muscles of XLMTM dogs: *CHRNA1*, *CHRND*, and *CHRNA3*<sup>26,35,36</sup> (Figure S2). Ryanodine receptor 1 (*RYR1*) and dihydropyridine receptor (*CACNA1S*) transcript levels were also both upregulated in XLMTM patient cells *in vitro*,<sup>37</sup> and this result was confirmed in our datasets, although not significantly. Finally, the growth differentiation factor 8 (myostatin, *MSTN*) and its antagonist follistatin (*FST*) were also respectively down- and upregulated, similar to what was recently observed in *Mtm1*-knockout (KO) mice<sup>36,38</sup> (Figure S2). Together, these data suggest an overlap between the transcriptome dysregulation induced by XLMTM in different species. The lists of DE genes in both *Biceps* and *Vastus* are available in Tables S2 and S3. Importantly, the expression profiles of the three *CHRN* genes, *MSTN*, and *FST*, were verified by qPCR, and comparison between the different groups of dogs showed a trend almost identical to the RNA-seq data (Figure S3). To visualize the extent of XLMTM transcriptome remodeling achieved by the three injected rAAV doses, we plotted the entire set of DE transcripts from both muscles of XLMTM untreated dogs and all three treatment groups relative to WT control dogs (log fold-change values, log FC) (Figures 2B and 2C). This plot showed that both upregulated and downregulated DE genes (in green and blue, respectively) were corrected, with log FC values progressively returning to zero. The log FC interquartile (IQ) range was then calculated to quantify transcriptome remodeling. This number represents the length of the interval comprising the central half (25%–75%) of ranked log FC values. Therefore, it estimates how the expression values of the DE gene set diverge from WT controls. In the *Biceps*, log FC IQ range values varied from 3.0 to 2.8, 1.3, and 0.91 in untreated XLMTM, AAVLow, AAVMid, and AAVHigh dogs, respectively (Figure 2B). In the *Vastus*, AAVMid dogs had a lower IQ range than AAVHigh dogs, reflecting a higher transcriptome remodeling effect with the intermediate rAAV dose (XLMTM, 2.7; AAVLow, 2.1; AAVMid, 0.81; and AAVHigh, 1.3; Figure 2C). Hierarchical clustering using the common

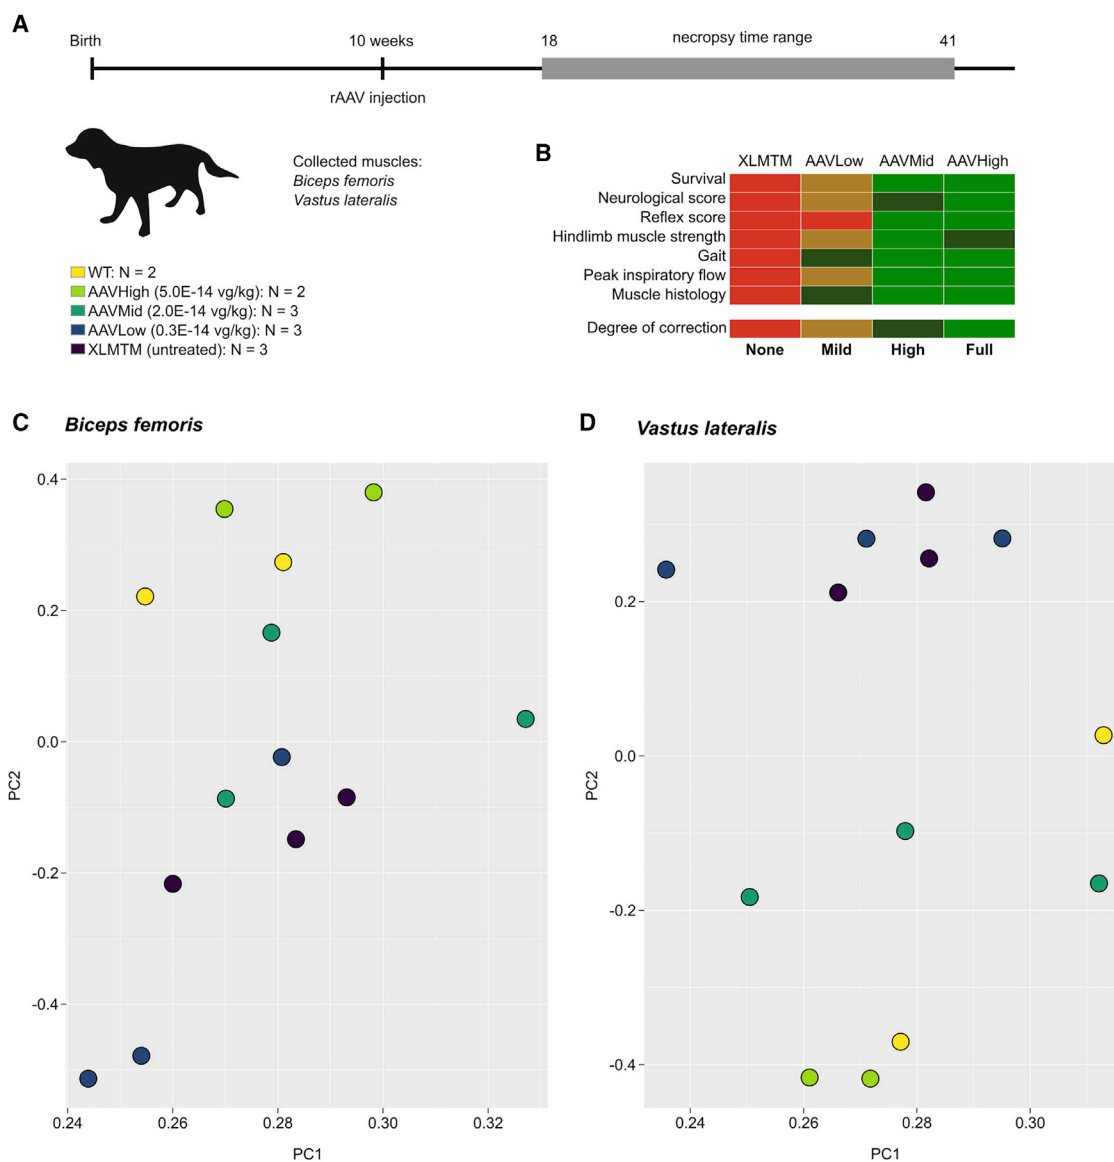

**Figure 1. Visualization of Gene Therapy Efficacy by Transcriptome Profiling in XLMTM Dogs**

(A) Experimental timeline in weeks and details of the 5 groups of dogs. The rAAV vector was injected at 10 weeks of age, and dogs were monitored until the age of 39 to 41 weeks, unless euthanasia criteria were reached prematurely, as encountered in untreated XLMTM and AAVLow dogs. Additional details are provided in Table 1. (B) Heatmap representing the degree of corrections of key XLMTM phenotypes achieved in the three groups of dogs, as measured in our previous study.<sup>5</sup> (C) Principal component analysis (PCA) on RNA-seq data in the *Biceps femoris* after selection of the top 500 most informative genes across samples. (D) PCA on RNA-seq data in the *Vastus lateralis* after selection of the top 500 most informative genes across samples. For (C) and (D), PC1 and PC2 were projected in a two-dimensional plot, with each dog represented as a color-coded dot.

DE genes distinguished therapeutic (AAVMid and AAVHigh) and sub-therapeutic (AAVLow) doses (Figure 2D). The only exception was observed between dog 04 (AAVMid) and dog 13 (AAVLow) *Biceps* samples, which clustered with the sub-therapeutic and therapeutic groups, respectively. Interestingly, disease correction in dog 13 (SSAN\_18) was more pronounced than in the two other AAVLow dogs, and it did not reach euthanasia criteria before the end of the study period (Table S1).<sup>5</sup> *MTM1* transgene expression was then

measured directly from RNA-seq data using a custom-made workflow for rAAV-derived mRNA tag counting and showed that transgene expression strongly correlated with the extent of transcriptome correction (Figure 2D). Transgene expression level in dog 13 *Biceps* was comparable to that of AAVMid dogs (*MTM1* tag count = 1.3 versus a median of 1.2 in AAVMid dogs), suggesting that evaluation of transgene expression directly from RNA-seq data is a better predictor of transcriptome remodeling than the injected dose of gene

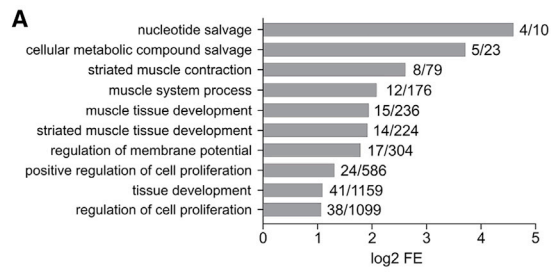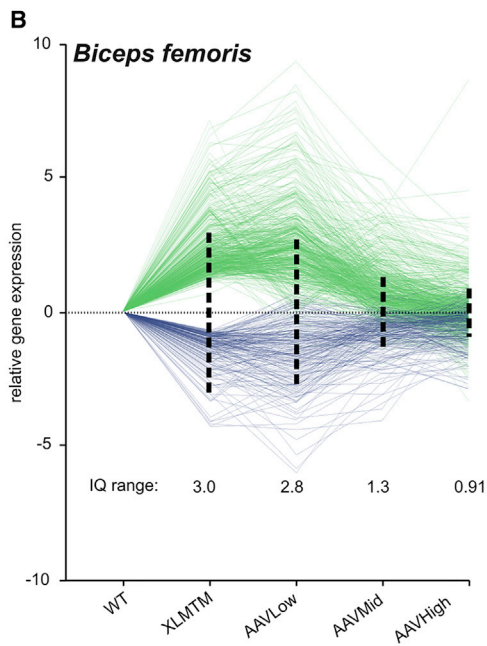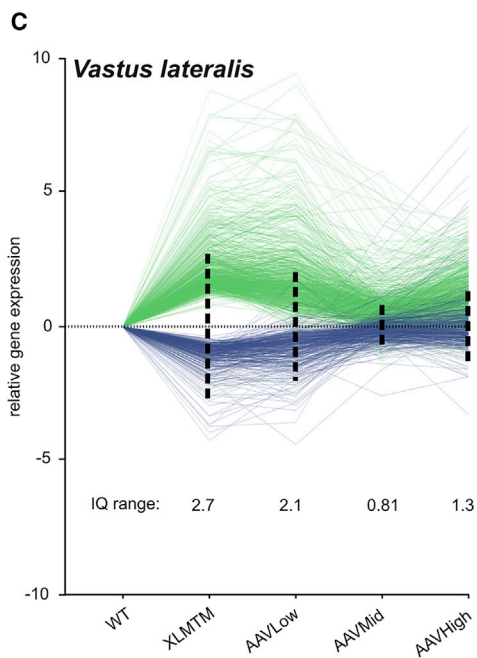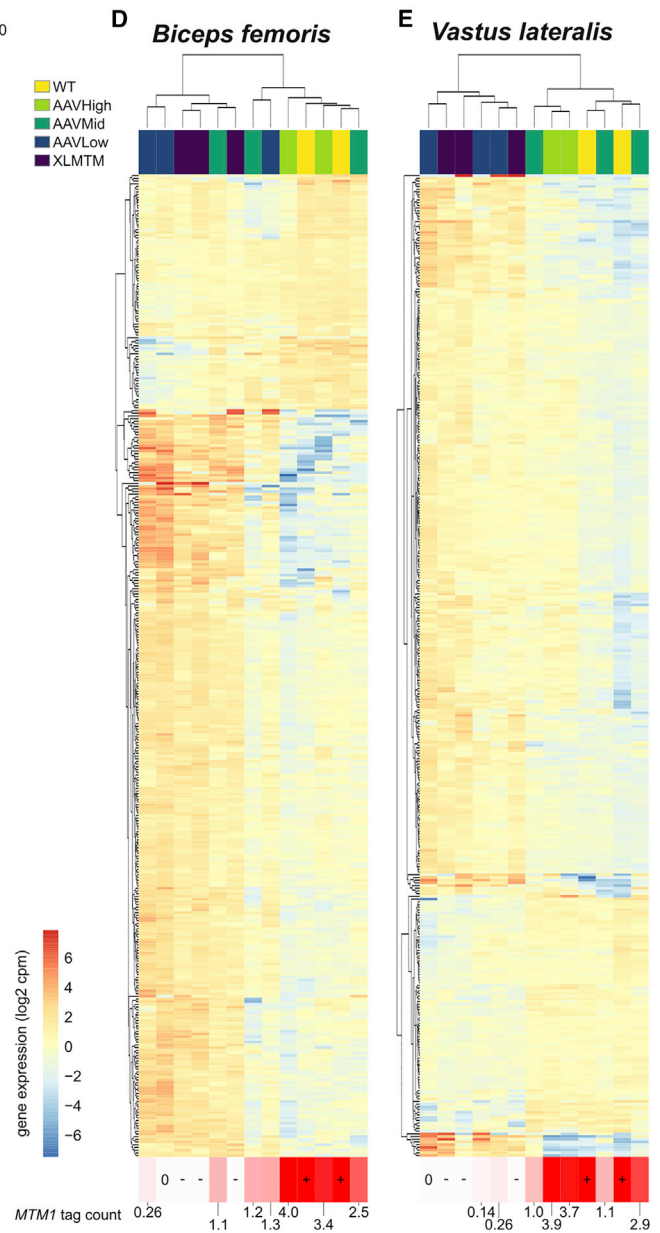

(legend on next page)



therapy vector and that it reflects itself on overall treatment outcome. Therefore, injected *Biceps* samples were re-ordered in two distinct groups: the *Therapeutic* group with the two AAVHigh dogs, two AAVMid dogs, and dog 13; and the *Sub-therapeutic* group, with the two remaining AAVLow dogs, and dog 04. In the *Vastus*, all AAVMid and AAVHigh clustered together with WT controls and formed the *Therapeutic* group, while AAVLow dogs formed the *Sub-therapeutic* group.

### RNA-Seq Allows the Creation of Molecular Metrics of Gene Therapy Efficiency

Because distinct sub-populations of transcripts may respond differently to gene therapy, an array of metrics was created, based on the type of transcriptome remodeling effect. *Rescued* genes were defined as the XLMTM-associated DE genes that were no longer significantly different from WT controls in rAAV-treated dogs (Figure 3A). Conversely, *Resistant* genes were still differentially expressed between rAAV-treated dogs and WT controls. Two additional sub-populations of *Partially Rescued* and *Worsened* genes were also defined but were both marginally represented irrespective of the vector dose. These metrics were determined for the *Sub-therapeutic* and *Therapeutic* groups of dogs, in the *Biceps* and the *Vastus* muscles (Figures 3B and 3C). As anticipated, a sub-therapeutic effect was associated with only 6.1% and 7.5% of genes with a *Rescued* expression profile in the *Biceps* and *Vastus* muscles, respectively, while *Resistant* genes accounted for 64% and 57%. In sharp contrast, the proportion of *Rescued* genes reached 52.1% and 42.7% in the *Biceps* and *Vastus* of the dogs showing therapeutic benefits (Figures 3B and 3C). This indicates that an increase in *MTM1* transgene expression drives a more profound restoration of the muscle transcriptome, providing for the first time a comprehensive transcriptomic explanation of physiological and histological outcome measures observed previously.<sup>5</sup>

### Differential Treatment Outcome Leads to Identification of Disease Biomarkers

Next, populations of *Candidate Biomarkers* of XLMTM correction were defined as the genes presenting a *Rescued* expression profile in the *Therapeutic*, but not in the *Sub-therapeutic* group of dogs (Figures 4A and 4B). This resulted in more than 400 genes in each muscle, 120 of which were detected in both *Biceps* and *Vastus*. As expected, the expression pattern of these 120 genes followed a similar trend, with sustained deregulation in the XLMTM and *Sub-therapeutic* groups, and a marked rescue in the *Therapeutic* group (Figures 4C and

4D). In the latter, IQ range values were only 0.45 and 0.61 in the *Biceps* and the *Vastus*, respectively. Finally, a list of 12 candidate biomarkers was isolated among the genes with the most significant expression changes in the two XLMTM muscles ( $p$  value  $< 0.001$  in each muscle; Figure 4E) and their expression level was correlated with *MTM1* tag counts in injected dogs and untreated controls (tag counts = 0, by definition). The most significant correlation was obtained for *APEX2*, an endonuclease involved in base-excision repair and progression through the cell cycle (correlation coefficient  $\rho = -0.86$ ,  $p$  value =  $2.3E-7$ ). Interestingly, this list also contained *ALAS2* ( $r = -0.83$ ,  $p$  value =  $1.3E-6$ ) and *PIK3R2* ( $r = -0.82$ ,  $p$  value =  $3.3E-6$ ), two genes that were recently associated with muscle strength,<sup>39</sup> and *NRK* ( $r = -0.82$ ,  $p$  value =  $3.8E-6$ ), known to be specifically expressed during myotome formation and early muscle development in mice, but not in the adult.<sup>40</sup> The expression of these 4 genes in injected dogs was inversely correlated with *MTM1* transgene expression. *Candidate Biomarkers* also included *RINI1*, *EFCAB7*, *ANGPTL2*, *CHRNA1*, *PROCR*, *IGF2*, *ETS2*, and *RIMS3* (Figure 4F). Interestingly, two of these genes are known to be secreted in the serum: *IGF2* and *ANGPTL2*. Their expression was validated on independent biopsies by qPCR, which resulted in typical “biomarker” expression profiles (Figures 4G and 4H). The full lists of *Rescued* genes in both muscles and of *Candidate Biomarkers* are available in Tables S4 and S5.

### DISCUSSION

With the recent success of preclinical and clinical trials using rAAV vectors, understanding the exact processes by which disease phenotypes are impacted—and eventually rescued—by gene therapy is of considerable interest for the field of molecular medicine. Here, we take advantage of the unprecedented therapeutic efficacy obtained in XLMTM dogs to investigate the molecular mechanisms of NMD correction, with a focus on pathological muscle transcriptome. Overall, our study demonstrates that corrective rAAV gene therapy induces a dose-dependent transcriptome remodeling, which was highly correlated with RNA-seq-based transgene expression measurements. These measures were comparable with our previous study despite being obtained by different techniques on distinct muscle biopsies<sup>5</sup> and revealed high levels of recombinant *MTM1* transcript in the dogs presenting with full disease correction.

For logistical and ethical considerations, it was decided to include both hemizygous *MTM1*<sup>-y</sup> male and homozygous *MTM1*<sup>-/-</sup>

### Figure 2. Remodeling of the XLMTM Transcriptome by rAAV Gene Therapy

(A) Gene ontology analysis on the differentially expressed genes common to XLMTM *Biceps* and *Vastus* muscles. For each represented term, the log<sub>2</sub> fold enrichment (FE) values are graphically represented, together with the  $x/y$  ratio, defined as the number of genes participating to this enrichment ( $x$ ) over the total number of genes affiliated with the corresponding ontology ( $y$ ). (B) Relative expression of the differentially expressed genes in the *Biceps*, expressed in log fold change (log FC) after normalization with healthy controls. The interquartile ranges were determined from positive log FC values (negative log FC were converted into absolute values) and represented as dashed vertical lines pointing in both directions around the  $y = 0$  line. (C) Similar representation for the differentially expressed genes detected in the *Vastus* muscle. (D and E) Hierarchical clustering generated from log cpm values of the 400 common differentially expressed genes for the *Biceps* (D) and the *Vastus* (E). Each column represents one muscle sample, color-coded for treatment group; each row represents one individual gene, color coded for its expression level (log cpm). RNA-seq-based *MTM1* mRNA tag counts are indicated under each column.

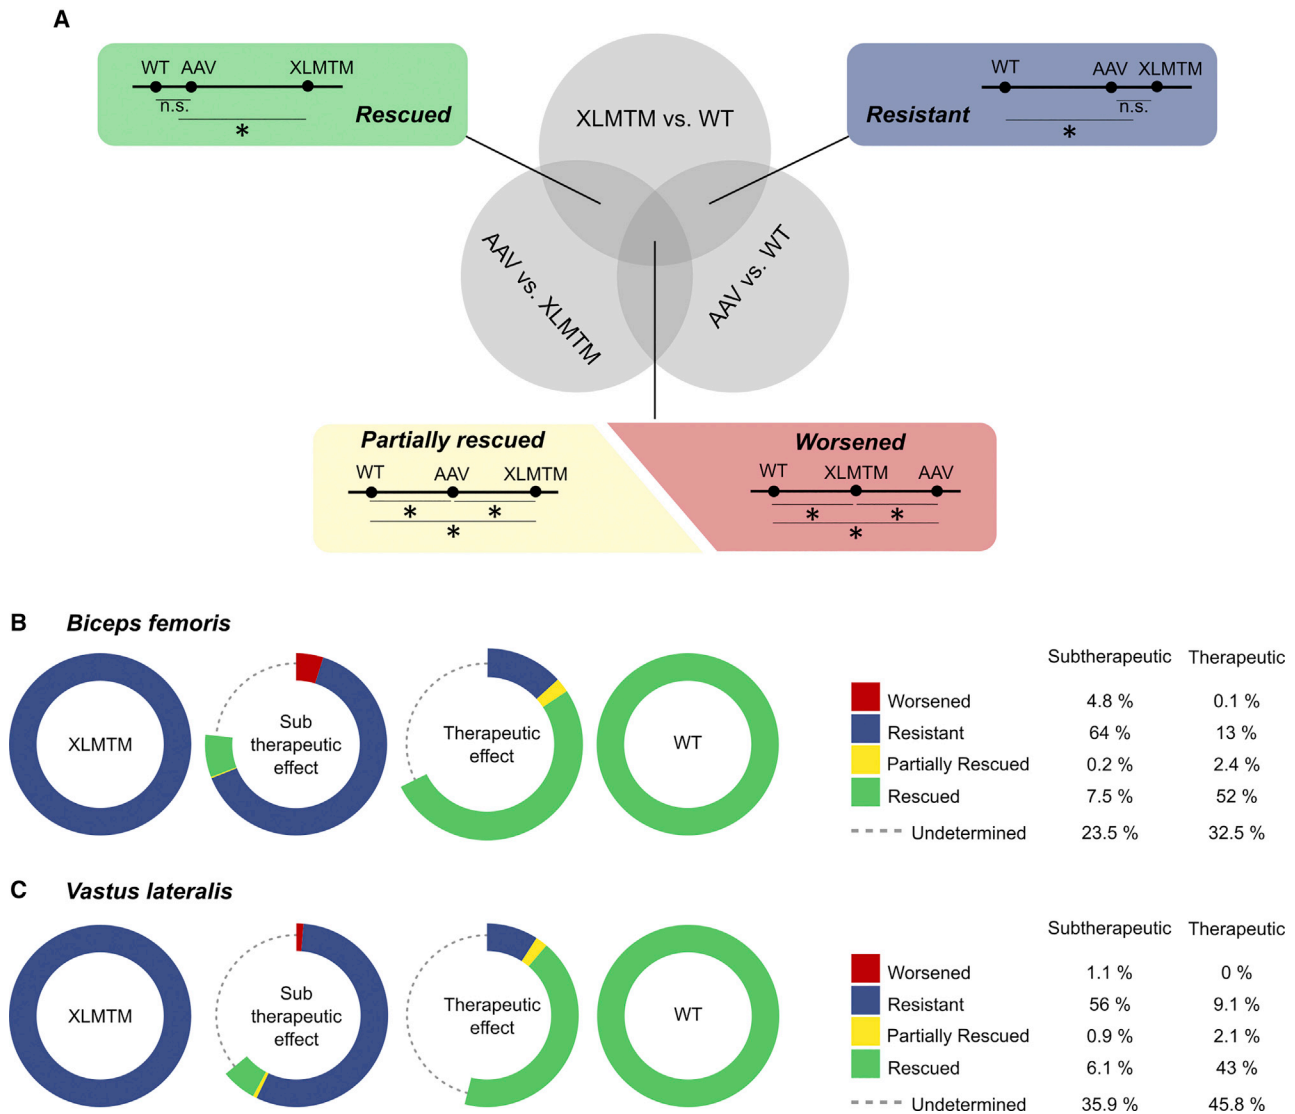

**Figure 3. Quantifiers of Transcriptome Remodeling and Gene Therapy Efficacy in XLMTM Dogs**

(A) Venn diagram representing the intersections of differentially expressed gene populations obtained after comparison of untreated XLMTM, rAAV-treated XLMTM, and healthy dogs. Focus is made on the *Rescued* and the *Resistant* two-circle domains in specific insets and on the central domain containing *Partially Rescued* and *Worsened* genes. Exemplar gene-expression levels are plotted on a line for the three groups: healthy, XLMTM, and rAAV-treated (AAV) dogs. n.s., non-significant gene expression difference; \*, significant difference. (B and C) Evolution of the described metrics in the *Sub-therapeutic* and the *Therapeutic* groups of dogs—as defined in the text—in the *Biceps* (B) and the *Vastus* (C) muscles. The initial DE gene set in XLMTM dogs is represented as a blue ring, and its counterpart in healthy controls as a green ring. In rAAV-treated dogs, the areas corresponding to the above-described metrics have an arc length directly proportional to the proportion of initial DE genes presenting the corresponding expression profile.

female dogs in the study, since they both present comparable XLMTM phenotypes. Dog randomization into the different treatment groups led to uneven distribution of females in the untreated XLMTM and AAVLow groups, and therefore, sex-related differences cannot be entirely ruled out in this study.<sup>5</sup> Nonetheless, unsupervised analyses have clearly demonstrated that the overall variability was driven by transgene expression, which can distinguish dogs showing therapeutic versus subtherapeutic responses to rAAV treatment.

To our knowledge, this study is one of the first to report a comprehensive transcriptome profile from myotubularin-deficient muscles, and the first in a large animal model. Previously, individual genes were queried in *Mtm1*-deficient mice as an attempt to explain clinical observations.<sup>26,29,38</sup> In addition, muscle biopsies from 8 XLMTM patients have been analyzed for the expression of 4,200 genes using microarray and pointed to the upregulation of genes coding for cytoskeletal and extracellular matrix proteins.<sup>35</sup> More recently, a publication used RNA-seq in *Mtm1δ4* mice treated or not with tamoxifen,

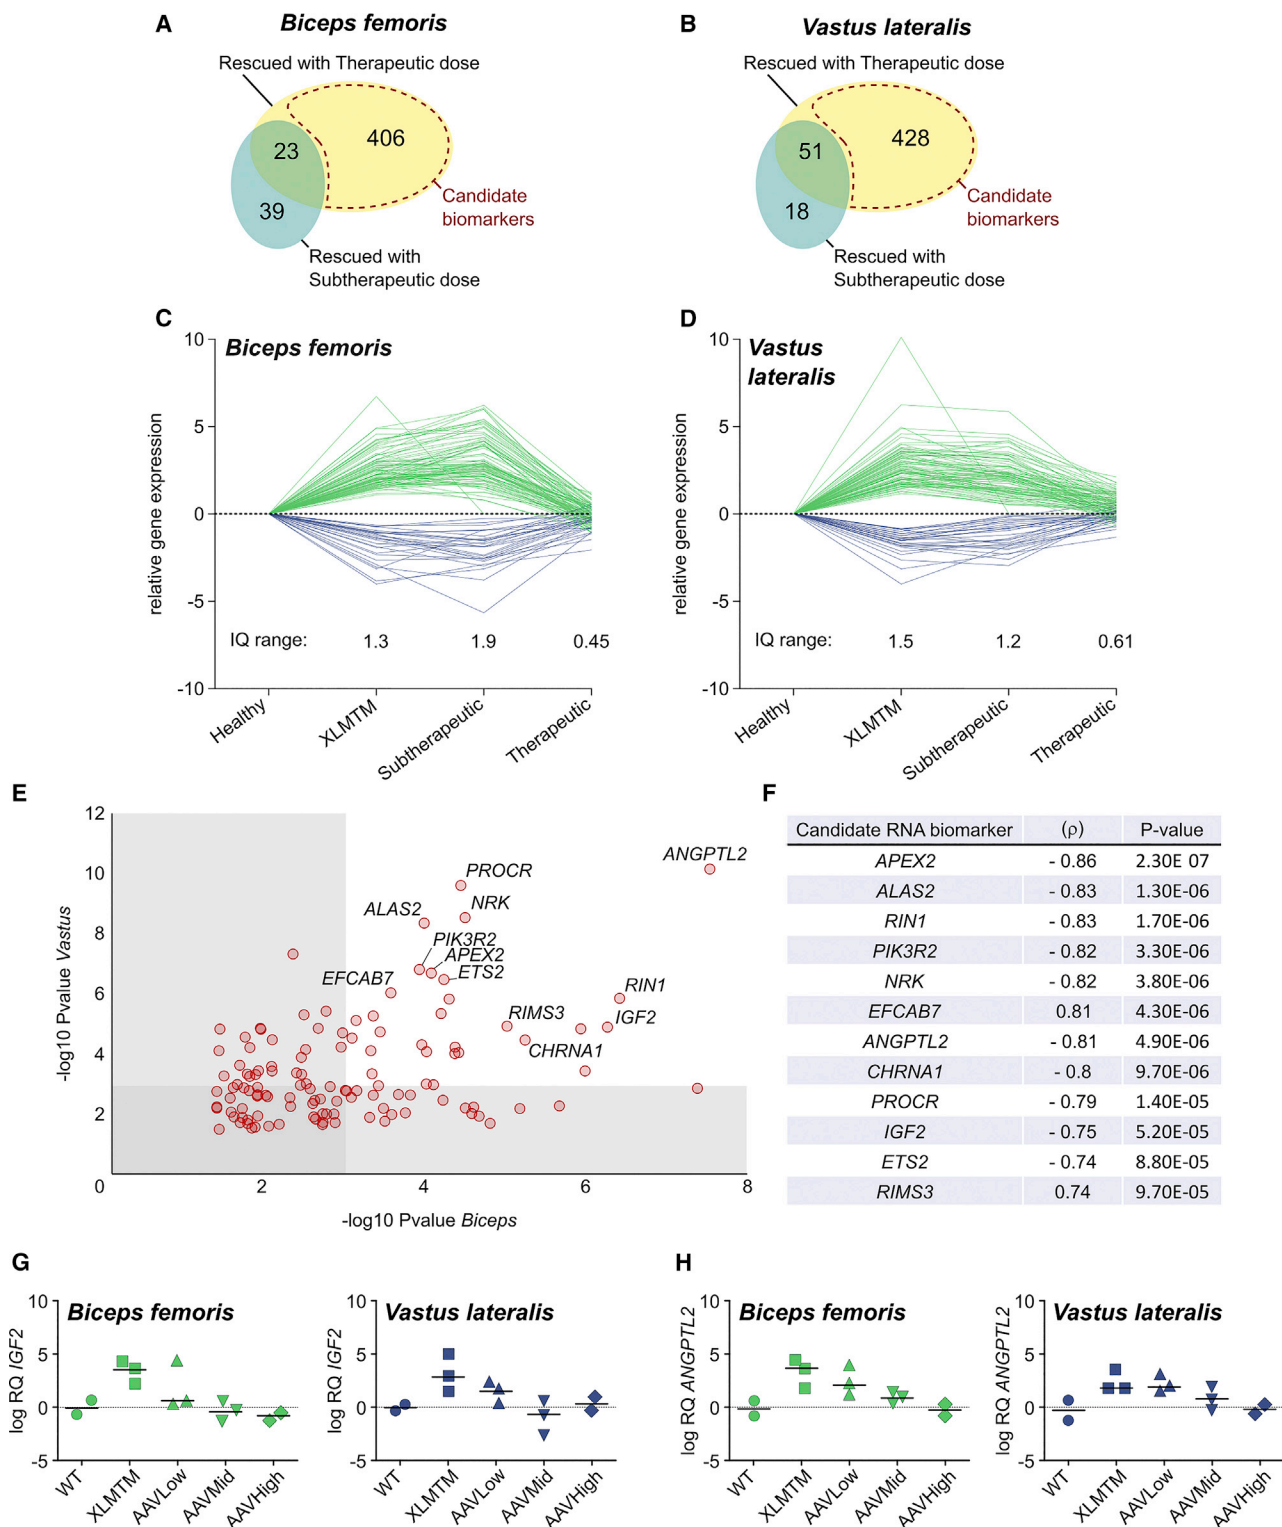

**Figure 4. Candidate RNA Biomarkers of AAV Therapeutic Effect in XLMTM Dogs**

(A and B) Venn diagrams showing the number of genes with a *Rescued* profile and their overlap between the *Sub-therapeutic* and the *Therapeutic* groups. The *Candidate Biomarker* gene subsets are delineated with a dashed red area, respectively in the *Biceps* (A) and the *Vastus* (B). (C) Relative expression of the candidate biomarkers in the (legend continued on next page)

and highlighted a set of 849 differentially expressed genes between untreated *Mtm1δ4* mice and WT controls.<sup>36</sup> In our study, we gathered data on more than 32,000 dog genes, some of them not yet characterized. Importantly, several genes previously identified as differentially expressed in XLMTM patients and mice were also detected in dogs. In comparison with the mouse transcriptome,<sup>36</sup> we found an overlap of 87 deregulated ortholog genes in our XLMTM dogs, and ranking of log FC values showed a high correlation between the two species ( $\rho = 0.6$ ,  $p = 1.1E-9$ ) (Table S6).

Among the overlap, we notably found three subunits of the nicotinic acetylcholine receptor: *CHRNA1*, *CHRNA3*, and *CHRNA5*, whose deregulation might be related to the compromised ability of XLMTM muscle cells to generate  $Ca^{2+}$  transients in response to electrical stimulation.<sup>20,21</sup> In this regard, genes coding for *RYR1* and *CACNA1S* are upregulated in XLMTM patients' cells,<sup>37</sup> and were also slightly overexpressed in XLMTM dogs, although no significant differences were measured (Figure S2). Interestingly, XLMTM dogs also showed deregulation of multiple additional genes coding for ion transporters that could also lead to ECC defects, including sodium (*SCN4B*, *SCN5A*, *SCNN1A*) and potassium (*KCNK17*, *KCNQ5*) channels, the sodium/potassium-transporting ATPase subunit alpha-3 (*ATP1A3*), and members of the solute carrier (SLC) family.

Another major consequence of myotubularin deficiency is an early muscle hypotrophy observed in patients and animal models.<sup>22,23,32,41-43</sup> XLMTM myotubes have a small diameter and centrally positioned nuclei, and they are often considered abnormally developed or unable to maintain a fully differentiated state. In XLMTM mice, these characteristics correlate with dysregulated PI3K/Akt/mTOR signaling and abnormal autophagy.<sup>29,30,44,45</sup> More recently, another study reported the downregulation of the myostatin pathway in *Mtm1*-KO mice, which could be a compensatory mechanism to counter muscle hypotrophy.<sup>38</sup> Herein, the genes coding for myostatin (*MSTN*) and follistatin (*FST*) were down- and upregulated, respectively, in XLMTM dogs. These outcomes confirmed the involvement of this pathway downstream of myotubularin deficiency (Figure S2), and the potential of myostatin as a therapeutic target. Indeed, treatment with ActRIIB-mFc, a myostatin inhibitor, resulted in muscle hypertrophy and increased lifespan in XLMTM mice.<sup>46</sup> More recently, these mice were co-injected with an rAAV vector coding for an inhibitory myostatin propeptide in addition to rAAV-*Mtm1*, and this led to a greater increase in muscle mass than mice treated with rAAV-*Mtm1* only.<sup>38</sup> This finding demonstrates that the tools created in our study have the potential to identify relevant targets for combinatorial gene therapy applications.

In light of our RNA-seq data, abnormal muscle development appears as an important component of XLMTM biology in dogs. The genes encoding the myogenic regulators MyoD (*MYOD1*) and myogenin (*MYOG*) are overexpressed in XLMTM dogs, together with *PAX7*, a marker of adult muscle stem (satellite) cells (Tables S2 and S3). In addition, several genes coding for isoforms of structural proteins transiently expressed during skeletal muscle embryonic development were found upregulated, including the acetylcholine receptor  $\gamma$  subunit (*CHRNA3*) and myosin heavy chain 3 (*MYH3*) in the *Biceps*, or cardiac alpha-actin (*ACTC1*) and troponin T (*TNNI3*) in the *Vastus*. Of note, XLMTM dogs reached euthanasia criteria prematurely and their median age at necropsy was 22 weeks, as opposed to 39 weeks in WT dogs. At this age, muscles are expected to be in their terminally differentiated state, as seen by histological examination. However, subtle differences in their transcriptome cannot be ruled out and might confound the expression of developmental genes. Overall, transcriptome profiling of canine XLMTM muscles not only confirmed gene-expression data in mice and human patients, but also helped identify multiple genes not previously associated with XLMTM biology, and whose deregulation provides insight into disease phenotypes.

Gene therapy studies rarely investigate the molecular consequences of target cell transduction. With rAAV vectors injected in new patients every year, now including boys suffering from XLMTM (clinical trial NCT03199469), a better understanding of the molecular mechanisms by which NMDs are corrected will become crucial. Recently, one study reported the normalization of microarray gene expression data after dual rAAV gene therapy in a mouse model of oculopharyngeal muscular dystrophy (OPMD).<sup>6</sup> Concerning XLMTM, tamoxifen-treated *Mtm1δ4* mice only showed 29 differentially expressed genes compared to untreated controls,<sup>36</sup> but these data were obtained at an earlier time after treatment compared to our study. In these two publications,<sup>6,36</sup> the authors did not focus on specific genes or gene sub-populations. Herein, we provide for the first time a comprehensive picture of muscle transcriptome remodeling after rAAV gene therapy using RNA-seq. We used hierarchical clustering to group injected dogs based on the extent of transcriptome remodeling rather than on the dose of rAAV injected *in vivo*. In agreement with previous clinical observations,<sup>5</sup> this clustering approach resulted in a *Sub-therapeutic* and a *Therapeutic* group of dogs. Strikingly, the *Biceps* sample collected from dog 13 was part of the *Therapeutic* group despite a treatment with an otherwise sub-therapeutic dose of vector. However, inclusion in the *Therapeutic* group correlated with the extended lifespan and phenotypic improvements observed in this specific dog.<sup>5</sup> To illustrate different facets of transcriptome remodeling, we created several metrics and

*Biceps* (C) and the *Vastus* (D), expressed in log FC after normalization with healthy controls. The interquartile ranges were determined from positive log FC values (negative log FC were converted into absolute values). (E) Two-dimensional dot-plot of the 120 candidate biomarkers common to the *Biceps* and *Vastus* muscles, representing the significance of the differential expression between XLMTM dogs and healthy controls ( $p$  values). Each dot represents one gene. (F) Selection of twelve RNA biomarkers of gene therapy efficacy in XLMTM dogs, ranked according to their correlation coefficient ( $\rho$ ) when compared to *MTM1* mRNA tag counts. The significance of this correlation is indicated ( $p$ -value). (G and H) *IGF2* (G) and *ANGPTL2* (H) expression levels in both muscles assessed by qRT-PCR normalized with the housekeeping gene *RPL32* and represented relative to WT dogs; RQ, relative quantity =  $2^{-\Delta\Delta Ct}$ ; log, base 2 logarithm.



determined the proportion of genes whose expression was normalized or not after treatment (Figure 3A). We demonstrated that these metrics can be used to identify dogs exhibiting therapeutic benefits from those in which gene therapy efficacy was not durable. In specific cases, it may also be used to determine transcripts that have been induced by gene therapy treatment as a side effect independent of phenotypic correction. More precisely, this population corresponds to genes that are deregulated in treated dogs but not in their untreated counterparts, when compared to WT controls. Herein, we detected only marginal proportions of genes presenting this expression pattern, which correlates with the absence of adverse events, and of any humoral or cellular immune responses against the transgene product in rAAV-injected dogs.<sup>5</sup> Overall, we obtained confirmation that treatment was well-tolerated at the level of the muscle transcriptome.

Finally, this analytical approach proved very effective to identify RNA biomarkers of XLMTM correction. Interestingly, several of the top 12 candidate genes not only align with XLMTM phenotypes but could also help deepen our understanding of disease development: *ALAS2* and *PIK3R2* have recently been negatively associated with muscle strength in a meta-analysis of more than 7,500 human subjects<sup>39</sup> and were also found overexpressed in XLMTM dogs; Nik-related kinase (NRK) is a protein kinase involved in actin polymerization through phosphorylation and inhibition of cofilin, is only expressed during embryonic myogenesis,<sup>40</sup> and is overexpressed in XLMTM dogs, which adds to the list of dysregulated developmental genes; *APEX2* encodes an endonuclease physically associated with proliferating cell nuclear antigen (PCNA) and driving cell-cycle progression through base-excision repair on the replicative nuclear and mitochondrial DNA.<sup>47,48</sup> *APEX2* is also overexpressed in untreated XLMTM muscles and corrected in the *Therapeutic* group, suggesting that de-regulation/re-regulation of the cell cycle is a key component of disease development and rescue. Altogether our data provide a transcriptional characterization of the structural immaturity encountered in XLMTM muscles.

RNA biomarkers defined in this study could also help identify protein products known to be secreted in the blood and, therefore, would be easily quantifiable. In this regard, at least two genes highlighted in our list could be further investigated at the protein level: angiopoietin-like protein 2 (*ANGPTL2*), an inflammatory mediator participating in blood vessel formation, and insulin-like growth factor 2 (*IGF2*). Recently, increased *ANGPTL2* expression has been reported in a mouse model of denervation-induced muscle atrophy, and when knocked out, improved muscle growth and satellite cell activity.<sup>49</sup> Herein, *ANGPTL2* is overexpressed in untreated XLMTM dogs, and reduced to basal levels in the *Therapeutic* group. Thus, *ANGPTL2* itself might be an important mediator of rAAV-mediated therapeutic benefits. As a proinflammatory cytokine, it is accurately quantifiable in blood samples, and is already used in the context of colorectal cancer.<sup>50</sup> This makes it an excellent candidate biomarker to monitor the evolution of XLMTM after clinical gene therapy.

In conclusion, this study brings evidence of XLMTM rescue by rAAV gene therapy at the molecular level, in the form of a dose-dependent transcriptome remodeling acting on specific aspects of disease biology. Furthermore, it introduces an array of RNA biomarkers in the form of individual genes or carefully defined gene populations, which brings unprecedented insight to the mechanisms of NMD rescue by gene therapy.

## MATERIALS AND METHODS

### Animal Model

The XLMTM Labrador/Beagles used in this study have a p.N155K mutation in the *MTM1* gene and were issued from a colony maintained at the University of Washington.<sup>3,41</sup> More precisely, they were previously included in a gene therapy study, the methods and results of which were extensively described in a recent publication.<sup>5</sup> Animal experimentation was reviewed and supervised by the University of Washington Institutional Review Board. In brief, XLMTM dogs were infused with three increasing doses of a rAAV vector expressing a canine *MTM1* cDNA: 0.3E+14, 2.0E+14, and 5.0E+14 vg/kg at the age of 10 weeks, and sacrificed between 39 and 41 weeks old or when reaching humane euthanasia criteria. In the absence of treatment, XLMTM dogs, both hemizygous males and homozygous females, exhibit progressive clinical deterioration between about 12 and 26 weeks of age, resulting in an inability to stand, walk, and feed. Eight injected dogs were included in this study, together with 3 untreated XLMTM and 2 WT controls, as summarized in Table S1. Necropsy samples were collected from two muscles of the hindlimb to increase statistical power and not restrict the analysis to only one replicate per dog.

### RNA Extraction and Sequencing

Muscle necropsy tissues were frozen on dry ice and stored at  $\leq -60^{\circ}\text{C}$ . RNA extraction, library preparation, and sequencing on an Illumina HiSeq 4000 were conducted by Genewiz (NJ, USA). Specifically, total RNA was extracted with QIAGEN AllPrep mini kit. RNA samples were quantified using a Qubit 2.0 Fluorometer (Life Technologies, Carlsbad, CA, USA) and RNA integrity was checked with an RNA Screen Tape on an Agilent 2200 TapeStation (Agilent Technologies, Palo Alto, CA, USA). RNA sequencing library preparation was prepared with a TruSeq Stranded mRNA Library Prep kit following the manufacturer's protocol (Illumina, category number RS-122-2101). Sequencing libraries were validated using a DNA Analysis Screen Tape on the Agilent 2200 TapeStation (Agilent Technologies, Palo Alto, CA, USA), and quantified by using the Qubit 2.0 Fluorometer (Invitrogen, Carlsbad, CA), as well as by qPCR (Applied Biosystems, Carlsbad, CA, USA). Sequencing libraries were multiplexed and clustered on flow cell using the cBOT from Illumina. After clustering, the flow cell was loaded on the Illumina HiSeq instrument according to manufacturer's instructions. The samples were sequenced using a  $2 \times 150$  Pair-End (PE) High Output configuration. Image analysis and base calling were conducted by the HiSeq Control Software (HCS) on the HiSeq instrument. Raw sequence data (.bcl files) generated from Illumina HiSeq was converted into fastq files and de-multiplexed using Illumina bcl2fastq program version 2.17. One mismatch was allowed for index sequence identification. The 13

**Table 1. Details of the Primers, Probe, and Gene-Expression Arrays Used in the qRT-PCR Validation Experiment**

|                |                                                                                 |                                      |
|----------------|---------------------------------------------------------------------------------|--------------------------------------|
|                | Forward primer                                                                  | 5'-TGGTTACGGGAGCAACAAGAAA-3'         |
|                | Reverse primer                                                                  | 5'-GCACATCAGCAGCACTTCA-3'            |
| <i>RPL32</i>   | Probe                                                                           | 5'-TGCTGCCCACTGGCTTCTGG-3' - VIC-QSY |
| <i>CHRNA1</i>  | Thermo Fisher Scientific – TaqMan Gene Expression - Cf02621957_m1 - FAM/MGB-NFQ |                                      |
| <i>CHRND</i>   | Thermo Fisher Scientific – TaqMan Gene Expression - Cf02691404_m1 - FAM/MGB-NFQ |                                      |
| <i>CHRNA1</i>  | Thermo Fisher Scientific – TaqMan Gene Expression - Cf02704147_m1 - FAM/MGB-NFQ |                                      |
| <i>IGF2</i>    | Thermo Fisher Scientific – TaqMan Gene Expression - Cf02693069_m1 - FAM/MGB-NFQ |                                      |
| <i>FST</i>     | Thermo Fisher Scientific – TaqMan Gene Expression - Cf02645950_m1 - FAM/MGB-NFQ |                                      |
| <i>MSTN</i>    | Thermo Fisher Scientific – TaqMan Gene Expression - Cf02704228_m1 - FAM/MGB-NFQ |                                      |
| <i>ANGPTL2</i> | QIAGEN - qRT-PCR <sup>2</sup> primer assay for dog ANGPTL2 – product 330001     |                                      |

*Vastus*-mRNA-derived libraries were sequenced to an average of 60 M paired-end reads/sample and the 13 *Biceps*-mRNA-derived libraries were sequenced to an average of 20 M paired-end reads/sample.

### RNA Extraction and qRT-PCR

Dog tissues were homogenized using MagNa Pure LC RNA Isolation Tissue Lysis Buffer (Roche) and total RNA was isolated using automated nucleic acid extraction instruments, MagNA Pure 96 System (Cellular RNA Large Volume Kit [Roche]; 350  $\mu$ L sample input, 50  $\mu$ L sample output). RNA was subject to DNase treatment to remove genomic DNA contamination (Ambion, DNA-free DNA Removal Kit, Life Technologies) and reverse transcribed using random hexamers and RevertAid H minus Reverse Transcriptase (Fermentas) (250 ng of total RNA). qPCR was performed in a LightCycler 480 system (Roche) by using 4  $\mu$ L of 1/10 diluted cDNA, SyberGreen mix (Thermo Fisher Scientific) (*ANGPTL2*), Taqman Gene Expression (Thermo Fisher Scientific) (*CHRNA1*, *CHRND*, *CHRNA1*, *IGF2*, *FST*, *MSTN*) and primers (*RPL32*) listed below (Table 1).

### Data Analysis

Initial data analysis, including alignment to reference genome and count table generation, was conducted on the DNAnexus platform (Palo Alto, CA, USA). Specifically, fastq files were first mapped onto the reference genome of *Canis lupus familiaris* (genome assembly: CanFam3.1 [GCA\_000002285.2], downloaded from <https://www.ensembl.org>) using the Subread mapping package<sup>51,52</sup> (settings: subread-align -t 0 -T 4 -d 50 -D 600 -i my\_index -r read1 -S ff -R read2 -o \$output\_name). The resulting bam files were fed into featureCounts<sup>51</sup> package to obtain the count-per-gene table (settings: featureCounts -p -P -d 50 -D 600 -t exon -g gene\_id -a GTF\_file -o \$output\_name bam\_file1 bam\_file2 bam\_file3 bam\_file4 bam\_file5

bam\_file6 bam\_file7 bam\_file8 bam\_file9 bam\_file10 bam\_file11 bam\_file12 bam\_file13). Count tables were further analyzed with the open-source RStudio environment for R (<https://www.r-project.org/>) and the Bioconductor software (<https://www.bioconductor.org/>). The limma<sup>52</sup> and edgeR<sup>34</sup> packages were used to normalize, fit, and compare the data between groups following the analysis pipeline detailed here.<sup>53</sup> Cutoff values for DE gene determination were as follows: p value < 0.05 and fold-change (FC) > 2.0. The code used to analyze count tables is comprehensively detailed in the [Supplemental Information](#). Gene ontology analyses were performed on the GO consortium online platform (<http://geneontology.org/>), using the statistical overrepresentation test and the Bonferroni correction for multiple testing. Enrichments with a corrected p value lower than 0.05 were considered significant.

### Data Representation

Heatmaps and PCA plots were automatically generated in R-Bioconductor. Other data representations were realized on Graphpad PRISM 7 and figures were assembled using the vector graphics Inkscape software. The color palette used in this manuscript to distinguish dog groups was extracted from the viridis package on R-Bioconductor and was carefully selected to be easily interpretable by individuals with colorblindness (<https://cran.r-project.org/web/packages/viridis/vignettes/intro-to-viridis.html>).

### Data Availability

The RNA-sequencing data from this publication have been deposited to the Sequence Read Archive (SRA) database (<https://www.ncbi.nlm.nih.gov/sra>), and assigned the Bioproject ID PRJNA49575. The read files are available at the following link: <https://trace.ncbi.nlm.nih.gov/Traces/sra/sra.cgi?study=SRP165150>.

### SUPPLEMENTAL INFORMATION

Supplemental Information can be found online at <https://doi.org/10.1016/j.ymthe.2019.10.018>.

### AUTHOR CONTRIBUTIONS

J.-B.D. designed and performed the experiments, analyzed the data and wrote the manuscript. J.G. designed the experiments, analyzed the data, and assisted in drafting the manuscript. E.R.-G., K.P., and V.L. performed the experiments and analyzed the data. M.W.L. processed the canine muscle samples and assisted in drafting the manuscript. R.W.G. performed the assessments of muscle force and assisted in drafting the manuscript. J.T.G. designed the experiments and assisted in drafting the manuscript. A.B.-B. provided the gene therapy vector, designed the experiments, and assisted in drafting the manuscript. M.K.C. designed the experiments. D.L.M. designed the experiments, analyzed the data, and wrote the manuscript.

### CONFLICTS OF INTEREST

M.W.L. is a member of advisory boards for Audentes Therapeutics, Solid Biosciences, and Ichorion Therapeutics. He is also a consultant for Wave Life Sciences and Dynacure. A.B.-B. and M.K.C. are inventors of a patent on gene therapy for myotubular myopathy.

## ACKNOWLEDGMENTS

This work was funded by NIH/NIAMS R01-HL115001, the Will Cure Foundation, the Joshua Frase Foundation, the Association Française contre les Myopathies (AFM-Telethon), Myotubular Trust UK, and Audentes Therapeutics, Inc. (San Francisco, CA, USA).

## REFERENCES

- Bengtsson, N.E., Hall, J.K., Odom, G.L., Phelps, M.P., Andrus, C.R., Hawkins, R.D., Hauschka, S.D., Chamberlain, J.R., and Chamberlain, J.S. (2017). Muscle-specific CRISPR/Cas9 dystrophin gene editing ameliorates pathophysiology in a mouse model for Duchenne muscular dystrophy. *Nat. Commun.* 8, 14454.
- Bengtsson, N.E., Hall, J.K., Odom, G.L., Phelps, M.P., Andrus, C.R., Hawkins, R.D., Hauschka, S.D., Chamberlain, J.R., and Chamberlain, J.S. (2017). Corrigendum: Muscle-specific CRISPR/Cas9 dystrophin gene editing ameliorates pathophysiology in a mouse model for Duchenne muscular dystrophy. *Nat. Commun.* 8, 16007.
- Childers, M.K., Joubert, R., Poulard, K., Moal, C., Grange, R.W., Doering, J.A., Lawlor, M.W., Rider, B.E., Jamet, T., Chanièle, N., et al. (2014). Gene therapy prolongs survival and restores function in murine and canine models of myotubular myopathy. *Sci. Transl. Med.* 6, 220ra10.
- Le Guiner, C., Servais, L., Montus, M., Larcher, T., Fraysse, B., Moullec, S., Allais, M., François, V., Dutilleul, M., Malerba, A., et al. (2017). Long-term microdystrophin gene therapy is effective in a canine model of Duchenne muscular dystrophy. *Nat. Commun.* 8, 16105.
- Mack, D.L., Poulard, K., Goddard, M.A., Latournerie, V., Snyder, J.M., Grange, R.W., Elverman, M.R., Denard, J., Veron, P., Buscara, L., et al. (2017). Systemic AAV8-Mediated Gene Therapy Drives Whole-Body Correction of Myotubular Myopathy in Dogs. *Mol. Ther.* 25, 839–854.
- Malerba, A., Klein, P., Bachtarzi, H., Jarmin, S.A., Cordova, G., Ferry, A., Strings, V., Espinoza, M.P., Mamchaoui, K., Blumen, S.C., et al. (2017). PABPN1 gene therapy for oculopharyngeal muscular dystrophy. *Nat. Commun.* 8, 14848.
- Pozsgai, E.R., Griffin, D.A., Heller, K.N., Mendell, J.R., and Rodino-Klapac, L.R. (2017). Systemic AAV-Mediated  $\beta$ -Sarcoglycan Delivery Targeting Cardiac and Skeletal Muscle Ameliorates Histological and Functional Deficits in LGMD2E Mice. *Mol. Ther.* 25, 855–869.
- Mendell, J.R., Al-Zaidy, S., Shell, R., Arnold, W.D., Rodino-Klapac, L.R., Prior, T.W., Lowes, L., Alfano, L., Berry, K., Church, K., et al. (2017). Single-Dose Gene-Replacement Therapy for Spinal Muscular Atrophy. *N. Engl. J. Med.* 377, 1713–1722.
- Gicquel, E., Maizonnier, N., Foltz, S.J., Martin, W.J., Bourg, N., Svinartchouk, F., Charton, K., Beedle, A.M., and Richard, I. (2017). AAV-mediated transfer of FKRP shows therapeutic efficacy in a murine model but requires control of gene expression. *Hum. Mol. Genet.* 26, 1952–1965.
- Mendell, J.R., Campbell, K., Rodino-Klapac, L., Sahenk, Z., Shilling, C., Lewis, S., Bowles, D., Gray, S., Li, C., Galloway, G., et al. (2010). Dystrophin immunity in Duchenne's muscular dystrophy. *N. Engl. J. Med.* 363, 1429–1437.
- Thomsen, G.M., Alkaslasi, M., Vit, J.-P., Lawless, G., Godoy, M., Gowing, G., Shelest, O., and Svendsen, C.N. (2017). Systemic injection of AAV9-GDNF provides modest functional improvements in the SOD1<sup>G93A</sup> ALS rat but has adverse side effects. *Gene Ther.* 24, 245–252.
- Butterfield, R.J., Dunn, D.M., Hu, Y., Johnson, K., Bönnemann, C.G., and Weiss, R.B. (2017). Transcriptome profiling identifies regulators of pathogenesis in collagen VI related muscular dystrophy. *PLoS ONE* 12, e0189664.
- Cummings, B.B., Marshall, J.L., Tukiainen, T., Lek, M., Donkervoort, S., Foley, A.R., Bolduc, V., Waddell, L.B., Sandaradura, S.A., O'Grady, G.L., et al.; Genotype-Tissue Expression Consortium (2017). Improving genetic diagnosis in Mendelian disease with transcriptome sequencing. *Sci. Transl. Med.* 9, eaal5209.
- Gama-Carvalho, M., L Garcia-Vaquero, M., R Pinto, F., Besse, F., Weis, J., Voigt, A., Schulz, J.B., and De Las Rivas, J. (2017). Linking amyotrophic lateral sclerosis and spinal muscular atrophy through RNA-transcriptome homeostasis: a genomics perspective. *J. Neurochem.* 141, 12–30.
- Liang, W.-C., Tian, X., Yuo, C.-Y., Chen, W.-Z., Kan, T.-M., Su, Y.-N., Nishino, I., Wong, L.C., and Jong, Y.J. (2017). Comprehensive target capture/next-generation sequencing as a second-tier diagnostic approach for congenital muscular dystrophy in Taiwan. *PLoS ONE* 12, e0170517.
- Liang, W.-C., Tian, X., Yuo, C.-Y., Chen, W.-Z., Kan, T.-M., Su, Y.-N., Nishino, I., Wong, L.C., and Jong, Y.J. (2017). Correction: Comprehensive target capture/next-generation sequencing as a second-tier diagnostic approach for congenital muscular dystrophy in Taiwan. *PLoS ONE* 12, e0183406.
- Laporte, J., Hu, L.J., Kretz, C., Mandel, J.L., Kioschis, P., Coy, J.F., Klauck, S.M., Poustka, A., and Dahl, N. (1996). A gene mutated in X-linked myotubular myopathy defines a new putative tyrosine phosphatase family conserved in yeast. *Nat. Genet.* 13, 175–182.
- Amburgey, K., Tsuchiya, E., de Chastonay, S., Glueck, M., Alvarez, R., Nguyen, C.-T., Rutkowski, A., Hornyak, J., Beggs, A.H., and Dowling, J.J. (2017). A natural history study of X-linked myotubular myopathy. *Neurology* 89, 1355–1364.
- Beggs, A.H., Byrne, B.J., De Chastonay, S., Haselkorn, T., Hughes, I., James, E.S., Kuntz, N.L., Simon, J., Swanson, L.C., Yang, M.L., et al. (2018). A multicenter, retrospective medical record review of X-linked myotubular myopathy: The recensur study. *Muscle Nerve* 57, 550–560.
- Al-Qusairi, L., Weiss, N., Toussaint, A., Berbey, C., Messaddeq, N., Kretz, C., Sanoudou, D., Beggs, A.H., Allard, B., Mandel, J.L., et al. (2009). T-tubule disorganization and defective excitation-contraction coupling in muscle fibers lacking myotubularin lipid phosphatase. *Proc. Natl. Acad. Sci. USA* 106, 18763–18768.
- Kutchukian, C., Lo Scudato, M., Tourneur, Y., Poulard, K., Vignaud, A., Berthier, C., Allard, B., Lawlor, M.W., Buj-Bello, A., and Jacquemond, V. (2016). Phosphatidylinositol 3-kinase inhibition restores Ca<sup>2+</sup> release defects and prolongs survival in myotubularin-deficient mice. *Proc. Natl. Acad. Sci. USA* 113, 14432–14437.
- Lawlor, M.W., Beggs, A.H., Buj-Bello, A., Childers, M.K., Dowling, J.J., James, E.S., Meng, H., Moore, S.A., Prasad, S., Schoser, B., and Sewry, C.A. (2016). Skeletal Muscle Pathology in X-Linked Myotubular Myopathy: Review With Cross-Species Comparisons. *J. Neuropathol. Exp. Neurol.* 75, 102–110.
- Shichiji, M., Biancalana, V., Fardeau, M., Hogrel, J.-Y., Osawa, M., Laporte, J., and Romero, N.B. (2013). Extensive morphological and immunohistochemical characterization in myotubular myopathy. *Brain Behav.* 3, 476–486.
- Buj-Bello, A., Fougerousse, F., Schwab, Y., Messaddeq, N., Spehner, D., Pierson, C.R., Durand, M., Kretz, C., Danos, O., Douar, A.M., et al. (2008). AAV-mediated intramuscular delivery of myotubularin corrects the myotubular myopathy phenotype in targeted murine muscle and suggests a function in plasma membrane homeostasis. *Hum. Mol. Genet.* 17, 2132–2143.
- Dowling, J.J., Vreede, A.P., Low, S.E., Gibbs, E.M., Kuwada, J.Y., Bonnemann, C.G., and Feldman, E.L. (2009). Loss of myotubularin function results in T-tubule disorganization in zebrafish and human myotubular myopathy. *PLoS Genet.* 5, e1000372.
- Dowling, J.J., Joubert, R., Low, S.E., Durban, A.N., Messaddeq, N., Li, X., Dulin-Smith, A.N., Snyder, A.D., Marshall, M.L., Marshall, J.T., et al. (2012). Myotubular myopathy and the neuromuscular junction: a novel therapeutic approach from mouse models. *Dis. Model. Mech.* 5, 852–859.
- Amoasii, L., Hnia, K., Chicanne, G., Brech, A., Cowling, B.S., Müller, M.M., Schwab, Y., Koebel, P., Ferry, A., Payrastra, B., and Laporte, J. (2013). Myotubularin and PtdIns3P remodel the sarcoplasmic reticulum in muscle in vivo. *J. Cell Sci.* 126, 1806–1819.
- Razidlo, G.L., Katafiasz, D., and Taylor, G.S. (2011). Myotubularin regulates Akt-dependent survival signaling via phosphatidylinositol 3-phosphate. *J. Biol. Chem.* 286, 20005–20019.
- Al-Qusairi, L., Prokic, I., Amoasii, L., Kretz, C., Messaddeq, N., Mandel, J.-L., and Laporte, J. (2013). Lack of myotubularin (MTM1) leads to muscle hypotrophy through unbalanced regulation of the autophagy and ubiquitin-proteasome pathways. *FASEB J.* 27, 3384–3394.
- Fetalvero, K.M., Yu, Y., Goetschkes, M., Liang, G., Valdez, R.A., Gould, T., Triantafellow, E., Bergling, S., Loureiro, J., Eash, J., et al. (2013). Defective autophagy and mTORC1 signaling in myotubularin null mice. *Mol. Cell. Biol.* 33, 98–110.
- Gavriilidis, C., Laredj, L., Solinhac, R., Messaddeq, N., Viaud, J., Laporte, J., Sumara, I., and Hnia, K. (2018). The MTM1-UBQLN2-HSP complex mediates degradation of misfolded intermediate filaments in skeletal muscle. *Nat. Cell Biol.* 20, 198–210.

32. Buj-Bello, A., Laugel, V., Messaddeq, N., Zahreddine, H., Laporte, J., Pellissier, J.-F., and Mandel, J.L. (2002). The lipid phosphatase myotubularin is essential for skeletal muscle maintenance but not for myogenesis in mice. *Proc. Natl. Acad. Sci. USA* 99, 15060–15065.
33. Elverman, M., Goddard, M.A., Mack, D., Snyder, J.M., Lawlor, M.W., Meng, H., Beggs, A.H., Buj-Bello, A., Poulard, K., Marsh, A.P., et al. (2017). Long-term effects of systemic gene therapy in a canine model of myotubular myopathy. *Muscle Nerve* 56, 943–953.
34. Robinson, M.D., McCarthy, D.J., and Smyth, G.K. (2010). edgeR: a Bioconductor package for differential expression analysis of digital gene expression data. *Bioinformatics* 26, 139–140.
35. Noguchi, S., Fujita, M., Murayama, K., Kurokawa, R., and Nishino, I. (2005). Gene expression analyses in X-linked myotubular myopathy. *Neurology* 65, 732–737.
36. Maani, N., Sabha, N., Rezai, K., Ramani, A., Groom, L., Eltayeb, N., Mavandadnejad, F., Pang, A., Russo, G., Brudno, M., et al. (2018). Tamoxifen therapy in a murine model of myotubular myopathy. *Nat. Commun.* 9, 4849.
37. Bachmann, C., Jungbluth, H., Muntoni, F., Manzur, A.Y., Zorzato, F., and Treves, S. (2017). Cellular, biochemical and molecular changes in muscles from patients with X-linked myotubular myopathy due to MTM1 mutations. *Hum. Mol. Genet.* 26, 320–332.
38. Mariot, V., Joubert, R., Hourdé, C., Féasson, L., Hanna, M., Muntoni, F., Maisonobe, T., Servais, L., Bogni, C., Le Panse, R., et al. (2017). Downregulation of myostatin pathway in neuromuscular diseases may explain challenges of anti-myostatin therapeutic approaches. *Nat. Commun.* 8, 1859.
39. Pilling, L.C., Joeannes, R., Kacprowski, T., Peters, M., Jansen, R., Karasik, D., Kiel, D.P., Harries, L.W., Teumer, A., Powell, J., et al. (2016). Gene transcripts associated with muscle strength: a CHARGE meta-analysis of 7,781 persons. *Physiol. Genomics* 48, 1–11.
40. Kanai-Azuma, M., Kanai, Y., Okamoto, M., Hayashi, Y., Yonekawa, H., and Yazaki, K. (1999). Nrk: a murine X-linked NIK (Nck-interacting kinase)-related kinase gene expressed in skeletal muscle. *Mech. Dev.* 89, 155–159.
41. Beggs, A.H., Böhm, J., Snead, E., Kozlowski, M., Maurer, M., Minor, K., Childers, M.K., Taylor, S.M., Hitte, C., Mickelson, J.R., et al. (2010). MTM1 mutation associated with X-linked myotubular myopathy in Labrador Retrievers. *Proc. Natl. Acad. Sci. USA* 107, 14697–14702.
42. Goddard, M.A., Mack, D.L., Czerniecki, S.M., Kelly, V.E., Snyder, J.M., Grange, R.W., Lawlor, M.W., Smith, B.K., Beggs, A.H., and Childers, M.K. (2015). Muscle pathology, limb strength, walking gait, respiratory function and neurological impairment establish disease progression in the p.N155K canine model of X-linked myotubular myopathy. *Ann. Transl. Med.* 3, 262.
43. Pierson, C.R., Dulin-Smith, A.N., Durban, A.N., Marshall, M.L., Marshall, J.T., Snyder, A.D., Naiyer, N., Gladman, J.T., Chandler, D.S., Lawlor, M.W., et al. (2012). Modeling the human MTM1 p.R69C mutation in murine Mtm1 results in exon 4 skipping and a less severe myotubular myopathy phenotype. *Hum. Mol. Genet.* 21, 811–825.
44. Joubert, R., Vignaud, A., Le, M., Moal, C., Messaddeq, N., and Buj-Bello, A. (2013). Site-specific Mtm1 mutagenesis by an AAV-Cre vector reveals that myotubularin is essential in adult muscle. *Hum. Mol. Genet.* 22, 1856–1866.
45. Lawlor, M.W., Viola, M.G., Meng, H., Edelstein, R.V., Liu, F., Yan, K., Luna, E.J., Lerch-Gaggl, A., Hoffmann, R.G., Pierson, C.R., et al. (2014). Differential muscle hypertrophy is associated with satellite cell numbers and Akt pathway activation following activin type IIB receptor inhibition in Mtm1 p.R69C mice. *Am. J. Pathol.* 184, 1831–1842.
46. Lawlor, M.W., Read, B.P., Edelstein, R., Yang, N., Pierson, C.R., Stein, M.J., Wermer-Colan, A., Buj-Bello, A., Lachey, J.L., Seehra, J.S., and Beggs, A.H. (2011). Inhibition of activin receptor type IIB increases strength and lifespan in myotubularin-deficient mice. *Am. J. Pathol.* 178, 784–793.
47. Ide, Y., Tsuchimoto, D., Tominaga, Y., Nakashima, M., Watanabe, T., Sakumi, K., Ohno, M., and Nakabeppu, Y. (2004). Growth retardation and dyslymphopoiesis accompanied by G2/M arrest in APEX2-null mice. *Blood* 104, 4097–4103.
48. Tsuchimoto, D., Sakai, Y., Sakumi, K., Nishioka, K., Sasaki, M., Fujiwara, T., and Nakabeppu, Y. (2001). Human APE2 protein is mostly localized in the nuclei and to some extent in the mitochondria, while nuclear APE2 is partly associated with proliferating cell nuclear antigen. *Nucleic Acids Res.* 29, 2349–2360.
49. Zhao, J., Tian, Z., Kadomatsu, T., Xie, P., Miyata, K., Sugizaki, T., Endo, M., Zhu, S., Fan, H., Horiguchi, H., et al. (2018). Age-dependent increase in angiopoietin-like protein 2 accelerates skeletal muscle loss in mice. *J. Biol. Chem.* 293, 1596–1609.
50. Toiyama, Y., Tanaka, K., Kitajima, T., Shimura, T., Kawamura, M., Kawamoto, A., Okugawa, Y., Saigusa, S., Hiro, J., Inoue, Y., et al. (2014). Elevated serum angiopoietin-like protein 2 correlates with the metastatic properties of colorectal cancer: a serum biomarker for early diagnosis and recurrence. *Clin. Cancer Res.* 20, 6175–6186.
51. Liao, Y., Smyth, G.K., and Shi, W. (2014). featureCounts: an efficient general purpose program for assigning sequence reads to genomic features. *Bioinformatics* 30, 923–930.
52. Ritchie, M.E., Phipson, B., Wu, D., Hu, Y., Law, C.W., Shi, W., and Smyth, G.K. (2015). limma powers differential expression analyses for RNA-sequencing and microarray studies. *Nucleic Acids Res.* 43, e47.
53. Law, C.W., Alhamdoosh, M., Su, S., Dong, X., Tian, L., Smyth, G.K., and Ritchie, M.E. (2016). RNA-seq analysis is easy as 1-2-3 with limma, Glimma and edgeR. *F1000Res.* 5, 1408.



**Supplemental Information**

**AAV-Mediated Gene Transfer Restores a Normal  
Muscle Transcriptome in a Canine Model  
of X-Linked Myotubular Myopathy**

**Jean-Baptiste Dupont, Jianjun Guo, Edith Renaud-Gabardos, Karine Poulard, Virginie Latournerie, Michael W. Lawlor, Robert W. Grange, John T. Gray, Ana Buj-Bello, Martin K. Childers, and David L. Mack**

### Gene Ontology TOP 500 *Biceps*

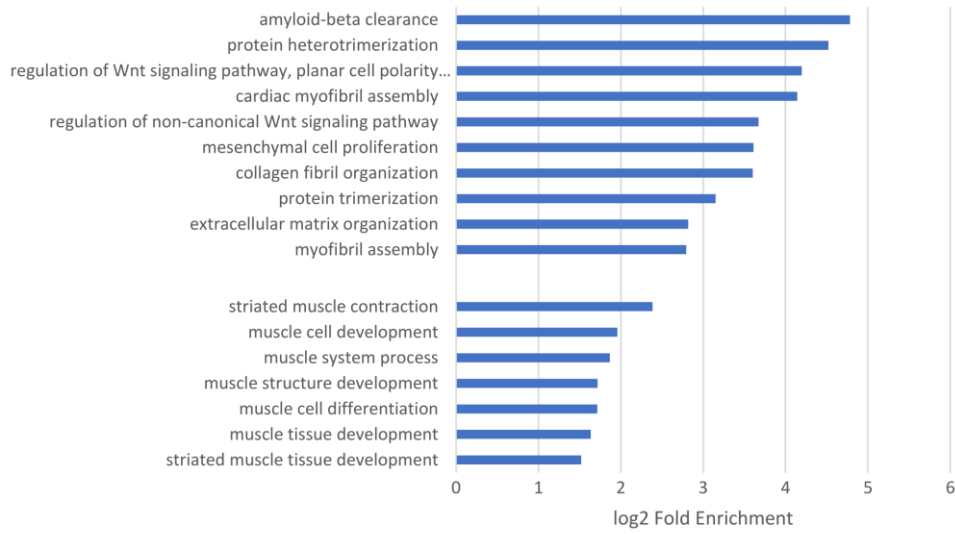

### Gene Ontology TOP 500 *Vastus*

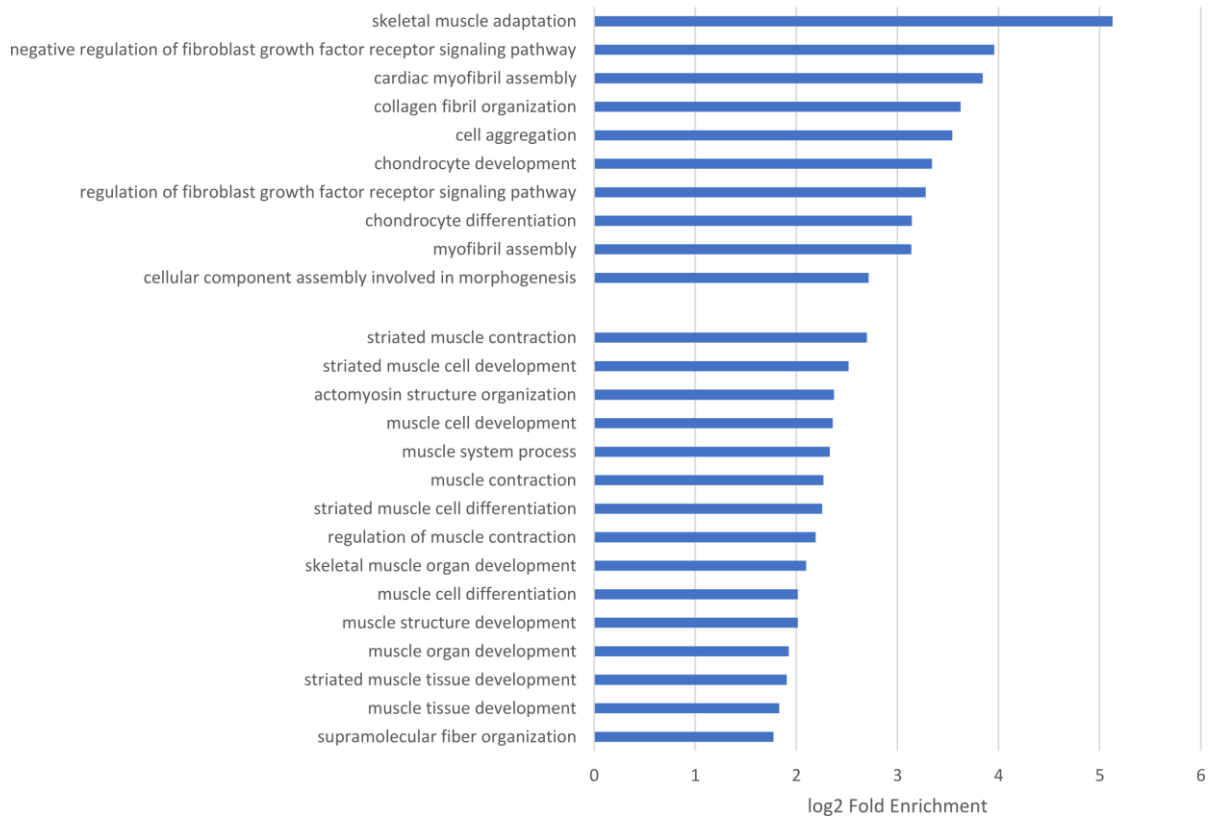

**Figure S1: Gene ontology analysis of the TOP 500 most informative genes.**

Gene ontology analysis of the 500 genes with the highest expression variance across samples in the *Biceps femoris* (top) and *Vastus lateralis* (bottom). The 10 GO terms with the highest fold enrichment (FE) are represented, and the muscle-related terms with a log<sub>2</sub> FE > 1.

**A Biceps femoris**

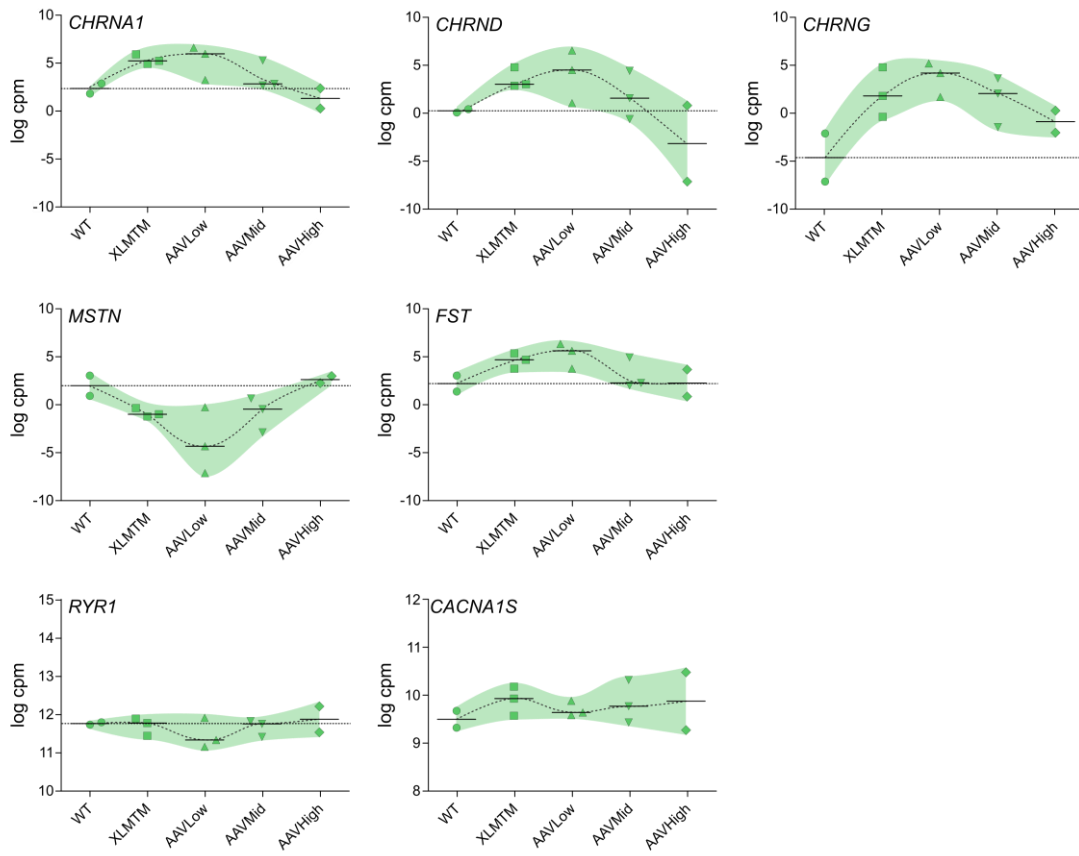

**B Vastus lateralis**

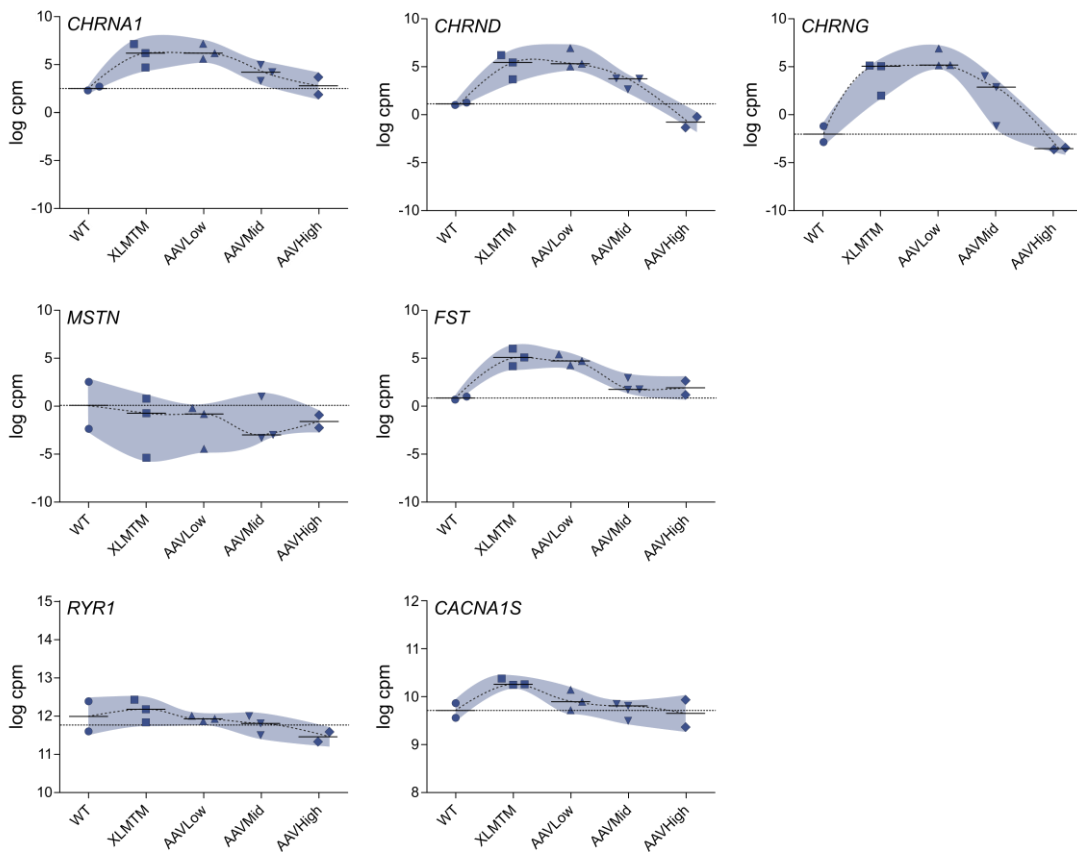

**Figure S2: Expression of individual genes associated with XLMTM in mice and human patients from RNA-Seq data in dogs.**

Gene expression data (log cpm) for three genes encoding cholinergic receptor subunits (*CHRNA1*, *CHRNA2*, *CHRND*), two myokines: myostatin (*MSTN*) and follistatin (*FST*), and two genes involved in excitation-contraction coupling: ryanodine receptor 1 (*RYR1*) and dihydropyridine receptor (*CACNA1S*) in the *Biceps femoris* (**A**) and the *Vastus lateralis* (**B**). Each symbol represents one individual dog. The median expression in healthy controls is shown as a horizontal dashed line, the expression range as a shaded area, and the evolution of the median as a dashed curve. cpm: count per million reads, log: base 2 logarithm.



### A *Biceps femoris*

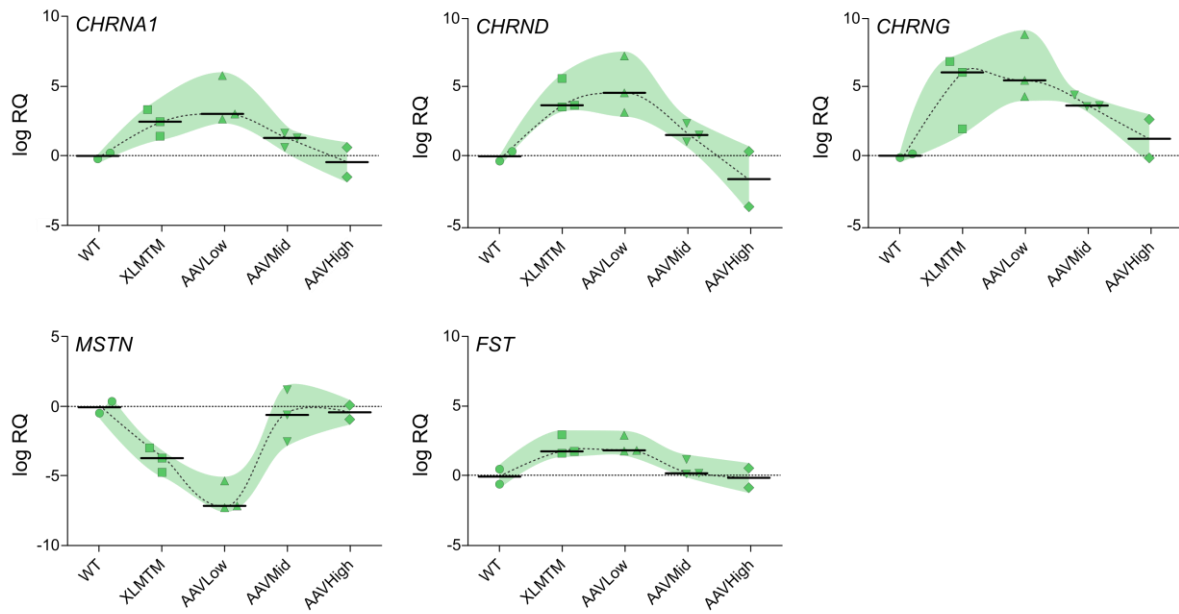

### B *Vastus lateralis*

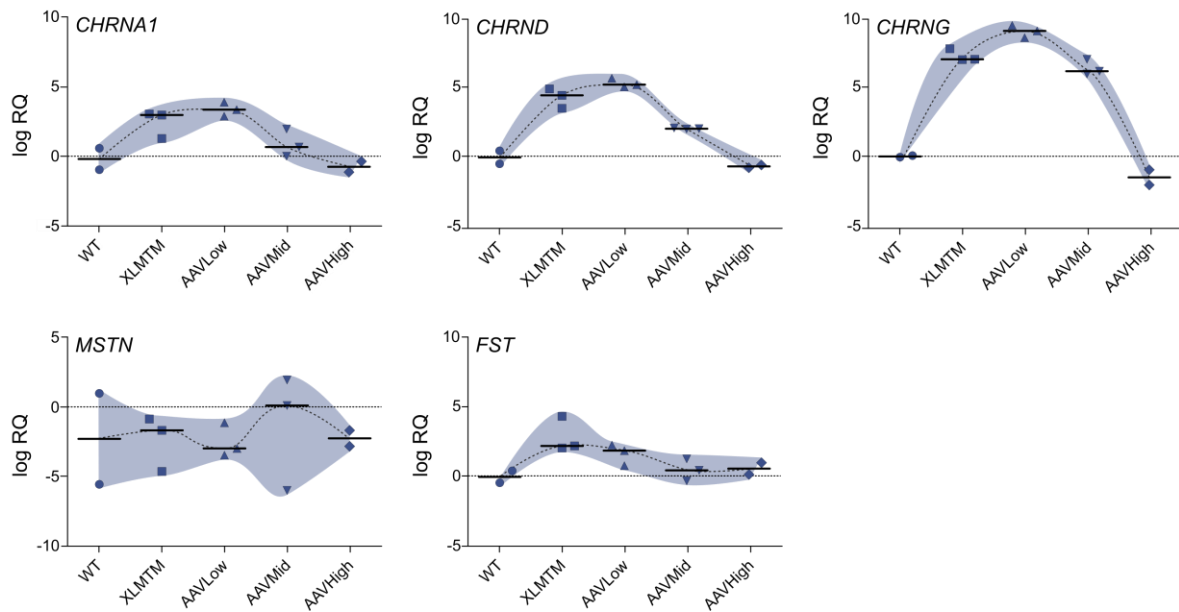

**Figure S3: Expression of individual genes associated with XLMTM from RT-qPCR data in dogs.**

Gene expression data (log RQ) for *CHRNA1*, *CHRNG*, *CHRND*, *MSTN* and *FST* in the *Biceps femoris* (A) and the *Vastus lateralis* (B). Each symbol represents one individual dog. The median expression in healthy controls is shown as a horizontal dashed line, the expression range as a shaded area, and the evolution of the median as a dashed curve. RQ: relative quantity after normalisation with the median value in the WT group, and the housekeeping gene *RPL32*. log: base 2 logarithm.

| SSAN ID  | Dog #  | Dog ID   | Group   | Genotype | Gender | Treatment | Necropsy |
|----------|--------|----------|---------|----------|--------|-----------|----------|
| SSAN_2   | Dog 03 | HEALTHY1 | healthy | WT       | Male   | Untreated | 39 weeks |
| SSAN_12  | Dog 09 | HEALTHY2 | healthy | WT       | Male   | Untreated | 39 weeks |
| SSAN_9   | Dog 06 | XLMTM1   | XLMTM   | XLMTM    | Female | Untreated | 18 weeks |
| SSAN_13  | Dog 10 | XLMTM2   | XLMTM   | XLMTM    | Female | Untreated | 22 weeks |
| SSAN_16  | Dog 12 | XLMTM3   | XLMTM   | XLMTM    | Male   | Untreated | 26 weeks |
| SSAN_8   | Dog 05 | AAVLOW1  | AAVLow  | XLMTM    | Male   | Low dose  | 24 weeks |
| SSAN_11  | Dog 08 | AAVLOW2  | AAVLow  | XLMTM    | Female | Low dose  | 28 weeks |
| SSAN_18  | Dog 13 | AAVLOW3  | AAVLow  | XLMTM    | Male   | Low dose  | 39 weeks |
| SSAN_4   | Dog 04 | AAVMID1  | AAVMid  | XLMTM    | Male   | Mid dose  | 39 weeks |
| SSAN_10  | Dog 07 | AAVMID2  | AAVMid  | XLMTM    | Male   | Mid dose  | 41 weeks |
| SSAN_14  | Dog 11 | AAVMID3  | AAVMid  | XLMTM    | Male   | Mid dose  | 39 weeks |
| SSAN_104 | Dog 14 | AAVHIGH1 | AAVHigh | XLMTM    | Male   | High dose | 39 weeks |
| SSAN_132 | Dog 16 | AAVHIGH2 | AAVHigh | XLMTM    | Male   | High dose | 39 weeks |

| SSAN ID  | Dose (vg/kg) | vg/dg <i>Biceps</i> | vg/dg <i>Vastus</i> | <i>MTM1</i> expression <i>Biceps</i> | <i>MTM1</i> expression <i>Vastus</i> | <i>MTM1</i> mRNA tag counts <i>Biceps</i> | <i>MTM1</i> mRNA tag counts <i>Vastus</i> |
|----------|--------------|---------------------|---------------------|--------------------------------------|--------------------------------------|-------------------------------------------|-------------------------------------------|
| SSAN_2   | NA           | NA                  | NA                  | NA                                   | NA                                   | NA                                        | NA                                        |
| SSAN_12  | NA           | NA                  | NA                  | NA                                   | NA                                   | NA                                        | NA                                        |
| SSAN_9   | NA           | NA                  | NA                  | NA                                   | NA                                   | 0,00E+00                                  | 0,00E+00                                  |
| SSAN_13  | NA           | NA                  | NA                  | NA                                   | NA                                   | 0,00E+00                                  | 0,00E+00                                  |
| SSAN_16  | NA           | NA                  | NA                  | NA                                   | NA                                   | 0,00E+00                                  | 0,00E+00                                  |
| SSAN_8   | 3,00E+13     | 0,23                | 0,058               | 4,80E-03                             | 4,00E-03                             | 2,00E-01                                  | 0,00E+00                                  |
| SSAN_11  | 3,00E+13     | 0,15                | 0,24                | 2,70E-04                             | 4,60E-04                             | 0,00E+00                                  | 2,00E-01                                  |
| SSAN_18  | 3,00E+13     | 0,19                | 0,17                | 1,70E-04                             | 4,70E-04                             | 1,40E+00                                  | 1,00E-01                                  |
| SSAN_4   | 2,00E+14     | 0,82                | 0,63                | 1,90E-03                             | 6,90E-03                             | 1,20E+00                                  | 1,00E+00                                  |
| SSAN_10  | 2,00E+14     | 1,5                 | 1,1                 | 3,10E-03                             | 5,70E-03                             | 4,80E+00                                  | 6,50E+00                                  |
| SSAN_14  | 2,00E+14     | 1,9                 | 0,77                | 1,00E-02                             | 6,50E-03                             | 1,30E+00                                  | 1,20E+00                                  |
| SSAN_104 | 5,00E+14     | 3,6                 | 2,5                 | 6,10E-02                             | 3,30E-02                             | 9,60E+00                                  | 1,38E+01                                  |
| SSAN_132 | 5,00E+14     | 2,1                 | 2,7                 | 2,70E-02                             | 8,50E-02                             | 1,53E+01                                  | 1,16E+01                                  |

**Table S1:** Details of the dog colony included in this study. Injected rAAV doses are expressed as vector genomes per kilogram (vg/kg); Biodistribution values (vector genomes per diploid genomes, or vg/dg) and *MTM1* expression were determined in a previous publication; *MTM1* tag counts were computed from RNA-seq data.

Table S2: List of differentially expressed genes in the Biceps femoris muscle of untreated XLMTM dogs, compared to WT controls; logFC: base 2 logarithm of the expression fold change (XLMTM / WT).

| ensembl ID        | Gene name | logFC      | PValue    |
|-------------------|-----------|------------|-----------|
| ENSCAFG0000000097 | ERBB3     | 1.9985494  | 0.0332438 |
| ENSCAFG0000000110 | MYL6B     | 1.8797503  | 0.0002234 |
| ENSCAFG0000000124 | TIMELESS  | 1.6642717  | 0.0006016 |
| ENSCAFG0000000225 |           | 2.1282097  | 0.0154395 |
| ENSCAFG0000000282 | HECA      | -1.2301175 | 1.41E-06  |
| ENSCAFG0000000288 |           | 1.2670245  | 0.0202622 |
| ENSCAFG0000000372 | UST       | 1.1944214  | 0.0184217 |
| ENSCAFG0000000413 | MTHFD1L   | 2.3592436  | 0.0340819 |
| ENSCAFG0000000420 | CPM       | 2.2756181  | 0.005788  |
| ENSCAFG0000000448 | DDR1      | 1.6574917  | 1.82E-05  |
| ENSCAFG0000000456 | THAP2     | -1.1867888 | 0.0043387 |
| ENSCAFG0000000510 | PRR16     | 5.0845169  | 0.0003611 |
| ENSCAFG0000000523 |           | 1.7383973  | 3.97E-05  |
| ENSCAFG0000000535 | MYCT1     | -1.1354123 | 0.0451202 |
| ENSCAFG0000000561 | MIOX      | -2.6739231 | 0.0171164 |
| ENSCAFG0000000577 | TIAM2     | 2.2271125  | 0.0003346 |
| ENSCAFG0000000611 | MEGF10    | 1.0430251  | 0.0223794 |
| ENSCAFG0000000617 | DDAH2     | 1.1560715  | 0.0387498 |
| ENSCAFG0000000670 | RIMS2     | 1.1761648  | 0.0305624 |
| ENSCAFG0000000722 | ADAMTS19  | 1.7618594  | 0.0083134 |
| ENSCAFG0000000733 |           | -1.3355278 | 0.035446  |
| ENSCAFG0000000761 | ATF6B     | 1.0228041  | 0.001874  |
| ENSCAFG0000000799 | ACSL6     | -1.2224653 | 0.0373349 |
| ENSCAFG0000000886 | DSE       | 1.4838567  | 0.0161702 |
| ENSCAFG0000000903 | COL11A2   | 2.5544118  | 0.0006814 |
| ENSCAFG0000000934 | COL14A1   | 1.4646104  | 0.0428096 |
| ENSCAFG0000001007 | FBXO32    | -1.1817054 | 0.000267  |
| ENSCAFG0000001049 | PMM1      | 1.0466784  | 0.0274554 |
| ENSCAFG0000001067 | RSPO3     | 2.1888589  | 0.0153841 |
| ENSCAFG0000001085 | SLC25A48  | -1.9601675 | 0.0453536 |
| ENSCAFG0000001086 | MYC       | 1.3094711  | 0.0163336 |
| ENSCAFG0000001106 | LAMA2     | 1.4344417  | 0.0147378 |
| ENSCAFG0000001178 | COL22A1   | 7.4573344  | 0.0025803 |
| ENSCAFG0000001286 | FANCC     | -1.03245   | 0.0181054 |
| ENSCAFG0000001287 | TCP11     | -1.0920636 | 0.004375  |
| ENSCAFG0000001290 | AKR1B1    | -1.0269683 | 0.0389057 |
| ENSCAFG0000001346 | RPL3      | 1.0253515  | 0.0048694 |
| ENSCAFG0000001402 | KDEL3     | 1.4323736  | 0.00394   |
| ENSCAFG0000001426 | COPG2     | 1.045375   | 0.0014912 |
| ENSCAFG0000001450 | MEST      | 1.1179495  | 0.0186534 |
| ENSCAFG0000001531 | SMO       | 1.3277523  | 0.0002888 |
| ENSCAFG0000001533 | TSPAN33   | 1.5150165  | 0.003072  |
| ENSCAFG0000001537 | FREM1     | 1.503814   | 0.0008517 |
| ENSCAFG0000001550 | FOXRED2   | 1.2566791  | 0.0018539 |
| ENSCAFG0000001556 | KCNK17    | 1.911231   | 0.003774  |

|                    |             |            |           |
|--------------------|-------------|------------|-----------|
| ENSCAFG00000001581 | ADAMTSL1    | -1.380429  | 0.0497587 |
| ENSCAFG00000001596 | FOXP4       | 1.4087347  | 0.002101  |
| ENSCAFG00000001646 | PRUNE2      | 3.9494118  | 0.000148  |
| ENSCAFG00000001649 | GCNT1       | 1.8660306  | 0.0252955 |
| ENSCAFG00000001715 | MOB3B       | -1.0691933 | 0.0040969 |
| ENSCAFG00000001718 | LRRC4       | 1.5438732  | 0.0279787 |
| ENSCAFG00000001793 | BTBD11      | 1.5986254  | 0.0004039 |
| ENSCAFG00000001875 | CKAP4       | 1.3618483  | 0.0004823 |
| ENSCAFG00000001909 | KIF24       | 1.5888741  | 0.0191826 |
| ENSCAFG00000001921 |             | 1.0944313  | 0.0017021 |
| ENSCAFG00000001923 | DNAI1       | 2.369146   | 0.0223892 |
| ENSCAFG00000001967 | C11H9orf131 | 1.3019602  | 0.0068244 |
| ENSCAFG00000001985 |             | 1.1720133  | 0.047631  |
| ENSCAFG00000002029 | SLC25A27    | 1.7397346  | 0.0015148 |
| ENSCAFG00000002046 | GNG11       | -1.0073856 | 0.0397899 |
| ENSCAFG00000002069 | COL1A2      | 1.7595663  | 0.0230639 |
| ENSCAFG00000002079 | KDR         | -1.5741134 | 0.0044802 |
| ENSCAFG00000002124 | ASB4        | -1.0883557 | 0.026295  |
| ENSCAFG00000002313 | OGN         | 1.5683242  | 0.0495788 |
| ENSCAFG00000002319 | KIAA1211L   | 1.907257   | 0.0098455 |
| ENSCAFG00000002397 | SHB         | 1.1487295  | 0.0376851 |
| ENSCAFG00000002463 | THADA       | 1.0425448  | 0.0489215 |
| ENSCAFG00000002517 |             | 1.0618587  | 0.0029055 |
| ENSCAFG00000002549 | CCDC30      | 1.702937   | 0.014782  |
| ENSCAFG00000002645 | KCNQ5       | 1.3076355  | 0.0204323 |
| ENSCAFG00000002656 | EEF1A1      | 1.1526119  | 0.0002931 |
| ENSCAFG00000002719 |             | -1.1616372 | 0.0014733 |
| ENSCAFG00000002748 |             | 1.3142511  | 5.48E-05  |
| ENSCAFG00000002793 | IRAK1BP1    | 1.4637036  | 0.0446567 |
| ENSCAFG00000002796 | CCDC88A     | 1.2007863  | 0.0016092 |
| ENSCAFG00000002830 | RIMS3       | -3.9995339 | 1.15E-05  |
| ENSCAFG00000002854 | IGLON5      | 3.2561771  | 0.0016178 |
| ENSCAFG00000002917 | AEBP1       | 2.9819573  | 0.0001523 |
| ENSCAFG00000002927 | CCDC85A     | -1.2465901 | 0.0389786 |
| ENSCAFG00000002928 | SVEP1       | 1.6089033  | 0.0291748 |
| ENSCAFG00000002940 | FANCL       | 1.2110468  | 0.0186004 |
| ENSCAFG00000003008 | C11H9orf84  | 2.6678407  | 0.0180982 |
| ENSCAFG00000003068 | NT5C1A      | -1.1484772 | 0.0148455 |
| ENSCAFG00000003096 | PM20D2      | 2.336963   | 0.0042426 |
| ENSCAFG00000003276 | ANTXR1      | 1.0594788  | 0.0208935 |
| ENSCAFG00000003290 | THAP5       | -1.1654024 | 6.96E-06  |
| ENSCAFG00000003327 | COL27A1     | 1.4750289  | 0.0345493 |
| ENSCAFG00000003340 | AKNA        | 1.3638802  | 0.0168268 |
| ENSCAFG00000003388 | SH3D21      | 1.2546736  | 0.0042817 |
| ENSCAFG00000003415 | ODC1        | 1.3276303  | 0.0011529 |
| ENSCAFG00000003426 | TNC         | 2.2162376  | 0.0274508 |
| ENSCAFG00000003458 | MMS22L      | 1.4704712  | 0.0238038 |
| ENSCAFG00000003528 | TCAF1       | 1.2339108  | 6.77E-05  |
| ENSCAFG00000003530 |             | 1.2723109  | 0.0088103 |
| ENSCAFG00000003602 | DLGAP3      | -3.0273129 | 0.0152416 |



|                    |            |            |           |
|--------------------|------------|------------|-----------|
| ENSCAFG00000003663 | GSN        | 1.0990708  | 0.0203371 |
| ENSCAFG00000003676 |            | -1.1229354 | 0.0104563 |
| ENSCAFG00000003680 | MYLK3      | 4.1453483  | 0.0077244 |
| ENSCAFG00000003720 | NRCAM      | 3.5965642  | 0.0004244 |
| ENSCAFG00000003775 | OSR1       | 3.0713999  | 0.0013638 |
| ENSCAFG00000003804 |            | 3.7122274  | 0.0011818 |
| ENSCAFG00000003810 | PPIL6      | 1.6225708  | 0.0234597 |
| ENSCAFG00000003816 | SMPD2      | 1.7334732  | 9.75E-05  |
| ENSCAFG00000003824 | MICAL1     | 1.6120148  | 0.0015947 |
| ENSCAFG00000003941 | SPATA6     | 1.5506013  | 0.0137541 |
| ENSCAFG00000003952 | PRKAR2B    | -1.3138355 | 0.0003656 |
| ENSCAFG00000003960 | TRAF3IP2   | 1.3352398  | 0.0305248 |
| ENSCAFG00000003991 | ARHGAP42   | 1.2132886  | 0.0088559 |
| ENSCAFG00000004034 | EMP3       | 1.3421992  | 0.0049694 |
| ENSCAFG00000004094 | DLL1       | 1.2356588  | 0.0139221 |
| ENSCAFG00000004127 | SESN3      | 2.238837   | 0.0005788 |
| ENSCAFG00000004128 | BBS7       | 1.0808872  | 0.0010358 |
| ENSCAFG00000004129 | ENDOD1     | 1.2077503  | 0.0425102 |
| ENSCAFG00000004176 | PANX1      | 1.9866858  | 0.0030761 |
| ENSCAFG00000004279 | MYO3A      | 2.4560244  | 0.0122156 |
| ENSCAFG00000004297 | CCDC8      | 3.5793053  | 4.82E-08  |
| ENSCAFG00000004331 |            | 1.2700819  | 0.039599  |
| ENSCAFG00000004392 | DMPK       | 1.6211355  | 3.22E-07  |
| ENSCAFG00000004481 | SLC6A6     | 1.4696773  | 0.0151837 |
| ENSCAFG00000004492 | GRIP2      | 1.4909129  | 0.0018855 |
| ENSCAFG00000004510 | CDC42EP4   | 1.2054268  | 0.0072079 |
| ENSCAFG00000004521 | FGD5       | -1.0615834 | 0.0247926 |
| ENSCAFG00000004529 | VIM        | 1.0635385  | 0.0097079 |
| ENSCAFG00000004555 | RARRES2    | 1.3785828  | 0.013323  |
| ENSCAFG00000004589 |            | 1.4814383  | 4.41E-06  |
| ENSCAFG00000004636 | BCAM       | 1.2950915  | 0.0030819 |
| ENSCAFG00000004731 | TENM4      | 1.2159264  | 0.0150583 |
| ENSCAFG00000004746 | XRCC1      | 1.4936749  | 0.0004644 |
| ENSCAFG00000004757 | PHLDB3     | 1.4590743  | 0.0124691 |
| ENSCAFG00000004767 | CAD        | 1.0603273  | 0.025034  |
| ENSCAFG00000004769 | OPTN       | -1.3753578 | 2.56E-05  |
| ENSCAFG00000004785 | IFT122     | 1.0453382  | 0.0337815 |
| ENSCAFG00000004816 | LLGL2      | -1.3801129 | 1.34E-06  |
| ENSCAFG00000004820 | ITGA9      | 1.7450106  | 0.0118668 |
| ENSCAFG00000004856 | PROSER2    | 2.837645   | 0.0039736 |
| ENSCAFG00000004866 | USP6NL     | 1.2535465  | 0.0258327 |
| ENSCAFG00000004916 | H3F3B      | 1.0246086  | 0.0015366 |
| ENSCAFG00000004931 | PLCD1      | 1.3246758  | 0.0255963 |
| ENSCAFG00000004958 | ATP1A3     | -2.1202771 | 0.0023034 |
| ENSCAFG00000005002 | TIMP4      | -1.6479683 | 0.014841  |
| ENSCAFG00000005081 | INSIG1     | -1.2274206 | 0.0005203 |
| ENSCAFG00000005122 | ST6GALNAC2 | -1.0318111 | 0.0336524 |
| ENSCAFG00000005179 | CAPN5      | 1.1688158  | 0.0269347 |
| ENSCAFG00000005276 | AKR1C3     | -1.7824195 | 0.0250211 |
| ENSCAFG00000005286 | SPTBN4     | 1.6113971  | 0.0325019 |

|                    |           |            |           |
|--------------------|-----------|------------|-----------|
| ENSCAFG00000005294 | TK1       | 1.7790676  | 1.88E-05  |
| ENSCAFG00000005301 | PSD3      | 1.9034447  | 0.0103111 |
| ENSCAFG00000005309 | LBH       | 1.4633129  | 0.0288686 |
| ENSCAFG00000005338 | BLVRB     | 1.1160045  | 0.0155426 |
| ENSCAFG00000005348 | EHD3      | 1.9949194  | 0.0109675 |
| ENSCAFG00000005411 | OSBPL10   | 1.3275133  | 0.033281  |
| ENSCAFG00000005433 | ABCC4     | -1.0520078 | 0.0234388 |
| ENSCAFG00000005468 | PFKP      | 1.1144971  | 0.0240206 |
| ENSCAFG00000005490 | KCNE3     | -1.4390698 | 0.0313692 |
| ENSCAFG00000005505 | PGM2L1    | -2.0765818 | 0.0021838 |
| ENSCAFG00000005527 | P4HA3     | 1.6524674  | 0.0438637 |
| ENSCAFG00000005530 | ZFP36     | 1.2676883  | 0.0338014 |
| ENSCAFG00000005564 | UCP2      | 1.7294193  | 4.62E-05  |
| ENSCAFG00000005595 | FARP1     | -1.9240399 | 0.0026851 |
| ENSCAFG00000005621 | BHLHE40   | -1.6394166 | 1.37E-05  |
| ENSCAFG00000005671 | LRRC3B    | -2.2832445 | 0.0417716 |
| ENSCAFG00000005768 | FOLR2     | 1.4761881  | 0.0005574 |
| ENSCAFG00000005843 | LTBP1     | 1.3917725  | 0.001155  |
| ENSCAFG00000005870 | RASGRP3   | -1.1556743 | 0.020389  |
| ENSCAFG00000005906 | PYCR1     | 1.0372012  | 0.0499938 |
| ENSCAFG00000005918 | ITGBL1    | 1.9319822  | 0.0222555 |
| ENSCAFG00000005965 | FOXO1     | 2.0143814  | 0.0089946 |
| ENSCAFG00000006006 | FASN      | 1.2944023  | 0.001018  |
| ENSCAFG00000006019 | FREM2     | 1.8096944  | 0.0042032 |
| ENSCAFG00000006053 |           | 2.2460045  | 1.22E-06  |
| ENSCAFG00000006065 | PRNP      | 1.0685898  | 0.0233865 |
| ENSCAFG00000006073 | POSTN     | 2.2391343  | 0.0285317 |
| ENSCAFG00000006089 | SMOX      | 1.1999842  | 0.0313584 |
| ENSCAFG00000006091 | KITLG     | -1.3918214 | 0.0439853 |
| ENSCAFG00000006106 | PCDHB4    | 1.9949895  | 0.0492364 |
| ENSCAFG00000006134 | KERA      | 1.9144364  | 0.0086623 |
| ENSCAFG00000006162 | SMAD9     | 2.0206298  | 7.25E-05  |
| ENSCAFG00000006164 | CYP1B1    | 2.4875799  | 0.0150899 |
| ENSCAFG00000006175 | CDC25B    | 1.4340212  | 0.0437163 |
| ENSCAFG00000006231 | DCLK1     | 3.8517736  | 8.65E-05  |
| ENSCAFG00000006234 | ADAM33    | 1.4705508  | 0.0291379 |
| ENSCAFG00000006240 | MCF2L     | -1.1343084 | 0.0090496 |
| ENSCAFG00000006255 | NBEA      | 1.0127911  | 0.0099608 |
| ENSCAFG00000006373 |           | 1.252037   | 0.0065335 |
| ENSCAFG00000006381 | SEMA3C    | 1.5015106  | 2.65E-05  |
| ENSCAFG00000006424 | GXYLT2    | 1.9611447  | 0.0018458 |
| ENSCAFG00000006474 | PGGHG     | 1.5468268  | 0.0176196 |
| ENSCAFG00000006513 |           | -1.1631644 | 0.0337534 |
| ENSCAFG00000006560 | NCAPH     | -1.6782798 | 0.0101947 |
| ENSCAFG00000006576 | WDFY4     | 1.8083009  | 0.0084989 |
| ENSCAFG00000006582 | TMEM80    | 1.1967136  | 0.0103567 |
| ENSCAFG00000006596 | ANKS1B    | 2.2046688  | 0.0028154 |
| ENSCAFG00000006607 | DPYSL3    | 1.5482832  | 0.0003571 |
| ENSCAFG00000006660 | SLC7A1    | -1.1137345 | 0.0004671 |
| ENSCAFG00000006703 | UHRF1BP1L | 1.2006648  | 0.0254162 |

|                   |          |            |           |
|-------------------|----------|------------|-----------|
| ENSCAFG0000006723 | SYT9     | 1.305997   | 0.0136821 |
| ENSCAFG0000006788 | MTIF3    | 1.2252995  | 0.0400223 |
| ENSCAFG0000006797 |          | 1.1522907  | 0.003321  |
| ENSCAFG0000006800 | FZD10    | 2.6678761  | 3.24E-06  |
| ENSCAFG0000006801 | HSPB6    | 1.0177213  | 0.011063  |
| ENSCAFG0000006865 | PAMR1    | 2.8225838  | 0.0366888 |
| ENSCAFG0000006877 | FAM110A  | 2.131169   | 0.0026386 |
| ENSCAFG0000006909 | LMO1     | -1.0000269 | 0.0476376 |
| ENSCAFG0000007001 |          | -1.1892256 | 0.0047148 |
| ENSCAFG0000007047 | MAL      | 1.6662122  | 0.0043244 |
| ENSCAFG0000007079 |          | 1.327442   | 0.000195  |
| ENSCAFG0000007111 | LGI4     | 1.7969568  | 0.0119873 |
| ENSCAFG0000007136 | TNFRSF19 | 1.3172106  | 0.0169519 |
| ENSCAFG0000007149 | FBLN7    | 2.7991707  | 0.0020696 |
| ENSCAFG0000007246 | CYP7B1   | 1.734161   | 0.0040176 |
| ENSCAFG0000007247 | ANKRD1   | 2.6989036  | 0.0114543 |
| ENSCAFG0000007295 | SREK1IP1 | -1.1670811 | 0.0037901 |
| ENSCAFG0000007338 | NR4A1    | -1.6583959 | 0.0339885 |
| ENSCAFG0000007344 | MYBL1    | 2.3065726  | 0.0003029 |
| ENSCAFG0000007358 | KCTD15   | 1.0389654  | 0.0289894 |
| ENSCAFG0000007465 | RHPN2    | -1.1797517 | 0.0149815 |
| ENSCAFG0000007486 | CEP89    | 1.3602764  | 0.0023939 |
| ENSCAFG0000007562 | AMPD3    | 2.6718334  | 0.0020755 |
| ENSCAFG0000007635 | CLSTN2   | 2.1583657  | 0.0069246 |
| ENSCAFG0000007750 | CASP3    | 1.0988799  | 0.0003011 |
| ENSCAFG0000007770 | LNPEP    | 1.095146   | 0.0093588 |
| ENSCAFG0000007847 | TIMM10   | -1.319757  | 2.77E-05  |
| ENSCAFG0000007853 | SAP30    | -1.0310148 | 0.0051343 |
| ENSCAFG0000007893 | RBP4     | 1.9676277  | 0.0006577 |
| ENSCAFG0000007936 | ASB14    | -1.3153049 | 0.0122949 |
| ENSCAFG0000007945 | PROCR    | 2.1209574  | 4.34E-05  |
| ENSCAFG0000007985 | PLCE1    | -1.2551266 | 0.0185598 |
| ENSCAFG0000008026 |          | 3.0904792  | 0.0023537 |
| ENSCAFG0000008062 |          | -2.6542478 | 0.0033238 |
| ENSCAFG0000008123 | TENM3    | 1.0424926  | 0.036091  |
| ENSCAFG0000008164 | TMEM154  | 1.9035179  | 0.0346694 |
| ENSCAFG0000008168 | TIGD4    | 2.2436324  | 0.0183034 |
| ENSCAFG0000008178 | GDAP1    | -1.0982379 | 0.0337935 |
| ENSCAFG0000008236 |          | 1.4913865  | 0.0064784 |
| ENSCAFG0000008288 | GPD1     | -1.0214588 | 0.0321299 |
| ENSCAFG0000008295 | BTG3     | 1.8138395  | 8.55E-05  |
| ENSCAFG0000008309 |          | -1.1472547 | 0.0013701 |
| ENSCAFG0000008319 | CHODL    | 2.0231766  | 0.0014243 |
| ENSCAFG0000008333 | TMEM161B | -1.0084087 | 0.0001793 |
| ENSCAFG0000008353 | SFRP2    | 3.748625   | 0.0208011 |
| ENSCAFG0000008418 | NCAM2    | 1.7019764  | 0.0121552 |
| ENSCAFG0000008477 | BLNK     | -1.181329  | 0.0180735 |
| ENSCAFG0000008519 | RTKN     | 1.3820235  | 0.0070425 |
| ENSCAFG0000008582 | VCAN     | 1.6419977  | 0.0260995 |
| ENSCAFG0000008597 | ANGPT2   | -1.8793916 | 0.0019207 |

|                    |             |            |           |
|--------------------|-------------|------------|-----------|
| ENSCAFG00000008640 | TUBA1B      | 1.419475   | 0.0022979 |
| ENSCAFG00000008661 |             | 1.3778535  | 0.0013452 |
| ENSCAFG00000008707 | CKMT2       | -1.2174245 | 0.0028461 |
| ENSCAFG00000008755 | SRC         | 1.5829432  | 0.0194801 |
| ENSCAFG00000008786 | NNAT        | 1.8604092  | 0.0003864 |
| ENSCAFG00000008795 | FKBP11      | 1.0520454  | 0.0209391 |
| ENSCAFG00000008830 | TRAFD1      | 1.0914067  | 0.0091799 |
| ENSCAFG00000008847 | KRTAP11-1   | 6.1451797  | 0.0022926 |
| ENSCAFG00000008860 | PAQR3       | -1.2955411 | 0.0305646 |
| ENSCAFG00000008898 | PRKG2       | 1.8261599  | 0.0065544 |
| ENSCAFG00000008942 | C18H11orf49 | 2.1313221  | 0.0014805 |
| ENSCAFG00000008975 | THBS4       | 1.6809482  | 0.0054384 |
| ENSCAFG00000008977 | LRP4        | 1.6413104  | 0.0054414 |
| ENSCAFG00000008978 | EVA1C       | 2.3088181  | 0.0058465 |
| ENSCAFG00000009005 | CYP26B1     | 4.7051139  | 4.05E-05  |
| ENSCAFG00000009017 | PPP1R16B    | -1.6980186 | 0.0096029 |
| ENSCAFG00000009022 | TMEM64      | 1.2981223  | 0.014941  |
| ENSCAFG00000009061 | SLC8B1      | 1.0017663  | 0.0408296 |
| ENSCAFG00000009066 | MYOD1       | 1.2792955  | 0.0177768 |
| ENSCAFG00000009076 | PLBD2       | 1.7185704  | 0.0087959 |
| ENSCAFG00000009096 | LXN         | 1.0015599  | 0.0260509 |
| ENSCAFG00000009097 | SDSL        | 2.9901595  | 0.0026625 |
| ENSCAFG00000009104 | STC1        | 1.5147805  | 0.0179325 |
| ENSCAFG00000009105 | FAM92A      | 2.0433652  | 0.0018501 |
| ENSCAFG00000009149 | SMIM4       | -1.0919755 | 0.0096576 |
| ENSCAFG00000009187 | LOXL2       | 1.4560932  | 0.0462805 |
| ENSCAFG00000009214 | DCBLD2      | 1.1738957  | 0.0011786 |
| ENSCAFG00000009286 | SLC38A1     | -1.1527532 | 0.0015299 |
| ENSCAFG00000009329 | PDLIM2      | 1.9559681  | 0.0124188 |
| ENSCAFG00000009333 | CES1        | -3.4388203 | 0.0018738 |
| ENSCAFG00000009337 | TUBB2A      | 3.3410081  | 1.38E-06  |
| ENSCAFG00000009363 | MAPK8IP1    | 1.2391063  | 0.0184794 |
| ENSCAFG00000009389 | NISCH       | 1.1586874  | 0.0031181 |
| ENSCAFG00000009398 | MSTN        | -3.164984  | 0.0339283 |
| ENSCAFG00000009414 | CHAC1       | 7.599053   | 0.0002984 |
| ENSCAFG00000009441 | CD82        | 1.7353972  | 0.0096871 |
| ENSCAFG00000009486 | RPGRIP1L    | 1.126024   | 0.0351896 |
| ENSCAFG00000009506 | ABI3BP      | 1.5258207  | 0.0405543 |
| ENSCAFG00000009510 | EXD1        | 1.5941081  | 0.0003677 |
| ENSCAFG00000009569 | SPP1        | -4.323991  | 0.0043623 |
| ENSCAFG00000009596 | RUNX1       | 2.8815053  | 0.0005218 |
| ENSCAFG00000009632 | TYRO3       | 2.0040869  | 0.0001808 |
| ENSCAFG00000009638 | ABCG2       | 1.6343402  | 0.0321226 |
| ENSCAFG00000009649 | PLEKHA6     | 1.5979977  | 0.033564  |
| ENSCAFG00000009653 | DOP1B       | 1.2841788  | 0.023787  |
| ENSCAFG00000009659 | HR          | 2.7208764  | 0.003756  |
| ENSCAFG00000009664 | MATN4       | 2.6985028  | 0.0323803 |
| ENSCAFG00000009673 |             | -1.3696139 | 0.0042723 |
| ENSCAFG00000009675 | LRRN2       | 1.5723657  | 0.0488991 |
| ENSCAFG00000009721 | ALCAM       | 1.5618096  | 0.0057404 |

|                    |          |            |           |
|--------------------|----------|------------|-----------|
| ENSCAFG0000009765  | CASQ2    | 1.5114943  | 0.0019356 |
| ENSCAFG0000009777  | NAV2     | 1.5776233  | 0.0001726 |
| ENSCAFG0000009869  | EHD4     | 1.2162919  | 0.0018567 |
| ENSCAFG0000009951  | SPAG17   | 4.4146001  | 0.0046066 |
| ENSCAFG0000009972  | ADAMTS8  | 3.6585067  | 0.0298222 |
| ENSCAFG0000009978  | ETS2     | 1.8766081  | 7.08E-05  |
| ENSCAFG00000010077 | LSP1     | 1.0056485  | 0.0163783 |
| ENSCAFG00000010090 | IGF2     | 3.2596448  | 6.39E-07  |
| ENSCAFG00000010121 | CD81     | 1.4512175  | 7.66E-05  |
| ENSCAFG00000010142 | SLC39A10 | 1.0400604  | 0.0299879 |
| ENSCAFG00000010144 | ELK4     | -1.0067964 | 0.0226801 |
| ENSCAFG00000010148 | SLC45A3  | 1.8067576  | 0.0303809 |
| ENSCAFG00000010175 | CDH22    | -2.4595502 | 0.0016223 |
| ENSCAFG00000010186 | RAB29    | -1.2470001 | 0.0005853 |
| ENSCAFG00000010225 | PHKB     | -1.0820698 | 0.0010003 |
| ENSCAFG00000010239 | IKBKE    | 1.2959729  | 0.0060096 |
| ENSCAFG00000010274 | CHI3L1   | 5.7851446  | 6.00E-06  |
| ENSCAFG00000010285 | ABCG1    | 4.4374559  | 0.0015662 |
| ENSCAFG00000010288 | MYBPH    | 3.5261957  | 0.0001335 |
| ENSCAFG00000010298 | ADORA1   | 4.1882323  | 1.99E-07  |
| ENSCAFG00000010309 | MYOG     | 1.845086   | 0.0002147 |
| ENSCAFG00000010395 | ADAMTS16 | 4.4817655  | 6.24E-06  |
| ENSCAFG00000010408 | MLEC     | -1.039298  | 0.0176709 |
| ENSCAFG00000010423 | COL4A4   | 2.2444751  | 0.0217273 |
| ENSCAFG00000010432 | TIRAP    | -1.0758181 | 0.0350677 |
| ENSCAFG00000010496 | YARS2    | -1.0233588 | 0.0025834 |
| ENSCAFG00000010499 | CDON     | 1.1667513  | 0.0122247 |
| ENSCAFG00000010581 | CYB561D2 | 1.3088232  | 0.014197  |
| ENSCAFG00000010588 | MARCKSL1 | 2.7707109  | 0.0023246 |
| ENSCAFG00000010593 | GSTO1    | 1.3344276  | 0.0104336 |
| ENSCAFG00000010619 | BICD1    | 2.649061   | 4.59E-05  |
| ENSCAFG00000010652 | STK17B   | 1.1842598  | 0.0356781 |
| ENSCAFG00000010654 | AGPAT3   | -1.5393306 | 0.0005408 |
| ENSCAFG00000010698 | LTO1     | -1.0143746 | 0.0090374 |
| ENSCAFG00000010716 | TPCN2    | 1.1272684  | 0.043151  |
| ENSCAFG00000010790 | SLC9B1   | 4.0642172  | 0.0005452 |
| ENSCAFG00000010815 | TGFB2    | 2.2452102  | 1.75E-06  |
| ENSCAFG00000010823 | ZBTB20   | 1.5619384  | 0.0043654 |
| ENSCAFG00000010825 |          | 4.0140832  | 0.0084377 |
| ENSCAFG00000010874 | SULF2    | -1.5770631 | 0.0281543 |
| ENSCAFG00000010883 | FMO5     | -1.3040493 | 0.0009988 |
| ENSCAFG00000010925 | HFE      | 2.0423876  | 1.27E-06  |
| ENSCAFG00000010936 | NPNT     | 3.5606977  | 2.55E-06  |
| ENSCAFG00000010982 | FAM20A   | 1.620957   | 0.0408181 |
| ENSCAFG00000011067 | DHRX     | -1.0921928 | 0.000296  |
| ENSCAFG00000011069 | GJA5     | -1.5652421 | 0.00623   |
| ENSCAFG00000011086 | SLC16A6  | 3.1290211  | 0.0007078 |
| ENSCAFG00000011107 | STK32C   | -1.3005556 | 0.0241408 |
| ENSCAFG00000011166 |          | -1.0829869 | 0.016809  |
| ENSCAFG00000011218 |          | 1.4517993  | 0.0196666 |

|                    |            |            |           |
|--------------------|------------|------------|-----------|
| ENSCAFG00000011283 | CHRND      | 3.5588582  | 0.0008666 |
| ENSCAFG00000011330 | NEK7       | -1.0911281 | 2.14E-05  |
| ENSCAFG00000011336 | MARC1      | -1.5080368 | 0.0101459 |
| ENSCAFG00000011348 | AFAP1L2    | 1.4361807  | 0.0069577 |
| ENSCAFG00000011378 | ANKRD34A   | 2.5022911  | 0.0161449 |
| ENSCAFG00000011426 | PTGIS      | 1.6365529  | 0.0078697 |
| ENSCAFG00000011428 | KRAS       | -1.0043451 | 0.0109602 |
| ENSCAFG00000011458 | LRMP       | 2.4578377  | 0.0126301 |
| ENSCAFG00000011477 | BSN        | 2.5773378  | 0.0037533 |
| ENSCAFG00000011498 | SGSM1      | 2.4600022  | 0.0008814 |
| ENSCAFG00000011542 | HAPLN3     | 1.6162553  | 0.0423641 |
| ENSCAFG00000011605 | EFS        | 1.9837756  | 1.07E-05  |
| ENSCAFG00000011646 | ZFHX2      | 1.7450498  | 0.0124095 |
| ENSCAFG00000011652 | MTMR11     | 1.700243   | 0.0052361 |
| ENSCAFG00000011682 | XIRP2      | 1.3134881  | 0.0092161 |
| ENSCAFG00000011744 | LAMB2      | 1.4917481  | 6.01E-05  |
| ENSCAFG00000011745 | SORL1      | 1.2493712  | 0.0385312 |
| ENSCAFG00000011817 | COL18A1    | 1.0466518  | 0.0480526 |
| ENSCAFG00000011823 | MN1        | 1.4931132  | 0.001027  |
| ENSCAFG00000011921 | ASB11      | -1.0674039 | 0.0032952 |
| ENSCAFG00000011930 | CCNDBP1    | -1.1206306 | 0.0007448 |
| ENSCAFG00000011960 | C4H1orf198 | 1.0904987  | 0.0231915 |
| ENSCAFG00000011964 | GCNT7      | 1.4583412  | 0.0391818 |
| ENSCAFG00000011974 | EPB42      | -1.2027071 | 0.0016859 |
| ENSCAFG00000011977 | KIF7       | 2.0208166  | 0.0001534 |
| ENSCAFG00000012022 |            | 1.9845705  | 0.000157  |
| ENSCAFG00000012039 | ZNF710     | 1.2893167  | 0.0385898 |
| ENSCAFG00000012046 | IFI6       | 2.2650207  | 0.0034025 |
| ENSCAFG00000012095 | AHDC1      | 1.1151061  | 6.09E-05  |
| ENSCAFG00000012152 | GABBR1     | 1.1737669  | 0.0289307 |
| ENSCAFG00000012175 | SLC26A6    | -1.6185167 | 0.0010282 |
| ENSCAFG00000012222 |            | 1.2385832  | 0.001716  |
| ENSCAFG00000012376 | VASH2      | 2.1323489  | 0.0029083 |
| ENSCAFG00000012428 | HES6       | 2.0126644  | 0.0210662 |
| ENSCAFG00000012432 | MYOZ2      | 1.6092946  | 0.0394641 |
| ENSCAFG00000012493 | PFKFB4     | -1.7922405 | 0.0243999 |
| ENSCAFG00000012525 | MUC13      | 4.2271254  | 3.81E-05  |
| ENSCAFG00000012556 | HTRA1      | 1.560124   | 0.0017622 |
| ENSCAFG00000012742 | MTFP1      | -1.5381091 | 0.0029954 |
| ENSCAFG00000012803 | RIN1       | 3.4011473  | 4.51E-07  |
| ENSCAFG00000012805 | SLC25A12   | -1.1238026 | 0.017736  |
| ENSCAFG00000012824 | SCN4B      | -1.5043535 | 0.0112979 |
| ENSCAFG00000012834 | SLC35E4    | 1.3974836  | 0.0002253 |
| ENSCAFG00000012860 | RAPH1      | 1.2051238  | 0.0024533 |
| ENSCAFG00000012904 | CDK1       | 1.86909    | 0.0303179 |
| ENSCAFG00000012925 | PHKA2      | 1.307548   | 0.0454466 |
| ENSCAFG00000012963 |            | 2.646114   | 0.0005253 |
| ENSCAFG00000012979 | CABCOCO1   | -1.0147807 | 0.0444818 |
| ENSCAFG00000013006 | ITGA6      | -1.0897465 | 0.0499311 |
| ENSCAFG00000013020 | STMN3      | 1.7524345  | 0.0090174 |



|                    |          |            |           |
|--------------------|----------|------------|-----------|
| ENSCAFG00000013030 | PDHA1    | -1.2582977 | 0.0064577 |
| ENSCAFG00000013042 | MYOM3    | 1.4743933  | 0.0107657 |
| ENSCAFG00000013098 | ZNF750   | -1.956704  | 0.0054493 |
| ENSCAFG00000013195 | EFEMP2   | 1.5427688  | 0.0004771 |
| ENSCAFG00000013198 | FAM234B  | 1.0223832  | 0.0104746 |
| ENSCAFG00000013199 |          | 1.0030748  | 0.0475596 |
| ENSCAFG00000013260 | KLHL34   | 1.1853515  | 0.0382216 |
| ENSCAFG00000013283 | CHRNA1   | 2.9606093  | 6.85E-06  |
| ENSCAFG00000013367 | HIP1     | 1.4075213  | 1.33E-06  |
| ENSCAFG00000013423 | FUOM     | -1.0463725 | 0.0446137 |
| ENSCAFG00000013483 | TMEM120A | -1.0259625 | 0.045893  |
| ENSCAFG00000013489 | UCK2     | 1.4569271  | 0.0002208 |
| ENSCAFG00000013500 | LTBP3    | 1.6657797  | 1.25E-05  |
| ENSCAFG00000013521 | POLA1    | 1.0773683  | 0.0009952 |
| ENSCAFG00000013544 | HSPB1    | 1.0103984  | 0.0017707 |
| ENSCAFG00000013600 | PTH1R    | 1.904094   | 0.0158524 |
| ENSCAFG00000013627 | HHIPL2   | -1.4953735 | 0.0344696 |
| ENSCAFG00000013723 | SHF      | 2.4715009  | 0.0493235 |
| ENSCAFG00000013728 | MYL4     | 1.7469811  | 0.0369631 |
| ENSCAFG00000013735 | ITGB3    | 1.3294749  | 0.0442336 |
| ENSCAFG00000013765 | MYL10    | 1.7510174  | 0.0295485 |
| ENSCAFG00000013778 | PLA2G4A  | 1.1835954  | 0.0441095 |
| ENSCAFG00000013819 | FMNL1    | 1.1166418  | 0.0161139 |
| ENSCAFG00000013844 | NCAM1    | 2.9879962  | 0.0014817 |
| ENSCAFG00000013874 | CXCR6    | -1.5894894 | 0.0050372 |
| ENSCAFG00000013904 | BCL6     | 1.1057104  | 0.0013396 |
| ENSCAFG00000013909 | SERPINE1 | 2.1188311  | 0.006915  |
| ENSCAFG00000013990 |          | 1.0084104  | 0.0189195 |
| ENSCAFG00000014016 | DLAT     | -1.3390803 | 0.0038942 |
| ENSCAFG00000014025 | TTN      | 1.4445079  | 0.0119511 |
| ENSCAFG00000014049 | CLEC3B   | 1.4917439  | 0.0312897 |
| ENSCAFG00000014054 | ACHE     | 1.7101293  | 0.048664  |
| ENSCAFG00000014120 |          | 1.0228138  | 0.0055869 |
| ENSCAFG00000014124 | CHCHD10  | -1.3405629 | 0.0016796 |
| ENSCAFG00000014170 | GMIP     | 1.0059172  | 0.0478879 |
| ENSCAFG00000014237 | L2HGDH   | -1.5465101 | 0.0003665 |
| ENSCAFG00000014308 | ALAS2    | 1.5514593  | 0.0001249 |
| ENSCAFG00000014310 | APEX2    | 1.5301556  | 0.0001018 |
| ENSCAFG00000014343 | SAP25    | 3.4013529  | 0.0133023 |
| ENSCAFG00000014410 | CHST3    | 1.1087675  | 0.0296418 |
| ENSCAFG00000014443 | TSC22D4  | 1.3023706  | 1.30E-05  |
| ENSCAFG00000014448 | ZNF804A  | 2.8298813  | 0.0001171 |
| ENSCAFG00000014451 | MAOB     | -4.1786538 | 4.33E-07  |
| ENSCAFG00000014453 | AFAP1    | 1.0634352  | 0.0181045 |
| ENSCAFG00000014474 | IGFBP5   | 2.0624697  | 0.0058444 |
| ENSCAFG00000014490 | IGFBP2   | 4.0896174  | 0.0028689 |
| ENSCAFG00000014529 | CENPL    | 1.4391555  | 0.0116044 |
| ENSCAFG00000014551 | GAL3ST4  | 1.7826514  | 0.0234653 |
| ENSCAFG00000014582 | SERPINI1 | 2.8793334  | 9.01E-06  |
| ENSCAFG00000014627 |          | 1.1761091  | 0.0041188 |

|                    |             |            |           |
|--------------------|-------------|------------|-----------|
| ENSCAFG00000014777 | RCOR2       | 2.0924226  | 0.0064773 |
| ENSCAFG00000014812 | COL3A1      | 1.7284213  | 0.0230001 |
| ENSCAFG00000014835 | USP54       | 1.4163658  | 0.0445425 |
| ENSCAFG00000014923 | FGF7        | 2.8722276  | 0.0068474 |
| ENSCAFG00000014968 |             | 1.5405599  | 1.72E-06  |
| ENSCAFG00000014978 |             | 1.5139895  | 0.0001429 |
| ENSCAFG00000015013 | LGALS3      | 1.4125828  | 0.0318277 |
| ENSCAFG00000015027 | METTL11B    | -2.0559084 | 0.0107291 |
| ENSCAFG00000015078 | FAM184B     | 2.424281   | 0.0008864 |
| ENSCAFG00000015196 | SCNN1A      | 1.5036275  | 0.0333578 |
| ENSCAFG00000015209 | TUBA4A      | -1.5157688 | 0.0215853 |
| ENSCAFG00000015217 |             | -1.6895544 | 0.0139284 |
| ENSCAFG00000015235 | SLC19A2     | -1.0788877 | 0.0153086 |
| ENSCAFG00000015256 | FAM129C     | -1.200929  | 0.029636  |
| ENSCAFG00000015326 | SLC38A5     | 1.9879507  | 0.0034427 |
| ENSCAFG00000015345 | CC2D2A      | 1.0004909  | 0.0264898 |
| ENSCAFG00000015372 | CPEB2       | -1.0892319 | 0.0116984 |
| ENSCAFG00000015455 | ECT2        | 1.4983674  | 0.0064693 |
| ENSCAFG00000015484 | WSCD1       | -2.1157461 | 0.0063044 |
| ENSCAFG00000015539 | PAX7        | 1.4949196  | 0.0151456 |
| ENSCAFG00000015550 |             | 1.6064299  | 0.0060471 |
| ENSCAFG00000015618 | TULP3       | 1.2051253  | 0.0050993 |
| ENSCAFG00000015625 | FMN2        | 1.671686   | 0.0177983 |
| ENSCAFG00000015691 | C20H19orf44 | 1.0848136  | 0.0277254 |
| ENSCAFG00000015731 | ZNF385C     | 2.7184383  | 0.0043604 |
| ENSCAFG00000015788 | B4GALNT3    | 2.3258458  | 0.0246481 |
| ENSCAFG00000015856 |             | 1.5768267  | 0.000532  |
| ENSCAFG00000015902 | P3H4        | 1.3775296  | 0.0185076 |
| ENSCAFG00000015903 |             | 1.065626   | 0.0073049 |
| ENSCAFG00000015918 | RAB31L1     | 1.3988076  | 0.0213654 |
| ENSCAFG00000015920 | HAP1        | 5.9189062  | 0.0001631 |
| ENSCAFG00000015936 | EPHA4       | -1.7754173 | 0.0084408 |
| ENSCAFG00000015939 | CPLANE2     | 1.3462585  | 0.0062097 |
| ENSCAFG00000016036 |             | 7.3382519  | 0.0153119 |
| ENSCAFG00000016072 |             | 1.6673666  | 0.0149674 |
| ENSCAFG00000016192 | SDK1        | 1.5816064  | 0.028572  |
| ENSCAFG00000016257 | MCC         | -1.4720147 | 0.0037506 |
| ENSCAFG00000016265 | RELL1       | 1.0405075  | 0.0309604 |
| ENSCAFG00000016338 | KAZN        | 2.1394648  | 0.0024173 |
| ENSCAFG00000016342 | PCDH7       | 1.3317898  | 0.0234205 |
| ENSCAFG00000016356 |             | 1.1123007  | 0.0302976 |
| ENSCAFG00000016402 | SEL1L3      | 1.5970157  | 0.0252012 |
| ENSCAFG00000016423 | PIGH        | -1.1379221 | 0.0015057 |
| ENSCAFG00000016465 | MAGED2      | 1.0708573  | 0.0069458 |
| ENSCAFG00000016479 | TMEM184A    | -2.8310203 | 0.0019848 |
| ENSCAFG00000016550 | ASB12       | -1.1813558 | 0.0338087 |
| ENSCAFG00000016615 | MRI1        | 1.1243049  | 0.0157275 |
| ENSCAFG00000016679 | MAP3K9      | -2.1018381 | 1.37E-05  |
| ENSCAFG00000016710 | TMEM175     | -1.0239274 | 1.06E-05  |
| ENSCAFG00000016736 | FBXL19      | 1.5250898  | 0.0193548 |

|                    |         |            |           |
|--------------------|---------|------------|-----------|
| ENSCAFG00000016755 | CRABP2  | 3.4061132  | 0.0001938 |
| ENSCAFG00000016769 | NES     | 1.5885783  | 0.0001854 |
| ENSCAFG00000016811 | RHBG    | -1.2139594 | 0.0390907 |
| ENSCAFG00000016828 | COPZ2   | 1.55606    | 9.93E-05  |
| ENSCAFG00000017018 | COL1A1  | 2.1820931  | 0.0051535 |
| ENSCAFG00000017024 | ZC2HC1C | -1.0476075 | 0.004418  |
| ENSCAFG00000017033 | EME1    | 1.531999   | 0.0211695 |
| ENSCAFG00000017050 | ACSF2   | 1.4978868  | 0.0309289 |
| ENSCAFG00000017080 | EPN3    | 1.6601416  | 0.0087207 |
| ENSCAFG00000017112 | SPG21   | 1.0279531  | 0.0008303 |
| ENSCAFG00000017125 |         | -1.4548424 | 0.0059763 |
| ENSCAFG00000017157 | HDAC8   | 1.0553816  | 0.0005174 |
| ENSCAFG00000017160 | IGDCC4  | 1.1793074  | 0.0014497 |
| ENSCAFG00000017262 | MYH10   | 1.7261126  | 0.0236976 |
| ENSCAFG00000017326 |         | 2.7536982  | 0.0293583 |
| ENSCAFG00000017329 | FLRT2   | 1.2105097  | 0.0025166 |
| ENSCAFG00000017397 | ZNF711  | 2.0527961  | 0.0007113 |
| ENSCAFG00000017428 | SWSAP1  | 1.792016   | 0.0207625 |
| ENSCAFG00000017478 | TTC8    | 1.1792995  | 0.0118093 |
| ENSCAFG00000017484 | CYFIP2  | 1.4170584  | 0.0264051 |
| ENSCAFG00000017493 | TSPOAP1 | 1.1371426  | 0.0311239 |
| ENSCAFG00000017550 | S100A4  | 2.1240684  | 0.0358078 |
| ENSCAFG00000017553 | S100A6  | 1.5117525  | 0.0044401 |
| ENSCAFG00000017557 | S100A8  | 2.6007141  | 0.0045293 |
| ENSCAFG00000017575 | MYH4    | -1.7587674 | 0.0357635 |
| ENSCAFG00000017612 | ASB2    | -1.1992848 | 0.0001212 |
| ENSCAFG00000017615 | ST8SIA5 | -1.110632  | 0.0058133 |
| ENSCAFG00000017616 | LARP6   | 1.6476799  | 0.0141807 |
| ENSCAFG00000017623 | LRRC49  | 1.5510622  | 0.0235205 |
| ENSCAFG00000017655 |         | -1.2403254 | 0.0147905 |
| ENSCAFG00000017702 | ARMCX6  | 2.1443514  | 6.07E-05  |
| ENSCAFG00000017705 | ARMCX2  | 2.4298609  | 5.15E-05  |
| ENSCAFG00000017774 | ARMCX5  | 1.2952388  | 0.0193136 |
| ENSCAFG00000017820 | CD276   | 1.2141377  | 0.0053039 |
| ENSCAFG00000017823 |         | -1.3003938 | 0.0168346 |
| ENSCAFG00000017883 | NRK     | 5.0184123  | 3.84E-05  |
| ENSCAFG00000017889 | EVL     | 1.0430067  | 0.0034213 |
| ENSCAFG00000017931 | RNF128  | -1.5185238 | 0.0010198 |
| ENSCAFG00000017937 | CYP1A1  | -3.905976  | 0.0006994 |
| ENSCAFG00000018005 | MAN2C1  | 1.091192   | 0.0006648 |
| ENSCAFG00000018017 | RNF138  | -1.0593869 | 0.0255011 |
| ENSCAFG00000018020 | COL4A5  | 2.1538485  | 0.0178569 |
| ENSCAFG00000018027 | GPRC5B  | -1.3592749 | 1.75E-05  |
| ENSCAFG00000018047 |         | 2.4537473  | 0.0013029 |
| ENSCAFG00000018051 | DSG2    | 1.0198546  | 0.0496081 |
| ENSCAFG00000018125 | AQP4    | -2.2918826 | 0.0138088 |
| ENSCAFG00000018127 | TMC7    | 1.3249101  | 0.039771  |
| ENSCAFG00000018173 | LAMA3   | -1.2667093 | 0.0360097 |
| ENSCAFG00000018175 | CAPN6   | 2.1028427  | 3.67E-06  |
| ENSCAFG00000018194 |         | 2.008607   | 0.0026407 |

|                    |          |            |           |
|--------------------|----------|------------|-----------|
| ENSCAFG00000018272 | KLHL13   | 1.0241092  | 0.0180757 |
| ENSCAFG00000018277 |          | 2.127095   | 0.002478  |
| ENSCAFG00000018314 | CD209    | 2.5268014  | 0.0160053 |
| ENSCAFG00000018360 |          | 4.5329804  | 9.56E-05  |
| ENSCAFG00000018405 | FST      | 2.4748204  | 0.0012487 |
| ENSCAFG00000018415 | MOCS2    | -1.0281283 | 0.0311253 |
| ENSCAFG00000018457 | NT5M     | -1.9198135 | 0.0039645 |
| ENSCAFG00000018511 |          | 1.2177671  | 0.0498374 |
| ENSCAFG00000018560 | MYH11    | 1.9569557  | 0.0313494 |
| ENSCAFG00000018576 | NIM1K    | -3.6134555 | 0.0314474 |
| ENSCAFG00000018586 |          | 1.1431839  | 0.0023519 |
| ENSCAFG00000018602 | SH2D3A   | -1.512252  | 0.0362645 |
| ENSCAFG00000018621 | CACHD1   | 1.4397581  | 0.0034935 |
| ENSCAFG00000018629 | WSB1     | 1.0999997  | 0.0083139 |
| ENSCAFG00000018643 | SLC25A23 | 2.1966473  | 0.0015464 |
| ENSCAFG00000018661 | LIFR     | -1.2735578 | 0.0095799 |
| ENSCAFG00000018670 | PGM1     | -1.1011143 | 0.0283704 |
| ENSCAFG00000018673 | SMARCA1  | 1.0045601  | 0.0019892 |
| ENSCAFG00000018702 | EFCAB7   | -2.4450627 | 0.0003251 |
| ENSCAFG00000018704 | SLC1A3   | -1.8758384 | 0.0117275 |
| ENSCAFG00000018761 | PIEZO2   | 2.0808526  | 0.0480345 |
| ENSCAFG00000018785 | ARHGAP36 | 2.1698577  | 0.0347071 |
| ENSCAFG00000018825 |          | 2.3704429  | 0.0029332 |
| ENSCAFG00000018832 | TUBB6    | 1.0036915  | 0.0087306 |
| ENSCAFG00000018864 | GPC3     | 2.0093935  | 0.0159679 |
| ENSCAFG00000018873 |          | -1.3988726 | 0.0304302 |
| ENSCAFG00000018959 | EMP2     | 1.1732602  | 0.0012158 |
| ENSCAFG00000018982 | MYO5B    | -1.5390049 | 0.0131695 |
| ENSCAFG00000019014 | SEMA6B   | 2.0486197  | 0.0005613 |
| ENSCAFG00000019132 | RPH3AL   | -1.331736  | 0.0394341 |
| ENSCAFG00000019134 | PPL      | 1.3445513  | 0.0350349 |
| ENSCAFG00000019166 | ROGDI    | -2.2268224 | 0.0014886 |
| ENSCAFG00000019176 | ZNF185   | 1.6260798  | 0.0483279 |
| ENSCAFG00000019177 | SLC1A7   | 1.3475283  | 0.0410859 |
| ENSCAFG00000019183 | PODN     | 1.1923539  | 0.0428267 |
| ENSCAFG00000019189 | BGN      | 2.3303051  | 0.001354  |
| ENSCAFG00000019230 | ATP2B3   | 1.7097685  | 0.0488578 |
| ENSCAFG00000019242 | PNCK     | -2.0762739 | 0.0240895 |
| ENSCAFG00000019377 | CAMKK1   | 2.1178586  | 0.0004866 |
| ENSCAFG00000019401 | PGP      | -1.0041762 | 0.0003175 |
| ENSCAFG00000019479 |          | 1.1048443  | 0.0226916 |
| ENSCAFG00000019489 | TP73     | 2.5996216  | 0.0011885 |
| ENSCAFG00000019541 | TRAF2    | 1.1306474  | 0.0010248 |
| ENSCAFG00000019601 | SOX8     | 2.508841   | 6.49E-05  |
| ENSCAFG00000019662 | PIGQ     | 1.3793072  | 0.0073281 |
| ENSCAFG00000019694 | GPSM1    | 1.7453234  | 0.0001708 |
| ENSCAFG00000019698 | PALM     | 1.0935731  | 0.0160607 |
| ENSCAFG00000019714 | SLC2A5   | 3.0560386  | 0.0366847 |
| ENSCAFG00000019719 | TPGS1    | 1.0672361  | 0.0123473 |
| ENSCAFG00000019729 | MIER2    | 1.0058426  | 0.0075446 |

|                    |              |            |           |
|--------------------|--------------|------------|-----------|
| ENSCAFG00000019764 | DENND2D      | -1.1679023 | 0.0347351 |
| ENSCAFG00000019794 | SARDH        | 1.6664619  | 0.0058041 |
| ENSCAFG00000019837 | MYBPHL       | -2.4319198 | 0.0120532 |
| ENSCAFG00000019848 | COL5A1       | 1.5319236  | 0.0149272 |
| ENSCAFG00000019852 | CBFA2T3      | 1.7435625  | 3.81E-05  |
| ENSCAFG00000019902 | RAPGEF1      | -1.0223041 | 0.0001979 |
| ENSCAFG00000019914 |              | -1.1392902 | 0.0206516 |
| ENSCAFG00000019956 | WFDC1        | 2.0840362  | 0.0128731 |
| ENSCAFG00000019964 | DNAAF1       | -2.5300487 | 0.0161126 |
| ENSCAFG00000019998 | SLC30A7      | 1.3465529  | 0.0144063 |
| ENSCAFG00000020004 | VCAM1        | 1.4868283  | 0.0086088 |
| ENSCAFG00000020024 | DYNLRB2      | 2.0593855  | 0.0218078 |
| ENSCAFG00000020110 | F3           | 1.3966068  | 0.0252582 |
| ENSCAFG00000020133 | BCAR3        | 1.383005   | 0.0032513 |
| ENSCAFG00000020144 | FUK          | 1.0334578  | 0.0039397 |
| ENSCAFG00000020145 |              | -1.4896673 | 0.0291662 |
| ENSCAFG00000020153 | MTSS1L       | 1.5078105  | 0.0005418 |
| ENSCAFG00000020166 | ANGPTL2      | 2.6370734  | 3.37E-08  |
| ENSCAFG00000020256 | ODF2L        | 1.4931876  | 0.0062113 |
| ENSCAFG00000020270 | COL24A1      | 3.3611464  | 0.0003387 |
| ENSCAFG00000020294 | HAS3         | -2.180502  | 0.0047527 |
| ENSCAFG00000020304 | SSX2IP       | 1.3445015  | 0.0003108 |
| ENSCAFG00000020345 | PTGFR        | -2.7532282 | 0.0023044 |
| ENSCAFG00000020413 | CDH5         | -1.3855965 | 0.026379  |
| ENSCAFG00000020633 | cfa-mir-133a | 1.1614569  | 0.0034251 |
| ENSCAFG00000020713 | RF00279      | -1.6847085 | 0.0003797 |
| ENSCAFG00000021575 | RF00100      | 4.0455491  | 0.0071943 |
| ENSCAFG00000021919 | RF00100      | 4.2425627  | 0.0022207 |
| ENSCAFG00000021953 | RF00100      | 3.8509152  | 0.0066893 |
| ENSCAFG00000022010 | RF00100      | 4.0197572  | 0.0022227 |
| ENSCAFG00000022297 | RF00012      | 2.9367081  | 0.0100984 |
| ENSCAFG00000022574 | RF00100      | 4.6652664  | 0.0021845 |
| ENSCAFG00000022720 |              | 1.4363181  | 0.0103548 |
| ENSCAFG00000022721 |              | 1.3919904  | 0.0212696 |
| ENSCAFG00000022843 | MIR675       | 3.9588961  | 3.01E-05  |
| ENSCAFG00000023022 |              | -1.2549395 | 0.0068233 |
| ENSCAFG00000023094 | MYH3         | 1.7453169  | 0.0001939 |
| ENSCAFG00000023313 |              | 2.1944873  | 0.0333169 |
| ENSCAFG00000023339 |              | -1.1525263 | 0.0132799 |
| ENSCAFG00000023755 | GMPPB        | 1.1331362  | 0.0275096 |
| ENSCAFG00000023757 | ADAMTSL2     | 1.8139829  | 0.0251371 |
| ENSCAFG00000023759 | MT2A         | 3.3656166  | 0.0001174 |
| ENSCAFG00000023881 | ZNF227       | 1.3708991  | 0.0086881 |
| ENSCAFG00000023887 | BCAS4        | 1.8259834  | 0.0146779 |
| ENSCAFG00000023904 | CHRN4        | 2.2639691  | 0.0099671 |
| ENSCAFG00000023986 | TMEM121      | 1.9995846  | 0.0163271 |
| ENSCAFG00000024187 | DPEP2        | -1.4942701 | 0.0274082 |
| ENSCAFG00000024239 | MLLT11       | 2.9445566  | 0.0004494 |
| ENSCAFG00000024609 | CNTN2        | 2.1734298  | 0.0011631 |
| ENSCAFG00000024681 |              | 3.5540753  | 0.000546  |

|                    |             |            |           |
|--------------------|-------------|------------|-----------|
| ENSCAFG00000024731 | RP9         | -1.0923094 | 0.001598  |
| ENSCAFG00000024802 |             | 1.0538697  | 0.0490096 |
| ENSCAFG00000024807 | CHRNA       | 6.4101752  | 0.0001536 |
| ENSCAFG00000024834 |             | 2.6919239  | 0.0140258 |
| ENSCAFG00000024901 | ZSCAN12     | -1.1339625 | 0.0057243 |
| ENSCAFG00000024908 | PLA2G4E     | 2.8758367  | 0.001596  |
| ENSCAFG00000025020 |             | 1.005517   | 0.0481236 |
| ENSCAFG00000025213 | FAM111B     | 1.1300711  | 0.0132696 |
| ENSCAFG00000025295 |             | 1.1393788  | 0.0006477 |
| ENSCAFG00000025390 | SLC22A17    | 2.0374905  | 7.29E-05  |
| ENSCAFG00000025473 | CPA4        | 1.2926093  | 0.0043027 |
| ENSCAFG00000025524 |             | 1.0511327  | 0.0114232 |
| ENSCAFG00000025555 |             | -2.6909253 | 0.016625  |
| ENSCAFG00000025589 |             | -1.117152  | 0.0461707 |
| ENSCAFG00000025678 | cfa-mir-568 | 1.0256103  | 0.0434385 |
| ENSCAFG00000027573 |             | 2.4892775  | 3.81E-05  |
| ENSCAFG00000027890 | RF00002     | 2.2516003  | 0.0133556 |
| ENSCAFG00000028220 | RF00009     | 5.1149746  | 0.000296  |
| ENSCAFG00000028459 | MT3         | 2.8744037  | 0.0004428 |
| ENSCAFG00000028460 |             | 2.3652681  | 0.0011151 |
| ENSCAFG00000028490 |             | 1.7891883  | 0.0322275 |
| ENSCAFG00000028544 |             | 2.6257845  | 0.0080108 |
| ENSCAFG00000028594 | RF01973     | 3.7917289  | 3.18E-05  |
| ENSCAFG00000028636 | IGFBP6      | 1.3041374  | 0.0212964 |
| ENSCAFG00000028647 | BGLAP       | 2.2628671  | 0.0037027 |
| ENSCAFG00000028653 |             | 1.907295   | 0.0059677 |
| ENSCAFG00000028708 | SCD5        | -1.3344739 | 0.04675   |
| ENSCAFG00000028739 | ABHD10      | -1.2262447 | 0.0085553 |
| ENSCAFG00000028748 |             | 3.3619939  | 0.0029589 |
| ENSCAFG00000028753 | RF00001     | 2.6811898  | 0.0361246 |
| ENSCAFG00000028761 |             | 1.3584144  | 0.0487441 |
| ENSCAFG00000028802 | MRPL34      | -1.1449448 | 0.0002084 |
| ENSCAFG00000028808 |             | 1.4620694  | 0.0027875 |
| ENSCAFG00000028817 | CFD         | 1.3802115  | 0.013706  |
| ENSCAFG00000028869 | GPX8        | 1.1557273  | 0.010241  |
| ENSCAFG00000028877 |             | -1.1322645 | 0.0240401 |
| ENSCAFG00000028947 | ELN         | 1.8641504  | 0.0049252 |
| ENSCAFG00000028958 | TCEAL7      | 3.7209306  | 0.0001178 |
| ENSCAFG00000028982 |             | 1.3853987  | 0.0432197 |
| ENSCAFG00000028987 |             | 3.5433383  | 0.0015061 |
| ENSCAFG00000029004 |             | -1.2820236 | 0.0002613 |
| ENSCAFG00000029079 | ZNF614      | 1.0374636  | 0.0172793 |
| ENSCAFG00000029129 | RF01871     | 3.54521    | 1.28E-05  |
| ENSCAFG00000029130 | KAZALD1     | 2.0050846  | 0.005158  |
| ENSCAFG00000029153 | PEG3        | 1.0453331  | 0.0092147 |
| ENSCAFG00000029304 | RF01972     | 4.2701575  | 7.95E-06  |
| ENSCAFG00000029322 | SCN2B       | 2.4707413  | 0.0060704 |
| ENSCAFG00000029324 |             | 1.0206873  | 0.0478012 |
| ENSCAFG00000029369 |             | 2.8714409  | 0.0040285 |
| ENSCAFG00000029381 |             | 1.3972429  | 0.0207192 |



|                    |          |            |           |
|--------------------|----------|------------|-----------|
| ENSCAFG00000029384 |          | 2.6621783  | 0.0084145 |
| ENSCAFG00000029474 | GADD45A  | 1.409163   | 0.0013478 |
| ENSCAFG00000029499 |          | 3.1489717  | 0.0119107 |
| ENSCAFG00000029502 |          | 1.2176111  | 0.0071638 |
| ENSCAFG00000029512 |          | 2.7447172  | 0.0180189 |
| ENSCAFG00000029612 | MSS51    | -1.8274801 | 0.0435307 |
| ENSCAFG00000029657 |          | 2.9692702  | 0.0074776 |
| ENSCAFG00000029673 |          | 1.4969374  | 0.0002389 |
| ENSCAFG00000029853 | CDKN1A   | 2.9091499  | 1.35E-06  |
| ENSCAFG00000029856 | RF01881  | 8.0200698  | 0.0200494 |
| ENSCAFG00000029882 | MISP     | 5.1712415  | 1.65E-06  |
| ENSCAFG00000029937 | EFHD1    | 2.3529143  | 0.0011461 |
| ENSCAFG00000030004 | COA7     | -1.0688607 | 8.85E-05  |
| ENSCAFG00000030025 | FGL2     | 1.641265   | 0.0002306 |
| ENSCAFG00000030105 | IL33     | 1.4345488  | 0.0422877 |
| ENSCAFG00000030120 | CSPG4    | 2.7799717  | 0.0005772 |
| ENSCAFG00000030140 |          | 2.8599576  | 0.0057306 |
| ENSCAFG00000030170 | ZNF229   | 1.1313469  | 0.0487053 |
| ENSCAFG00000030198 |          | 2.0380779  | 0.0270569 |
| ENSCAFG00000030205 | KCTD1    | 1.109113   | 0.0247439 |
| ENSCAFG00000030240 | DUSP4    | 1.01176    | 0.0194178 |
| ENSCAFG00000030242 | HS3ST2   | 1.5293694  | 0.0011212 |
| ENSCAFG00000030310 |          | 1.5452991  | 0.0099306 |
| ENSCAFG00000030348 |          | -1.2217618 | 0.0010206 |
| ENSCAFG00000030356 |          | 1.1828407  | 0.0262119 |
| ENSCAFG00000030412 | BCL2L11  | 1.2916706  | 0.0367189 |
| ENSCAFG00000030416 | RGS16    | -1.1745519 | 0.0106075 |
| ENSCAFG00000030425 |          | -1.3599376 | 0.0177819 |
| ENSCAFG00000030469 |          | 3.9851279  | 0.0003344 |
| ENSCAFG00000030538 |          | -1.1587034 | 0.0403714 |
| ENSCAFG00000030576 | PPP1R15A | 1.2488683  | 0.0080266 |
| ENSCAFG00000030616 |          | 3.2498502  | 0.0042798 |
| ENSCAFG00000030655 |          | 4.2787272  | 0.0008717 |
| ENSCAFG00000030662 |          | 1.7734667  | 0.0204471 |
| ENSCAFG00000030667 |          | 1.3199661  | 0.0078169 |
| ENSCAFG00000030670 |          | 1.0237026  | 0.0178795 |
| ENSCAFG00000030686 | GLIPR2   | 1.3445222  | 0.0158092 |
| ENSCAFG00000030757 |          | 1.0113553  | 0.0373816 |
| ENSCAFG00000030770 |          | 2.106183   | 2.52E-05  |
| ENSCAFG00000030835 |          | -1.2894461 | 0.0031047 |
| ENSCAFG00000030867 | HPCAL4   | -1.7995289 | 0.001087  |
| ENSCAFG00000030875 |          | 2.1590787  | 0.0074889 |
| ENSCAFG00000030932 | TMEM218  | 2.1827057  | 0.000795  |
| ENSCAFG00000031172 | CADM4    | 1.0076534  | 0.010747  |
| ENSCAFG00000031239 |          | 1.5317568  | 0.0189766 |
| ENSCAFG00000031281 |          | 3.1999672  | 0.000871  |
| ENSCAFG00000031299 |          | 1.5004841  | 0.0012285 |
| ENSCAFG00000031302 |          | 1.2318253  | 0.0035419 |
| ENSCAFG00000031337 |          | 1.2002897  | 0.0428143 |
| ENSCAFG00000031392 | PRR7     | 1.4726677  | 0.0108541 |

|                    |          |            |           |
|--------------------|----------|------------|-----------|
| ENSCAFG00000031481 |          | -2.0915967 | 0.0043924 |
| ENSCAFG00000031490 |          | 2.8652406  | 0.0067246 |
| ENSCAFG00000031499 | GLIS3    | 2.0046546  | 0.0270222 |
| ENSCAFG00000031514 |          | 2.9934354  | 0.0035361 |
| ENSCAFG00000031544 |          | 1.9944877  | 0.0185174 |
| ENSCAFG00000031706 |          | -1.2258907 | 0.048265  |
| ENSCAFG00000031727 | STC2     | 1.6863172  | 0.0114515 |
| ENSCAFG00000031759 | NAPRT    | 1.1033874  | 0.0289729 |
| ENSCAFG00000031894 | TENT5A   | 1.227333   | 0.0367399 |
| ENSCAFG00000031922 | GPX3     | 2.3486299  | 0.0121651 |
| ENSCAFG00000031936 | NRBF2    | -1.2288764 | 0.0170197 |
| ENSCAFG00000031938 | GEM      | 1.6532407  | 0.023744  |
| ENSCAFG00000032024 | GPR162   | -2.0269322 | 0.0187453 |
| ENSCAFG00000032029 |          | 1.0383588  | 0.0189227 |
| ENSCAFG00000032032 |          | -1.3905757 | 0.0176839 |
| ENSCAFG00000032043 |          | -1.9397272 | 0.0012097 |
| ENSCAFG00000032089 |          | 1.4611743  | 0.0409852 |
| ENSCAFG00000032112 | TAL2     | 3.649864   | 0.0110786 |
| ENSCAFG00000032120 | C1QTNF6  | 1.8173234  | 0.0066008 |
| ENSCAFG00000032147 | BAALC    | -1.4898624 | 0.0007005 |
| ENSCAFG00000032163 |          | 2.8190653  | 0.0140401 |
| ENSCAFG00000032167 |          | 2.8133738  | 0.0052328 |
| ENSCAFG00000032191 | MAP1A    | 2.3750453  | 0.0251785 |
| ENSCAFG00000032214 |          | 2.6736124  | 0.011212  |
| ENSCAFG00000032227 | OLFM1    | 3.3765206  | 1.23E-05  |
| ENSCAFG00000032235 |          | 1.144905   | 0.0080936 |
| ENSCAFG00000032276 |          | 2.9731028  | 0.004711  |
| ENSCAFG00000032286 |          | 1.4669801  | 0.0147116 |
| ENSCAFG00000032331 |          | 3.5397125  | 0.0049591 |
| ENSCAFG00000032392 |          | 1.2463359  | 0.0002074 |
| ENSCAFG00000032403 | MAP3K7CL | 1.506873   | 0.0100996 |
| ENSCAFG00000032443 |          | 3.4716236  | 0.001794  |
| ENSCAFG00000032445 |          | 1.8445519  | 0.0009014 |
| ENSCAFG00000032467 |          | 2.9223795  | 0.0055118 |
| ENSCAFG00000032571 |          | 3.4435978  | 1.44E-05  |
| ENSCAFG00000032572 |          | 3.7383654  | 0.0014285 |
| ENSCAFG00000032575 |          | -1.6026832 | 0.0070082 |
| ENSCAFG00000032608 | LURAP1L  | -1.0209278 | 0.0451573 |
| ENSCAFG00000032684 |          | 1.4374918  | 0.0202985 |
| ENSCAFG00000032696 |          | 2.6616931  | 0.0184259 |
| ENSCAFG00000032697 | MAP6D1   | -2.2936664 | 0.0022139 |
| ENSCAFG00000032871 |          | 1.913815   | 0.031141  |
| ENSCAFG00000032896 |          | 1.9658944  | 0.0013117 |
| ENSCAFG00000032925 |          | 1.5000178  | 0.0239158 |
| ENSCAFG00000033011 |          | -2.7498582 | 0.0199728 |
| ENSCAFG00000033181 |          | 1.1039208  | 0.0017598 |
| ENSCAFG00000033248 |          | -3.8962083 | 5.12E-05  |
| ENSCAFG00000033312 |          | -1.4508388 | 0.0116434 |
| ENSCAFG00000033531 |          | 2.8653777  | 0.0060876 |
| ENSCAFG00000033759 |          | -4.1657867 | 0.0013268 |

|                    |            |           |
|--------------------|------------|-----------|
| ENSCAFG00000034014 | -1.9095631 | 0.0002254 |
| ENSCAFG00000034213 | 1.4423746  | 0.0087016 |
| ENSCAFG00000034661 | 1.7239482  | 0.005424  |
| ENSCAFG00000034853 | -1.4165901 | 0.0092611 |
| ENSCAFG00000034881 | 1.7999213  | 0.0092183 |
| ENSCAFG00000035036 | -1.834187  | 0.0248834 |
| ENSCAFG00000035199 | 3.6010681  | 0.000318  |
| ENSCAFG00000035602 | 1.5694818  | 0.0240247 |
| ENSCAFG00000035834 | -2.5156096 | 0.0154571 |
| ENSCAFG00000036044 | 1.9723707  | 0.040506  |
| ENSCAFG00000036200 | -1.4070921 | 0.0179547 |
| ENSCAFG00000036350 | -2.584086  | 0.0416305 |
| ENSCAFG00000036996 | 1.4684042  | 0.006014  |
| ENSCAFG00000037515 | 1.3333519  | 0.0081007 |
| ENSCAFG00000037835 | -2.0754566 | 0.0096627 |
| ENSCAFG00000037878 | -2.6736902 | 1.93E-06  |
| ENSCAFG00000038197 | 1.507816   | 0.0363727 |
| ENSCAFG00000038302 | 2.9220076  | 0.0050989 |
| ENSCAFG00000038320 | -2.4808233 | 9.85E-08  |
| ENSCAFG00000038468 | 3.9072856  | 0.0002694 |
| ENSCAFG00000038525 | -1.0654407 | 0.0375253 |
| ENSCAFG00000038545 | 1.693673   | 0.0123975 |
| ENSCAFG00000038558 | 3.0831221  | 0.0001577 |
| ENSCAFG00000038812 | -2.0347806 | 0.038946  |
| ENSCAFG00000039156 | -1.0317933 | 0.0427547 |
| ENSCAFG00000039836 | 5.0522795  | 0.0018335 |
| ENSCAFG00000040479 | -3.108107  | 0.0104588 |
| ENSCAFG00000040506 | 1.8240824  | 0.0249977 |
| ENSCAFG00000040611 | 1.651615   | 0.0362967 |

Table S3: List of differentially expressed genes in the Vastus lateralis muscle of untreated XLMTM dogs, compared to WT controls; logFC: base 2 logarithm of the expression fold change (XLMTM / WT).

| ensembl ID         | Gene name | logFC        | PValue      |
|--------------------|-----------|--------------|-------------|
| ENSCAFG00000000068 | BCL2      | 1.512914721  | 0.005146778 |
| ENSCAFG00000000082 | CDK2      | 1.172962758  | 0.012277282 |
| ENSCAFG00000000097 | ERBB3     | 2.836526719  | 0.003004938 |
| ENSCAFG00000000124 | TIMELESS  | 1.393514773  | 0.013025503 |
| ENSCAFG00000000235 | N4BP3     | -1.313344461 | 0.001392379 |
| ENSCAFG00000000236 | RMND5B    | -1.048452164 | 0.001016577 |
| ENSCAFG00000000251 | MAP3K5    | 1.266306896  | 0.018975459 |
| ENSCAFG00000000282 | HECA      | -1.116657654 | 0.000100464 |
| ENSCAFG00000000288 |           | 1.225063765  | 0.014366904 |
| ENSCAFG00000000311 | LRIG3     | 1.300635589  | 0.035351857 |
| ENSCAFG00000000330 | FBXO30    | 1.052853722  | 0.008727095 |
| ENSCAFG00000000420 | CPM       | 2.721416191  | 0.000992424 |
| ENSCAFG00000000426 | LYZ       | -1.27603093  | 1.00E-05    |
| ENSCAFG00000000448 | DDR1      | 1.154792529  | 0.030021316 |
| ENSCAFG00000000456 | THAP2     | -1.029351568 | 0.003465968 |
| ENSCAFG00000000479 | KCNC2     | 1.198295396  | 0.019905426 |
| ENSCAFG00000000493 | OSR2      | 1.592400768  | 0.005010673 |
| ENSCAFG00000000510 | PRR16     | 3.965700458  | 2.68E-07    |
| ENSCAFG00000000522 | SNCAIP    | -1.248719196 | 0.005918512 |
| ENSCAFG00000000523 |           | 1.27777025   | 0.003421019 |
| ENSCAFG00000000535 | MYCT1     | -1.542886278 | 6.70E-05    |
| ENSCAFG00000000565 |           | 1.142983473  | 0.011662693 |
| ENSCAFG00000000568 | MAPK8IP2  | 1.044702044  | 0.026063634 |
| ENSCAFG00000000569 | ZNF608    | 1.1270997    | 0.00171455  |
| ENSCAFG00000000594 | MARCH3    | 1.044053623  | 0.047267013 |
| ENSCAFG00000000611 | MEGF10    | 1.239697597  | 0.001356059 |
| ENSCAFG00000000622 | PRRC1     | 1.158353573  | 0.001115949 |
| ENSCAFG00000000626 |           | 1.118519336  | 0.003150302 |
| ENSCAFG00000000639 | HSPA1L    | -1.016924772 | 0.000512148 |
| ENSCAFG00000000640 |           | -1.387721827 | 0.008899671 |
| ENSCAFG00000000641 |           | -1.361720915 | 0.011875895 |
| ENSCAFG00000000644 | SYNJ2     | 1.022446966  | 0.034369308 |
| ENSCAFG00000000654 | FZD6      | -1.053074181 | 0.00378533  |
| ENSCAFG00000000667 | FNDC1     | 2.103958151  | 0.007866071 |
| ENSCAFG00000000671 | SOD2      | -1.111481233 | 0.008075719 |
| ENSCAFG00000000701 |           | 1.53986253   | 9.93E-06    |
| ENSCAFG00000000750 | SLC22A1   | 3.041867806  | 0.018075209 |
| ENSCAFG00000000798 |           | -1.333510837 | 0.02002046  |
| ENSCAFG00000000840 | SLC22A4   | 1.528584769  | 0.010455085 |
| ENSCAFG00000000884 | WDR27     | 1.459863864  | 0.018722658 |
| ENSCAFG00000000886 | DSE       | 1.632552992  | 7.49E-06    |
| ENSCAFG00000000934 | COL14A1   | 2.085664665  | 0.000262749 |
| ENSCAFG00000000946 | A4GALT    | 1.17478725   | 4.82E-05    |
| ENSCAFG00000001023 | MEI1      | 1.010716423  | 0.041012045 |
| ENSCAFG00000001106 | LAMA2     | 1.964839444  | 0.006539003 |
| ENSCAFG00000001126 | KLHL3     | 1.302068645  | 0.015689971 |

|                    |            |              |             |
|--------------------|------------|--------------|-------------|
| ENSCAFG00000001166 | KHDRBS3    | 1.913245744  | 0.003910825 |
| ENSCAFG00000001176 | MRPL55     | -1.012312936 | 0.010033826 |
| ENSCAFG00000001250 | MROH5      | 2.312570414  | 0.018277086 |
| ENSCAFG00000001287 | TCP11      | -2.03217957  | 0.000182647 |
| ENSCAFG00000001299 | ZC3H3      | 1.125862995  | 0.038769959 |
| ENSCAFG00000001317 | EEF1D      | -1.33016626  | 0.000415693 |
| ENSCAFG00000001324 | ATF4       | -1.420750897 | 0.00129299  |
| ENSCAFG00000001336 | ISCA1      | -1.007809986 | 0.000626821 |
| ENSCAFG00000001426 | COPG2      | 1.131063216  | 3.89E-05    |
| ENSCAFG00000001438 | PI16       | 1.545078912  | 0.024936228 |
| ENSCAFG00000001453 | RASEF      | -2.146153007 | 0.000103851 |
| ENSCAFG00000001513 | KCTD17     | -1.568934667 | 6.95E-05    |
| ENSCAFG00000001515 | STRIP2     | 1.255825654  | 0.000840832 |
| ENSCAFG00000001531 | SMO        | 1.110486728  | 0.024652808 |
| ENSCAFG00000001537 | FREM1      | 1.621795963  | 0.004323272 |
| ENSCAFG00000001556 | KCNK17     | 2.305177845  | 7.20E-05    |
| ENSCAFG00000001596 | FOXP4      | 2.091095449  | 3.82E-06    |
| ENSCAFG00000001616 | KCP        | 1.85721633   | 0.00185992  |
| ENSCAFG00000001636 | PPP1R16A   | 1.031576931  | 0.000870891 |
| ENSCAFG00000001646 | PRUNE2     | 3.399318155  | 0.000239015 |
| ENSCAFG00000001649 | GCNT1      | 3.056173032  | 0.000239287 |
| ENSCAFG00000001672 | LEP        | 4.763085891  | 0.000210633 |
| ENSCAFG00000001705 | MB         | -1.547539764 | 0.013542253 |
| ENSCAFG00000001730 | GCC1       | 1.077616813  | 0.002673402 |
| ENSCAFG00000001793 | BTBD11     | 1.551643808  | 0.00653172  |
| ENSCAFG00000001840 | B4GALT1    | 1.027668154  | 0.008661043 |
| ENSCAFG00000001852 | ADAM22     | -1.374857717 | 0.025736584 |
| ENSCAFG00000001854 |            | -1.952007842 | 0.035660473 |
| ENSCAFG00000001875 | CKAP4      | 1.148824276  | 0.026289292 |
| ENSCAFG00000001885 | APPL2      | 1.239516258  | 0.000839671 |
| ENSCAFG00000001890 | MAMDC2     | 1.277191367  | 0.01643615  |
| ENSCAFG00000001897 | APBA1      | 1.215066888  | 0.019191295 |
| ENSCAFG00000001909 | KIF24      | 1.81716916   | 0.001685762 |
| ENSCAFG00000001923 | DNAI1      | 4.48304296   | 0.004636016 |
| ENSCAFG00000001966 | SH3RF3     | -1.927100824 | 0.002256998 |
| ENSCAFG00000001985 |            | 1.039690188  | 0.003086778 |
| ENSCAFG00000002040 | TFPI2      | -1.973603952 | 0.001865922 |
| ENSCAFG00000002042 |            | -1.440245533 | 0.010588672 |
| ENSCAFG00000002046 | GNG11      | -1.54744477  | 1.38E-05    |
| ENSCAFG00000002053 | RFX3       | 1.84761366   | 0.002658039 |
| ENSCAFG00000002057 | PDGFRA     | 1.118666213  | 0.040143448 |
| ENSCAFG00000002069 | COL1A2     | 2.925392536  | 8.69E-05    |
| ENSCAFG00000002079 | KDR        | -1.497427782 | 8.46E-05    |
| ENSCAFG00000002084 |            | 1.224256255  | 0.035327292 |
| ENSCAFG00000002098 | C10H2orf40 | -1.798114852 | 0.031979336 |
| ENSCAFG00000002105 | FHL2       | 1.817158446  | 0.044744006 |
| ENSCAFG00000002116 | PLGRKT     | -1.364684603 | 1.22E-05    |
| ENSCAFG00000002195 | SDHAF3     | -1.190357481 | 0.027855327 |
| ENSCAFG00000002230 |            | -1.660025677 | 0.001904885 |
| ENSCAFG00000002301 | ECM2       | 1.078459066  | 0.008406089 |

|                    |            |              |             |
|--------------------|------------|--------------|-------------|
| ENSCAFG00000002319 | KIAA1211L  | 3.749003388  | 3.44E-05    |
| ENSCAFG00000002330 | IGFBP7     | -1.749127525 | 8.46E-05    |
| ENSCAFG00000002358 | VWA3B      | 1.331704984  | 0.001510756 |
| ENSCAFG00000002365 | TMEM131    | 1.345509869  | 0.00024939  |
| ENSCAFG00000002420 | MEOX2      | -1.358391232 | 0.002282639 |
| ENSCAFG00000002432 | TSPAN13    | -1.704681942 | 7.09E-06    |
| ENSCAFG00000002498 | HDAC9      | 1.059230809  | 0.007135728 |
| ENSCAFG00000002517 |            | 1.346231484  | 0.001780718 |
| ENSCAFG00000002576 | HIVEP3     | 2.159868089  | 0.026518024 |
| ENSCAFG00000002606 |            | 1.539278061  | 0.002205048 |
| ENSCAFG00000002635 | RDH13      | -1.324156386 | 0.00894479  |
| ENSCAFG00000002645 | KCNQ5      | 1.674362122  | 5.51E-05    |
| ENSCAFG00000002656 | EEF1A1     | 1.242180023  | 0.002390132 |
| ENSCAFG00000002701 | TFPT       | -1.035921803 | 0.005092193 |
| ENSCAFG00000002728 | CDCA7L     | 1.028771214  | 0.008658095 |
| ENSCAFG00000002741 | MYO6       | 1.139662194  | 0.008117135 |
| ENSCAFG00000002748 |            | 1.362743224  | 0.001197956 |
| ENSCAFG00000002753 | GPNMB      | 2.20112516   | 0.008669705 |
| ENSCAFG00000002814 | KCNQ4      | 1.85384467   | 0.006646778 |
| ENSCAFG00000002822 | LCA5       | 1.228737831  | 0.025094462 |
| ENSCAFG00000002830 | RIMS3      | -3.512294484 | 1.20E-05    |
| ENSCAFG00000002837 | TMEM245    | 1.096738154  | 3.62E-05    |
| ENSCAFG00000002856 | CYCS       | -1.190275858 | 0.029410109 |
| ENSCAFG00000002919 | EFEMP1     | 1.429460589  | 0.013958762 |
| ENSCAFG00000002927 | CCDC85A    | -1.196861311 | 0.000163276 |
| ENSCAFG00000002948 | HOXA4      | 1.118026487  | 0.011069215 |
| ENSCAFG00000002974 | FAM71E1    | 1.844948802  | 0.005760653 |
| ENSCAFG00000002994 | NT5E       | 1.127540876  | 0.010707424 |
| ENSCAFG00000003000 | PTGR1      | 1.357704481  | 0.000917353 |
| ENSCAFG00000003008 | C11H9orf84 | 8.795896607  | 3.43E-05    |
| ENSCAFG00000003010 | UGCG       | 1.06033919   | 0.001411574 |
| ENSCAFG00000003087 |            | 1.422426202  | 0.007883458 |
| ENSCAFG00000003096 | PM20D2     | 1.866701978  | 0.000482124 |
| ENSCAFG00000003097 | CRHR2      | 1.886625788  | 0.039923614 |
| ENSCAFG00000003105 | ANKRD6     | 2.501267058  | 5.76E-06    |
| ENSCAFG00000003116 | BACH2      | 1.279358038  | 0.009349916 |
| ENSCAFG00000003233 | MEIS1      | 1.343509195  | 0.006184263 |
| ENSCAFG00000003255 | MANEAL     | -1.374321496 | 0.010033416 |
| ENSCAFG00000003268 | ARHGAP25   | -1.17964162  | 0.001913188 |
| ENSCAFG00000003290 | THAP5      | -1.072325058 | 0.000287464 |
| ENSCAFG00000003327 | COL27A1    | 2.318914477  | 0.018749267 |
| ENSCAFG00000003388 | SH3D21     | 1.934226217  | 0.000200634 |
| ENSCAFG00000003402 | CAV2       | -1.057265941 | 0.000332251 |
| ENSCAFG00000003404 | CAV1       | -1.018044877 | 0.006177844 |
| ENSCAFG00000003411 | EZH2       | 1.050304162  | 0.006129439 |
| ENSCAFG00000003465 | EGFR       | 1.208179465  | 0.013419578 |
| ENSCAFG00000003480 | STK17A     | -1.042565172 | 0.005661619 |
| ENSCAFG00000003530 |            | 1.771717875  | 9.60E-06    |
| ENSCAFG00000003564 |            | 1.015664287  | 0.031688118 |
| ENSCAFG00000003579 | GREB1      | -2.549157899 | 0.009208115 |



|                    |          |              |             |
|--------------------|----------|--------------|-------------|
| ENSCAFG00000003599 | ZMYM6    | -1.081855858 | 6.01E-05    |
| ENSCAFG00000003605 | GJA4     | -1.577907347 | 0.000881689 |
| ENSCAFG00000003620 | RCN3     | 1.179797714  | 0.008966859 |
| ENSCAFG00000003639 |          | -1.391141522 | 0.000557848 |
| ENSCAFG00000003676 |          | -1.074228768 | 0.008345026 |
| ENSCAFG00000003680 | MYLK3    | 4.790505736  | 3.28E-06    |
| ENSCAFG00000003700 | MAML3    | 1.498025774  | 0.040190266 |
| ENSCAFG00000003719 | RTN4IP1  | -1.03819734  | 0.010600613 |
| ENSCAFG00000003720 | NRCAM    | 4.283879136  | 3.64E-07    |
| ENSCAFG00000003775 | OSR1     | 2.733224827  | 6.01E-05    |
| ENSCAFG00000003797 |          | -1.387226614 | 0.001555274 |
| ENSCAFG00000003804 |          | 1.91604871   | 0.027291532 |
| ENSCAFG00000003810 | PPIL6    | 1.886156161  | 0.028278525 |
| ENSCAFG00000003816 | SMPD2    | 1.357520695  | 0.000567919 |
| ENSCAFG00000003824 | MICAL1   | 2.0767653    | 4.15E-06    |
| ENSCAFG00000003854 | WASF1    | 1.3667595    | 0.007760034 |
| ENSCAFG00000003887 | APOB     | 3.292067243  | 0.003179052 |
| ENSCAFG00000003907 | BRAF     | 1.00346522   | 0.000782651 |
| ENSCAFG00000003941 | SPATA6   | 1.418324303  | 0.020156672 |
| ENSCAFG00000003942 | REV3L    | 1.02376239   | 0.000720562 |
| ENSCAFG00000003960 | TRAF3IP2 | 1.576682143  | 0.044037897 |
| ENSCAFG00000003961 | SPHK2    | 1.195593731  | 0.000679054 |
| ENSCAFG00000004029 | TMEM143  | -1.175801443 | 0.043712144 |
| ENSCAFG00000004054 | HS3ST5   | -1.8084843   | 0.027277983 |
| ENSCAFG00000004087 | MAML2    | 1.005929179  | 0.036569253 |
| ENSCAFG00000004091 |          | -1.19180674  | 0.008485431 |
| ENSCAFG00000004124 |          | 1.144810094  | 0.031929765 |
| ENSCAFG00000004127 | SESN3    | 2.678404538  | 7.91E-05    |
| ENSCAFG00000004128 | BBS7     | 1.015902494  | 9.12E-05    |
| ENSCAFG00000004137 | AMOTL1   | 1.104107903  | 0.001302996 |
| ENSCAFG00000004176 | PANX1    | 2.078667435  | 0.001784746 |
| ENSCAFG00000004201 | SLC1A5   | 1.802754086  | 0.018149829 |
| ENSCAFG00000004232 | HS6ST1   | 1.082993043  | 1.17E-05    |
| ENSCAFG00000004274 | LRRC17   | 1.647593439  | 0.01369921  |
| ENSCAFG00000004297 | CCDC8    | 3.386229398  | 0.001407136 |
| ENSCAFG00000004300 | PNMA8A   | 1.023434874  | 0.028642719 |
| ENSCAFG00000004331 |          | 2.077663616  | 0.000552383 |
| ENSCAFG00000004334 | SELENOI  | 1.001921433  | 0.018102234 |
| ENSCAFG00000004366 | MAGI2    | 1.331128361  | 0.014361632 |
| ENSCAFG00000004374 | SOX9     | 2.155439117  | 0.002347172 |
| ENSCAFG00000004392 | DMPK     | 1.766780598  | 6.28E-05    |
| ENSCAFG00000004395 | FBXO46   | 1.24659206   | 0.003949637 |
| ENSCAFG00000004402 | PRSS23   | 1.458625327  | 0.001191717 |
| ENSCAFG00000004406 | FBLN2    | 1.336998079  | 0.010147288 |
| ENSCAFG00000004408 | CAB39L   | 1.10280487   | 0.020579231 |
| ENSCAFG00000004416 | GPR4     | -1.475342592 | 0.000438661 |
| ENSCAFG00000004421 | CDADC1   | -1.041150674 | 0.00962539  |
| ENSCAFG00000004454 | SUCLA2   | -1.026473486 | 0.012661488 |
| ENSCAFG00000004481 | SLC6A6   | 1.975231116  | 0.002518781 |
| ENSCAFG00000004492 | GRIP2    | 1.837638298  | 0.001284887 |

|                    |          |              |             |
|--------------------|----------|--------------|-------------|
| ENSCAFG00000004500 | SYTL2    | -1.06740374  | 0.00904852  |
| ENSCAFG00000004510 | CDC42EP4 | 1.211227012  | 0.009210795 |
| ENSCAFG00000004632 |          | -1.610486819 | 0.011053902 |
| ENSCAFG00000004634 |          | -1.248256843 | 0.02320903  |
| ENSCAFG00000004636 | BCAM     | 1.431501768  | 0.004542265 |
| ENSCAFG00000004639 | SUSD5    | 4.81671273   | 6.79E-06    |
| ENSCAFG00000004694 | PTCH2    | 1.286122088  | 0.037600146 |
| ENSCAFG00000004714 | FAM107B  | -1.183818488 | 0.024977367 |
| ENSCAFG00000004731 | TENM4    | 1.9804845    | 0.002295963 |
| ENSCAFG00000004746 | XRCC1    | 1.336406212  | 0.001164325 |
| ENSCAFG00000004769 | OPTN     | -1.512936657 | 0.011889457 |
| ENSCAFG00000004785 | IFT122   | 1.168932927  | 0.002855345 |
| ENSCAFG00000004801 | ASB10    | -1.42617755  | 0.025563651 |
| ENSCAFG00000004802 | KBTBD6   | 1.062898207  | 0.002315397 |
| ENSCAFG00000004820 | ITGA9    | 1.722472476  | 0.00240463  |
| ENSCAFG00000004834 | TMEM145  | 1.616226282  | 0.000482552 |
| ENSCAFG00000004916 | H3F3B    | 1.190683906  | 0.000275596 |
| ENSCAFG00000004931 | PLCD1    | 1.180200375  | 0.013188269 |
| ENSCAFG00000004956 | PAK1     | 1.300710136  | 0.012617338 |
| ENSCAFG00000004958 | ATP1A3   | -1.916108938 | 0.019185539 |
| ENSCAFG00000004991 | PPARG    | 1.436105852  | 0.033155165 |
| ENSCAFG00000005037 | KLF5     | 1.236429367  | 0.034166191 |
| ENSCAFG00000005051 | SCN5A    | 4.78620908   | 0.000164719 |
| ENSCAFG00000005069 | PTPRF    | 1.93251872   | 0.005101075 |
| ENSCAFG00000005081 | INSIG1   | -1.413172311 | 1.31E-07    |
| ENSCAFG00000005087 | TTC21A   | 1.209267143  | 0.027065942 |
| ENSCAFG00000005183 | SLAIN1   | 1.203853093  | 0.040575689 |
| ENSCAFG00000005212 | FOSL2    | 1.220354061  | 0.005349322 |
| ENSCAFG00000005217 | NCAPG2   | 1.145805385  | 0.027915043 |
| ENSCAFG00000005220 | SZT2     | 1.134297111  | 0.00087565  |
| ENSCAFG00000005252 | TMC6     | -1.050384564 | 0.028550261 |
| ENSCAFG00000005255 | VIPR2    | -2.04118437  | 3.36E-05    |
| ENSCAFG00000005294 | TK1      | 1.370300308  | 0.020792332 |
| ENSCAFG00000005301 | PSD3     | 2.372101143  | 0.005769671 |
| ENSCAFG00000005348 | EHD3     | 1.844069921  | 0.025868063 |
| ENSCAFG00000005362 | PLD3     | 1.089200362  | 0.000696313 |
| ENSCAFG00000005365 | DGAT2    | 4.492214841  | 0.000470021 |
| ENSCAFG00000005404 | TEP1     | 1.235119406  | 0.000380719 |
| ENSCAFG00000005411 | OSBPL10  | 1.87899972   | 4.04E-05    |
| ENSCAFG00000005433 | ABCC4    | -1.235849924 | 0.006665142 |
| ENSCAFG00000005474 | TPPP2    | -1.347649924 | 0.024591742 |
| ENSCAFG00000005530 | ZFP36    | 1.435011212  | 0.009107289 |
| ENSCAFG00000005542 | C1QTNF1  | 1.362450268  | 0.004711636 |
| ENSCAFG00000005560 | FLRT3    | 1.63279373   | 0.004456929 |
| ENSCAFG00000005564 | UCP2     | 1.582672682  | 9.22E-05    |
| ENSCAFG00000005671 | LRR3B    | -3.502442338 | 0.003636318 |
| ENSCAFG00000005693 | MZB1     | 2.554785651  | 0.002654434 |
| ENSCAFG00000005701 | MEMO1    | -1.32766682  | 0.00167927  |
| ENSCAFG00000005723 | PSD2     | 2.10650051   | 0.022231663 |
| ENSCAFG00000005746 | NAV3     | 1.370701686  | 0.046737046 |

|                    |          |              |             |
|--------------------|----------|--------------|-------------|
| ENSCAFG00000005767 | PDE6G    | -1.793437916 | 0.042789501 |
| ENSCAFG00000005812 |          | -1.031260912 | 0.048377229 |
| ENSCAFG00000005839 | SATB1    | -1.232135107 | 4.92E-05    |
| ENSCAFG00000005846 | GCGR     | 1.038683765  | 0.02127341  |
| ENSCAFG00000005851 |          | -1.208214466 | 0.023324469 |
| ENSCAFG00000005853 | PPP1R27  | -1.354830188 | 0.002040457 |
| ENSCAFG00000005870 | RASGRP3  | -1.037928066 | 0.006629522 |
| ENSCAFG00000005940 | THSD1    | -1.07328846  | 0.003198475 |
| ENSCAFG00000005960 | LRRN1    | 1.468728589  | 0.018858074 |
| ENSCAFG00000005963 | METTL21C | -4.337630234 | 0.013432947 |
| ENSCAFG00000005965 | FOXO1    | 1.342420559  | 0.014760008 |
| ENSCAFG00000006006 | FASN     | 1.832543195  | 0.002831356 |
| ENSCAFG00000006019 | FREM2    | 1.997135963  | 0.001709181 |
| ENSCAFG00000006022 | EFNB2    | -1.149158656 | 0.00578441  |
| ENSCAFG00000006035 | COL6A6   | 1.373634224  | 0.039451868 |
| ENSCAFG00000006044 | TRPC4    | 1.852366958  | 0.038224436 |
| ENSCAFG00000006052 | RASSF2   | 1.182605057  | 0.033316008 |
| ENSCAFG00000006053 |          | 2.410434605  | 0.000370765 |
| ENSCAFG00000006065 | PRNP     | 1.082986098  | 0.017010501 |
| ENSCAFG00000006086 | PCDHGC5  | 1.034747068  | 0.038947382 |
| ENSCAFG00000006091 | KITLG    | -1.901165541 | 3.12E-13    |
| ENSCAFG00000006100 | DUSP6    | -1.160219218 | 0.000193285 |
| ENSCAFG00000006106 | PCDHB4   | 1.660172265  | 0.029660155 |
| ENSCAFG00000006162 | SMAD9    | 1.642648071  | 0.000366957 |
| ENSCAFG00000006164 | CYP1B1   | 2.486019772  | 0.003558567 |
| ENSCAFG00000006166 |          | -1.312823244 | 0.044772843 |
| ENSCAFG00000006175 | CDC25B   | 1.356247088  | 0.010062323 |
| ENSCAFG00000006215 | POLE     | 1.049985134  | 0.011285828 |
| ENSCAFG00000006231 | DCLK1    | 3.592784876  | 7.82E-06    |
| ENSCAFG00000006234 | ADAM33   | 1.268971644  | 0.015891661 |
| ENSCAFG00000006237 | ACPP     | -1.000504313 | 0.040736556 |
| ENSCAFG00000006250 | SPRY4    | -1.233853027 | 0.004228894 |
| ENSCAFG00000006255 | NBEA     | 1.20256109   | 0.000130403 |
| ENSCAFG00000006264 | PCLO     | 2.615201321  | 0.000357765 |
| ENSCAFG00000006334 | GRTP1    | -1.258628281 | 0.026256716 |
| ENSCAFG00000006381 | SEMA3C   | 1.038521177  | 0.008217059 |
| ENSCAFG00000006392 | ACKR4    | -2.278077277 | 0.026652151 |
| ENSCAFG00000006403 |          | -1.129692789 | 0.034741074 |
| ENSCAFG00000006417 | LZTS3    | -1.088584657 | 0.000948527 |
| ENSCAFG00000006421 | GAS6     | -1.009584253 | 0.003697056 |
| ENSCAFG00000006424 | GXYLT2   | 1.741229308  | 0.000541357 |
| ENSCAFG00000006513 |          | -1.689503788 | 0.021957341 |
| ENSCAFG00000006528 | RASSF7   | 1.720814154  | 0.009060634 |
| ENSCAFG00000006545 |          | -1.255296155 | 0.006582855 |
| ENSCAFG00000006559 | ITPRIPL1 | -1.397851669 | 0.000138061 |
| ENSCAFG00000006563 | EOGT     | -1.053095061 | 0.007320513 |
| ENSCAFG00000006576 | WDFY4    | 1.46324069   | 0.00408773  |
| ENSCAFG00000006607 | DPYSL3   | 2.131571556  | 0.009238841 |
| ENSCAFG00000006608 | CPXM1    | 2.635647338  | 0.015315864 |
| ENSCAFG00000006612 | SUCLG2   | -1.180146674 | 0.000610345 |

|                   |          |              |             |
|-------------------|----------|--------------|-------------|
| ENSCAFG0000006673 | PPP1R3B  | 1.184983714  | 0.024626194 |
| ENSCAFG0000006701 | FLT1     | -1.270143319 | 0.000428565 |
| ENSCAFG0000006723 | SYT9     | 1.245544428  | 0.008990229 |
| ENSCAFG0000006740 | OLFML1   | 1.537237483  | 0.00353556  |
| ENSCAFG0000006745 | PRAG1    | -1.189785906 | 0.024248053 |
| ENSCAFG0000006785 |          | 1.079482911  | 0.04280166  |
| ENSCAFG0000006800 | FZD10    | 1.550658639  | 0.000939887 |
| ENSCAFG0000006804 | PRICKLE2 | 1.04935904   | 0.013934497 |
| ENSCAFG0000006825 | PRR5L    | 2.72886625   | 0.014915091 |
| ENSCAFG0000006840 | LDLRAD3  | 1.386681603  | 0.022896437 |
| ENSCAFG0000006877 | FAM110A  | 1.963890232  | 1.43E-05    |
| ENSCAFG0000006898 | PDHX     | -1.364981399 | 0.011611732 |
| ENSCAFG0000006909 | LMO1     | -1.613763672 | 0.001759839 |
| ENSCAFG0000006930 | TCF15    | -1.553303222 | 0.000161889 |
| ENSCAFG0000006953 | PDGFRL   | 1.100093006  | 0.00622266  |
| ENSCAFG0000006977 | ABTB2    | 1.099258098  | 0.007672371 |
| ENSCAFG0000007036 | CD22     | -1.719470343 | 0.001095637 |
| ENSCAFG0000007045 |          | -1.336876842 | 0.000359083 |
| ENSCAFG0000007079 |          | 1.403281674  | 0.0018381   |
| ENSCAFG0000007082 |          | -2.209785115 | 0.005818422 |
| ENSCAFG0000007261 | ACOX2    | -1.488637855 | 0.022786194 |
| ENSCAFG0000007307 |          | 2.22591806   | 0.013894905 |
| ENSCAFG0000007394 | ABHD6    | -1.190132732 | 0.008254598 |
| ENSCAFG0000007407 |          | 2.660916631  | 0.008270021 |
| ENSCAFG0000007433 | LRP3     | 1.154106235  | 0.016645878 |
| ENSCAFG0000007440 | WDR88    | 4.275295211  | 0.004044658 |
| ENSCAFG0000007453 | KRCC1    | -1.201082411 | 9.38E-06    |
| ENSCAFG0000007486 | CEP89    | 1.428140706  | 6.87E-05    |
| ENSCAFG0000007562 | AMPD3    | 1.849416153  | 0.01014497  |
| ENSCAFG0000007596 | SLC25A4  | -1.210582853 | 0.030785289 |
| ENSCAFG0000007626 | PIK3R1   | 1.067000994  | 0.005057473 |
| ENSCAFG0000007635 | CLSTN2   | 3.207811607  | 1.16E-05    |
| ENSCAFG0000007651 | DTX4     | 1.542997297  | 0.016897439 |
| ENSCAFG0000007653 | ST3GAL5  | 1.573265873  | 0.008203869 |
| ENSCAFG0000007674 | RASA2    | 1.549880689  | 0.007633551 |
| ENSCAFG0000007681 | MFAP3L   | -1.191804083 | 0.000412873 |
| ENSCAFG0000007698 | ZNF827   | 1.181551204  | 0.003497718 |
| ENSCAFG0000007742 | TFDP2    | -1.002106629 | 0.001754311 |
| ENSCAFG0000007750 | CASP3    | 1.769901389  | 0.001471164 |
| ENSCAFG0000007754 | USP47    | -1.090333298 | 3.92E-05    |
| ENSCAFG0000007789 | ARHGAP10 | 1.021474237  | 0.00022129  |
| ENSCAFG0000007805 | OCLN     | -1.073577429 | 0.005938372 |
| ENSCAFG0000007832 | TCF7L1   | 1.147972872  | 0.006259848 |
| ENSCAFG0000007845 | DKK3     | -1.71331393  | 0.022033743 |
| ENSCAFG0000007846 | GBE1     | 1.149584014  | 0.025409592 |
| ENSCAFG0000007847 | TIMM10   | -1.591285768 | 8.16E-05    |
| ENSCAFG0000007860 | CSRNP2   | 1.049811291  | 0.010671638 |
| ENSCAFG0000007863 | ATR      | 1.088782499  | 4.59E-05    |
| ENSCAFG0000007888 | FFAR4    | 2.491315087  | 0.024760419 |
| ENSCAFG0000007893 | RBP4     | 2.002499185  | 0.042251832 |

|                   |             |              |             |
|-------------------|-------------|--------------|-------------|
| ENSCAFG0000007935 | TRPC1       | 1.051945866  | 0.002529282 |
| ENSCAFG0000007945 | PROCR       | 2.330769255  | 2.51E-10    |
| ENSCAFG0000007958 | APLNR       | -1.261332147 | 0.023264241 |
| ENSCAFG0000008028 | SLC9A9      | 1.345211158  | 0.008270911 |
| ENSCAFG0000008062 |             | -1.837269893 | 0.001471419 |
| ENSCAFG0000008063 |             | 1.368933819  | 0.0337881   |
| ENSCAFG0000008159 | PLSCR4      | 1.298203627  | 0.015221206 |
| ENSCAFG0000008164 | TMEM154     | 1.779635354  | 0.011733878 |
| ENSCAFG0000008214 | FHDC1       | 2.895963842  | 4.49E-05    |
| ENSCAFG0000008235 | CPA3        | 2.074229077  | 0.012324675 |
| ENSCAFG0000008256 | RBM12       | 1.18236141   | 8.75E-05    |
| ENSCAFG0000008269 | IL17RB      | -1.120966948 | 0.024398246 |
| ENSCAFG0000008293 | FZD3        | 1.065455904  | 0.0137963   |
| ENSCAFG0000008295 | BTG3        | 1.295858635  | 0.025828207 |
| ENSCAFG0000008296 | CHDH        | -1.173643235 | 0.009088829 |
| ENSCAFG0000008309 |             | -1.43440908  | 0.023136322 |
| ENSCAFG0000008319 | CHODL       | 1.172802739  | 0.016936748 |
| ENSCAFG0000008325 | TM4SF18     | -1.18487751  | 0.037090212 |
| ENSCAFG0000008342 | AGBL2       | 1.945630527  | 0.000652549 |
| ENSCAFG0000008343 | TM4SF1      | -1.140917171 | 0.024735774 |
| ENSCAFG0000008354 | SCARA5      | 1.430062668  | 0.012793785 |
| ENSCAFG0000008391 | HEY1        | -1.008243771 | 0.018293645 |
| ENSCAFG0000008403 |             | -1.495917373 | 0.01247696  |
| ENSCAFG0000008408 | TPD52       | 1.207662589  | 0.014042884 |
| ENSCAFG0000008413 | EPB41L1     | 1.291370076  | 0.008869034 |
| ENSCAFG0000008471 | CCDC142     | 1.34579187   | 0.037734356 |
| ENSCAFG0000008477 | BLNK        | -1.511547355 | 0.032220078 |
| ENSCAFG0000008503 |             | 1.088891507  | 0.023027303 |
| ENSCAFG0000008566 | GUCY1B1     | -1.117284236 | 0.02654305  |
| ENSCAFG0000008597 | ANGPT2      | -2.09122585  | 7.91E-06    |
| ENSCAFG0000008624 | STBD1       | -1.132732768 | 0.039550272 |
| ENSCAFG0000008648 |             | -1.585472155 | 0.004893517 |
| ENSCAFG0000008707 | CKMT2       | -1.513175637 | 0.014869607 |
| ENSCAFG0000008709 | CCDC102A    | -1.009151305 | 1.13E-05    |
| ENSCAFG0000008728 | TET3        | 1.074996219  | 0.020416875 |
| ENSCAFG0000008741 | EPHA3       | -1.457587703 | 0.034203901 |
| ENSCAFG0000008755 | SRC         | 1.483256891  | 0.012127056 |
| ENSCAFG0000008761 | CX3CL1      | -1.631523824 | 0.002692642 |
| ENSCAFG0000008786 | NNAT        | 1.385895771  | 0.017606039 |
| ENSCAFG0000008837 | ANXA3       | -1.724798275 | 0.000125438 |
| ENSCAFG0000008942 | C18H11orf49 | 1.771409836  | 9.50E-06    |
| ENSCAFG0000008977 | LRP4        | 2.637229703  | 4.82E-08    |
| ENSCAFG0000008979 | TMEM150C    | -2.122919049 | 7.42E-08    |
| ENSCAFG0000009005 | CYP26B1     | 6.304114224  | 6.45E-10    |
| ENSCAFG0000009006 | GFM1        | -1.005082533 | 0.002329285 |
| ENSCAFG0000009017 | PPP1R16B    | -1.166128412 | 0.036064706 |
| ENSCAFG0000009026 | NECAB1      | 1.914034765  | 0.004750324 |
| ENSCAFG0000009046 | TPCN1       | 1.026898343  | 0.008569566 |
| ENSCAFG0000009061 | SLC8B1      | 1.213167326  | 0.004684416 |
| ENSCAFG0000009066 | MYOD1       | 1.704728854  | 0.029840809 |

|                   |            |              |             |
|-------------------|------------|--------------|-------------|
| ENSCAFG0000009074 | HOMER1     | -1.107945461 | 0.002120783 |
| ENSCAFG0000009076 | PLBD2      | 2.689637486  | 2.48E-07    |
| ENSCAFG0000009097 | SDSL       | 3.973724233  | 1.31E-07    |
| ENSCAFG0000009110 | MT1E       | 1.684552853  | 0.022942676 |
| ENSCAFG0000009113 |            | 1.662637003  | 0.048575535 |
| ENSCAFG0000009149 | SMIM4      | -1.368540285 | 0.032207007 |
| ENSCAFG0000009232 | AMIGO2     | 1.688808515  | 0.013372996 |
| ENSCAFG0000009271 | CRTAC1     | 2.277882249  | 0.002322052 |
| ENSCAFG0000009282 | CREB3L1    | 2.490627371  | 0.001186478 |
| ENSCAFG0000009333 | CES1       | -2.376497003 | 0.001251065 |
| ENSCAFG0000009337 | TUBB2A     | 3.250224395  | 1.47E-05    |
| ENSCAFG0000009358 | ASNSD1     | -1.144529659 | 0.001513926 |
| ENSCAFG0000009362 | IGSF22     | 8.547874465  | 0.003449753 |
| ENSCAFG0000009389 | NISCH      | 1.016720573  | 0.006632477 |
| ENSCAFG0000009395 | SLC6A2     | -1.919396586 | 0.008599789 |
| ENSCAFG0000009401 | DLL4       | -1.523832158 | 0.000129353 |
| ENSCAFG0000009414 | CHAC1      | 6.469882148  | 0.00023368  |
| ENSCAFG0000009423 | C29H&orf37 | 1.392089379  | 0.004122074 |
| ENSCAFG0000009433 | BAZ2B      | 1.077247347  | 0.01016707  |
| ENSCAFG0000009441 | CD82       | 1.055301224  | 0.043230122 |
| ENSCAFG0000009447 |            | -1.270937746 | 0.014171472 |
| ENSCAFG0000009510 | EXD1       | 1.073223851  | 0.018392605 |
| ENSCAFG0000009546 | SLC5A3     | -1.216509949 | 0.029699281 |
| ENSCAFG0000009552 | IMPG2      | 1.04363922   | 0.026205072 |
| ENSCAFG0000009570 | DSP        | -2.147769814 | 0.042939147 |
| ENSCAFG0000009596 | RUNX1      | 2.563379593  | 0.012764049 |
| ENSCAFG0000009638 | ABCG2      | 1.03213045   | 0.033390791 |
| ENSCAFG0000009641 | PI3        | 4.966087179  | 0.0139996   |
| ENSCAFG0000009653 | DOP1B      | 2.080276665  | 0.011485096 |
| ENSCAFG0000009659 | HR         | 1.976192906  | 0.027128185 |
| ENSCAFG0000009663 | SCD        | 1.467497752  | 0.005905574 |
| ENSCAFG0000009673 |            | -1.451656986 | 0.000133089 |
| ENSCAFG0000009680 | GCNT2      | -1.212452645 | 0.003150768 |
| ENSCAFG0000009708 |            | 1.326485815  | 0.002304302 |
| ENSCAFG0000009717 | DNAH1      | 1.797251164  | 0.01882807  |
| ENSCAFG0000009721 | ALCAM      | 1.134756465  | 0.039295402 |
| ENSCAFG0000009735 | PLA2G4B    | 2.734643432  | 0.000289169 |
| ENSCAFG0000009744 | ADAMTS20   | 1.271793398  | 0.000597472 |
| ENSCAFG0000009765 | CASQ2      | 1.110948256  | 0.023375595 |
| ENSCAFG0000009777 | NAV2       | 2.360013976  | 7.44E-05    |
| ENSCAFG0000009781 | HERC6      | 1.24440049   | 0.001346425 |
| ENSCAFG0000009820 | NOS1       | -2.121300616 | 0.023904112 |
| ENSCAFG0000009840 | FAM13A     | 1.110540351  | 0.013996989 |
| ENSCAFG0000009869 | EHD4       | 1.260345827  | 0.014855076 |
| ENSCAFG0000009881 | ALAS1      | -1.544686968 | 0.002904226 |
| ENSCAFG0000009912 | ERG        | -1.034168396 | 0.001860039 |
| ENSCAFG0000009938 | TENT4B     | -1.119489303 | 0.003678487 |
| ENSCAFG0000009951 | SPAG17     | 7.642547816  | 1.46E-06    |
| ENSCAFG0000009961 | ADAMTS15   | 1.937195182  | 0.001201022 |
| ENSCAFG0000009978 | ETS2       | 1.883296077  | 3.39E-07    |

|                    |            |              |             |
|--------------------|------------|--------------|-------------|
| ENSCAFG00000010049 | GFRA2      | 1.471557592  | 0.022028051 |
| ENSCAFG00000010090 | IGF2       | 3.240827274  | 1.30E-05    |
| ENSCAFG00000010111 | NIPSNAP2   | -1.105617086 | 0.008220459 |
| ENSCAFG00000010121 | CD81       | 1.393565596  | 4.59E-06    |
| ENSCAFG00000010131 | GBF1       | 1.176656593  | 0.002586937 |
| ENSCAFG00000010148 | SLC45A3    | 4.63220527   | 2.36E-05    |
| ENSCAFG00000010151 | NHLRC1     | -1.053782232 | 0.026699878 |
| ENSCAFG00000010175 | CDH22      | -1.376839677 | 0.019541391 |
| ENSCAFG00000010202 |            | -1.183433224 | 0.044776213 |
| ENSCAFG00000010225 | PHKB       | -1.025976526 | 0.003741546 |
| ENSCAFG00000010239 | IKBKE      | 1.242696351  | 0.032746758 |
| ENSCAFG00000010254 | SFXN2      | 2.064374068  | 0.000259649 |
| ENSCAFG00000010264 | WBP1L      | 1.075959557  | 0.001791183 |
| ENSCAFG00000010274 | CHI3L1     | 5.489696854  | 0.000369718 |
| ENSCAFG00000010284 | GPLD1      | -1.389582331 | 0.036662501 |
| ENSCAFG00000010285 | ABCG1      | 2.572418504  | 0.000350336 |
| ENSCAFG00000010288 | MYBPH      | 5.729872752  | 5.01E-05    |
| ENSCAFG00000010290 |            | 1.127323694  | 0.012905004 |
| ENSCAFG00000010292 | DOCK10     | 1.560065049  | 0.019819148 |
| ENSCAFG00000010298 | ADORA1     | 3.527204208  | 2.11E-05    |
| ENSCAFG00000010304 | ETS1       | -1.325434595 | 0.000238081 |
| ENSCAFG00000010309 | MYOG       | 1.52088885   | 0.009245696 |
| ENSCAFG00000010395 | ADAMTS16   | 2.267385236  | 0.042507845 |
| ENSCAFG00000010423 | COL4A4     | 2.911724806  | 3.71E-08    |
| ENSCAFG00000010426 | COL4A3     | 3.91461618   | 1.36E-12    |
| ENSCAFG00000010432 | TIRAP      | -1.129563795 | 0.00029239  |
| ENSCAFG00000010526 | FIGN       | 1.455917216  | 0.003215102 |
| ENSCAFG00000010530 | CCDC80     | 1.597960741  | 0.001284061 |
| ENSCAFG00000010588 | MARCKSL1   | 1.800448811  | 0.022793028 |
| ENSCAFG00000010602 | ELF3       | 6.224700143  | 1.17E-06    |
| ENSCAFG00000010619 | BICD1      | 2.088271111  | 0.002232276 |
| ENSCAFG00000010640 | SLC2A10    | 1.190300409  | 0.045304033 |
| ENSCAFG00000010652 | STK17B     | 1.15020727   | 0.029263679 |
| ENSCAFG00000010654 | AGPAT3     | -1.181973406 | 0.002425076 |
| ENSCAFG00000010656 | FAM167B    | 1.57858212   | 0.003504725 |
| ENSCAFG00000010698 | LTO1       | -1.016421776 | 0.00076533  |
| ENSCAFG00000010700 | CCND1      | -1.311346692 | 0.032616124 |
| ENSCAFG00000010752 | C25H2orf72 | -1.824929794 | 0.007534969 |
| ENSCAFG00000010758 | MAP2K6     | 1.574037058  | 0.008174431 |
| ENSCAFG00000010790 | SLC9B1     | 2.992770305  | 0.001611879 |
| ENSCAFG00000010798 | TNNT2      | 3.137959501  | 0.003047652 |
| ENSCAFG00000010815 | TGFB2      | 1.494601518  | 0.003902591 |
| ENSCAFG00000010825 |            | 3.396236737  | 0.003492806 |
| ENSCAFG00000010829 |            | 6.069163529  | 0.000844402 |
| ENSCAFG00000010840 | ADRA2A     | 2.027886781  | 0.016477477 |
| ENSCAFG00000010877 | ABCA9      | 1.163571591  | 0.009129961 |
| ENSCAFG00000010891 | PGPEP1L    | 1.114772082  | 0.020040164 |
| ENSCAFG00000010895 |            | 1.53235375   | 0.013965625 |
| ENSCAFG00000010923 | HIST1H1C   | 1.473932341  | 0.000325281 |
| ENSCAFG00000010925 | HFE        | 1.131300724  | 0.008973576 |

|                    |            |              |             |
|--------------------|------------|--------------|-------------|
| ENSCAFG00000010931 | GTPBP6     | -1.156443542 | 0.009157401 |
| ENSCAFG00000010936 | NPNT       | 2.260581185  | 0.005488884 |
| ENSCAFG00000010942 | CCDC91     | -1.22278308  | 0.001865045 |
| ENSCAFG00000010977 | TIMMDC1    | -1.013064484 | 0.005838218 |
| ENSCAFG00000010982 | FAM20A     | 1.327735982  | 0.004298893 |
| ENSCAFG00000010988 | CFAP410    | 1.201302105  | 7.94E-05    |
| ENSCAFG00000011000 | C37H2orf69 | -1.205066002 | 0.00503365  |
| ENSCAFG00000011046 | BCL9       | 1.312872289  | 0.001013329 |
| ENSCAFG00000011067 | DHRX       | -1.02456993  | 0.011727614 |
| ENSCAFG00000011069 | GJA5       | -1.76094913  | 0.000940751 |
| ENSCAFG00000011086 | SLC16A6    | 3.216273919  | 0.002852035 |
| ENSCAFG00000011087 | DKK2       | 2.016657527  | 0.00841529  |
| ENSCAFG00000011089 | ARNTL2     | 2.423575888  | 0.026410767 |
| ENSCAFG00000011107 | STK32C     | -2.1379274   | 0.003829866 |
| ENSCAFG00000011113 | GYG2       | 2.842135071  | 0.046644226 |
| ENSCAFG00000011147 | ESAM       | -1.075205388 | 0.001215541 |
| ENSCAFG00000011197 | MMP14      | 1.485559569  | 0.0092262   |
| ENSCAFG00000011227 | PRSS56     | 4.820232274  | 0.000758261 |
| ENSCAFG00000011283 | CHRND      | 4.316764066  | 0.001712996 |
| ENSCAFG00000011356 | VWA5A      | 1.359952119  | 0.0390231   |
| ENSCAFG00000011368 |            | 1.480762529  | 0.011863031 |
| ENSCAFG00000011378 | ANKRD34A   | 1.637426544  | 0.027794058 |
| ENSCAFG00000011426 | PTGIS      | 2.00997258   | 0.003542429 |
| ENSCAFG00000011432 | MAPKAPK2   | -1.027462576 | 0.000238795 |
| ENSCAFG00000011489 | AMT        | 1.421224363  | 0.000193361 |
| ENSCAFG00000011513 | ABLIM1     | 1.73670291   | 0.026136008 |
| ENSCAFG00000011524 | PTPRU      | 2.453559333  | 0.002965023 |
| ENSCAFG00000011532 | EGF        | 1.47127452   | 0.005762823 |
| ENSCAFG00000011533 | TARBP1     | 1.065472211  | 0.000131968 |
| ENSCAFG00000011534 | ACAN       | -4.36642322  | 0.002820702 |
| ENSCAFG00000011584 | GRAMD1B    | 1.398465266  | 0.011439968 |
| ENSCAFG00000011603 | GRK3       | -1.391952979 | 0.00135187  |
| ENSCAFG00000011605 | EFS        | 1.922066237  | 0.000698606 |
| ENSCAFG00000011637 | IQCB1      | 1.003506048  | 0.001391803 |
| ENSCAFG00000011646 | ZFH2       | 1.3352936    | 0.005329075 |
| ENSCAFG00000011652 | MTMR11     | 1.707003892  | 0.008577743 |
| ENSCAFG00000011662 | PRPS2      | -1.216500408 | 0.033737154 |
| ENSCAFG00000011744 | LAMB2      | 1.91057833   | 2.00E-05    |
| ENSCAFG00000011772 | EGLN1      | -1.064307644 | 0.000244409 |
| ENSCAFG00000011823 | MN1        | 1.711449202  | 0.000564741 |
| ENSCAFG00000011849 | TTC28      | 1.030172217  | 0.034679385 |
| ENSCAFG00000011911 | COL6A1     | 1.170613861  | 0.017102371 |
| ENSCAFG00000011915 |            | 1.166636411  | 0.010333181 |
| ENSCAFG00000011929 | CLK1       | 1.02530789   | 0.013826706 |
| ENSCAFG00000011952 |            | -1.286892757 | 0.014651859 |
| ENSCAFG00000011977 | KIF7       | 1.308554994  | 0.000142129 |
| ENSCAFG00000011986 | PLIN1      | 3.405953065  | 0.006111997 |
| ENSCAFG00000012013 | ANPEP      | 1.834642459  | 0.007660245 |
| ENSCAFG00000012022 |            | 1.693305698  | 0.0025583   |
| ENSCAFG00000012065 | PCK1       | 3.931907027  | 0.002848128 |



|                    |          |              |             |
|--------------------|----------|--------------|-------------|
| ENSCAFG00000012068 | AGT      | 3.307821786  | 0.012924073 |
| ENSCAFG00000012082 | SEMA4B   | 1.228537847  | 0.023335708 |
| ENSCAFG00000012085 | ABCC5    | 2.401646517  | 0.000179174 |
| ENSCAFG00000012095 | AHDC1    | 1.437749831  | 1.51E-06    |
| ENSCAFG00000012098 | PGBD5    | -1.591822883 | 0.020880289 |
| ENSCAFG00000012102 | SFXN4    | -1.131935957 | 0.000627187 |
| ENSCAFG00000012152 | GABBR1   | 1.544143648  | 0.001274261 |
| ENSCAFG00000012181 | ACTC1    | 3.772649425  | 0.010254741 |
| ENSCAFG00000012182 | TGM1     | 3.044524665  | 5.70E-06    |
| ENSCAFG00000012222 |          | 1.352016222  | 0.002434643 |
| ENSCAFG00000012286 | STRADB   | -1.203879649 | 0.006924966 |
| ENSCAFG00000012290 | SFN      | 1.462504245  | 0.004334308 |
| ENSCAFG00000012306 | SPTBN2   | -1.086731937 | 0.021915638 |
| ENSCAFG00000012328 | PRSS12   | 1.247157735  | 0.005394858 |
| ENSCAFG00000012333 | PPP1R3D  | -1.292859347 | 0.023474448 |
| ENSCAFG00000012345 | SEC24D   | 1.21464725   | 0.032736648 |
| ENSCAFG00000012376 | VASH2    | 2.084699386  | 0.003572492 |
| ENSCAFG00000012385 | BLM      | 1.504948461  | 0.008381999 |
| ENSCAFG00000012405 | RBM14    | 1.043224607  | 0.002512687 |
| ENSCAFG00000012428 | HES6     | 1.36513027   | 0.041069199 |
| ENSCAFG00000012449 | USP53    | 1.7655839    | 6.49E-07    |
| ENSCAFG00000012460 | SMYD2    | -1.16803138  | 0.00614654  |
| ENSCAFG00000012473 | SEMA6C   | 1.045690181  | 0.000233906 |
| ENSCAFG00000012517 | TMOD4    | -1.118371009 | 0.02020104  |
| ENSCAFG00000012525 | MUC13    | 3.62251399   | 0.006464476 |
| ENSCAFG00000012558 |          | 1.046927218  | 0.003719884 |
| ENSCAFG00000012619 | MGST1    | 2.512004864  | 0.03228505  |
| ENSCAFG00000012623 | STX1A    | 1.202019248  | 0.034886458 |
| ENSCAFG00000012661 | RFX5     | 1.075017609  | 0.002753632 |
| ENSCAFG00000012685 | PLXNB1   | 1.877043947  | 4.78E-05    |
| ENSCAFG00000012708 | SMARCD2  | 1.022505923  | 3.35E-05    |
| ENSCAFG00000012709 | GATA5    | 1.804033874  | 0.021097727 |
| ENSCAFG00000012716 | ARHGAP30 | 1.087262992  | 0.005409337 |
| ENSCAFG00000012742 | MTFP1    | -1.929641457 | 0.012633578 |
| ENSCAFG00000012748 | LHPP     | 1.007883176  | 0.011967461 |
| ENSCAFG00000012803 | RIN1     | 3.155806278  | 1.42E-06    |
| ENSCAFG00000012824 | SCN4B    | -1.59412924  | 0.002692617 |
| ENSCAFG00000012829 | TMPRSS4  | -2.176554135 | 0.04555644  |
| ENSCAFG00000012834 | SLC35E4  | 1.279877824  | 0.000202196 |
| ENSCAFG00000012904 | CDK1     | 1.762730567  | 0.001338037 |
| ENSCAFG00000012915 | BTNL9    | -1.015357318 | 0.006765806 |
| ENSCAFG00000012918 | TNK2     | 1.596658563  | 0.000130438 |
| ENSCAFG00000012925 | PHKA2    | 1.382655474  | 0.032619048 |
| ENSCAFG00000012952 | VPS37D   | 2.081263489  | 0.002561229 |
| ENSCAFG00000012963 |          | 1.084637453  | 0.034016937 |
| ENSCAFG00000013011 | PDE8A    | -1.165578579 | 0.000121594 |
| ENSCAFG00000013012 | THAP4    | -1.020061609 | 0.021456515 |
| ENSCAFG00000013020 | STMN3    | 1.497662067  | 0.027657812 |
| ENSCAFG00000013030 | PDHA1    | -1.282630014 | 0.023753027 |
| ENSCAFG00000013039 | ZNF365   | -1.070865273 | 0.005457647 |

|                    |            |              |             |
|--------------------|------------|--------------|-------------|
| ENSCAFG00000013221 |            | -1.104588923 | 0.023459795 |
| ENSCAFG00000013256 | MRC2       | 1.08775639   | 0.044373466 |
| ENSCAFG00000013278 |            | 2.045823956  | 0.013895827 |
| ENSCAFG00000013283 | CHRNA1     | 3.815468255  | 3.47E-05    |
| ENSCAFG00000013297 | IGF2BP2    | 1.430996439  | 0.002109281 |
| ENSCAFG00000013305 | DNAJC12    | -1.329968266 | 0.020555191 |
| ENSCAFG00000013322 | APOC3      | -2.511748825 | 7.58E-05    |
| ENSCAFG00000013353 | MGST3      | -1.316771749 | 0.022345483 |
| ENSCAFG00000013367 | HIP1       | 1.450538768  | 0.002978759 |
| ENSCAFG00000013368 | APOD       | -1.665651682 | 0.006079384 |
| ENSCAFG00000013394 | CXHXorf58  | -1.24322466  | 0.030126721 |
| ENSCAFG00000013423 | FUOM       | -2.263366815 | 1.50E-05    |
| ENSCAFG00000013427 | CALY       | -2.579974164 | 0.004686548 |
| ENSCAFG00000013483 | TMEM120A   | -1.405061093 | 7.87E-05    |
| ENSCAFG00000013489 | UCK2       | 1.936783208  | 3.27E-06    |
| ENSCAFG00000013496 |            | -1.280655828 | 0.001513844 |
| ENSCAFG00000013515 |            | -1.222080428 | 0.028528991 |
| ENSCAFG00000013521 | POLA1      | 1.384198517  | 3.01E-05    |
| ENSCAFG00000013600 | PTH1R      | 1.231973459  | 0.022990657 |
| ENSCAFG00000013627 | HHIPL2     | -1.825264633 | 0.036689873 |
| ENSCAFG00000013694 | ADIPOQ     | 3.534335496  | 0.008276276 |
| ENSCAFG00000013716 | LRRC2      | -1.091034562 | 0.000697515 |
| ENSCAFG00000013723 | SHF        | 2.022218768  | 0.008626674 |
| ENSCAFG00000013728 | MYL4       | 3.638724975  | 0.002947883 |
| ENSCAFG00000013756 | CLEC14A    | -1.417220425 | 4.34E-05    |
| ENSCAFG00000013774 | MAP3K14    | 1.213088428  | 0.002802256 |
| ENSCAFG00000013844 | NCAM1      | 3.120117838  | 0.001500823 |
| ENSCAFG00000013874 | CXCR6      | -1.618874398 | 0.002416871 |
| ENSCAFG00000013904 | BCL6       | 1.309572206  | 0.000779892 |
| ENSCAFG00000013961 | TP63       | 1.169710929  | 0.000398766 |
| ENSCAFG00000013981 | RALGPS2    | 1.536614945  | 0.022755965 |
| ENSCAFG00000013990 |            | 1.169896005  | 0.016617495 |
| ENSCAFG00000014005 | ANGPTL1    | 1.032044708  | 0.007823735 |
| ENSCAFG00000014016 | DLAT       | -1.192381172 | 0.045489255 |
| ENSCAFG00000014017 | BATF2      | 1.095116953  | 0.009789086 |
| ENSCAFG00000014049 | CLEC3B     | 1.523209988  | 0.000173175 |
| ENSCAFG00000014051 | TSPAN7     | 1.02608544   | 3.83E-05    |
| ENSCAFG00000014054 | ACHE       | 2.39967239   | 0.005847406 |
| ENSCAFG00000014100 | SGPL1      | 1.235415015  | 0.000353075 |
| ENSCAFG00000014124 | CHCHD10    | -1.597283739 | 0.010210759 |
| ENSCAFG00000014131 | C18H7orf57 | 1.54160873   | 0.019549359 |
| ENSCAFG00000014220 | C1R        | 1.025010153  | 0.025651709 |
| ENSCAFG00000014237 | L2HGDH     | -1.55661932  | 0.014647836 |
| ENSCAFG00000014308 | ALAS2      | 2.022795179  | 4.53E-09    |
| ENSCAFG00000014310 | APEX2      | 2.030600222  | 2.09E-07    |
| ENSCAFG00000014319 | UNC5B      | -1.142377114 | 0.005990588 |
| ENSCAFG00000014322 | PCOLCE     | 1.205708639  | 0.024618058 |
| ENSCAFG00000014323 | EPHB2      | 2.391796378  | 0.007936554 |
| ENSCAFG00000014338 | NRXN2      | 2.959795843  | 3.23E-05    |
| ENSCAFG00000014343 | SAP25      | 2.481888236  | 0.007783869 |

|                    |          |              |             |
|--------------------|----------|--------------|-------------|
| ENSCAFG00000014410 | CHST3    | 1.156284932  | 0.012681418 |
| ENSCAFG00000014413 | SPOCK2   | -1.120271208 | 0.002462955 |
| ENSCAFG00000014435 | MAOA     | 1.462094265  | 0.000389039 |
| ENSCAFG00000014443 | TSC22D4  | 1.17473527   | 2.89E-05    |
| ENSCAFG00000014448 | ZNF804A  | 3.324081824  | 8.51E-05    |
| ENSCAFG00000014455 | ESRRA    | -1.265424457 | 0.000372056 |
| ENSCAFG00000014474 | IGFBP5   | 2.440585471  | 1.26E-08    |
| ENSCAFG00000014476 | MEOX1    | -1.138240071 | 0.00555886  |
| ENSCAFG00000014497 |          | 1.239140592  | 0.019829173 |
| ENSCAFG00000014548 | FBN1     | 1.235919422  | 0.038067722 |
| ENSCAFG00000014551 | GAL3ST4  | 1.729897576  | 0.013455288 |
| ENSCAFG00000014554 | ACOX3    | -1.129390922 | 0.001646278 |
| ENSCAFG00000014568 |          | 1.00599797   | 0.00182064  |
| ENSCAFG00000014570 | ACAT1    | -1.035864976 | 0.002820895 |
| ENSCAFG00000014582 | SERPINI1 | 1.693460531  | 0.03456703  |
| ENSCAFG00000014583 | CPZ      | 5.329320522  | 0.000221795 |
| ENSCAFG00000014591 | TRPT1    | -1.294659246 | 0.027885272 |
| ENSCAFG00000014595 | PYGL     | 1.518344233  | 0.029492942 |
| ENSCAFG00000014600 | BRCA1    | 1.416407049  | 0.000149878 |
| ENSCAFG00000014604 | NUDT13   | -1.018056246 | 0.007168375 |
| ENSCAFG00000014616 | COMP     | -5.740289206 | 0.007738818 |
| ENSCAFG00000014627 |          | 1.24489717   | 0.004098713 |
| ENSCAFG00000014668 | SLC35F2  | -1.328482258 | 0.028279613 |
| ENSCAFG00000014679 | PLEKHH3  | 1.129808878  | 0.01225267  |
| ENSCAFG00000014767 | SLC9A7   | 1.569963702  | 0.002519878 |
| ENSCAFG00000014812 | COL3A1   | 2.592138197  | 7.42E-05    |
| ENSCAFG00000014831 | SH3BP2   | 1.577286613  | 0.002440028 |
| ENSCAFG00000014837 | COL5A2   | 1.677984988  | 0.005884364 |
| ENSCAFG00000014838 | GRIA4    | 1.938506355  | 0.000341434 |
| ENSCAFG00000014923 | FGF7     | 3.412306098  | 3.66E-06    |
| ENSCAFG00000014968 |          | 1.234764568  | 0.000249656 |
| ENSCAFG00000014978 |          | 2.333590538  | 1.59E-07    |
| ENSCAFG00000015009 | MAST3    | 1.311285718  | 0.008373248 |
| ENSCAFG00000015013 | LGALS3   | 1.228948364  | 0.016134212 |
| ENSCAFG00000015078 | FAM184B  | 2.420010828  | 7.78E-06    |
| ENSCAFG00000015091 | LGALS12  | 3.211561178  | 0.000994195 |
| ENSCAFG00000015196 | SCNN1A   | 1.477010439  | 0.007560579 |
| ENSCAFG00000015203 | PLEKHG6  | 1.354786785  | 0.031915668 |
| ENSCAFG00000015209 | TUBA4A   | -2.085553592 | 2.82E-05    |
| ENSCAFG00000015217 |          | -2.109544247 | 1.43E-05    |
| ENSCAFG00000015233 | PROM1    | -1.623183312 | 0.002747785 |
| ENSCAFG00000015235 | SLC19A2  | -1.100735424 | 0.028790754 |
| ENSCAFG00000015257 | ANO2     | 1.879028699  | 2.00E-06    |
| ENSCAFG00000015272 | FGFBP1   | -3.536343867 | 2.28E-05    |
| ENSCAFG00000015298 | CD38     | -1.182073932 | 0.006225598 |
| ENSCAFG00000015320 | NDUFA9   | -1.05069387  | 0.019828262 |
| ENSCAFG00000015360 | GLDN     | 1.143461561  | 0.043070378 |
| ENSCAFG00000015427 | ZNF503   | 2.014152001  | 0.000243553 |
| ENSCAFG00000015430 | ABHD8    | -1.117610208 | 0.046438985 |
| ENSCAFG00000015484 | WSCD1    | -1.438262849 | 0.001298777 |

|                    |          |              |             |
|--------------------|----------|--------------|-------------|
| ENSCAFG00000015512 | POU2F1   | 1.13302006   | 0.029099661 |
| ENSCAFG00000015539 | PAX7     | 1.395532008  | 0.0013233   |
| ENSCAFG00000015625 | FMN2     | 1.36151607   | 0.001317236 |
| ENSCAFG00000015662 | GNB5     | -1.039096649 | 0.001076432 |
| ENSCAFG00000015695 | PRKCH    | -1.248484833 | 0.000306475 |
| ENSCAFG00000015731 | ZNF385C  | 4.692270181  | 6.99E-06    |
| ENSCAFG00000015788 | B4GALNT3 | 2.636017186  | 0.010793726 |
| ENSCAFG00000015878 | UCHL1    | 1.546077843  | 0.005539765 |
| ENSCAFG00000015920 | HAP1     | 5.043410399  | 7.96E-05    |
| ENSCAFG00000015936 | EPHA4    | -1.433980184 | 0.000185468 |
| ENSCAFG00000015943 | PRTG     | 1.444034917  | 0.016455217 |
| ENSCAFG00000015968 | BCL6B    | -1.067609199 | 0.030692266 |
| ENSCAFG00000016022 | KLB      | 2.546535453  | 0.027548092 |
| ENSCAFG00000016036 |          | 7.016258609  | 0.049101968 |
| ENSCAFG00000016072 |          | 1.103191687  | 0.011734775 |
| ENSCAFG00000016142 | TMEM82   | 1.324093088  | 0.007983772 |
| ENSCAFG00000016192 | SDK1     | 1.971691982  | 0.01024194  |
| ENSCAFG00000016225 | ACAP1    | 1.506539113  | 0.000457593 |
| ENSCAFG00000016298 | TMEM102  | 1.1467289    | 0.007763606 |
| ENSCAFG00000016338 | KAZN     | 1.219066392  | 0.02430905  |
| ENSCAFG00000016357 | DBN1     | 1.328042703  | 0.004904397 |
| ENSCAFG00000016368 | PNMT     | 1.466302323  | 0.024897178 |
| ENSCAFG00000016410 | PLEKHH1  | 2.73853123   | 3.36E-05    |
| ENSCAFG00000016423 | PIGH     | -1.152810022 | 0.00264517  |
| ENSCAFG00000016453 | ADGRL1   | 1.307586207  | 0.046507597 |
| ENSCAFG00000016465 | MAGED2   | 1.263446026  | 6.26E-05    |
| ENSCAFG00000016476 | PFKFB1   | -2.045195457 | 0.028672372 |
| ENSCAFG00000016518 | FGFR4    | 1.145955705  | 0.00945188  |
| ENSCAFG00000016541 | ZNF346   | 1.273397861  | 2.96E-05    |
| ENSCAFG00000016550 | ASB12    | -1.234678707 | 0.036824815 |
| ENSCAFG00000016590 | FBXO2    | 2.934905735  | 0.007266281 |
| ENSCAFG00000016596 | DISP3    | 1.705085064  | 0.000168437 |
| ENSCAFG00000016602 | SMOC1    | 1.299880856  | 0.038337447 |
| ENSCAFG00000016615 | MRI1     | 1.149782024  | 0.011404642 |
| ENSCAFG00000016671 | CCDC189  | 1.052591409  | 0.008436979 |
| ENSCAFG00000016718 | HRH2     | 2.426529023  | 0.016221075 |
| ENSCAFG00000016736 | FBXL19   | 1.132719552  | 0.010898339 |
| ENSCAFG00000016757 | CPLX1    | -1.246810011 | 0.033420048 |
| ENSCAFG00000016769 | NES      | 1.905412123  | 0.002378304 |
| ENSCAFG00000016828 | COPZ2    | 1.028632919  | 0.036360494 |
| ENSCAFG00000016850 | GDPD2    | 1.116527742  | 0.021292864 |
| ENSCAFG00000016880 | ATP5MC1  | -1.290162435 | 0.015019756 |
| ENSCAFG00000016928 | ALOX15B  | 6.16785603   | 0.001562234 |
| ENSCAFG00000016983 | RAB8B    | 1.390517014  | 0.000339427 |
| ENSCAFG00000016984 | PER1     | 1.287908041  | 0.023896548 |
| ENSCAFG00000017008 | AURKB    | 1.365287459  | 0.006146469 |
| ENSCAFG00000017015 | CTC1     | 1.105258943  | 0.000215681 |
| ENSCAFG00000017018 | COL1A1   | 3.968024002  | 3.71E-05    |
| ENSCAFG00000017050 | ACSF2    | 1.032690896  | 0.001570815 |
| ENSCAFG00000017064 | CHAD     | -3.034747298 | 0.04528591  |

|                    |          |              |             |
|--------------------|----------|--------------|-------------|
| ENSCAFG00000017099 | SYCE2    | -1.635504004 | 0.042733856 |
| ENSCAFG00000017137 | TENM2    | 3.168026096  | 0.01568875  |
| ENSCAFG00000017138 | CILP     | 2.340963786  | 0.045863276 |
| ENSCAFG00000017160 | IGDCC4   | 1.611713842  | 0.000887137 |
| ENSCAFG00000017182 | SHE      | -1.006177547 | 0.001510638 |
| ENSCAFG00000017184 | IL6R     | -1.029822456 | 0.000192596 |
| ENSCAFG00000017221 |          | 1.222681832  | 0.045185421 |
| ENSCAFG00000017296 | RNF145   | 1.226273609  | 9.04E-05    |
| ENSCAFG00000017329 | FLRT2    | 1.302922919  | 4.29E-05    |
| ENSCAFG00000017334 | ECSIT    | -1.003520116 | 0.024607651 |
| ENSCAFG00000017357 | ADAM19   | 1.226384993  | 0.013534516 |
| ENSCAFG00000017369 | PCTP     | -1.117613987 | 0.033841182 |
| ENSCAFG00000017409 | AKAP1    | -1.10400603  | 0.0014909   |
| ENSCAFG00000017428 | SWSAP1   | 1.371982025  | 0.008409668 |
| ENSCAFG00000017447 | IL4R     | 1.248343849  | 0.022922305 |
| ENSCAFG00000017464 | MKS1     | 1.260077764  | 0.000686005 |
| ENSCAFG00000017615 | ST8SIA5  | -1.236747114 | 0.005677044 |
| ENSCAFG00000017616 | LARP6    | 1.362183971  | 0.003800504 |
| ENSCAFG00000017623 | LRRC49   | 1.198437276  | 0.023288841 |
| ENSCAFG00000017635 | RNF165   | 1.158703871  | 0.046442703 |
| ENSCAFG00000017646 | SERPINA1 | -1.174885668 | 0.024622457 |
| ENSCAFG00000017705 | ARMCX2   | 2.602599203  | 9.83E-05    |
| ENSCAFG00000017775 | GPRASP1  | 1.501415882  | 0.021983163 |
| ENSCAFG00000017807 | CRYM     | 2.825829237  | 0.031597899 |
| ENSCAFG00000017820 | CD276    | 1.441143737  | 0.002608374 |
| ENSCAFG00000017845 | DHRS11   | -1.215720734 | 0.046373754 |
| ENSCAFG00000017849 | MRM1     | -1.321851241 | 0.002475274 |
| ENSCAFG00000017883 | NRK      | 4.56944269   | 2.99E-09    |
| ENSCAFG00000017907 | GM2A     | 1.12907133   | 0.036952483 |
| ENSCAFG00000017937 | CYP1A1   | -3.702677255 | 0.000232808 |
| ENSCAFG00000017952 | ACSM3    | 1.819467539  | 0.018952127 |
| ENSCAFG00000017953 | MORC4    | 1.129584494  | 0.002177112 |
| ENSCAFG00000018005 | MAN2C1   | 1.25661649   | 0.001797728 |
| ENSCAFG00000018016 | COL4A6   | 1.458823574  | 0.045189856 |
| ENSCAFG00000018020 | COL4A5   | 1.635057893  | 0.014631745 |
| ENSCAFG00000018047 |          | 2.160675078  | 0.016470294 |
| ENSCAFG00000018051 | DSG2     | 1.417607614  | 0.02039699  |
| ENSCAFG00000018067 | RCOR1    | 1.068591304  | 0.005157855 |
| ENSCAFG00000018078 |          | -1.074331588 | 0.012162706 |
| ENSCAFG00000018117 | CHRD1    | 2.352323782  | 0.000891988 |
| ENSCAFG00000018127 | TMC7     | 1.18221282   | 0.039064479 |
| ENSCAFG00000018175 | CAPN6    | 2.00326409   | 0.000133598 |
| ENSCAFG00000018180 | ANKRD29  | -1.163002828 | 0.016331406 |
| ENSCAFG00000018197 | ABCC6    | 1.653929939  | 0.030537908 |
| ENSCAFG00000018238 | TIGD6    | 1.167965054  | 0.016284621 |
| ENSCAFG00000018254 | GREB1L   | 1.060288136  | 0.000784847 |
| ENSCAFG00000018272 | KLHL13   | 1.656963535  | 6.08E-06    |
| ENSCAFG00000018277 |          | 2.255816402  | 0.003192217 |
| ENSCAFG00000018323 | ABLIM3   | -1.34203927  | 5.97E-05    |
| ENSCAFG00000018360 |          | 3.632723822  | 0.001075597 |

|                    |          |              |             |
|--------------------|----------|--------------|-------------|
| ENSCAFG00000018405 | FST      | 4.433409456  | 5.60E-10    |
| ENSCAFG00000018413 | BTBD6    | -1.085046017 | 0.006204257 |
| ENSCAFG00000018415 | MOCS2    | -1.083278522 | 0.033137482 |
| ENSCAFG00000018422 | FBN3     | 1.265439091  | 0.015707351 |
| ENSCAFG00000018436 | SREBF1   | 1.042122545  | 0.005803952 |
| ENSCAFG00000018457 | NT5M     | -2.678846074 | 5.02E-06    |
| ENSCAFG00000018461 | TMEM255A | 1.139670736  | 0.00725969  |
| ENSCAFG00000018506 | ANGPTL4  | 1.470240237  | 0.042568829 |
| ENSCAFG00000018527 | PRAM1    | 2.267653354  | 0.002051124 |
| ENSCAFG00000018556 | WDR78    | 1.068222779  | 0.019732746 |
| ENSCAFG00000018586 |          | 1.2615627    | 0.011231598 |
| ENSCAFG00000018591 | ARHGAP28 | 1.078779418  | 0.044040402 |
| ENSCAFG00000018621 | CACHD1   | 1.342444767  | 0.002252598 |
| ENSCAFG00000018622 | DAB2     | 1.23392926   | 0.02486107  |
| ENSCAFG00000018625 | C3       | 1.77318267   | 0.028217786 |
| ENSCAFG00000018629 | WSB1     | 1.256482361  | 0.00340602  |
| ENSCAFG00000018641 | LGALS9   | -1.247576154 | 0.003849405 |
| ENSCAFG00000018643 | SLC25A23 | 1.637985631  | 0.003785276 |
| ENSCAFG00000018654 | PRR32    | 2.403978145  | 0.04992427  |
| ENSCAFG00000018672 | VTN      | -1.139791483 | 0.034406813 |
| ENSCAFG00000018702 | EFCAB7   | -2.524855109 | 9.40E-07    |
| ENSCAFG00000018713 | UNC119   | -1.29224736  | 0.030674464 |
| ENSCAFG00000018761 | PIEZO2   | 2.189773568  | 0.028699958 |
| ENSCAFG00000018785 | ARHGAP36 | 4.498505928  | 1.05E-07    |
| ENSCAFG00000018787 | GNAL     | -3.282201833 | 0.000112493 |
| ENSCAFG00000018792 |          | 1.164728391  | 0.003547974 |
| ENSCAFG00000018812 |          | -1.201361383 | 0.003990348 |
| ENSCAFG00000018825 |          | 1.612554976  | 0.022979474 |
| ENSCAFG00000018828 | CIDEA    | 2.573016458  | 0.030932146 |
| ENSCAFG00000018832 | TUBB6    | 1.60572272   | 0.00312257  |
| ENSCAFG00000018844 | ADAMTS12 | 1.1161611    | 0.006452716 |
| ENSCAFG00000018864 | GPC3     | 3.637905291  | 0.000488242 |
| ENSCAFG00000018939 |          | 1.21419424   | 0.000136923 |
| ENSCAFG00000018959 | EMP2     | 1.219309968  | 0.028751576 |
| ENSCAFG00000019014 | SEMA6B   | 2.027154129  | 0.000466259 |
| ENSCAFG00000019053 | CYB5RL   | -1.165933182 | 0.013563887 |
| ENSCAFG00000019071 | TRARG1   | 3.411899961  | 0.01155865  |
| ENSCAFG00000019082 | RBFOX1   | 1.018925255  | 7.01E-06    |
| ENSCAFG00000019116 | MAMLD1   | 1.658100211  | 0.000483916 |
| ENSCAFG00000019130 | RFLNB    | -1.745208412 | 0.000258429 |
| ENSCAFG00000019166 | ROGDI    | -1.802804668 | 0.048991131 |
| ENSCAFG00000019177 | SLC1A7   | 1.515812379  | 5.95E-06    |
| ENSCAFG00000019183 | PODN     | 1.100420401  | 0.000952119 |
| ENSCAFG00000019194 | SLC43A2  | 1.785886391  | 1.78E-05    |
| ENSCAFG00000019230 | ATP2B3   | 1.951482529  | 0.006389196 |
| ENSCAFG00000019237 | ADCY9    | -1.114361916 | 0.000324646 |
| ENSCAFG00000019270 | PLXNB3   | 1.122704763  | 0.000294855 |
| ENSCAFG00000019294 | ACAP3    | 1.378755999  | 0.00145157  |
| ENSCAFG00000019343 | FLYWCH1  | 1.076444656  | 0.014196013 |
| ENSCAFG00000019346 | SRRM2    | 1.152116405  | 0.002210319 |

|                    |              |              |             |
|--------------------|--------------|--------------|-------------|
| ENSCAFG00000019377 | CAMKK1       | 1.061417546  | 0.00604793  |
| ENSCAFG00000019445 | NRARP        | -1.371850569 | 0.00174184  |
| ENSCAFG00000019451 | TKTL1        | -2.365177908 | 0.000392294 |
| ENSCAFG00000019473 | PRDM16       | 1.56258782   | 0.023418886 |
| ENSCAFG00000019489 | TP73         | 2.905575709  | 0.000750335 |
| ENSCAFG00000019536 | ATP5F1D      | -1.030452183 | 0.020752689 |
| ENSCAFG00000019567 | RNF207       | -1.573054    | 0.018750376 |
| ENSCAFG00000019590 | UBL4A        | -1.14127969  | 0.02466721  |
| ENSCAFG00000019601 | SOX8         | 1.297888547  | 0.008758612 |
| ENSCAFG00000019635 |              | -1.315155354 | 0.00389216  |
| ENSCAFG00000019662 | PIGQ         | 1.321305634  | 0.000163073 |
| ENSCAFG00000019694 | GP5M1        | 1.480397685  | 0.010779818 |
| ENSCAFG00000019714 | SLC2A5       | 3.662276198  | 0.003281143 |
| ENSCAFG00000019738 | ATP5PB       | -1.134909319 | 0.023993713 |
| ENSCAFG00000019760 | MED22        | -1.003795679 | 0.002604276 |
| ENSCAFG00000019812 | GSTM4        | -1.041475283 | 0.003997931 |
| ENSCAFG00000019829 | ATXN7L2      | 1.466317888  | 1.11E-05    |
| ENSCAFG00000019834 | CPNE7        | 3.194826921  | 0.000221826 |
| ENSCAFG00000019852 | CBFA2T3      | 1.389650257  | 0.017585781 |
| ENSCAFG00000019921 | COX4I1       | -1.040576399 | 0.047115615 |
| ENSCAFG00000019928 | GSE1         | 1.019355506  | 0.011056873 |
| ENSCAFG00000019950 | HMCN2        | 1.4102366    | 0.014530595 |
| ENSCAFG00000020004 | VCAM1        | 1.173869177  | 0.009799168 |
| ENSCAFG00000020024 | DYNLRB2      | 2.549179548  | 0.001473666 |
| ENSCAFG00000020030 | KYAT1        | -1.113593444 | 0.02654489  |
| ENSCAFG00000020035 | NUDT7        | 1.24456432   | 0.004605289 |
| ENSCAFG00000020094 | FAM102A      | 2.175401974  | 1.36E-07    |
| ENSCAFG00000020100 |              | -1.298089557 | 0.01057904  |
| ENSCAFG00000020106 | ENG          | -1.282085721 | 0.000110507 |
| ENSCAFG00000020110 | F3           | 1.360860182  | 0.021465896 |
| ENSCAFG00000020144 | FUK          | 1.363530793  | 5.80E-08    |
| ENSCAFG00000020153 | MTSS1L       | 1.737018296  | 5.57E-06    |
| ENSCAFG00000020166 | ANGPTL2      | 2.573477699  | 7.16E-11    |
| ENSCAFG00000020220 |              | 2.710240535  | 0.021401542 |
| ENSCAFG00000020254 | NFAT5        | 1.457593548  | 0.001338247 |
| ENSCAFG00000020270 | COL24A1      | 2.567528107  | 0.027077318 |
| ENSCAFG00000020294 | HAS3         | -1.40053182  | 0.000946821 |
| ENSCAFG00000020333 | PSMB10       | -1.066807478 | 0.024860678 |
| ENSCAFG00000020340 | ADGRL4       | -1.389071283 | 9.14E-05    |
| ENSCAFG00000020345 | PTGFR        | -1.882157801 | 0.009963985 |
| ENSCAFG00000020369 | SLC9A5       | 1.227998639  | 0.007339295 |
| ENSCAFG00000020413 | CDH5         | -1.237957677 | 0.000359471 |
| ENSCAFG00000020417 | CTH          | -1.149510162 | 0.010873072 |
| ENSCAFG00000020524 | MIR1-2       | 1.522709537  | 5.43E-06    |
| ENSCAFG00000020633 | cfa-mir-133a | 1.929976766  | 3.51E-06    |
| ENSCAFG00000020713 | RF00279      | -2.083900776 | 0.000291767 |
| ENSCAFG00000022709 |              | -1.487261545 | 0.008641199 |
| ENSCAFG00000022711 |              | -1.373442881 | 0.011590714 |
| ENSCAFG00000022723 | MT-CO1       | -1.281616041 | 0.012645365 |
| ENSCAFG00000022728 | MT-ATP8      | -1.303498003 | 0.000938689 |

|                    |          |              |             |
|--------------------|----------|--------------|-------------|
| ENSCAFG00000022730 | COX3     | -1.041425507 | 0.036124624 |
| ENSCAFG00000022741 |          | -1.298356819 | 0.028690756 |
| ENSCAFG00000022843 | MIR675   | 2.622702983  | 0.006007069 |
| ENSCAFG00000022889 | MIR24-2  | 1.557398431  | 0.006861982 |
| ENSCAFG00000023027 | ARRDC5   | 1.150509869  | 0.034139101 |
| ENSCAFG00000023152 |          | 1.153009884  | 0.011834166 |
| ENSCAFG00000023394 |          | -1.002758554 | 0.046946751 |
| ENSCAFG00000023408 |          | -1.141723145 | 0.00714097  |
| ENSCAFG00000023538 | SRRT     | 1.035214781  | 0.000559737 |
| ENSCAFG00000023540 |          | 1.325121237  | 0.04352233  |
| ENSCAFG00000023689 | LIPJ     | -1.303260733 | 0.014301072 |
| ENSCAFG00000023755 | GMPPB    | 1.017011418  | 0.003720277 |
| ENSCAFG00000023759 | MT2A     | 2.547857727  | 0.014089363 |
| ENSCAFG00000023832 |          | -1.323891006 | 0.000151578 |
| ENSCAFG00000023837 | PTGFRN   | 1.424024688  | 0.002561536 |
| ENSCAFG00000023881 | ZNF227   | 1.439084463  | 0.000355734 |
| ENSCAFG00000023904 | CHRN4    | 2.994776744  | 0.000373308 |
| ENSCAFG00000024028 |          | 2.025626677  | 0.000349439 |
| ENSCAFG00000024187 | DPEP2    | -2.179177004 | 1.09E-08    |
| ENSCAFG00000024406 |          | 1.644415907  | 0.004026007 |
| ENSCAFG00000024433 | COLCA2   | 1.691023787  | 0.038485686 |
| ENSCAFG00000024609 | CNTN2    | 2.872419854  | 0.001725726 |
| ENSCAFG00000024646 | ERAP2    | -1.390258295 | 0.001184727 |
| ENSCAFG00000024681 |          | 6.923324906  | 0.002140458 |
| ENSCAFG00000024731 | RP9      | -1.25200675  | 0.000100499 |
| ENSCAFG00000024802 |          | 1.13555329   | 0.0399155   |
| ENSCAFG00000024807 | CHRNA    | 6.422497873  | 0.0029329   |
| ENSCAFG00000024834 |          | 3.157742172  | 0.001492967 |
| ENSCAFG00000024981 | TMEM38B  | 1.044771122  | 0.003535476 |
| ENSCAFG00000025295 |          | 1.227862985  | 0.006313467 |
| ENSCAFG00000025390 | SLC22A17 | 2.258264891  | 0.003516952 |
| ENSCAFG00000025426 |          | 1.980026291  | 0.014334263 |
| ENSCAFG00000025524 |          | 2.074208752  | 0.006384599 |
| ENSCAFG00000025533 | ITIH4    | 1.013945047  | 0.009572697 |
| ENSCAFG00000025586 |          | 3.606892375  | 2.35E-05    |
| ENSCAFG00000025589 |          | -1.184356045 | 0.002014859 |
| ENSCAFG00000027573 |          | 2.088437342  | 0.000913359 |
| ENSCAFG00000028459 | MT3      | 6.12600805   | 1.89E-05    |
| ENSCAFG00000028490 |          | 2.134516548  | 0.008739537 |
| ENSCAFG00000028506 |          | 2.666777618  | 0.000629504 |
| ENSCAFG00000028544 |          | 6.025239852  | 0.000217346 |
| ENSCAFG00000028591 | POPDC3   | -1.179910135 | 0.009246531 |
| ENSCAFG00000028594 | RF01973  | 2.538790086  | 0.009764673 |
| ENSCAFG00000028605 | PNPLA4   | -1.226578556 | 0.016875525 |
| ENSCAFG00000028647 | BGLAP    | 2.961988926  | 0.000994914 |
| ENSCAFG00000028653 |          | 3.005018503  | 0.002895369 |
| ENSCAFG00000028669 | FAM171B  | 1.876683757  | 0.014915819 |
| ENSCAFG00000028708 | SCD5     | -2.404269087 | 1.34E-09    |
| ENSCAFG00000028754 | PLPP3    | 1.013266994  | 0.015129931 |
| ENSCAFG00000028761 |          | 1.789993968  | 0.001797349 |



|                    |         |              |             |
|--------------------|---------|--------------|-------------|
| ENSCAFG00000028779 | MRPS6   | -1.22526602  | 0.01180128  |
| ENSCAFG00000028785 |         | -1.434138605 | 0.000604656 |
| ENSCAFG00000028801 |         | 1.028688874  | 0.001733252 |
| ENSCAFG00000028802 | MRPL34  | -1.420822833 | 0.004781607 |
| ENSCAFG00000028810 | GPIHBP1 | -1.280947073 | 0.027348992 |
| ENSCAFG00000028817 | CFD     | 1.662655693  | 1.54E-05    |
| ENSCAFG00000028837 | UQCR10  | -1.046547221 | 0.00459733  |
| ENSCAFG00000028858 | FHL5    | -1.041337881 | 0.019632104 |
| ENSCAFG00000028875 | CD248   | 1.407514548  | 0.008157337 |
| ENSCAFG00000028947 | ELN     | 2.210170418  | 0.000433772 |
| ENSCAFG00000028958 | TCEAL7  | 2.531827754  | 0.001014956 |
| ENSCAFG00000028982 |         | 1.813534269  | 0.021815695 |
| ENSCAFG00000028991 |         | -1.090367596 | 0.001494158 |
| ENSCAFG00000029004 |         | -1.599186648 | 0.002268363 |
| ENSCAFG00000029014 |         | 1.707414546  | 0.007301902 |
| ENSCAFG00000029022 | COL6A2  | 1.061496819  | 0.034343103 |
| ENSCAFG00000029045 | ACSL3   | 1.046036849  | 0.008872524 |
| ENSCAFG00000029101 | NOG     | 1.883194247  | 0.004081021 |
| ENSCAFG00000029129 | RF01871 | 1.763822646  | 0.000836747 |
| ENSCAFG00000029157 | NOVA1   | 1.646552438  | 0.024733568 |
| ENSCAFG00000029245 | ABHD14A | -1.117442156 | 0.008014348 |
| ENSCAFG00000029278 | SOX18   | -1.236479407 | 0.00022722  |
| ENSCAFG00000029304 | RF01972 | 2.581346343  | 0.006723539 |
| ENSCAFG00000029321 | WNT5A   | 1.351539574  | 0.004451194 |
| ENSCAFG00000029359 | KCNK5   | 2.439089957  | 0.003274368 |
| ENSCAFG00000029367 | COL28A1 | 1.848543155  | 0.00670202  |
| ENSCAFG00000029381 |         | 1.056372236  | 0.039574702 |
| ENSCAFG00000029425 | SRPK3   | 1.930700602  | 0.000785187 |
| ENSCAFG00000029427 |         | 1.124815545  | 0.028043853 |
| ENSCAFG00000029464 | CDC34   | -1.192289701 | 0.011546037 |
| ENSCAFG00000029474 | GADD45A | 1.924300999  | 3.16E-08    |
| ENSCAFG00000029558 | BMF     | 1.303865998  | 0.00263344  |
| ENSCAFG00000029587 |         | -1.426038611 | 0.039437274 |
| ENSCAFG00000029672 |         | -1.292002834 | 0.010020094 |
| ENSCAFG00000029674 |         | 1.110569044  | 0.000527864 |
| ENSCAFG00000029771 | ETFRF1  | -1.066628869 | 0.047038849 |
| ENSCAFG00000029798 | RF01955 | 2.088740867  | 0.000595944 |
| ENSCAFG00000029853 | CDKN1A  | 2.880122608  | 3.50E-05    |
| ENSCAFG00000029856 | RF01881 | 10.4738747   | 0.020926299 |
| ENSCAFG00000029882 | MISP    | 2.717892814  | 0.010353504 |
| ENSCAFG00000029937 | EFHD1   | 2.224916162  | 2.69E-05    |
| ENSCAFG00000029969 | RGS4    | -1.026160719 | 0.0297151   |
| ENSCAFG00000030025 | FGL2    | 1.646365038  | 0.006467272 |
| ENSCAFG00000030039 |         | -1.129461395 | 0.015693099 |
| ENSCAFG00000030057 | ZNF234  | 1.10813289   | 0.001150161 |
| ENSCAFG00000030058 | ECI1    | -1.030053819 | 0.024263669 |
| ENSCAFG00000030080 |         | 1.148181614  | 0.00489728  |
| ENSCAFG00000030091 |         | -1.275913261 | 0.010161037 |
| ENSCAFG00000030120 | CSPG4   | 2.24944815   | 0.032928671 |
| ENSCAFG00000030143 |         | -1.066056007 | 0.012778784 |

|                    |         |              |             |
|--------------------|---------|--------------|-------------|
| ENSCAFG00000030159 |         | -1.227600944 | 0.043413381 |
| ENSCAFG00000030198 |         | 2.498094202  | 0.001063778 |
| ENSCAFG00000030307 |         | 1.658890403  | 0.004582828 |
| ENSCAFG00000030320 | SHISA2  | 2.197868448  | 6.20E-06    |
| ENSCAFG00000030348 |         | -1.296446626 | 0.004574621 |
| ENSCAFG00000030445 |         | 2.000548028  | 0.000527698 |
| ENSCAFG00000030466 |         | -1.240887145 | 0.00556606  |
| ENSCAFG00000030529 |         | 1.46912927   | 0.002699317 |
| ENSCAFG00000030538 |         | -1.075435722 | 0.013442398 |
| ENSCAFG00000030588 |         | 2.723270352  | 0.001089448 |
| ENSCAFG00000030617 | NXP3    | -2.561698096 | 0.025531412 |
| ENSCAFG00000030662 |         | 3.778100823  | 1.11E-05    |
| ENSCAFG00000030682 |         | 3.481809075  | 4.97E-05    |
| ENSCAFG00000030715 |         | 1.765640989  | 0.000114114 |
| ENSCAFG00000030745 | SRSF12  | 1.108425678  | 0.01475907  |
| ENSCAFG00000030769 | SLC35F6 | 1.193279372  | 0.005878154 |
| ENSCAFG00000030770 |         | 1.930142258  | 0.015083311 |
| ENSCAFG00000030835 |         | -1.451368233 | 0.017367549 |
| ENSCAFG00000030838 | PTGES   | 2.013018561  | 0.016653489 |
| ENSCAFG00000030871 |         | 1.05857212   | 0.007375821 |
| ENSCAFG00000030875 |         | 1.608460075  | 0.048815124 |
| ENSCAFG00000030921 | ATP5MD  | -1.059311162 | 0.033068031 |
| ENSCAFG00000030932 | TMEM218 | 1.366326812  | 0.002125813 |
| ENSCAFG00000030939 |         | 1.528769482  | 0.002116392 |
| ENSCAFG00000030990 | INSYN1  | -1.061935662 | 0.022583191 |
| ENSCAFG00000030999 |         | 1.52685938   | 0.005710941 |
| ENSCAFG00000031042 | PLAGL2  | 1.246297526  | 0.013784998 |
| ENSCAFG00000031124 | APH1B   | 1.00076677   | 0.026136988 |
| ENSCAFG00000031158 | EPDR1   | -1.118055986 | 0.049551727 |
| ENSCAFG00000031234 | KY      | 1.815304444  | 6.53E-06    |
| ENSCAFG00000031239 |         | 3.005095626  | 0.000570039 |
| ENSCAFG00000031288 | RF01956 | 1.827918233  | 0.002792908 |
| ENSCAFG00000031322 | PDXK    | 1.305125294  | 0.001498442 |
| ENSCAFG00000031328 | RF01956 | 2.367910209  | 0.002575286 |
| ENSCAFG00000031376 | UBXN2A  | -1.177242351 | 0.002420848 |
| ENSCAFG00000031437 |         | 1.919612134  | 0.010516873 |
| ENSCAFG00000031454 |         | 1.094919979  | 0.027078429 |
| ENSCAFG00000031481 |         | -3.618944662 | 0.001123586 |
| ENSCAFG00000031536 | LDLRAD4 | -1.135538343 | 0.036520225 |
| ENSCAFG00000031544 |         | 1.157752637  | 0.046680847 |
| ENSCAFG00000031557 |         | 1.502635768  | 0.000783021 |
| ENSCAFG00000031576 | PARD6A  | -1.317161772 | 0.015439296 |
| ENSCAFG00000031628 |         | -1.048957844 | 0.011287982 |
| ENSCAFG00000031672 | CLBA1   | 1.385946391  | 0.009493958 |
| ENSCAFG00000031678 | POLR2M  | -1.078491234 | 0.002957049 |
| ENSCAFG00000031706 |         | -1.28177841  | 0.000149951 |
| ENSCAFG00000031711 |         | -1.031745791 | 0.007657675 |
| ENSCAFG00000031732 |         | 1.208240735  | 0.023597593 |
| ENSCAFG00000031759 | NAPRT   | 1.137586726  | 0.000246641 |
| ENSCAFG00000031761 | NDUFAF4 | -1.157022869 | 0.00342678  |

|                    |          |              |             |
|--------------------|----------|--------------|-------------|
| ENSCAFG00000031767 | TUBA3D   | -1.183800581 | 0.008601769 |
| ENSCAFG00000031894 | TENT5A   | 1.583488798  | 0.007734554 |
| ENSCAFG00000031936 | NRBF2    | -1.185641603 | 0.003078252 |
| ENSCAFG00000031973 |          | 1.332445171  | 0.006817586 |
| ENSCAFG00000032024 | GPR162   | -2.463949496 | 6.21E-05    |
| ENSCAFG00000032043 |          | -2.20433237  | 0.001678703 |
| ENSCAFG00000032112 | TAL2     | 2.94392871   | 0.004917625 |
| ENSCAFG00000032118 |          | -1.138895773 | 0.018276892 |
| ENSCAFG00000032120 | C1QTNF6  | 2.399081358  | 0.000135655 |
| ENSCAFG00000032127 | CHST11   | 2.345499067  | 6.03E-05    |
| ENSCAFG00000032147 | BAALC    | -1.13266298  | 0.002420569 |
| ENSCAFG00000032192 | RF01957  | 1.877600911  | 0.001393978 |
| ENSCAFG00000032227 | OLFM1    | 2.018599342  | 0.001343614 |
| ENSCAFG00000032235 |          | 1.063675433  | 0.022272439 |
| ENSCAFG00000032261 | SPA17    | 1.15161096   | 0.006804599 |
| ENSCAFG00000032271 | CLEC2L   | -2.673159068 | 0.010646838 |
| ENSCAFG00000032273 | FXVD6    | -1.02034559  | 0.004449233 |
| ENSCAFG00000032286 |          | 3.21861502   | 0.000368607 |
| ENSCAFG00000032289 | BMP6     | -1.032987354 | 0.000296286 |
| ENSCAFG00000032331 |          | 3.759854124  | 0.00023202  |
| ENSCAFG00000032339 | CYP2A13  | 3.901819907  | 0.003396964 |
| ENSCAFG00000032342 | PDGFD    | 1.400444854  | 0.020132685 |
| ENSCAFG00000032355 |          | -1.009631633 | 0.003177971 |
| ENSCAFG00000032379 | PEG10    | 1.896958064  | 0.015761427 |
| ENSCAFG00000032391 | FAM83H   | 2.867942717  | 5.20E-05    |
| ENSCAFG00000032403 | MAP3K7CL | 2.373587607  | 0.000262929 |
| ENSCAFG00000032412 | FLI1     | -1.077108936 | 0.008566654 |
| ENSCAFG00000032457 | MAFA     | 1.080659691  | 0.006458248 |
| ENSCAFG00000032459 |          | -1.283411154 | 0.004252818 |
| ENSCAFG00000032489 | SHISA7   | 1.212888972  | 0.03862263  |
| ENSCAFG00000032569 | RBP1     | -1.768499041 | 0.02438051  |
| ENSCAFG00000032571 |          | 3.739198549  | 1.03E-05    |
| ENSCAFG00000032575 |          | -1.078791495 | 0.030479117 |
| ENSCAFG00000032578 |          | 6.30787986   | 0.000471961 |
| ENSCAFG00000032608 | LURAP1L  | -1.145101363 | 0.004169693 |
| ENSCAFG00000032656 |          | 1.339257263  | 0.001295681 |
| ENSCAFG00000032684 |          | 3.042024837  | 0.000473205 |
| ENSCAFG00000032694 | TFB2M    | -1.275430636 | 0.000734926 |
| ENSCAFG00000032756 | FAM198B  | -1.064271179 | 0.007440683 |
| ENSCAFG00000032816 |          | 1.215080564  | 0.01315781  |
| ENSCAFG00000032896 |          | 2.943493356  | 2.03E-05    |
| ENSCAFG00000032930 |          | 1.677166808  | 0.00614993  |
| ENSCAFG00000033011 |          | -2.743409349 | 0.015945439 |
| ENSCAFG00000033086 |          | 2.931779724  | 0.014295762 |
| ENSCAFG00000033248 |          | -3.429665114 | 6.00E-05    |
| ENSCAFG00000033312 |          | -1.936984845 | 0.000720157 |
| ENSCAFG00000033759 |          | -4.107143429 | 6.77E-05    |
| ENSCAFG00000034559 |          | -1.025799586 | 0.01361523  |
| ENSCAFG00000034578 |          | -1.802512961 | 0.027193228 |
| ENSCAFG00000034881 |          | 2.008075137  | 0.003050977 |

|                    |              |             |
|--------------------|--------------|-------------|
| ENSCAFG00000034998 | -1.43732112  | 0.00348454  |
| ENSCAFG00000035036 | -1.682876794 | 0.019500818 |
| ENSCAFG00000035090 | -1.006349504 | 0.008010664 |
| ENSCAFG00000035199 | 2.07300263   | 0.010484605 |
| ENSCAFG00000035325 | -2.093413811 | 0.000590218 |
| ENSCAFG00000035481 | -1.381384111 | 0.034922837 |
| ENSCAFG00000036055 | 1.535277971  | 0.005403628 |
| ENSCAFG00000036094 | -1.043466658 | 0.01636768  |
| ENSCAFG00000037282 | 3.739182512  | 0.00035113  |
| ENSCAFG00000037835 | -1.948492209 | 0.015096312 |
| ENSCAFG00000037891 | 1.136005698  | 0.000444791 |
| ENSCAFG00000038320 | -2.280863328 | 0.000535149 |
| ENSCAFG00000038408 | 1.863437754  | 0.002241063 |
| ENSCAFG00000038525 | -1.380440645 | 6.19E-08    |
| ENSCAFG00000038692 | -1.277799042 | 0.01923605  |
| ENSCAFG00000038722 | 3.048776788  | 0.038657025 |
| ENSCAFG00000039280 | 1.030014058  | 0.036862642 |
| ENSCAFG00000039524 | 5.979630986  | 0.040417525 |
| ENSCAFG00000039836 | 2.327484717  | 0.019148216 |
| ENSCAFG00000039851 | 1.897559504  | 0.025742449 |
| ENSCAFG00000040231 | -1.616911241 | 0.000127063 |
| ENSCAFG00000040365 | 2.896989593  | 0.025237029 |
| ENSCAFG00000040425 | -1.055143908 | 0.00985659  |
| ENSCAFG00000040440 | -1.017597659 | 0.02575049  |
| ENSCAFG00000040534 | 1.79037991   | 0.000318101 |
| ENSCAFG00000040611 | 2.06534937   | 0.04227302  |

Table S4: List of genes (as ensemble ID) presenting a Rescued expression profile in the Biceps femoris or in the Vastus lateralis of the dogs showing therapeutic benefits.

| Rescued Biceps     | Rescued Vastus     |  | Rescued Common     | Gene name |
|--------------------|--------------------|--|--------------------|-----------|
| ENSCAFG0000000097  | ENSCAFG0000000097  |  | ENSCAFG0000000097  | ERBB3     |
| ENSCAFG0000000110  | ENSCAFG0000000124  |  | ENSCAFG0000000124  | TIMELESS  |
| ENSCAFG0000000124  | ENSCAFG0000000420  |  | ENSCAFG0000000611  | MEGF10    |
| ENSCAFG0000000282  | ENSCAFG0000000426  |  | ENSCAFG00000001287 | TCP11     |
| ENSCAFG0000000288  | ENSCAFG0000000479  |  | ENSCAFG00000001556 | KCNK17    |
| ENSCAFG0000000372  | ENSCAFG0000000493  |  | ENSCAFG00000001596 | FOXP4     |
| ENSCAFG0000000413  | ENSCAFG0000000522  |  | ENSCAFG00000001649 | GCNT1     |
| ENSCAFG0000000448  | ENSCAFG0000000535  |  | ENSCAFG00000001793 | BTBD11    |
| ENSCAFG0000000523  | ENSCAFG0000000568  |  | ENSCAFG00000001909 | KIF24     |
| ENSCAFG0000000561  | ENSCAFG0000000569  |  | ENSCAFG00000002319 | KIAA1211L |
| ENSCAFG0000000611  | ENSCAFG0000000611  |  | ENSCAFG00000002830 | RIMS3     |
| ENSCAFG0000000722  | ENSCAFG0000000626  |  | ENSCAFG00000003096 | PM20D2    |
| ENSCAFG0000000733  | ENSCAFG0000000640  |  | ENSCAFG00000003775 | OSR1      |
| ENSCAFG0000000799  | ENSCAFG0000000641  |  | ENSCAFG00000003804 |           |
| ENSCAFG0000000886  | ENSCAFG0000000654  |  | ENSCAFG00000003960 | TRAF3IP2  |
| ENSCAFG0000000903  | ENSCAFG0000000671  |  | ENSCAFG00000004127 | SESN3     |
| ENSCAFG0000000934  | ENSCAFG0000000798  |  | ENSCAFG00000004297 | CCDC8     |
| ENSCAFG00000001007 | ENSCAFG0000000884  |  | ENSCAFG00000004331 |           |
| ENSCAFG00000001067 | ENSCAFG00000001126 |  | ENSCAFG00000004481 | SLC6A6    |
| ENSCAFG00000001085 | ENSCAFG00000001250 |  | ENSCAFG00000004636 | BCAM      |
| ENSCAFG00000001287 | ENSCAFG00000001287 |  | ENSCAFG00000004731 | TENM4     |
| ENSCAFG00000001346 | ENSCAFG00000001299 |  | ENSCAFG00000004746 | XRCC1     |
| ENSCAFG00000001450 | ENSCAFG00000001317 |  | ENSCAFG00000004769 | OPTN      |
| ENSCAFG00000001556 | ENSCAFG00000001324 |  | ENSCAFG00000004820 | ITGA9     |
| ENSCAFG00000001581 | ENSCAFG00000001453 |  | ENSCAFG00000004958 | ATP1A3    |
| ENSCAFG00000001596 | ENSCAFG00000001515 |  | ENSCAFG00000005294 | TK1       |
| ENSCAFG00000001649 | ENSCAFG00000001556 |  | ENSCAFG00000005348 | EHD3      |
| ENSCAFG00000001793 | ENSCAFG00000001596 |  | ENSCAFG00000005433 | ABCC4     |
| ENSCAFG00000001875 | ENSCAFG00000001649 |  | ENSCAFG00000005564 | UCP2      |
| ENSCAFG00000001909 | ENSCAFG00000001672 |  | ENSCAFG00000006006 | FASN      |
| ENSCAFG00000001923 | ENSCAFG00000001705 |  | ENSCAFG00000006053 |           |
| ENSCAFG00000002313 | ENSCAFG00000001793 |  | ENSCAFG00000006800 | FZD10     |
| ENSCAFG00000002319 | ENSCAFG00000001852 |  | ENSCAFG00000006877 | FAM110A   |
| ENSCAFG00000002517 | ENSCAFG00000001854 |  | ENSCAFG00000007562 | AMPD3     |
| ENSCAFG00000002549 | ENSCAFG00000001909 |  | ENSCAFG00000007945 | PROCR     |
| ENSCAFG00000002656 | ENSCAFG00000001966 |  | ENSCAFG00000008062 |           |
| ENSCAFG00000002719 | ENSCAFG00000002040 |  | ENSCAFG00000008319 | CHODL     |
| ENSCAFG00000002748 | ENSCAFG00000002042 |  | ENSCAFG00000008707 | CKMT2     |
| ENSCAFG00000002796 | ENSCAFG00000002053 |  | ENSCAFG00000008786 | NNAT      |
| ENSCAFG00000002830 | ENSCAFG00000002069 |  | ENSCAFG00000008977 | LRP4      |
| ENSCAFG00000002854 | ENSCAFG00000002079 |  | ENSCAFG00000009066 | MYOD1     |
| ENSCAFG00000002917 | ENSCAFG00000002098 |  | ENSCAFG00000009333 | CES1      |
| ENSCAFG00000002928 | ENSCAFG00000002116 |  | ENSCAFG00000009337 | TUBB2A    |
| ENSCAFG00000003096 | ENSCAFG00000002230 |  | ENSCAFG00000009673 |           |
| ENSCAFG00000003276 | ENSCAFG00000002319 |  | ENSCAFG00000009777 | NAV2      |
| ENSCAFG00000003327 | ENSCAFG00000002365 |  | ENSCAFG00000009978 | ETS2      |
| ENSCAFG00000003388 | ENSCAFG00000002420 |  | ENSCAFG00000010090 | IGF2      |

|                    |                    |                     |          |
|--------------------|--------------------|---------------------|----------|
| ENSCAFG00000003426 | ENSCAFG00000002432 | ENSCAFG000000010121 | CD81     |
| ENSCAFG00000003602 | ENSCAFG00000002576 | ENSCAFG000000010175 | CDH22    |
| ENSCAFG00000003663 | ENSCAFG00000002645 | ENSCAFG000000010288 | MYBPH    |
| ENSCAFG00000003676 | ENSCAFG00000002830 | ENSCAFG000000010309 | MYOG     |
| ENSCAFG00000003720 | ENSCAFG00000002927 | ENSCAFG000000010423 | COL4A4   |
| ENSCAFG00000003775 | ENSCAFG00000002948 | ENSCAFG000000010588 | MARCKSL1 |
| ENSCAFG00000003804 | ENSCAFG00000002974 | ENSCAFG000000010654 | AGPAT3   |
| ENSCAFG00000003824 | ENSCAFG00000003096 | ENSCAFG000000010936 | NPNT     |
| ENSCAFG00000003960 | ENSCAFG00000003105 | ENSCAFG000000011069 | GJA5     |
| ENSCAFG00000004034 | ENSCAFG00000003116 | ENSCAFG000000011283 | CHRND    |
| ENSCAFG00000004127 | ENSCAFG00000003268 | ENSCAFG000000011378 | ANKRD34A |
| ENSCAFG00000004129 | ENSCAFG00000003402 | ENSCAFG000000011823 | MN1      |
| ENSCAFG00000004176 | ENSCAFG00000003404 | ENSCAFG000000012095 | AHDC1    |
| ENSCAFG00000004279 | ENSCAFG00000003530 | ENSCAFG000000012376 | VASH2    |
| ENSCAFG00000004297 | ENSCAFG00000003579 | ENSCAFG000000012525 | MUC13    |
| ENSCAFG00000004331 | ENSCAFG00000003605 | ENSCAFG000000012742 | MTFP1    |
| ENSCAFG00000004481 | ENSCAFG00000003639 | ENSCAFG000000012803 | RIN1     |
| ENSCAFG00000004510 | ENSCAFG00000003775 | ENSCAFG000000012824 | SCN4B    |
| ENSCAFG00000004529 | ENSCAFG00000003797 | ENSCAFG000000012904 | CDK1     |
| ENSCAFG00000004555 | ENSCAFG00000003804 | ENSCAFG000000012925 | PHKA2    |
| ENSCAFG00000004589 | ENSCAFG00000003854 | ENSCAFG000000013020 | STMN3    |
| ENSCAFG00000004636 | ENSCAFG00000003960 | ENSCAFG000000013283 | CHRNA1   |
| ENSCAFG00000004731 | ENSCAFG00000004054 | ENSCAFG000000013423 | FUOM     |
| ENSCAFG00000004746 | ENSCAFG00000004124 | ENSCAFG000000013483 | TMEM120A |
| ENSCAFG00000004769 | ENSCAFG00000004127 | ENSCAFG000000013521 | POLA1    |
| ENSCAFG00000004820 | ENSCAFG00000004137 | ENSCAFG000000014054 | ACHE     |
| ENSCAFG00000004856 | ENSCAFG00000004232 | ENSCAFG000000014124 | CHCHD10  |
| ENSCAFG00000004931 | ENSCAFG00000004274 | ENSCAFG000000014308 | ALAS2    |
| ENSCAFG00000004958 | ENSCAFG00000004297 | ENSCAFG000000014310 | APEX2    |
| ENSCAFG00000005081 | ENSCAFG00000004331 | ENSCAFG000000014410 | CHST3    |
| ENSCAFG00000005122 | ENSCAFG00000004392 | ENSCAFG000000014448 | ZNF804A  |
| ENSCAFG00000005179 | ENSCAFG00000004402 | ENSCAFG000000014474 | IGFBP5   |
| ENSCAFG00000005276 | ENSCAFG00000004416 | ENSCAFG000000014551 | GAL3ST4  |
| ENSCAFG00000005294 | ENSCAFG00000004481 | ENSCAFG000000014978 |          |
| ENSCAFG00000005301 | ENSCAFG00000004632 | ENSCAFG000000015078 | FAM184B  |
| ENSCAFG00000005309 | ENSCAFG00000004636 | ENSCAFG000000015209 | TUBA4A   |
| ENSCAFG00000005348 | ENSCAFG00000004714 | ENSCAFG000000015217 |          |
| ENSCAFG00000005433 | ENSCAFG00000004731 | ENSCAFG000000015539 | PAX7     |
| ENSCAFG00000005468 | ENSCAFG00000004746 | ENSCAFG000000015788 | B4GALNT3 |
| ENSCAFG00000005564 | ENSCAFG00000004769 | ENSCAFG000000016072 |          |
| ENSCAFG00000005595 | ENSCAFG00000004801 | ENSCAFG000000016769 | NES      |
| ENSCAFG00000005621 | ENSCAFG00000004820 | ENSCAFG000000017615 | ST8SIA5  |
| ENSCAFG00000005768 | ENSCAFG00000004956 | ENSCAFG000000017705 | ARMCX2   |
| ENSCAFG00000005843 | ENSCAFG00000004958 | ENSCAFG000000017883 | NRK      |
| ENSCAFG00000005918 | ENSCAFG00000004991 | ENSCAFG000000018175 | CAPN6    |
| ENSCAFG00000005965 | ENSCAFG00000005051 | ENSCAFG000000018277 |          |
| ENSCAFG00000006006 | ENSCAFG00000005183 | ENSCAFG000000018360 |          |
| ENSCAFG00000006019 | ENSCAFG00000005255 | ENSCAFG000000018457 | NT5M     |
| ENSCAFG00000006053 | ENSCAFG00000005294 | ENSCAFG000000018643 | SLC25A23 |
| ENSCAFG00000006073 | ENSCAFG00000005348 | ENSCAFG000000018702 | EFCAB7   |

|                    |                    |                    |          |
|--------------------|--------------------|--------------------|----------|
| ENSCAFG00000006134 | ENSCAFG00000005365 | ENSCAFG00000018864 | GPC3     |
| ENSCAFG00000006164 | ENSCAFG00000005411 | ENSCAFG00000019014 | SEMA6B   |
| ENSCAFG00000006175 | ENSCAFG00000005433 | ENSCAFG00000019230 | ATP2B3   |
| ENSCAFG00000006234 | ENSCAFG00000005564 | ENSCAFG00000019489 | TP73     |
| ENSCAFG00000006373 | ENSCAFG00000005693 | ENSCAFG00000019601 | SOX8     |
| ENSCAFG00000006381 | ENSCAFG00000005723 | ENSCAFG00000020153 | MTSS1L   |
| ENSCAFG00000006424 | ENSCAFG00000005767 | ENSCAFG00000020166 | ANGPTL2  |
| ENSCAFG00000006474 | ENSCAFG00000005846 | ENSCAFG00000020345 | PTGFR    |
| ENSCAFG00000006513 | ENSCAFG00000005853 | ENSCAFG00000020713 | RF00279  |
| ENSCAFG00000006576 | ENSCAFG00000005960 | ENSCAFG00000022843 | MIR675   |
| ENSCAFG00000006596 | ENSCAFG00000005963 | ENSCAFG00000023904 | CHRNB4   |
| ENSCAFG00000006723 | ENSCAFG00000006006 | ENSCAFG00000024609 | CNTN2    |
| ENSCAFG00000006800 | ENSCAFG00000006022 | ENSCAFG00000025390 | SLC22A17 |
| ENSCAFG00000006877 | ENSCAFG00000006053 | ENSCAFG00000028459 | MT3      |
| ENSCAFG00000007001 | ENSCAFG00000006091 | ENSCAFG00000028490 |          |
| ENSCAFG00000007047 | ENSCAFG00000006100 | ENSCAFG00000028594 | RF01973  |
| ENSCAFG00000007079 | ENSCAFG00000006215 | ENSCAFG00000028647 | BGLAP    |
| ENSCAFG00000007111 | ENSCAFG00000006250 | ENSCAFG00000028653 |          |
| ENSCAFG00000007149 | ENSCAFG00000006264 | ENSCAFG00000028761 |          |
| ENSCAFG00000007338 | ENSCAFG00000006334 | ENSCAFG00000028817 | CFD      |
| ENSCAFG00000007562 | ENSCAFG00000006392 | ENSCAFG00000028947 | ELN      |
| ENSCAFG00000007635 | ENSCAFG00000006417 | ENSCAFG00000028958 | TCEAL7   |
| ENSCAFG00000007847 | ENSCAFG00000006528 | ENSCAFG00000029004 |          |
| ENSCAFG00000007893 | ENSCAFG00000006559 | ENSCAFG00000029304 | RF01972  |
| ENSCAFG00000007936 | ENSCAFG00000006563 | ENSCAFG00000029856 | RF01881  |
| ENSCAFG00000007945 | ENSCAFG00000006608 | ENSCAFG00000030198 |          |
| ENSCAFG00000007985 | ENSCAFG00000006612 | ENSCAFG00000031239 |          |
| ENSCAFG00000008062 | ENSCAFG00000006701 | ENSCAFG00000031481 |          |
| ENSCAFG00000008123 | ENSCAFG00000006740 | ENSCAFG00000031936 | NRBF2    |
| ENSCAFG00000008295 | ENSCAFG00000006745 | ENSCAFG00000032024 | GPR162   |
| ENSCAFG00000008309 | ENSCAFG00000006800 | ENSCAFG00000032043 |          |
| ENSCAFG00000008319 | ENSCAFG00000006877 | ENSCAFG00000032120 | C1QTNF6  |
| ENSCAFG00000008582 | ENSCAFG00000006909 | ENSCAFG00000032235 |          |
| ENSCAFG00000008707 | ENSCAFG00000006930 | ENSCAFG00000032286 |          |
| ENSCAFG00000008755 | ENSCAFG00000007036 | ENSCAFG00000032403 | MAP3K7CL |
| ENSCAFG00000008786 | ENSCAFG00000007045 | ENSCAFG00000032684 |          |
| ENSCAFG00000008795 | ENSCAFG00000007082 | ENSCAFG00000032896 |          |
| ENSCAFG00000008847 | ENSCAFG00000007261 | ENSCAFG00000033011 |          |
| ENSCAFG00000008975 | ENSCAFG00000007394 | ENSCAFG00000033248 |          |
| ENSCAFG00000008977 | ENSCAFG00000007407 | ENSCAFG00000033312 |          |
| ENSCAFG00000008978 | ENSCAFG00000007433 | ENSCAFG00000033759 |          |
| ENSCAFG00000009005 | ENSCAFG00000007440 | ENSCAFG00000035036 |          |
| ENSCAFG00000009066 | ENSCAFG00000007562 | ENSCAFG00000035199 |          |
| ENSCAFG00000009097 | ENSCAFG00000007626 | ENSCAFG00000038320 |          |
| ENSCAFG00000009104 | ENSCAFG00000007651 |                    |          |
| ENSCAFG00000009105 | ENSCAFG00000007653 |                    |          |
| ENSCAFG00000009149 | ENSCAFG00000007750 |                    |          |
| ENSCAFG00000009187 | ENSCAFG00000007845 |                    |          |
| ENSCAFG00000009329 | ENSCAFG00000007888 |                    |          |
| ENSCAFG00000009333 | ENSCAFG00000007945 |                    |          |

|                    |                    |
|--------------------|--------------------|
| ENSCAFG00000009337 | ENSCAFG00000008062 |
| ENSCAFG00000009441 | ENSCAFG00000008164 |
| ENSCAFG00000009506 | ENSCAFG00000008319 |
| ENSCAFG00000009596 | ENSCAFG00000008343 |
| ENSCAFG00000009649 | ENSCAFG00000008403 |
| ENSCAFG00000009664 | ENSCAFG00000008477 |
| ENSCAFG00000009673 | ENSCAFG00000008503 |
| ENSCAFG00000009721 | ENSCAFG00000008566 |
| ENSCAFG00000009777 | ENSCAFG00000008597 |
| ENSCAFG00000009869 | ENSCAFG00000008707 |
| ENSCAFG00000009951 | ENSCAFG00000008728 |
| ENSCAFG00000009978 | ENSCAFG00000008741 |
| ENSCAFG00000010077 | ENSCAFG00000008761 |
| ENSCAFG00000010090 | ENSCAFG00000008786 |
| ENSCAFG00000010121 | ENSCAFG00000008837 |
| ENSCAFG00000010142 | ENSCAFG00000008942 |
| ENSCAFG00000010175 | ENSCAFG00000008977 |
| ENSCAFG00000010186 | ENSCAFG00000008979 |
| ENSCAFG00000010288 | ENSCAFG00000009026 |
| ENSCAFG00000010309 | ENSCAFG00000009066 |
| ENSCAFG00000010423 | ENSCAFG00000009076 |
| ENSCAFG00000010588 | ENSCAFG00000009271 |
| ENSCAFG00000010654 | ENSCAFG00000009282 |
| ENSCAFG00000010815 | ENSCAFG00000009333 |
| ENSCAFG00000010823 | ENSCAFG00000009337 |
| ENSCAFG00000010883 | ENSCAFG00000009362 |
| ENSCAFG00000010925 | ENSCAFG00000009395 |
| ENSCAFG00000010936 | ENSCAFG00000009401 |
| ENSCAFG00000010982 | ENSCAFG00000009414 |
| ENSCAFG00000011067 | ENSCAFG00000009546 |
| ENSCAFG00000011069 | ENSCAFG00000009552 |
| ENSCAFG00000011086 | ENSCAFG00000009570 |
| ENSCAFG00000011283 | ENSCAFG00000009641 |
| ENSCAFG00000011336 | ENSCAFG00000009653 |
| ENSCAFG00000011348 | ENSCAFG00000009663 |
| ENSCAFG00000011378 | ENSCAFG00000009673 |
| ENSCAFG00000011426 | ENSCAFG00000009680 |
| ENSCAFG00000011458 | ENSCAFG00000009717 |
| ENSCAFG00000011498 | ENSCAFG00000009735 |
| ENSCAFG00000011605 | ENSCAFG00000009744 |
| ENSCAFG00000011646 | ENSCAFG00000009765 |
| ENSCAFG00000011652 | ENSCAFG00000009777 |
| ENSCAFG00000011744 | ENSCAFG00000009820 |
| ENSCAFG00000011745 | ENSCAFG00000009881 |
| ENSCAFG00000011817 | ENSCAFG00000009961 |
| ENSCAFG00000011823 | ENSCAFG00000009978 |
| ENSCAFG00000011977 | ENSCAFG00000010090 |
| ENSCAFG00000012022 | ENSCAFG00000010121 |
| ENSCAFG00000012039 | ENSCAFG00000010175 |
| ENSCAFG00000012046 | ENSCAFG00000010264 |



|                    |                    |
|--------------------|--------------------|
| ENSCAFG00000012095 | ENSCAFG00000010274 |
| ENSCAFG00000012222 | ENSCAFG00000010285 |
| ENSCAFG00000012376 | ENSCAFG00000010288 |
| ENSCAFG00000012525 | ENSCAFG00000010298 |
| ENSCAFG00000012556 | ENSCAFG00000010304 |
| ENSCAFG00000012742 | ENSCAFG00000010309 |
| ENSCAFG00000012803 | ENSCAFG00000010423 |
| ENSCAFG00000012824 | ENSCAFG00000010526 |
| ENSCAFG00000012860 | ENSCAFG00000010588 |
| ENSCAFG00000012904 | ENSCAFG00000010654 |
| ENSCAFG00000012925 | ENSCAFG00000010656 |
| ENSCAFG00000012963 | ENSCAFG00000010700 |
| ENSCAFG00000012979 | ENSCAFG00000010752 |
| ENSCAFG00000013020 | ENSCAFG00000010758 |
| ENSCAFG00000013030 | ENSCAFG00000010790 |
| ENSCAFG00000013098 | ENSCAFG00000010825 |
| ENSCAFG00000013195 | ENSCAFG00000010891 |
| ENSCAFG00000013199 | ENSCAFG00000010923 |
| ENSCAFG00000013283 | ENSCAFG00000010936 |
| ENSCAFG00000013367 | ENSCAFG00000011069 |
| ENSCAFG00000013423 | ENSCAFG00000011283 |
| ENSCAFG00000013483 | ENSCAFG00000011378 |
| ENSCAFG00000013500 | ENSCAFG00000011534 |
| ENSCAFG00000013521 | ENSCAFG00000011584 |
| ENSCAFG00000013627 | ENSCAFG00000011772 |
| ENSCAFG00000013728 | ENSCAFG00000011823 |
| ENSCAFG00000013735 | ENSCAFG00000011986 |
| ENSCAFG00000013778 | ENSCAFG00000012065 |
| ENSCAFG00000013909 | ENSCAFG00000012068 |
| ENSCAFG00000013990 | ENSCAFG00000012085 |
| ENSCAFG00000014049 | ENSCAFG00000012095 |
| ENSCAFG00000014054 | ENSCAFG00000012098 |
| ENSCAFG00000014120 | ENSCAFG00000012182 |
| ENSCAFG00000014124 | ENSCAFG00000012290 |
| ENSCAFG00000014237 | ENSCAFG00000012376 |
| ENSCAFG00000014308 | ENSCAFG00000012385 |
| ENSCAFG00000014310 | ENSCAFG00000012449 |
| ENSCAFG00000014410 | ENSCAFG00000012473 |
| ENSCAFG00000014448 | ENSCAFG00000012525 |
| ENSCAFG00000014451 | ENSCAFG00000012619 |
| ENSCAFG00000014453 | ENSCAFG00000012661 |
| ENSCAFG00000014474 | ENSCAFG00000012709 |
| ENSCAFG00000014490 | ENSCAFG00000012716 |
| ENSCAFG00000014551 | ENSCAFG00000012742 |
| ENSCAFG00000014627 | ENSCAFG00000012803 |
| ENSCAFG00000014777 | ENSCAFG00000012824 |
| ENSCAFG00000014835 | ENSCAFG00000012904 |
| ENSCAFG00000014968 | ENSCAFG00000012918 |
| ENSCAFG00000014978 | ENSCAFG00000012925 |
| ENSCAFG00000015078 | ENSCAFG00000012952 |

|                    |                    |
|--------------------|--------------------|
| ENSCAFG00000015209 | ENSCAFG00000013011 |
| ENSCAFG00000015217 | ENSCAFG00000013020 |
| ENSCAFG00000015256 | ENSCAFG00000013039 |
| ENSCAFG00000015326 | ENSCAFG00000013283 |
| ENSCAFG00000015345 | ENSCAFG00000013297 |
| ENSCAFG00000015539 | ENSCAFG00000013305 |
| ENSCAFG00000015625 | ENSCAFG00000013322 |
| ENSCAFG00000015731 | ENSCAFG00000013353 |
| ENSCAFG00000015788 | ENSCAFG00000013423 |
| ENSCAFG00000015902 | ENSCAFG00000013427 |
| ENSCAFG00000015903 | ENSCAFG00000013483 |
| ENSCAFG00000015918 | ENSCAFG00000013489 |
| ENSCAFG00000016072 | ENSCAFG00000013521 |
| ENSCAFG00000016192 | ENSCAFG00000013694 |
| ENSCAFG00000016265 | ENSCAFG00000013723 |
| ENSCAFG00000016338 | ENSCAFG00000013756 |
| ENSCAFG00000016423 | ENSCAFG00000013774 |
| ENSCAFG00000016479 | ENSCAFG00000013844 |
| ENSCAFG00000016550 | ENSCAFG00000013874 |
| ENSCAFG00000016679 | ENSCAFG00000013961 |
| ENSCAFG00000016755 | ENSCAFG00000014054 |
| ENSCAFG00000016769 | ENSCAFG00000014124 |
| ENSCAFG00000016811 | ENSCAFG00000014308 |
| ENSCAFG00000016828 | ENSCAFG00000014310 |
| ENSCAFG00000017050 | ENSCAFG00000014319 |
| ENSCAFG00000017080 | ENSCAFG00000014323 |
| ENSCAFG00000017326 | ENSCAFG00000014338 |
| ENSCAFG00000017329 | ENSCAFG00000014343 |
| ENSCAFG00000017397 | ENSCAFG00000014410 |
| ENSCAFG00000017612 | ENSCAFG00000014413 |
| ENSCAFG00000017615 | ENSCAFG00000014443 |
| ENSCAFG00000017655 | ENSCAFG00000014448 |
| ENSCAFG00000017702 | ENSCAFG00000014474 |
| ENSCAFG00000017705 | ENSCAFG00000014476 |
| ENSCAFG00000017883 | ENSCAFG00000014551 |
| ENSCAFG00000018017 | ENSCAFG00000014568 |
| ENSCAFG00000018020 | ENSCAFG00000014583 |
| ENSCAFG00000018047 | ENSCAFG00000014616 |
| ENSCAFG00000018127 | ENSCAFG00000014668 |
| ENSCAFG00000018175 | ENSCAFG00000014679 |
| ENSCAFG00000018194 | ENSCAFG00000014767 |
| ENSCAFG00000018277 | ENSCAFG00000014812 |
| ENSCAFG00000018314 | ENSCAFG00000014838 |
| ENSCAFG00000018360 | ENSCAFG00000014978 |
| ENSCAFG00000018405 | ENSCAFG00000015078 |
| ENSCAFG00000018415 | ENSCAFG00000015091 |
| ENSCAFG00000018457 | ENSCAFG00000015209 |
| ENSCAFG00000018560 | ENSCAFG00000015217 |
| ENSCAFG00000018576 | ENSCAFG00000015233 |
| ENSCAFG00000018586 | ENSCAFG00000015235 |

|                    |                    |
|--------------------|--------------------|
| ENSCAFG00000018602 | ENSCAFG00000015272 |
| ENSCAFG00000018621 | ENSCAFG00000015298 |
| ENSCAFG00000018643 | ENSCAFG00000015427 |
| ENSCAFG00000018670 | ENSCAFG00000015539 |
| ENSCAFG00000018702 | ENSCAFG00000015662 |
| ENSCAFG00000018761 | ENSCAFG00000015695 |
| ENSCAFG00000018785 | ENSCAFG00000015788 |
| ENSCAFG00000018825 | ENSCAFG00000015920 |
| ENSCAFG00000018864 | ENSCAFG00000015936 |
| ENSCAFG00000018959 | ENSCAFG00000015943 |
| ENSCAFG00000018982 | ENSCAFG00000015968 |
| ENSCAFG00000019014 | ENSCAFG00000016022 |
| ENSCAFG00000019134 | ENSCAFG00000016072 |
| ENSCAFG00000019166 | ENSCAFG00000016142 |
| ENSCAFG00000019177 | ENSCAFG00000016298 |
| ENSCAFG00000019183 | ENSCAFG00000016410 |
| ENSCAFG00000019189 | ENSCAFG00000016465 |
| ENSCAFG00000019230 | ENSCAFG00000016518 |
| ENSCAFG00000019242 | ENSCAFG00000016590 |
| ENSCAFG00000019489 | ENSCAFG00000016602 |
| ENSCAFG00000019541 | ENSCAFG00000016615 |
| ENSCAFG00000019601 | ENSCAFG00000016671 |
| ENSCAFG00000019694 | ENSCAFG00000016769 |
| ENSCAFG00000019764 | ENSCAFG00000016850 |
| ENSCAFG00000019837 | ENSCAFG00000016983 |
| ENSCAFG00000019852 | ENSCAFG00000016984 |
| ENSCAFG00000019914 | ENSCAFG00000017008 |
| ENSCAFG00000019956 | ENSCAFG00000017018 |
| ENSCAFG00000019964 | ENSCAFG00000017064 |
| ENSCAFG00000020004 | ENSCAFG00000017099 |
| ENSCAFG00000020110 | ENSCAFG00000017137 |
| ENSCAFG00000020133 | ENSCAFG00000017428 |
| ENSCAFG00000020145 | ENSCAFG00000017615 |
| ENSCAFG00000020153 | ENSCAFG00000017635 |
| ENSCAFG00000020166 | ENSCAFG00000017705 |
| ENSCAFG00000020270 | ENSCAFG00000017883 |
| ENSCAFG00000020345 | ENSCAFG00000017937 |
| ENSCAFG00000020713 | ENSCAFG00000017952 |
| ENSCAFG00000022843 | ENSCAFG00000018175 |
| ENSCAFG00000023094 | ENSCAFG00000018197 |
| ENSCAFG00000023339 | ENSCAFG00000018272 |
| ENSCAFG00000023757 | ENSCAFG00000018277 |
| ENSCAFG00000023759 | ENSCAFG00000018323 |
| ENSCAFG00000023904 | ENSCAFG00000018360 |
| ENSCAFG00000024609 | ENSCAFG00000018422 |
| ENSCAFG00000024731 | ENSCAFG00000018457 |
| ENSCAFG00000024901 | ENSCAFG00000018461 |
| ENSCAFG00000024908 | ENSCAFG00000018506 |
| ENSCAFG00000025213 | ENSCAFG00000018527 |
| ENSCAFG00000025295 | ENSCAFG00000018556 |

|                    |                    |
|--------------------|--------------------|
| ENSCAFG00000025390 | ENSCAFG00000018591 |
| ENSCAFG00000025555 | ENSCAFG00000018643 |
| ENSCAFG00000028459 | ENSCAFG00000018702 |
| ENSCAFG00000028490 | ENSCAFG00000018787 |
| ENSCAFG00000028544 | ENSCAFG00000018828 |
| ENSCAFG00000028594 | ENSCAFG00000018864 |
| ENSCAFG00000028636 | ENSCAFG00000018939 |
| ENSCAFG00000028647 | ENSCAFG00000019014 |
| ENSCAFG00000028653 | ENSCAFG00000019071 |
| ENSCAFG00000028761 | ENSCAFG00000019130 |
| ENSCAFG00000028802 | ENSCAFG00000019194 |
| ENSCAFG00000028808 | ENSCAFG00000019230 |
| ENSCAFG00000028817 | ENSCAFG00000019237 |
| ENSCAFG00000028877 | ENSCAFG00000019445 |
| ENSCAFG00000028947 | ENSCAFG00000019451 |
| ENSCAFG00000028958 | ENSCAFG00000019489 |
| ENSCAFG00000028982 | ENSCAFG00000019567 |
| ENSCAFG00000029004 | ENSCAFG00000019601 |
| ENSCAFG00000029130 | ENSCAFG00000019662 |
| ENSCAFG00000029304 | ENSCAFG00000019829 |
| ENSCAFG00000029322 | ENSCAFG00000019834 |
| ENSCAFG00000029381 | ENSCAFG00000019928 |
| ENSCAFG00000029612 | ENSCAFG00000020024 |
| ENSCAFG00000029673 | ENSCAFG00000020094 |
| ENSCAFG00000029856 | ENSCAFG00000020153 |
| ENSCAFG00000029937 | ENSCAFG00000020166 |
| ENSCAFG00000030025 | ENSCAFG00000020294 |
| ENSCAFG00000030105 | ENSCAFG00000020340 |
| ENSCAFG00000030120 | ENSCAFG00000020345 |
| ENSCAFG00000030170 | ENSCAFG00000020524 |
| ENSCAFG00000030198 | ENSCAFG00000020633 |
| ENSCAFG00000030242 | ENSCAFG00000020713 |
| ENSCAFG00000030310 | ENSCAFG00000022709 |
| ENSCAFG00000030348 | ENSCAFG00000022711 |
| ENSCAFG00000030412 | ENSCAFG00000022723 |
| ENSCAFG00000030416 | ENSCAFG00000022728 |
| ENSCAFG00000030425 | ENSCAFG00000022741 |
| ENSCAFG00000030538 | ENSCAFG00000022843 |
| ENSCAFG00000030662 | ENSCAFG00000023152 |
| ENSCAFG00000030686 | ENSCAFG00000023538 |
| ENSCAFG00000030835 | ENSCAFG00000023904 |
| ENSCAFG00000030867 | ENSCAFG00000024028 |
| ENSCAFG00000030932 | ENSCAFG00000024187 |
| ENSCAFG00000031172 | ENSCAFG00000024406 |
| ENSCAFG00000031239 | ENSCAFG00000024609 |
| ENSCAFG00000031299 | ENSCAFG00000024646 |
| ENSCAFG00000031392 | ENSCAFG00000024981 |
| ENSCAFG00000031481 | ENSCAFG00000025390 |
| ENSCAFG00000031894 | ENSCAFG00000025426 |
| ENSCAFG00000031936 | ENSCAFG00000025533 |

|                    |                    |
|--------------------|--------------------|
| ENSCAFG00000031938 | ENSCAFG00000027573 |
| ENSCAFG00000032024 | ENSCAFG00000028459 |
| ENSCAFG00000032029 | ENSCAFG00000028490 |
| ENSCAFG00000032032 | ENSCAFG00000028506 |
| ENSCAFG00000032043 | ENSCAFG00000028594 |
| ENSCAFG00000032089 | ENSCAFG00000028647 |
| ENSCAFG00000032120 | ENSCAFG00000028653 |
| ENSCAFG00000032235 | ENSCAFG00000028708 |
| ENSCAFG00000032286 | ENSCAFG00000028761 |
| ENSCAFG00000032392 | ENSCAFG00000028779 |
| ENSCAFG00000032403 | ENSCAFG00000028785 |
| ENSCAFG00000032684 | ENSCAFG00000028817 |
| ENSCAFG00000032697 | ENSCAFG00000028947 |
| ENSCAFG00000032896 | ENSCAFG00000028958 |
| ENSCAFG00000033011 | ENSCAFG00000029004 |
| ENSCAFG00000033248 | ENSCAFG00000029304 |
| ENSCAFG00000033312 | ENSCAFG00000029359 |
| ENSCAFG00000033759 | ENSCAFG00000029425 |
| ENSCAFG00000034213 | ENSCAFG00000029474 |
| ENSCAFG00000034853 | ENSCAFG00000029856 |
| ENSCAFG00000034881 | ENSCAFG00000029969 |
| ENSCAFG00000035036 | ENSCAFG00000030058 |
| ENSCAFG00000035199 | ENSCAFG00000030198 |
| ENSCAFG00000035834 | ENSCAFG00000030320 |
| ENSCAFG00000036200 | ENSCAFG00000030445 |
| ENSCAFG00000036350 | ENSCAFG00000030466 |
| ENSCAFG00000037515 | ENSCAFG00000030588 |
| ENSCAFG00000037835 | ENSCAFG00000030617 |
| ENSCAFG00000038320 | ENSCAFG00000030715 |
| ENSCAFG00000038468 | ENSCAFG00000030875 |
| ENSCAFG00000038545 | ENSCAFG00000030990 |
| ENSCAFG00000038812 | ENSCAFG00000030999 |
|                    | ENSCAFG00000031124 |
|                    | ENSCAFG00000031234 |
|                    | ENSCAFG00000031239 |
|                    | ENSCAFG00000031437 |
|                    | ENSCAFG00000031481 |
|                    | ENSCAFG00000031706 |
|                    | ENSCAFG00000031759 |
|                    | ENSCAFG00000031936 |
|                    | ENSCAFG00000031973 |
|                    | ENSCAFG00000032024 |
|                    | ENSCAFG00000032043 |
|                    | ENSCAFG00000032112 |
|                    | ENSCAFG00000032120 |
|                    | ENSCAFG00000032127 |
|                    | ENSCAFG00000032147 |
|                    | ENSCAFG00000032235 |
|                    | ENSCAFG00000032286 |
|                    | ENSCAFG00000032331 |

ENSCAFG00000032339  
ENSCAFG00000032391  
ENSCAFG00000032403  
ENSCAFG00000032412  
ENSCAFG00000032457  
ENSCAFG00000032489  
ENSCAFG00000032569  
ENSCAFG00000032571  
ENSCAFG00000032608  
ENSCAFG00000032684  
ENSCAFG00000032896  
ENSCAFG00000032930  
ENSCAFG00000033011  
ENSCAFG00000033086  
ENSCAFG00000033248  
ENSCAFG00000033312  
ENSCAFG00000033759  
ENSCAFG00000035036  
ENSCAFG00000035199  
ENSCAFG00000035325  
ENSCAFG00000035481  
ENSCAFG00000037282  
ENSCAFG00000037891  
ENSCAFG00000038320  
ENSCAFG00000038722  
ENSCAFG00000039524  
ENSCAFG00000039836  
ENSCAFG00000039851  
ENSCAFG00000040231  
ENSCAFG00000040365  
ENSCAFG00000040534  
ENSCAFG00000040611

| ensembl ID         | Gene name | log FC Vastus | Pvalue Vastus | logFC Biceps | Pvalue Biceps |
|--------------------|-----------|---------------|---------------|--------------|---------------|
| ENSCAFG00000020166 | ANGPTL2   | 2.573477699   | 7.16E-11      | 2.637073401  | 3.37E-08      |
| ENSCAFG00000007945 | PROCR     | 2.330769255   | 2.51E-10      | 2.120957359  | 4.34E-05      |
| ENSCAFG00000017883 | NRK       | 4.56944269    | 2.99E-09      | 5.018412332  | 3.84E-05      |
| ENSCAFG00000014308 | ALAS2     | 2.022795179   | 4.53E-09      | 1.551459344  | 0.000124881   |
| ENSCAFG00000008977 | LRP4      | 2.637229703   | 4.82E-08      | 1.641310401  | 0.005441352   |
| ENSCAFG00000014978 | PIK3R2    | 2.333590538   | 1.59E-07      | 1.513989504  | 0.000142868   |
| ENSCAFG00000014310 | APEX2     | 2.030600222   | 2.09E-07      | 1.530155574  | 0.000101844   |
| ENSCAFG00000009978 | ETS2      | 1.883296077   | 3.39E-07      | 1.876608064  | 7.08E-05      |
| ENSCAFG00000018702 | EFCAB7    | -2.524855109  | 9.40E-07      | -2.44506268  | 0.000325149   |
| ENSCAFG00000012803 | RIN1      | 3.155806278   | 1.42E-06      | 3.401147284  | 4.51E-07      |
| ENSCAFG00000012095 | AHDC1     | 1.437749831   | 1.51E-06      | 1.115106058  | 6.09E-05      |
| ENSCAFG0000001596  | FOXP4     | 2.091095449   | 3.82E-06      | 1.408734717  | 0.002101039   |
| ENSCAFG00000010121 | CD81      | 1.393565596   | 4.59E-06      | 1.451217502  | 7.66E-05      |
| ENSCAFG00000018457 | NT5M      | -2.678846074  | 5.02E-06      | -1.919813512 | 0.003964532   |
| ENSCAFG00000020153 | MTSS1L    | 1.737018296   | 5.57E-06      | 1.5078105    | 0.000541826   |
| ENSCAFG00000015078 | FAM184B   | 2.420010828   | 7.78E-06      | 2.424280973  | 0.000886408   |
| ENSCAFG00000002830 | RIMS3     | -3.512294484  | 1.20E-05      | -3.999533931 | 1.15E-05      |
| ENSCAFG00000010090 | IGF2      | 3.240827274   | 1.30E-05      | 3.259644778  | 6.39E-07      |
| ENSCAFG00000015217 | NA        | -2.109544247  | 1.43E-05      | -1.689554354 | 0.013928389   |
| ENSCAFG00000006877 | FAM110A   | 1.963890232   | 1.43E-05      | 2.131168973  | 0.002638577   |
| ENSCAFG00000009337 | TUBB2A    | 3.250224395   | 1.47E-05      | 3.341008052  | 1.38E-06      |
| ENSCAFG00000013423 | FUOM      | -2.263366815  | 1.50E-05      | -1.046372489 | 0.044613704   |
| ENSCAFG00000028817 | CFD       | 1.662655693   | 1.54E-05      | 1.380211507  | 0.013706042   |
| ENSCAFG00000028459 | MT3       | 6.12600805    | 1.89E-05      | 2.874403739  | 0.000442778   |
| ENSCAFG00000032896 | NA        | 2.943493356   | 2.03E-05      | 1.965894354  | 0.001311705   |
| ENSCAFG00000015209 | TUBA4A    | -2.085553592  | 2.82E-05      | -1.515768766 | 0.021585318   |
| ENSCAFG00000013521 | POLA1     | 1.384198517   | 3.01E-05      | 1.077368258  | 0.000995174   |
| ENSCAFG00000002319 | KIAA1211L | 3.749003388   | 3.44E-05      | 1.907256967  | 0.009845522   |
| ENSCAFG00000013283 | CHRNA1    | 3.815468255   | 3.47E-05      | 2.96060933   | 6.85E-06      |
| ENSCAFG00000010288 | MYBPH     | 5.729872752   | 5.01E-05      | 3.526195702  | 0.000133461   |
| ENSCAFG00000033248 | NA        | -3.429665114  | 6.00E-05      | -3.896208293 | 5.12E-05      |
| ENSCAFG0000003775  | OSR1      | 2.733224827   | 6.01E-05      | 3.071399948  | 0.001363765   |
| ENSCAFG00000032024 | GPR162    | -2.463949496  | 6.21E-05      | -2.026932174 | 0.018745273   |
| ENSCAFG0000001556  | KCNK17    | 2.305177845   | 7.20E-05      | 1.911230967  | 0.003774034   |
| ENSCAFG00000013483 | TMEM120A  | -1.405061093  | 7.87E-05      | -1.025962526 | 0.045893036   |
| ENSCAFG00000004127 | SESN3     | 2.678404538   | 7.91E-05      | 2.238837004  | 0.000578787   |
| ENSCAFG00000014448 | ZNF804A   | 3.324081824   | 8.51E-05      | 2.829881295  | 0.000117067   |
| ENSCAFG00000005564 | UCP2      | 1.582672682   | 9.22E-05      | 1.729419299  | 4.62E-05      |
| ENSCAFG00000017705 | ARMCX2    | 2.602599203   | 9.83E-05      | 2.429860868  | 5.15E-05      |
| ENSCAFG00000009673 | NA        | -1.451656986  | 0.000133089   | -1.369613923 | 0.004272252   |
| ENSCAFG00000001649 | GCNT1     | 3.056173032   | 0.000239287   | 1.866030583  | 0.025295475   |
| ENSCAFG00000032403 | MAP3K7CL  | 2.373587607   | 0.000262929   | 1.506872976  | 0.010099551   |
| ENSCAFG00000032286 | NA        | 3.21861502    | 0.000368607   | 1.466980073  | 0.01471161    |
| ENSCAFG00000006053 | NA        | 2.410434605   | 0.000370765   | 2.246004545  | 1.22E-06      |
| ENSCAFG00000023904 | CHRNB4    | 2.994776744   | 0.000373308   | 2.26396907   | 0.009967129   |
| ENSCAFG00000028947 | ELN       | 2.210170418   | 0.000433772   | 1.864150435  | 0.004925185   |
| ENSCAFG00000019014 | SEMA6B    | 2.027154129   | 0.000466259   | 2.048619684  | 0.000561256   |
| ENSCAFG00000032684 | NA        | 3.042024837   | 0.000473205   | 1.437491761  | 0.020298494   |
| ENSCAFG00000003096 | PM20D2    | 1.866701978   | 0.000482124   | 2.336963026  | 0.004242597   |
| ENSCAFG00000018864 | GPC3      | 3.637905291   | 0.000488242   | 2.009393493  | 0.015967856   |
| ENSCAFG00000004331 | PIK3R3    | 2.077663616   | 0.000552383   | 1.270081878  | 0.039598955   |
| ENSCAFG00000031239 | NA        | 3.005095626   | 0.000570039   | 1.531756813  | 0.018976557   |
| ENSCAFG00000028647 | BGLAP     | 2.961988926   | 0.000994914   | 2.262867137  | 0.003702656   |
| ENSCAFG00000028958 | TCEAL7    | 2.531827754   | 0.001014956   | 3.720930568  | 0.000117802   |
| ENSCAFG00000030198 | NA        | 2.498094202   | 0.001063778   | 2.038077922  | 0.027056915   |

|                    |          |              |             |              |             |
|--------------------|----------|--------------|-------------|--------------|-------------|
| ENSCAFG00000018360 | NA       | 3.632723822  | 0.001075597 | 4.532980409  | 9.56E-05    |
| ENSCAFG00000031481 | NA       | -3.618944662 | 0.001123586 | -2.091596739 | 0.004392384 |
| ENSCAFG00000004746 | XRCC1    | 1.336406212  | 0.001164325 | 1.493674945  | 0.000464378 |
| ENSCAFG00000009333 | CESdD1   | -2.376497003 | 0.001251065 | -3.438820309 | 0.001873815 |
| ENSCAFG00000015539 | PAX7     | 1.395532008  | 0.0013233   | 1.49491956   | 0.01514561  |
| ENSCAFG00000012904 | CDK1     | 1.762730567  | 0.001338037 | 1.86908997   | 0.0303179   |
| ENSCAFG00000000611 | MEGF10   | 1.239697597  | 0.001356059 | 1.043025106  | 0.022379382 |
| ENSCAFG00000004297 | CCDC8    | 3.386229398  | 0.001407136 | 3.579305268  | 4.82E-08    |
| ENSCAFG00000008062 | NA       | -1.837269893 | 0.001471419 | -2.65424783  | 0.003323827 |
| ENSCAFG00000032043 | NA       | -2.20433237  | 0.001678703 | -1.939727179 | 0.001209714 |
| ENSCAFG00000001909 | KIF24    | 1.81716916   | 0.001685762 | 1.588874132  | 0.019182574 |
| ENSCAFG00000011283 | CHRND    | 4.316764066  | 0.001712996 | 3.55885821   | 0.000866569 |
| ENSCAFG00000024609 | CNTN2    | 2.872419854  | 0.001725726 | 2.173429773  | 0.001163142 |
| ENSCAFG00000028761 | NA       | 1.789993968  | 0.001797349 | 1.358414372  | 0.04874407  |
| ENSCAFG00000029004 | NA       | -1.599186648 | 0.002268363 | -1.282023553 | 0.000261259 |
| ENSCAFG00000004731 | TENM4    | 1.9804845    | 0.002295963 | 1.215926441  | 0.015058305 |
| ENSCAFG00000016769 | NES      | 1.905412123  | 0.002378304 | 1.588578298  | 0.000185377 |
| ENSCAFG00000004820 | ITGA9    | 1.722472476  | 0.00240463  | 1.745010553  | 0.011866798 |
| ENSCAFG00000010654 | AGPAT3   | -1.181973406 | 0.002425076 | -1.539330593 | 0.000540829 |
| ENSCAFG00000004481 | SLC6A6   | 1.975231116  | 0.002518781 | 1.469677251  | 0.01518367  |
| ENSCAFG00000012824 | SCN4B    | -1.59412924  | 0.002692617 | -1.504353536 | 0.011297857 |
| ENSCAFG00000006006 | FASN     | 1.832543195  | 0.002831356 | 1.294402294  | 0.001018038 |
| ENSCAFG00000028653 | NA       | 3.005018503  | 0.002895369 | 1.907294955  | 0.005967732 |
| ENSCAFG00000000097 | ERBB3    | 2.836526719  | 0.003004938 | 1.998549435  | 0.033243834 |
| ENSCAFG00000018277 | CKB      | 2.255816402  | 0.003192217 | 2.127094967  | 0.002477956 |
| ENSCAFG00000025390 | SLC22A17 | 2.258264891  | 0.003516952 | 2.037490459  | 7.29E-05    |
| ENSCAFG00000012376 | VASH2    | 2.084699386  | 0.003572492 | 2.13234889   | 0.002908275 |
| ENSCAFG00000018643 | SLC25A23 | 1.637985631  | 0.003785276 | 2.196647327  | 0.001546382 |
| ENSCAFG00000004636 | BCAM     | 1.431501768  | 0.004542265 | 1.295091518  | 0.003081894 |
| ENSCAFG00000010936 | NPNT     | 2.260581185  | 0.005488884 | 3.560697738  | 2.55E-06    |
| ENSCAFG00000017615 | ST8SIA5  | -1.236747114 | 0.005677044 | -1.110632021 | 0.005813318 |
| ENSCAFG00000014054 | ACHE     | 2.39967239   | 0.005847406 | 1.710129314  | 0.048663979 |
| ENSCAFG00000022843 | NA       | 2.622702983  | 0.006007069 | 3.958896054  | 3.01E-05    |
| ENSCAFG00000019230 | ATP2B3   | 1.951482529  | 0.006389196 | 1.70976847   | 0.048857846 |
| ENSCAFG00000012525 | MUC13    | 3.62251399   | 0.006464476 | 4.227125415  | 3.81E-05    |
| ENSCAFG00000001793 | BTBD11   | 1.551643808  | 0.00653172  | 1.598625367  | 0.000403856 |
| ENSCAFG00000005433 | ABCC4    | -1.235849924 | 0.006665142 | -1.052007752 | 0.023438786 |
| ENSCAFG00000029304 | NA       | 2.581346343  | 0.006723539 | 4.270157482  | 7.95E-06    |
| ENSCAFG00000028490 | NA       | 2.134516548  | 0.008739537 | 1.789188253  | 0.032227547 |
| ENSCAFG00000010309 | MYOG     | 1.52088885   | 0.009245696 | 1.845085992  | 0.000214655 |
| ENSCAFG00000028594 | NA       | 2.538790086  | 0.009764673 | 3.791728862  | 3.18E-05    |
| ENSCAFG00000020345 | PTGFR    | -1.882157801 | 0.009963985 | -2.753228159 | 0.00230441  |
| ENSCAFG00000007562 | AMPD3    | 1.849416153  | 0.01014497  | 2.671833403  | 0.002075467 |
| ENSCAFG00000014124 | CHCHD10  | -1.597283739 | 0.010210759 | -1.340562915 | 0.001679647 |
| ENSCAFG00000035199 | NA       | 2.07300263   | 0.010484605 | 3.601068114  | 0.000318009 |
| ENSCAFG00000016072 | NA       | 1.103191687  | 0.011734775 | 1.667366588  | 0.014967357 |
| ENSCAFG00000004769 | OPTN     | -1.512936657 | 0.011889457 | -1.375357781 | 2.56E-05    |
| ENSCAFG00000012742 | MTFP1    | -1.929641457 | 0.012633578 | -1.538109123 | 0.002995437 |
| ENSCAFG00000014410 | CHST3    | 1.156284932  | 0.012681418 | 1.108767486  | 0.029641832 |
| ENSCAFG00000000124 | TIMELESS | 1.393514773  | 0.013025503 | 1.664271664  | 0.000601602 |
| ENSCAFG00000014551 | GAL3ST4  | 1.729897576  | 0.013455288 | 1.78265139   | 0.023465333 |
| ENSCAFG00000008707 | CKMT2    | -1.513175637 | 0.014869607 | -1.217424522 | 0.002846116 |
| ENSCAFG00000033011 | NA       | -2.743409349 | 0.015945439 | -2.74985822  | 0.019972755 |
| ENSCAFG00000008786 | NNAT     | 1.385895771  | 0.017606039 | 1.860409249  | 0.000386359 |
| ENSCAFG00000004958 | ATP1A3   | -1.916108938 | 0.019185539 | -2.120277144 | 0.002303361 |
| ENSCAFG00000035036 | NA       | -1.682876794 | 0.019500818 | -1.834187032 | 0.024883428 |



|                    |          |              |             |              |             |
|--------------------|----------|--------------|-------------|--------------|-------------|
| ENSCAFG00000010175 | CDH22    | -1.376839677 | 0.019541391 | -2.459550185 | 0.001622257 |
| ENSCAFG00000005294 | TK1      | 1.370300308  | 0.020792332 | 1.779067613  | 1.88E-05    |
| ENSCAFG00000029856 | NA       | 10.4738747   | 0.020926299 | 8.020069827  | 0.020049372 |
| ENSCAFG00000032235 | NA       | 1.063675433  | 0.022272439 | 1.144905011  | 0.008093552 |
| ENSCAFG00000010588 | MARCKSL1 | 1.800448811  | 0.022793028 | 2.770710906  | 0.002324573 |
| ENSCAFG00000005348 | EHD3     | 1.844069921  | 0.025868063 | 1.994919366  | 0.010967516 |
| ENSCAFG00000011378 | ANKRD34A | 1.637426544  | 0.027794058 | 2.50229108   | 0.016144896 |
| ENSCAFG00000009066 | MYOD1    | 1.704728854  | 0.029840809 | 1.279295476  | 0.017776792 |
| ENSCAFG00000012925 | PHKA2    | 1.382655474  | 0.032619048 | 1.307547992  | 0.04544663  |

Table S6: Correlation analysis between the expression changes observed in XLMTM dogs and Mtm1 KO mice for the 87 differentially expressed genes detected in both species.

| ensembl ID         | Gene name | log FC dogs  | log FC mice |
|--------------------|-----------|--------------|-------------|
| ENSCAFG00000011513 | ABLIM1    | 1.73670291   | 1.489       |
| ENSCAFG00000012181 | ACTC1     | 3.772649425  | -2.867      |
| ENSCAFG00000016453 | ADGRL1    | 1.307586207  | -0.711      |
| ENSCAFG00000012013 | ANPEP     | 1.834642459  | 1.053       |
| ENSCAFG00000016550 | ASB12     | -1.234678707 | -0.766      |
| ENSCAFG00000010942 | CCDC91    | -1.22278308  | -0.919      |
| ENSCAFG00000029853 | CDKN1A    | 2.880122608  | 3.665       |
| ENSCAFG00000013283 | CHRNA1    | 3.815468255  | 2.206       |
| ENSCAFG00000011283 | CHRND     | 4.316764066  | 3.037       |
| ENSCAFG00000024807 | CHRNA1    | 6.422497873  | 3.662       |
| ENSCAFG00000017138 | CILP      | 2.340963786  | 3.274       |
| ENSCAFG00000006035 | COL6A6    | 1.373634224  | -0.721      |
| ENSCAFG00000008761 | CX3CL1    | -1.631523824 | 2.749       |
| ENSCAFG00000006231 | DCLK1     | 3.592784876  | 1.394       |
| ENSCAFG00000009653 | DOP1B     | 2.080276665  | -0.853      |
| ENSCAFG00000002919 | EFEMP1    | 1.429460589  | -0.953      |
| ENSCAFG00000011772 | EGLN1     | -1.064307644 | -0.655      |
| ENSCAFG00000009869 | EHD4      | 1.260345827  | 0.824       |
| ENSCAFG00000018959 | EMP2      | 1.219309968  | 1.535       |
| ENSCAFG00000014323 | EPHB2     | 2.391796378  | 1.419       |
| ENSCAFG00000028669 | FAM171B   | 1.876683757  | 1.347       |
| ENSCAFG00000015272 | FGFBP1    | -3.536343867 | -3.299      |
| ENSCAFG00000016518 | FGFR4     | 1.145955705  | -1.779      |
| ENSCAFG00000002105 | FHL2      | 1.817158446  | 1.826       |
| ENSCAFG00000006019 | FREM2     | 1.997135963  | 1.959       |
| ENSCAFG00000018405 | FST       | 4.433409456  | 1.519       |
| ENSCAFG00000006421 | GAS6      | -1.009584253 | 0.808       |
| ENSCAFG00000012428 | HES6      | 1.36513027   | 0.876       |
| ENSCAFG00000002576 | HIVEP3    | 2.159868089  | 1.269       |
| ENSCAFG00000009074 | HOMER1    | -1.107945461 | -1.426      |
| ENSCAFG00000001336 | ISCA1     | -1.007809986 | -0.728      |
| ENSCAFG00000005037 | KLF5      | 1.236429367  | 1.881       |
| ENSCAFG00000006840 | LDLRAD3   | 1.386681603  | 1.101       |
| ENSCAFG00000005960 | LRRN1     | 1.468728589  | 1.274       |
| ENSCAFG00000016465 | MAGED2    | 1.263446026  | 0.739       |
| ENSCAFG00000010758 | MAP2K6    | 1.574037058  | -1.483      |
| ENSCAFG00000005963 | METTL21C  | -4.337630234 | -2.716      |
| ENSCAFG00000009110 | MT1E      | 1.684552853  | 3.302       |
| ENSCAFG00000023759 | MT2A      | 2.547857727  | 4.818       |
| ENSCAFG00000028459 | MT3       | 6.12600805   | 4.655       |
| ENSCAFG00000013728 | MYL4      | 3.638724975  | 3.71        |
| ENSCAFG00000010309 | MYOG      | 1.52088885   | 1.958       |
| ENSCAFG00000009777 | NAV2      | 2.360013976  | 1.107       |
| ENSCAFG00000013844 | NCAM1     | 3.120117838  | 1.531       |
| ENSCAFG00000016769 | NES       | 1.905412123  | 1.45        |
| ENSCAFG00000003720 | NRCAM     | 4.283879136  | 1.864       |

|                     |            |              |        |
|---------------------|------------|--------------|--------|
| ENSCAFG00000032227  | OLFM1      | 2.018599342  | 0.883  |
| ENSCAFG00000015539  | PAX7       | 1.395532008  | -1.376 |
| ENSCAFG00000010225  | PHKB       | -1.025976526 | -1.095 |
| ENSCAFG00000009076  | PLBD2      | 2.689637486  | 0.7    |
| ENSCAFG00000005362  | PLD3       | 1.089200362  | 0.973  |
| ENSCAFG00000003096  | PM20D2     | 1.866701978  | -2.123 |
| ENSCAFG00000018654  | PRR32      | 2.403978145  | 3.226  |
| ENSCAFG00000001646  | PRUNE2     | 3.399318155  | 2.448  |
| ENSCAFG00000005870  | RASGRP3    | -1.037928066 | -1.032 |
| ENSCAFG00000006528  | RASSF7     | 1.720814154  | 3.01   |
| ENSCAFG00000012803  | RIN1       | 3.155806278  | 2.583  |
| ENSCAFG00000009596  | RUNX1      | 2.563379593  | 2.759  |
| ENSCAFG00000005839  | SATB1      | -1.232135107 | -1.032 |
| ENSCAFG00000012082  | SEMA4B     | 1.228537847  | 1.143  |
| ENSCAFG00000012290  | SFN        | 1.462504245  | 2.642  |
| ENSCAFG00000019194  | SLC43A2    | 1.785886391  | 1.035  |
| ENSCAFG00000008028  | SLC9A9     | 1.345211158  | 1.247  |
| ENSCAFG00000012460  | SMYD2      | -1.16803138  | -1.346 |
| ENSCAFG00000004374  | SOX9       | 2.155439117  | 1.965  |
| ENSCAFG00000004500  | SYTL2      | -1.06740374  | -1.759 |
| ENSCAFG000000032112 | TAL2       | 2.94392871   | 1.918  |
| ENSCAFG00000011533  | TARBP1     | 1.065472211  | -1.641 |
| ENSCAFG00000012517  | TMOD4      | -1.118371009 | -0.822 |
| ENSCAFG00000010798  | TNNT2      | 3.137959501  | 1.868  |
| ENSCAFG00000014443  | TSC22D4    | 1.17473527   | 1.301  |
| ENSCAFG00000009337  | TUBB2A     | 3.250224395  | 1.063  |
| ENSCAFG00000018832  | TUBB6      | 1.60572272   | 2.568  |
| ENSCAFG00000015878  | UCHL1      | 1.546077843  | 3.884  |
| ENSCAFG00000013489  | UCK2       | 1.936783208  | 1.469  |
| ENSCAFG00000012376  | VASH2      | 2.084699386  | 1.714  |
| ENSCAFG00000013039  | ZNF365     | -1.070865273 | 2.396  |
| ENSCAFG00000015731  | ZNF385C    | 4.692270181  | 3.38   |
| ENSCAFG00000001985  | ENSMUSG000 | 1.039690188  | 2.188  |
| ENSCAFG00000003564  | ENSMUSG000 | 1.015664287  | 0.849  |
| ENSCAFG00000003676  | ENSMUSG000 | -1.074228768 | -1.857 |
| ENSCAFG00000004124  | ENSMUSG000 | 1.144810094  | 1.034  |
| ENSCAFG00000009113  | ENSMUSG000 | 1.662637003  | 3.302  |
| ENSCAFG00000011368  | ENSMUSG000 | 1.480762529  | -1.692 |
| ENSCAFG00000023152  | ENSMUSG000 | 1.153009884  | 1.008  |
| ENSCAFG00000030662  | ENSMUSG000 | 3.778100823  | 3.483  |
| ENSCAFG00000032235  | ENSMUSG000 | 1.063675433  | -1.146 |

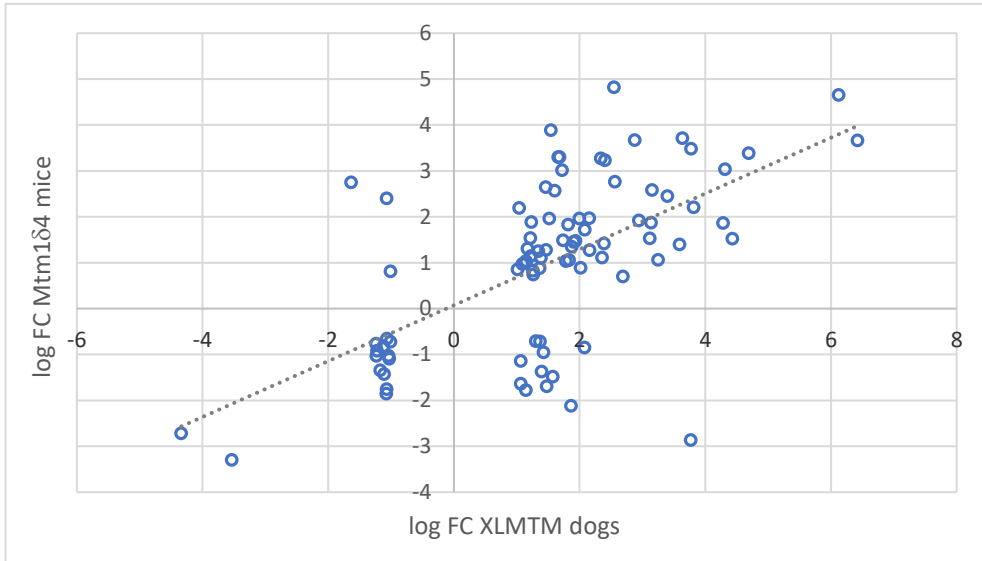

Spearman rank correlation  $r = 0.6$   
p-value  $1.1E-9$

## Supplemental Methods:

Detailed below is the raw R code used to analyse the RNA-sequencing count tables

```
# Import .csv files: read counts (count_table.csv), information about
samples and groups (samples_info.csv), and gene annotation file
(gene_info.csv)
> samples_info <- read_csv("samples_info.csv")
> count_table <- read_csv("count_table.csv")
> gene_info <- read_csv("gene_info.csv")

# Call the packages necessary for data processing and analysis
> library(limma)
> library(edgeR)
> library(genefilter)
> library(pheatmap)
> library(viridis)
> library(dplyr)

# Reformat count_table into a matrix of counts with row.names corresponding
to the column of gene_info which will be used for gene annotation (e.g.
ensembl identifiers). Requires same number of lines in count_table.csv and
gene_info.csv
> Mat<-as.matrix(count_table[,2:14])
> row.names(Mat)<-count_table$Gene_id

# Create a DGEList object, filtering off the genes not expressed in any dog
> DGE<-DGEList(counts=Mat, lib.size=colSums(Mat),
norm.factors=rep(1,ncol(Mat)), samples=samples_info, genes=gene_info,
remove.zeros=TRUE)
Removing x rows with all zero counts

# Transform raw counts into count per million reads (cpm), and log(cpm)
> DGEcpm<-cpm(DGE, log=FALSE)
> DGElcpm<-cpm(DGE, log=TRUE)

# keep only genes with cpm>1 in at least 3 Dogs
> keep.exprs<-rowSums(DGEcpm>1)>=3
> DGE<-DGE[keep.exprs, , keep.lib.sizes=FALSE]
> DGElcpm<-cpm(DGE, log=TRUE)

# incorporate normalization (scaling) factors to reduce heteroscedasticity,
using the trimmed mean of M-values (TMM) method
> DGE<-calcNormFactors(DGE, method="TMM")

# Genewise Negative Binomial Generalized Linear Fitting using the edgeR
package
> design<-model.matrix(~0+Treatment)
> colnames(design)<-gsub("Treatment", "", colnames(design))
# 'Treatment' corresponds to the name of the column in the
"samples_info.csv" file on which the statistical comparison is performed.
> estdisp<-estimateDisp(BicepsDGE, design)
> fit<-glmFit(estdisp, design)

# Factors=c("AAVHigh", "AAVLow", "AAVMid", "WT", "None")
> lrt<-glmLRT(fit, contrast=c(0,0,0,-1,1)) # hence contrast=None-WT

# Subset DE genes: p value ≤ 0.05 & fold change ≥ 2 or ≤ -2
> DE_genes<-lrt[which(lrt$table$PValue<=0.05 & abs(lrt$table$logFC)>1),]

# Same analysis done for contrast=c(1,0,0,0,-1), named lrt2 and DE_genes2
```

```

and c(1,0,0,-1,0), named lrt3 and DE_genes3

# Extract list of Rescued genes in AAVHigh dogs = common genes between
DE_genes and DE_genes2 that are not present in DE_genes3
> RescHigh<-dplyr::semi_join(DE_genes$genes, DE_genes2$genes, by="X1")
> RescHigh<-dplyr::anti_join(RescHigh, DE_genes3$genes, by="X1")

# Extract list of Resistant genes in AAVHigh dogs = common genes between
DE_genes1 and DE_genes3 that are not present in DE_genes2
> ResistHigh<-dplyr::semi_join(DE_genes$genes, DE_genes3$genes, by="X1")
> ResistHigh<-dplyr::anti_join(ResistHigh, DE_genes2$genes, by="X1")

# Extract list of Induced genes in AAVHigh dogs = common genes between
DE_genes2 and DE_genes3 that are not present in DE_genes
> IndHigh<-dplyr::semi_join(DE_genes2true$genes, DE_genes3$genes, by="X1")
> IndHigh<-dplyr::anti_join(IndHigh, DE_genes$genes, by="X1")

# Extract list of DE genes that are present in DE_genes, DE_genes2, and
DE_genes3.
> TriHigh<-dplyr::intersect(DE_genes$genes, DE_genes2$genes)
> TriHigh<-dplyr::intersect(TriHigh, DE_genes3$genes)
> length(TriHigh$X1)

# Create a matrix with grouped median lcpm values of TriHigh genes
> TriHighMat<-matrix(c(1:12),nrow=4,ncol=3)
> row.names(TriHighMat)<-TriHigh$X1
> colnames(TriHighMat)<-c("WT","XLMTM","AAVHigh")
> for(i in 1:4){
+   TriHighMat[i,1]<-(DGEIcpm[TriHigh[i,1],1]+DGEIcpm[TriHigh[i,1],7])/2
+   TriHighMat[i,2]<-
(DGEIcpm[TriHigh[i,1],4]+DGEIcpm[TriHigh[i,1],8]+DGEIcpm[TriHigh[i,1],10])/
3
+   TriHighMat[i,3]<-
(DGEIcpm[TriHigh[i,1],12]+DGEIcpm[TriHigh[i,1],13])/2
+   }

# Use operators to extract lists of Partially Rescued and Worsened genes
> PartHigh<-which((TriHighMat[,1]<TriHighMat[,3] &
TriHighMat[,3]<TriHighMat[,2]) | (TriHighMat[,1]>TriHighMat[,3] &
TriHighMat[,3]>TriHighMat[,2]))
> WorHigh<-which((TriHighMat[,1]<TriHighMat[,2] &
TriHighMat[,2]<TriHighMat[,3]) | (TriHighMat[,1]>TriHighMat[,2] &
TriHighMat[,2]>TriHighMat[,3]))

# Similar analyses can be performed for AAVMid and AAVLow dogs by changing
the contrasts taken as inputs for lrt2 and lrt3

```
